# Supplementary material for: Translation repression via modulation of the cytoplasmic poly(A)-binding protein in the inflammatory response
Source: eLife. 2017 Jun 21;6:e27786. doi: 10.7554/eLife.27786 (PMC5507668; doi:10.7554/eLife.27786)
Supplement: Supplementary file 1. — The first tab listed the TEs of the differentially translated mRNAs during the inflammatory response. The second tab listed the TEs of all the mRNAs during the inflammatory response. DOI: http://dx.doi.org/10.7554/eLife.27786.017 [file elife-27786-supp1.xlsx]

## Sheet: differential genes
Gene name	cluster	RFL 0hA	RFL 0hB	RFL 1hA	RFL 1hB	RFL 2hA	RFL 2hB	RFL 4hA	RFL 4hB	RFL 6hA	RFL 6hB	FL 0hA	FL 0hB	FL 1hA	FL 1hB	FL 2hA	FL 2hB	FL 4hA	FL 4hB	FL 6hA	FL 6hB	TE 0hA	TE 0hB	TE 1hA	TE 1hB	TE 2hA	TE 2hB	TE 4hA	TE 4hB	TE 6hA	TE 6hB	0h vs 1h pvalue	1h vs 2h pvalue	2h vs 4h pvalue	4h vs 6h pvalue
Ap3s2	1	51.2592	59.852	25.6638	11.2173	18.9152	39.6079	29.9584	25.3161	22.1379	17.6228	16.8394	13.4722	13.9084	11.0684	10.1011	10.6623	8.76939	8.82594	8.80881	7.8967	3.04401	4.44264	1.8452	1.01346	1.87258	3.71477	3.41625	2.86838	2.51316	2.23167	0.0111748	0.0942235	0.293158	0.152033
Ate1	1	38.2641	26.8815	25.2369	6.17104	23.7515	7.4902	13.4081	11.8862	9.5691	17.4322	18.5131	19.8299	18.727	15.822	11.8179	13.4148	8.7096	9.02812	6.76907	7.40446	2.06686	1.35561	1.34762	0.390028	2.0098	0.558355	1.53946	1.31658	1.41365	2.35429	0.00910761	0.191328	0.225261	0.340494
Atraid	1	159.418	131.286	122.544	29.216	83.0945	79.6327	59.6048	61.4843	60.405	57.4478	79.0451	74.5731	67.0767	69.8096	60.1304	59.3544	38.7573	31.8473	28.3752	25.2687	2.0168	1.7605	1.82693	0.41851	1.38191	1.34165	1.5379	1.9306	2.12879	2.27347	0.0158803	0.124055	0.300351	0.414033
BC031181	1	382.856	290.467	321.593	38.2266	143.837	267.923	157.758	233.744	203.232	274.044	77.5676	91.675	69.2677	66.74	71.4028	73.7029	64.8855	70.1801	77.4976	76.5	4.93577	3.16844	4.64276	0.572769	2.01444	3.63517	2.43133	3.33063	2.62243	3.58227	0.0109846	0.114525	0.533092	0.961697
Bckdk	1	49.8464	51.7927	29.2906	17.1719	23.3579	37.5411	14.2468	17.9668	13.3137	5.7068	61.7453	49.8916	50.6145	42.7227	42.3977	37.7612	22.0126	27.3661	16.0237	14.8775	0.807291	1.03811	0.5787	0.401938	0.550923	0.994172	0.647208	0.656533	0.830881	0.383587	0.0311505	0.15645	0.550162	0.960948
Bscl2	1	44.1095	54.9506	22.2065	16.4164	31.5922	33.0346	18.5879	24.1542	7.955	23.8688	41.4956	35.9163	31.6261	33.4091	31.5737	31.2529	23.5063	27.4142	22.5794	22.1528	1.06299	1.52996	0.702156	0.491374	1.00059	1.05701	0.790762	0.881084	0.352312	1.07746	0.014573	0.068501	0.349869	0.682832
Chid1	1	52.0891	22.8324	14.066	10.1621	8.95347	16.8787	14.9271	8.69933	19.6973	19.8411	25.5089	23.9432	22.6091	21.2781	16.6928	20.261	14.0923	14.159	17.8089	15.9502	2.04199	0.953606	0.622137	0.477586	0.536368	0.833061	1.05924	0.614403	1.10604	1.24394	0.00443921	0.499079	0.450101	0.0828008
Cmpk1	1	200.391	147.977	115.9	51.9396	62.9431	141.569	100.454	108.194	115.441	83.4297	92.6735	96.7356	89.7307	91.2206	67.912	76.5647	53.5303	66.6923	55.0739	63.3566	2.16233	1.52971	1.29164	0.569384	0.926833	1.84901	1.87658	1.62228	2.0961	1.31683	0.0180865	0.176142	0.164673	0.754291
Cmtm6	1	102.113	168.33	91.7397	24.6594	81.139	149.037	233.607	244.14	256.028	238.016	38.4098	36.9896	33.3403	33.9947	39.79	44.9546	111.976	108.049	127.16	114.907	2.6585	4.55073	2.75161	0.72539	2.03918	3.31529	2.08622	2.25954	2.01343	2.07137	0.0128901	0.0744304	0.834152	0.715955
Cnot2	1	40.9342	40.8657	32.9839	5.46094	22.1495	23.8154	27.2734	19.9461	15.8069	10.1632	20.1752	23.0375	18.819	18.8863	20.7236	20.0037	17.6852	19.0728	14.0519	14.742	2.02894	1.77388	1.7527	0.289148	1.06881	1.19055	1.54216	1.04579	1.1249	0.689403	0.00176642	0.114943	0.574464	0.143618
Csnk1d	1	85.6701	85.8787	45.3958	29.264	49.8318	46.5831	47.6838	67.7627	40.1708	61.2224	33.4334	32.6179	31.6032	31.2832	35.6718	35.2655	32.9095	37.5262	39.7302	38.5942	2.56241	2.63287	1.43643	0.935455	1.39695	1.32093	1.44894	1.80574	1.01109	1.58631	0.021538	0.577729	0.41246	0.332255
Dhcr24	1	116.518	104.735	69.9435	36.0692	81.4114	60.1514	29.1866	28.2771	15.3073	16.6557	57.7549	52.4278	50.7998	51.366	40.7677	44.4371	23.3287	23.6995	11.8694	12.23	2.01745	1.9977	1.37685	0.702199	1.99696	1.35363	1.2511	1.19315	1.28965	1.36187	0.0310662	0.101592	0.282958	0.646509
Eif4e	1	191.262	179.35	118.543	46.209	142.669	137.123	78.8242	90.5995	92.4566	63.4089	99.0845	95.2024	119.543	89.5577	127.177	92.7172	71.2357	63.5285	56.3076	44.3278	1.93029	1.88388	0.991638	0.515969	1.12181	1.47893	1.10653	1.42612	1.64199	1.43045	0.00254119	0.0673442	0.991784	0.366142
Fnta	1	64.0668	48.5237	36.6978	10.9365	28.2069	30.3413	23.2044	25.4118	24.2266	27.692	28.9332	30.8074	23.0135	24.168	19.4651	20.336	16.2388	19.6344	19.9582	18.7917	2.2143	1.57507	1.59462	0.452519	1.4491	1.492	1.42895	1.29425	1.21387	1.47362	0.0132842	0.0841666	0.86591	0.995866
Ghdc	1	14.602	27.5355	10.7419	5.5194	15.5615	7.52198	5.04463	11.9698	15.9761	9.04915	8.18738	8.7625	7.47769	9.08827	7.43541	7.1842	6.52177	6.07983	6.45789	5.75811	1.78348	3.14242	1.43653	0.607311	2.09289	1.04702	0.773506	1.96877	2.47389	1.57155	0.00931079	0.166624	0.465529	0.0627814
Gng12	1	191.428	198.319	79.7112	84.6446	93.1901	136.752	184.496	161.283	296.38	159.708	30.5685	24.8143	33.1442	25.6692	21.2766	28.8403	43.9142	51.3819	59.3399	57.1181	6.26225	7.99213	2.40498	3.29751	4.37994	4.74172	4.20129	3.13891	4.99461	2.7961	0.033636	0.242688	0.968906	0.75348
Got1	1	70.3811	73.5394	43.9965	24.703	42.2963	55.3544	30.0059	29.6874	20.6261	21.4714	25.1296	25.504	23.7789	24.6444	19.8892	18.0943	15.6237	17.5989	12.604	10.704	2.80073	2.88345	1.85023	1.00238	2.12659	3.05922	1.92053	1.68689	1.63648	2.00592	0.039573	0.0769246	0.35008	0.916968
Gpaa1	1	58.4608	50.257	47.3494	13.5742	28.3403	39.0419	27.5129	30.537	36.2234	36.5089	34.8111	28.5823	30.9136	30.1087	26.8082	29.8404	25.3853	22.7475	21.9449	17.8416	1.67937	1.75832	1.53167	0.450839	1.05715	1.30836	1.08381	1.34243	1.65065	2.04628	0.0213894	0.219143	0.860991	0.0654906
H2-DMa	1	27.8177	29.7548	13.6091	8.2616	22.847	14.5857	11.0322	16.7166	20.9632	19.4689	9.87976	8.59511	7.68269	7.63838	6.15001	7.93293	7.39544	7.23901	10.5039	8.4412	2.81563	3.46183	1.77139	1.08159	3.71496	1.83862	1.49176	2.30924	1.99574	2.30641	0.0357669	0.0934415	0.354281	0.659102
Hist1h3a	1	334.242	259.11	216.786	55.9914	122.498	170.222	44.9891	44.2448	22.2623	11.451	160.93	131.319	129.627	128.343	99.9263	108.6	26.6713	33.4176	6.49607	5.71314	2.07694	1.97313	1.67239	0.436265	1.22588	1.56742	1.6868	1.32399	3.42703	2.00433	0.00618326	0.100499	0.655749	0.162825
Ireb2	1	23.9941	22.4288	13.7462	9.37522	11.7949	27.9145	16.0665	22.6814	10.1131	15.8495	14.2322	14.0116	14.816	13.3076	16.7427	13.6991	14.0212	15.3277	12.0163	14.5329	1.68591	1.60074	0.927793	0.704501	0.704476	2.03769	1.14587	1.47976	0.841616	1.09059	0.0318635	0.255109	0.571736	0.266226
Itpkb	1	14.2578	16.7279	28.1691	14.095	51.2124	47.6694	18.6743	19.1638	45.6412	42.7094	12.299	10.8141	26.6593	31.2668	50.6728	48.6968	18.8863	22.3434	51.7827	57.3716	1.15926	1.54686	1.05664	0.450798	1.01065	0.978903	0.988776	0.857697	0.881399	0.744434	0.0276469	0.19507	0.728591	0.717822
Lims1	1	75.2117	63.6889	72.0574	23.3525	76.8388	98.5895	145.413	148.629	143.272	135.646	49.1619	50.4933	60.3771	50.0685	75.6976	69.112	106.242	112.042	119.934	113.65	1.52988	1.26133	1.19346	0.466412	1.01508	1.42652	1.3687	1.32655	1.19459	1.19354	0.0405974	0.109426	0.560467	0.652315
Lypla2	1	110.742	104.665	81.6963	21.3568	71.6223	55.8826	55.6311	51.9225	50.3375	57.3485	38.7335	29.257	29.2448	30.0798	26.7397	26.2491	23.2165	27.6702	23.7778	23.8423	2.85908	3.57745	2.79353	0.710003	2.6785	2.12893	2.39619	1.87648	2.117	2.40532	0.0198976	0.107267	0.913677	0.979214
Mtx1	1	28.1682	37.1823	21.4364	7.24013	18.0114	10.8827	16.4739	22.2397	10.5665	23.4953	17.2839	17.7396	13.0114	14.0861	13.2746	15.6763	14.9852	16.9503	13.4017	13.2835	1.62973	2.09601	1.6475	0.513991	1.35683	0.694217	1.09934	1.31206	0.788442	1.76876	0.0374025	0.758524	0.40528	0.810835
Mul1	1	15.4293	28.9325	31.3117	12.2196	53.5739	53.9337	26.3802	26.6272	18.9483	14.3981	10.5711	10.2358	18.4844	20.0798	41.5207	44.0302	21.0749	23.1624	18.811	15.1138	1.45957	2.82661	1.69395	0.608555	1.29029	1.22492	1.25174	1.14959	1.0073	0.952649	0.0484476	0.446156	0.914295	0.516583
Ndel1	1	39.1359	29.6368	39.5197	19.3446	29.1276	43.0342	22.0079	30.6848	28.2321	26.4718	24.4436	25.949	40.5847	45.8538	39.9765	41.2171	22.1108	28.1282	36.3926	38.5818	1.60107	1.14212	0.973758	0.421876	0.728617	1.04409	0.995348	1.09089	0.775766	0.686123	0.0161005	0.283233	0.439439	0.191161
Nupl1	1	54.4507	34.1282	45.8173	13.3865	61.8274	38.3112	40.9655	48.1303	26.985	20.242	27.3038	32.4133	31.449	31.3187	33.0614	37.2407	25.396	31.2908	18.0794	19.0945	1.99426	1.05291	1.45688	0.427428	1.87008	1.02875	1.61306	1.53816	1.49259	1.0601	0.046599	0.0552476	0.526064	0.33373
Opa3	1	23.1158	38.4619	26.3871	6.55313	26.7415	35.7231	18.717	13.0896	13.5488	8.71132	10.2405	11.7638	17.7266	15.4949	20.6275	20.7417	10.0375	14.7521	10.4079	10.0434	2.2573	3.26951	1.48857	0.422922	1.2964	1.72228	1.8647	0.887305	1.30178	0.867369	0.00115176	0.0831925	0.716152	0.512838
Osgin2	1	7.05233	8.34432	29.3391	8.1748	17.9322	17.0745	18.099	17.9516	5.5114	6.85098	8.50535	9.98934	34.3697	32.6847	33.3758	28.7439	19.9955	21.4634	10.0635	10.3785	0.829163	0.835323	0.853633	0.250111	0.537281	0.594023	0.905153	0.836382	0.547662	0.660111	0.0423856	0.558468	0.0723906	0.396612
Pgs1	1	28.5752	33.7755	22.1026	7.79094	30.4789	28.2334	44.7361	36.9853	51.6188	37.8964	24.333	22.6774	30.6222	28.3892	51.2146	52.6692	60.6284	68.5912	58.7777	55.0937	1.17434	1.48939	0.721782	0.274434	0.595122	0.536051	0.737873	0.539214	0.878204	0.687854	0.000423851	0.3854	0.826757	0.138587
Pi4ka	1	21.3644	22.1468	15.4844	8.94074	13.4811	17.7857	15.3925	17.6942	14.3111	19.3615	13.8706	14.9902	15.6951	13.869	13.3446	12.175	13.4549	16.0487	15.5742	16.4711	1.54026	1.47742	0.986573	0.644656	1.01023	1.46084	1.14401	1.10253	0.918904	1.17548	0.0443513	0.175949	0.805096	0.872268
Pnp	1	114.908	149.369	92.9118	23.0742	169.689	96.4193	513.058	625.119	827.148	760.069	66.1954	52.3671	58.7763	42.1083	88.1974	85.7287	410.04	356.961	622.056	505.201	1.73589	2.85235	1.58077	0.547974	1.92396	1.1247	1.25124	1.75122	1.3297	1.50449	0.0094839	0.136726	0.917271	0.918515
Polr2g	1	100.421	79.3245	63.6845	17.2536	73.394	98.757	179.659	218.596	153.391	120.031	56.821	52.8471	42.5145	39.4198	80.3629	68.1094	113.185	123.385	90.9216	80.4732	1.76732	1.50102	1.49795	0.437688	0.913282	1.44998	1.5873	1.77167	1.68706	1.49156	0.0316083	0.276231	0.0955139	0.797426
Ppp4r2	1	18.6699	16.5677	15.6289	13.6436	34.9063	40.3934	30.6374	37.4555	26.263	11.5701	11.1266	11.0056	19.25	17.8121	34.9203	37.2443	29.1852	33.6546	17.4815	18.6712	1.67795	1.50538	0.811888	0.76597	0.999599	1.08455	1.04976	1.11294	1.50233	0.619675	0.0399036	0.393444	0.865764	0.698012
Prdx2	1	286.078	302.048	184.753	65.4757	142.059	154.128	206.441	230.998	249.209	171.441	169.928	153.685	143.559	138.115	129.32	124.895	158.51	175.106	193.018	154.924	1.68353	1.96537	1.28694	0.474068	1.09851	1.23406	1.30238	1.31919	1.29112	1.10661	0.00761703	0.165119	0.566885	0.760682
Psmf1	1	60.4155	31.9124	16.7852	10.1495	37.1142	14.82	25.9125	27.3068	58.4564	26.5023	13.1888	12.0177	12.3597	7.24911	9.00029	9.20428	12.1831	13.9275	11.6301	11.6177	4.58081	2.65544	1.35807	1.4001	4.12366	1.61012	2.12693	1.96064	5.02632	2.28121	0.0148646	0.0958409	0.641833	0.134757
Ptdss1	1	54.974	35.0635	34.7238	6.23386	30.5264	47.1509	22.3836	19.5673	19.333	20.441	61.8806	61.1641	58.3259	56.7222	55.0528	55.2916	39.6399	37.0591	37.3809	34.5734	0.888389	0.57327	0.595342	0.109902	0.554493	0.852768	0.564673	0.528002	0.51719	0.591235	0.046585	0.0589586	0.219276	0.412582
Ralb	1	104.485	115.9	66.1022	23.7916	85.4364	48.6356	78.7482	64.3595	50.1735	60.0913	55.1353	53.093	60.4852	64.4969	65.4837	68.3321	46.5415	58.4673	49.8456	52.4557	1.89506	2.18296	1.09287	0.368879	1.3047	0.711753	1.692	1.10078	1.00658	1.14556	0.000301957	0.158276	0.139898	0.364471
Ralgapa2	1	11.0031	8.58886	7.23637	5.5454	11.2765	6.92762	10.5089	12.5712	8.28047	7.16694	11.0513	12.0373	14.8465	13.3929	19.2864	19.3599	16.8396	17.7288	10.3633	10.8625	0.995643	0.713518	0.487411	0.414054	0.584688	0.357834	0.624056	0.709083	0.799021	0.659787	0.0288202	0.829661	0.153136	0.333007
Rapgef2	1	7.63842	5.54775	9.27301	15.5361	63.2453	62.254	76.8102	76.0322	81.4401	68.2634	5.07941	5.28712	22.8022	26.7904	74.2129	80.7067	104.956	123.655	124.089	129.903	1.5038	1.04929	0.406672	0.579911	0.852215	0.771361	0.731834	0.614873	0.656304	0.525494	0.00151707	0.0883696	0.288996	0.790438
Rassf2	1	54.2971	46.9433	32.8136	10.2618	18.3626	19.7436	9.75351	7.23447	9.36027	19.2585	28.0453	26.8195	20.0884	20.1198	13.5531	11.0772	6.776	7.48046	8.35945	8.69955	1.93605	1.75034	1.63346	0.510037	1.35487	1.78236	1.43942	0.967116	1.11972	2.21373	0.0351076	0.108101	0.397282	0.21817
Rnf14	1	11.2097	15.987	11.7805	5.64951	21.5571	23.9228	26.0812	37.9995	25.0297	36.4776	18.6921	17.997	22.1253	20.7961	30.8584	34.1415	45.4571	49.0549	42.7426	45.6578	0.599703	0.888319	0.532446	0.271662	0.69858	0.700696	0.573755	0.774631	0.58559	0.798936	0.0219127	0.0510307	0.623444	0.456742
Rpl7l1	1	93.9771	87.2606	61.0713	20.7546	47.3811	72.6158	39.4759	51.9345	24.7561	28.1204	61.7749	59.1104	62.4931	44.9581	63.678	49.0557	43.8074	44.9597	42.5765	38.7198	1.52128	1.47623	0.977249	0.461642	0.744072	1.48027	0.901124	1.15513	0.581451	0.726254	0.0118045	0.157308	0.955843	0.13054
Rrp1	1	93.131	98.6366	74.8781	26.6504	71.1248	76.0278	86.4736	77.9772	61.6797	88.3042	51.9904	55.8298	50.5621	49.2584	46.4402	50.7984	52.7712	62.6981	53.5031	51.358	1.79131	1.76674	1.48091	0.541033	1.53153	1.49666	1.63865	1.24369	1.15283	1.71939	0.0302394	0.0832426	0.934292	0.979671
Slc44a1	1	81.55	80.3104	64.4825	24.9607	128.968	133.404	133.259	110.443	111.919	148.516	64.6423	62.986	70.1792	60.7844	138.855	136.426	143.343	133.217	132.094	131.155	1.26156	1.27505	0.918826	0.410643	0.928792	0.977847	0.929655	0.829048	0.847264	1.13237	0.0126464	0.113181	0.665027	0.430246
Slc8a1	1	29.3182	23.7997	19.4719	6.24619	11.0627	17.0936	12.5293	11.5566	16.8717	11.5175	18.2997	21.1257	18.4398	19.2521	15.5942	15.177	10.7269	11.8108	9.89046	10.2285	1.60211	1.12657	1.05597	0.324442	0.709408	1.12628	1.16803	0.978474	1.70586	1.12602	0.00472807	0.136343	0.416627	0.238195
Slc9a7	1	46.4977	30.1531	17.1483	17.0348	22.2687	20.1753	13.7689	14.1198	5.86999	8.62667	16.3466	19.0897	16.2267	17.0081	11.4277	13.4145	8.98149	8.35041	6.13585	6.45603	2.84449	1.57955	1.0568	1.00157	1.94866	1.50399	1.53304	1.69091	0.956671	1.33622	0.0357276	0.129968	0.933555	0.201541
Snw1	1	62.5524	41.4167	32.4735	13.1967	24.4782	30.3493	71.077	74.6865	55.706	49.7048	28.7788	34.733	24.3985	24.0606	21.4476	26.7513	49.042	57.6371	44.432	51.1942	2.17356	1.19243	1.33096	0.548477	1.1413	1.1345	1.44931	1.29581	1.25374	0.970906	0.046914	0.317561	0.407693	0.377332
Stim1	1	37.0767	21.6128	23.3212	8.58033	10.6103	28.0644	17.5051	11.9972	8.87004	14.4478	16.2901	15.5714	15.5255	15.2039	12.5033	13.5791	11.9222	12.0958	9.52948	9.9973	2.27602	1.38798	1.50212	0.56435	0.848602	2.06674	1.46827	0.991856	0.9308	1.44517	0.0425824	0.25326	0.877437	0.971548
Taf10	1	103.614	63.4117	40.7852	31.5119	38.0764	55.2152	30.4177	30.8297	25.13	20.3465	108.986	75.3825	85.3437	73.7148	64.8061	62.5337	41.9039	46.4592	41.8491	38.9752	0.95071	0.8412	0.477894	0.427484	0.587544	0.882968	0.725893	0.663586	0.600489	0.522038	0.0237599	0.136854	0.800426	0.758716
Tgfbr2	1	85.2502	92.3816	68.5362	36.3548	53.9469	38.1723	27.3481	23.1999	32.7991	17.1344	70.7632	75.6447	75.2325	78.8054	58.0978	66.5729	30.1351	29.1679	21.7969	20.8119	1.20473	1.22126	0.910992	0.461324	0.928553	0.573391	0.907515	0.795391	1.50476	0.823297	0.0322842	0.595932	0.547382	0.150726
Tm9sf3	1	225.329	189.792	175.858	71.6178	129.862	149.824	93.729	110.299	98.5992	108.106	205.364	223.542	216.628	200.983	197.219	194.094	155.584	145.241	139.335	129.378	1.09722	0.849023	0.811795	0.356337	0.658467	0.771915	0.602434	0.759417	0.707641	0.835577	0.0302681	0.283056	0.659014	0.258783
Tmem123	1	231.88	168.519	139.954	93.6928	260.869	228.601	187.447	161.275	112.478	224.992	83.3216	81.4681	97.97	96.0882	109.638	119.094	79.6914	88.5153	73.5568	76.0094	2.78296	2.06853	1.42854	0.975071	2.37936	1.9195	2.35216	1.822	1.52913	2.96006	0.0403629	0.0770763	0.870425	0.932883
Tmem199	1	32.5183	34.6836	25.6986	6.61852	13.3288	12.5634	9.72194	5.66583	11.7291	18.2249	18.2595	16.7875	16.8933	14.0603	8.74125	9.68413	5.71021	6.44743	7.06544	6.81324	1.7809	2.06604	1.52123	0.470724	1.52482	1.29732	1.70255	0.878773	1.66007	2.67493	0.0251996	0.155023	0.760951	0.0704293
Tor2a	1	34.6933	27.2965	23.9461	5.48944	9.95596	29.3012	15.2309	16.1864	9.45798	21.0812	28.1674	25.0978	21.13	24.8128	20.139	19.197	14.4542	14.3572	15.6389	14.5631	1.23168	1.08761	1.13327	0.221235	0.494362	1.52634	1.05374	1.1274	0.604771	1.44757	0.0183938	0.124624	0.299975	0.894958
Trim35	1	63.1581	40.8673	43.8681	10.9892	31.2079	24.0137	33.3972	22.0586	57.5845	48.6104	32.931	30.356	28.4256	27.2037	22.9216	26.7236	23.3081	25.169	34.9673	36.0887	1.91789	1.34627	1.54326	0.403958	1.36151	0.898597	1.43286	0.876419	1.64681	1.34697	0.0218586	0.195106	0.931451	0.187238
Ubac2	1	37.6674	49.3035	27.5188	10.8208	21.9726	27.9413	29.8372	21.9391	28.2596	52.9953	23.8299	21.0382	22.3705	19.9072	17.3751	17.3171	17.1974	18.3348	19.2877	18.6819	1.58068	2.34352	1.23013	0.54356	1.2646	1.61351	1.73498	1.19658	1.46516	2.83672	0.0122085	0.0904533	0.849076	0.192334
Uckl1	1	14.709	18.1581	8.30504	6.09788	9.58092	11.7323	8.07902	11.3615	10.0119	8.58298	12.1979	12.164	11.399	10.331	9.14324	10.1032	9.41871	10.1132	10.9185	9.66394	1.20587	1.49278	0.728577	0.590251	1.04787	1.16124	0.857763	1.12343	0.916963	0.888145	0.0348318	0.124204	0.62036	0.995495
Usmg5	1	242.666	211.852	160.733	37.3693	176.439	118.06	161.349	165.768	84.286	115.159	264.804	195.247	233.062	202.366	231.069	189.199	181.753	157.705	180.033	131.17	0.916396	1.08505	0.689657	0.184662	0.763577	0.623998	0.887736	1.05112	0.468169	0.87794	0.00442843	0.0810464	0.196966	0.228359
Vapb	1	116.528	115.622	48.0008	23.4375	67.1592	41.3032	55.4003	70.5693	95.2443	60.7011	51.1209	46.7888	44.7527	47.8662	40.0273	41.2162	39.4718	44.6185	44.9349	43.7217	2.27946	2.47114	1.07258	0.489646	1.67783	1.00211	1.40354	1.58161	2.11961	1.38835	0.000335938	0.0599014	0.531795	0.580666
Vps11	1	30.2896	36.9586	20.117	8.53479	16.2171	16.1705	18.3465	16.5727	18.7219	17.8486	18.9352	19.1456	17.0065	14.3926	11.7945	12.0152	12.5991	14.7682	15.8267	16.5563	1.59965	1.9304	1.1829	0.592997	1.37497	1.34583	1.45617	1.12219	1.18293	1.07805	0.023318	0.12254	0.875179	0.664976
Wbscr22	1	35.3448	38.1745	33.2684	5.62523	20.8682	13.6554	22.0344	31.3008	17.4455	28.0419	16.9249	13.9046	13.1387	14.1822	13.5586	13.2785	11.6319	15.3527	10.9427	11.5328	2.08833	2.74546	2.5321	0.396639	1.53911	1.02838	1.8943	2.03878	1.59425	2.43148	0.0137345	0.411511	0.0713445	0.878221
Wdr61	1	81.9909	63.9482	48.097	21.3067	62.276	54.7749	32.2458	45.323	34.0404	24.8906	36.1418	35.9124	36.3691	27.4247	33.7684	31.8252	30.1775	33.1901	23.8584	22.9851	2.26859	1.78067	1.32247	0.776918	1.84421	1.72112	1.06854	1.36556	1.42677	1.0829	0.0443603	0.0890273	0.15932	0.805758
Xiap	1	26.599	23.1411	10.3195	12.2226	22.5252	9.67198	18.726	13.8385	20.7871	12.5791	35.8644	36.6943	34.5775	31.0345	33.4832	29.5302	25.3389	28.4113	23.111	24.2134	0.741654	0.630646	0.298446	0.39384	0.672732	0.327528	0.739024	0.487078	0.899446	0.51951	0.020673	0.27015	0.47087	0.278631
Yeats4	1	34.4036	21.6253	11.3454	7.8025	16.0807	11.5196	15.2815	10.3902	5.3773	9.2197	31.6649	32.7551	24.7126	31.3411	20.2664	24.2337	14.4553	17.3941	13.0162	15.3382	1.08649	0.660212	0.459093	0.248954	0.793467	0.475353	1.05715	0.597336	0.413122	0.601095	0.00615844	0.0717646	0.366625	0.37118
Abcb7	1	39.3369	54.9259	43.3282	6.26058	31.9346	37.0612	25.9281	25.4572	18.6069	12.657	16.9382	22.3456	18.7141	18.5039	14.5043	17.1718	12.021	13.1871	9.94325	9.39863	2.32237	2.45802	2.31527	0.338338	2.20173	2.15826	2.15689	1.93047	1.87131	1.34669	0.00138883	0.00343365	0.959586	0.252804
Acbd3	1	49.819	37.206	18.7688	13.0512	43.16	52.9783	25.9264	29.0487	28.9111	39.408	10.6453	11.4215	9.76481	11.2178	14.5284	14.561	10.5992	12.1026	14.3671	15.0795	4.67989	3.25753	1.92208	1.16344	2.97074	3.63838	2.44608	2.4002	2.01232	2.61335	0.0108617	0.0319537	0.524329	0.678852
Acsl1	1	29.0269	22.4974	21.8067	13.2225	67.6292	70.4502	117.775	111.747	160.537	143.422	15.1573	16.6422	27.7033	24.0675	46.8164	48.2645	88.6272	94.2597	116.474	111.877	1.91504	1.35183	0.787149	0.549391	1.44456	1.45967	1.32888	1.18552	1.3783	1.28196	0.00490855	0.0137373	0.633698	0.721345
Ap2a2	1	57.8594	47.7516	34.1299	9.83634	29.6581	26.7391	16.703	18.9908	12.332	12.1021	42.4962	42.8644	40.8466	37.7936	29.9901	29.7864	18.8766	22.5457	17.1026	15.7111	1.36152	1.11401	0.835563	0.260265	0.98893	0.897695	0.884852	0.842326	0.721057	0.770287	0.00125366	0.01678	0.646093	0.7954
Cox7b	1	639.22	558.924	590.695	120.809	429.878	514.084	338.012	413.677	359.371	285.14	341.574	264.932	303.648	221.246	255.289	220.694	234.192	220.015	204.352	157.907	1.8714	2.10969	1.94533	0.54604	1.68389	2.32939	1.44331	1.88023	1.75859	1.80575	0.0360648	0.0400671	0.644202	0.759481
Csf2rb	1	29.4727	25.481	20.6699	8.51907	14.5863	35.9463	20.963	24.4963	60.2921	52.9939	29.4375	27.0016	25.8003	23.9891	23.4836	23.282	29.7111	27.6997	69.0664	63.4084	1.0012	0.943683	0.801149	0.355123	0.621127	1.54396	0.705563	0.884356	0.872958	0.835755	0.0366423	0.0477658	0.351339	0.470604
Dnajc15	1	78.8709	113.734	70.6923	14.5749	61.9338	51.4633	57.0908	57.8476	73.9653	38.7499	46.7262	59.5381	43.01	42.2381	31.3241	44.3883	25.2239	27.453	25.1619	23.727	1.68794	1.91027	1.64362	0.345065	1.9772	1.15939	2.26336	2.10715	2.93958	1.63315	0.00811671	0.0355971	0.123105	0.780068
Erbin	1	29.4877	24.0859	26.3846	19.9953	44.3059	50.2652	20.9698	24.0564	13.8268	15.9842	29.1917	35.1857	52.0736	50.4464	57.4201	54.3705	29.4357	31.6511	26.9531	28.6033	1.01014	0.684537	0.506679	0.396367	0.771611	0.924494	0.712396	0.76005	0.512995	0.558822	0.0241882	0.0257403	0.471354	0.302988
Ergic2	1	46.1454	47.2494	25.6626	5.36689	53.7566	23.3138	32.8476	23.5461	6.24162	28.5377	54.1696	57.4674	53.435	47.1863	55.1107	52.0348	44.8754	39.3683	39.4612	37.5913	0.851868	0.822194	0.480258	0.113739	0.975428	0.448042	0.731974	0.598099	0.158171	0.759156	0.0037053	0.0306058	0.863109	0.251857
Gng5	1	336.724	286.5	279.547	52.0682	294.032	171.486	167.129	220.39	170.45	126.896	267.172	155.296	199.238	177.256	189.875	185.482	128.555	145.095	141.199	127.089	1.26033	1.84486	1.40308	0.293745	1.54855	0.924545	1.30006	1.51894	1.20716	0.998483	0.00803396	0.0387869	0.490138	0.33795
Gramd1a	1	10.4402	14.9752	17.5341	5.98745	46.4431	48.9591	85.2845	78.0489	84.4038	90.8088	11.0069	9.61854	15.8499	19.445	39.5389	41.7256	56.545	63.6878	66.5911	71.86	0.948517	1.55691	1.10626	0.307917	1.17462	1.17336	1.50826	1.22549	1.26749	1.26369	0.0152072	0.0180578	0.499913	0.805351
Gsk3b	1	51.6491	39.3049	36.5634	13.6205	55.9185	31.5561	17.5619	20.9879	15.4885	19.0116	18.9973	19.7135	23.345	18.5086	18.8884	18.5039	10.491	13.9616	13.0418	14.1119	2.71877	1.99381	1.56622	0.735903	2.96046	1.70538	1.67399	1.50326	1.1876	1.3472	0.0252868	0.030611	0.279427	0.387111
Hist1h3f	1	315.251	286.495	257.253	70.3482	268.431	265.605	101.929	122.902	44.5245	26.719	260.782	222.771	223.42	217.79	207.437	257.331	104.329	122.469	37.7953	43.4662	1.20887	1.28605	1.15143	0.323009	1.29403	1.03215	0.97699	1.00354	1.17804	0.614708	0.0160224	0.0335906	0.509607	0.710411
Hist1h4f	1	582.211	679.223	422.062	73.9887	365.973	568.158	200.644	198.136	64.7196	56.7438	399.296	263.246	296.01	221.804	278.122	280.942	133.131	117.177	50.5942	38.7677	1.45809	2.58018	1.42584	0.333577	1.31587	2.02233	1.50711	1.69091	1.27919	1.46369	0.000691787	0.00549604	0.898243	0.537452
Hook3	1	27.1905	27.5471	22.6236	5.7555	29.0787	15.6875	19.1898	19.0043	17.8495	14.7555	14.2677	18.8651	15.7372	17.1458	14.117	17.0767	9.73336	12.8847	10.353	11.9234	1.90574	1.46022	1.43759	0.33568	2.05984	0.918649	1.97155	1.47495	1.72409	1.23753	0.00491822	0.0262743	0.316948	0.473403
Ier2	1	36.1948	14.2465	87.9655	8.8266	34.7091	10.8262	45.811	55.1593	79.3842	95.0416	6.67012	5.71906	17.2151	22.9324	6.41163	6.78035	11.8202	13.6583	23.1157	25.5365	5.42641	2.49105	5.10979	0.384896	5.41346	1.5967	3.87566	4.03853	3.43421	3.72179	0.00779906	0.0299182	0.117574	0.479266
Igfbp4	1	425.216	323.497	155.977	65.5241	209.905	190.677	92.0964	85.7883	62.1581	58.4107	235.927	187.854	161.703	174.718	136.936	152.811	66.8477	76.3219	47.8278	47.8796	1.80232	1.72206	0.964591	0.375027	1.53287	1.2478	1.37771	1.12403	1.29962	1.21995	0.000314827	0.00641443	0.732692	0.882598
Il6st	1	52.546	44.3418	28.5937	11.1055	32.0082	41.0388	8.88843	7.86151	9.27269	11.3561	23.4613	27.6037	23.3609	20.9536	18.6162	19.5045	7.85099	6.76352	6.32513	6.3281	2.23969	1.60637	1.224	0.530004	1.71937	2.10406	1.13214	1.16234	1.46601	1.79456	0.00724505	0.00888438	0.0670258	0.131821
Kif5b	1	65.8506	61.669	49.497	14.8936	52.8297	55.4704	86.3103	75.6256	87.3172	74.5841	40.657	54.0963	44.4946	43.2601	41.5234	46.6909	57.4026	71.6087	64.2988	71.5669	1.61966	1.13999	1.11243	0.344281	1.27229	1.18803	1.5036	1.05609	1.35799	1.04216	0.0055583	0.0139113	0.854666	0.867497
Lilr4b	1	317.842	209.003	313.347	158.367	648.954	722.834	577.553	614.746	584.291	767.685	168.254	174.772	424.792	431.554	527.467	500.092	449.896	404.55	465.485	465.314	1.88906	1.19586	0.737649	0.36697	1.23032	1.4454	1.28375	1.51958	1.25523	1.64982	0.000321817	0.00213983	0.772287	0.845266
Malt1	1	16.7411	16.8182	18.9901	14.805	90.1799	88.1101	136.562	150.452	95.5322	100.785	5.81451	5.74677	27.8786	29.7752	78.7811	79.8951	108.599	118.147	76.484	88.1544	2.8792	2.92655	0.681172	0.497226	1.14469	1.10282	1.25749	1.27342	1.24905	1.14328	1.14359e-06	0.0328198	0.583311	0.881653
Map2k3	1	114.175	84.1548	82.3156	17.6034	101.959	130.593	36.7012	32.0835	38.7437	27.5527	33.6937	26.2331	45.3077	40.3292	46.6486	42.0457	17.8183	20.2919	17.4407	18.8717	3.38862	3.20797	1.81681	0.436494	2.18568	3.10597	2.05976	1.5811	2.22145	1.46	9.86475e-05	0.00142833	0.304205	0.871723
Mfap3	1	62.1307	64.406	30.3957	6.15074	25.3069	28.5763	41.3412	37.815	60.694	86.5957	19.4841	21.5497	10.9056	11.9948	9.89583	9.72409	14.7925	12.172	23.2305	24.7469	3.18878	2.98872	2.78716	0.512786	2.55733	2.93871	2.79474	3.10671	2.61269	3.49925	0.00670651	0.0187791	0.486357	0.853819
Mrps15	1	44.3983	50.3682	30.7161	5.33975	27.7328	25.7299	21.2896	28.7328	14.1944	12.6756	32.3454	28.9494	25.0738	28.0984	23.172	24.0902	17.4262	24.408	17.4147	20.0594	1.37263	1.73987	1.22503	0.190037	1.19682	1.06806	1.2217	1.17719	0.815079	0.631903	0.00105639	0.0164938	0.776235	0.0712272
Ndufa11	1	187.323	127.094	99.6503	20.6231	131.591	143.339	82.8015	80.0339	136.444	61.2269	67.9178	54.1438	53.6301	54.5209	50.2985	52.2202	47.8343	46.9667	42.1328	35.4887	2.75808	2.34734	1.8581	0.37826	2.61621	2.74489	1.73101	1.70405	3.23843	1.72525	0.000721647	0.000804671	0.188757	0.296299
Ndufb6	1	240.017	260.598	187.3	46.1306	187.105	171.315	115.947	118.471	57.2258	87.8965	81.7708	65.8607	68.5797	74.9075	59.0981	70.8725	60.9686	57.7714	51.7606	48.4564	2.93524	3.95681	2.73112	0.615834	3.16601	2.41723	1.90175	2.05069	1.10559	1.81393	0.0053354	0.0228945	0.358283	0.175552
Noc2l	1	39.4956	56.1082	32.6932	6.28583	43.5286	31.8566	30.9058	30.9409	17.8697	23.5012	34.8928	35.1522	34.6143	29.6809	31.7546	33.1129	23.6233	27.8887	18.0993	18.3379	1.13191	1.59615	0.944499	0.21178	1.37078	0.962062	1.30828	1.10944	0.987312	1.28157	0.00116551	0.00506765	0.811121	0.910802
Nub1	1	33.8265	37.5221	27.3513	7.99126	28.6969	41.1668	147.747	158.984	160.595	137.888	18.385	21.9486	18.4851	19.0137	17.8578	22.2015	69.665	84.7572	79.5047	84.4688	1.83989	1.70955	1.47964	0.420289	1.60697	1.85423	2.12082	1.87576	2.01995	1.63241	0.0103968	0.0145968	0.407082	0.638106
Prelid3b	1	90.7765	65.8953	65.0184	12.1103	59.1527	71.1743	48.425	54.4272	50.0767	36.8927	47.8762	47.3008	53.9559	45.1946	49.4492	50.0671	35.1778	38.7096	36.5998	34.19	1.89607	1.39311	1.20503	0.267958	1.19623	1.42158	1.37658	1.40604	1.36822	1.07905	0.00106015	0.00846146	0.710477	0.600118
Rpe	1	70.6814	65.1254	43.3786	12.0656	59.4674	47.5682	69.2048	65.662	66.8197	42.9624	34.4933	35.9703	32.6773	30.125	34.4887	31.6305	41.9219	47.5234	45.0813	49.0799	2.04913	1.81053	1.32748	0.400518	1.72426	1.50387	1.6508	1.38168	1.4822	0.875355	0.00356976	0.0162428	0.946214	0.229967
Sh3bp2	1	76.1329	90.1149	48.3995	7.36981	27.0798	21.5223	80.0744	97.6389	80.54	111.499	46.9016	45.4777	25.8949	26.6338	17.3349	16.587	48.2639	53.9138	63.5412	58.1265	1.62325	1.98152	1.86908	0.276709	1.56215	1.29754	1.6591	1.81102	1.26752	1.91821	0.00435537	0.0130488	0.354479	0.628856
Slc35a2	1	50.695	28.4819	16.5341	7.46577	26.5883	19.3316	23.8825	20.4516	13.8921	28.4503	11.5621	11.1824	9.63944	10.932	9.00567	11.6824	8.78894	7.89749	11.465	10.3313	4.38457	2.54703	1.71526	0.682929	2.95239	1.65476	2.71734	2.58963	1.2117	2.75379	0.00181074	0.0428015	0.341025	0.119431
Srp9	1	157.618	132.81	69.2016	18.3316	110.509	46.8427	42.6349	49.0404	35.5323	33.5073	77.2814	59.1957	60.9433	55.0301	46.001	58.6744	33.0929	38.1624	35.1892	36.7209	2.03953	2.24357	1.13551	0.33312	2.40233	0.79835	1.28834	1.28505	1.00975	0.912484	0.000333876	0.017978	0.851107	0.342576
Sumo1	1	114.125	117.962	169.753	23.5297	120.75	108.226	94.0875	137.642	133.783	97.7466	48.2941	46.8591	48.138	55.3008	50.24	49.3712	54.7048	61.3259	53.0985	51.9838	2.36311	2.51737	3.52638	0.425485	2.40347	2.19208	1.71991	2.24444	2.51952	1.88033	0.0369235	0.0496164	0.775982	0.819058
Tmem167	1	233.339	216.367	122.082	44.0997	175.869	239.461	153.848	94.3795	119.67	67.7832	121.499	115.269	108.265	97.2855	122.311	108.216	88.476	72.8301	81.8189	76.9253	1.9205	1.87706	1.12762	0.453302	1.43788	2.21282	1.73886	1.29589	1.46262	0.881157	0.00315047	0.00707397	0.67649	0.239431
Ubc	1	70.9372	72.8441	27.2593	15.9288	25.6064	40.16	81.2423	96.5879	136.673	164.104	43.1702	41.1716	41.1329	30.0401	20.2662	17.2211	71.8357	67.8347	121.815	103.332	1.6432	1.76928	0.662713	0.53025	1.26351	2.33202	1.13095	1.42387	1.12197	1.58812	0.000757819	0.00123206	0.327959	0.720846
Ube2r2	1	42.5169	59.8593	19.0817	10.7139	31.1853	26.956	39.1424	26.8096	23.0033	29.5804	42.2117	36.9635	35.9696	36.4853	30.5861	28.1372	29.431	34.6921	39.6071	45.5601	1.00723	1.61942	0.530495	0.293651	1.01959	0.95802	1.32997	0.772789	0.580787	0.649261	0.00030078	0.00465607	0.942092	0.0734035
Vdac1	1	198.518	226.833	170.659	18.7594	155.166	131.38	116.006	147.506	105.583	134.848	75.7425	76.4138	68.5131	57.4795	56.3425	59.3765	51.5389	60.5439	44.2032	45.2839	2.62096	2.96849	2.49089	0.326367	2.75398	2.21266	2.25084	2.43635	2.38858	2.97783	0.000361977	0.00179812	0.883215	0.78633
Ykt6	1	146.16	110.276	86.1778	27.8722	95.2747	90.5533	39.4793	42.6075	74.0913	31.0968	81.9101	76.7272	70.4629	59.977	63.2369	62.9788	37.6389	42.294	41.2875	38.9165	1.78439	1.43725	1.22302	0.464715	1.50663	1.43784	1.0489	1.00741	1.79452	0.799066	0.0185893	0.0345824	0.166011	0.478532
Crkl	1	115.22	71.892	51.149	5.44398	29.6205	59.3535	183.035	167.773	84.4169	149.562	21.3315	21.836	14.1075	9.92563	17.7353	18.1991	39.7872	42.596	35.0828	36.4967	5.40141	3.29237	3.62566	0.548477	1.67014	3.26134	4.60034	3.9387	2.40622	4.09797	0.00689836	0.235354	0.00786425	0.125343
March5	1	61.6647	63.6843	25.8911	21.701	11.3304	40.2545	219.201	196.782	164.514	164.54	51.6269	44.4348	48.7817	43.6187	76.8543	68.1727	280.428	288.583	291.434	259.893	1.19443	1.43321	0.530754	0.497516	0.147427	0.590478	0.781667	0.681891	0.564498	0.633109	0.00323481	0.2574	0.0210363	0.577923
Aes	1	226.16	175.608	128.577	26.1486	85.8119	108.964	53.6751	44.7694	65.4994	41.445	256.853	192.276	195.191	192.275	163.909	167.281	74.7348	104.387	62.8122	67.9824	0.880503	0.913313	0.658722	0.135996	0.523534	0.65138	0.718207	0.428879	1.04278	0.609643	0.00965333	0.221601	0.679859	0.0248956
Agpat3	1	42.0973	45.931	34.6626	7.82572	43.7408	16.5309	17.8814	17.4181	38.8318	26.3543	29.2038	27.482	25.1182	23.2302	21.567	23.2668	20.8912	24.5953	24.4647	23.3984	1.4415	1.67131	1.37998	0.336877	2.02813	0.710493	0.855929	0.708187	1.58726	1.12633	0.00712125	0.0680372	0.0693697	0.0108527
Ppm1h	1	33.7261	27.598	34.081	5.85157	11.164	26.4873	15.1442	20.3949	37.5911	46.6722	24.5663	23.6349	24.5698	24.8263	17.7751	20.6022	20.6056	25.6239	35.8182	38.3226	1.37286	1.16768	1.38711	0.235701	0.628071	1.28565	0.734956	0.795931	1.0495	1.21788	0.0118144	0.133383	0.452913	0.0381015
Xpr1	1	35.8463	29.6148	22.4487	8.18614	16.3362	16.1574	7.87819	7.97439	10.5052	6.94205	25.8348	26.176	26.257	23.9318	20.2439	20.5095	12.3782	11.7899	7.87636	7.4533	1.38752	1.13137	0.854961	0.342061	0.806969	0.787799	0.636455	0.676374	1.33376	0.931406	0.00597073	0.141138	0.325616	0.00729246
Casp4	1	13.2185	13.1192	36.5317	5.25941	51.8995	59.1332	226.359	212.061	195.732	261.134	8.16972	10.2233	26.039	29.8461	48.3458	55.3275	120.701	138.594	159.335	172.61	1.61799	1.28327	1.40296	0.176218	1.07351	1.06879	1.87537	1.53008	1.22843	1.51285	0.00402544	0.0410173	0.0482595	0.35488
Lrp12	1	43.7104	45.5835	57.6267	20.0126	55.2496	44.0025	6.03881	6.97228	8.66021	10.2083	33.1838	38.8301	53.1935	52.4442	42.0439	39.9721	8.87528	8.83433	12.4596	11.5878	1.31722	1.17392	1.08334	0.381598	1.31409	1.10083	0.680408	0.789226	0.695061	0.880951	0.0214887	0.0296295	0.0348622	0.447977
Hist1h3i	1	203.204	212.765	130.072	33.0206	152.324	151.146	58.3453	36.8706	31.1672	26.719	73.7343	63.4245	61.8763	58.7726	63.5205	73.8296	22.0533	28.8051	5.70867	5.48153	2.75589	3.35462	2.10213	0.561836	2.39802	2.04722	2.64565	1.28001	5.45962	4.87437	0.00283349	0.0316806	0.637927	0.00790077
Nek7	1	124.5	151.048	110.537	24.5101	87.2893	95.1984	107.049	88.1245	36.4862	50.8282	77.5176	91.8208	85.7123	79.2645	68.8857	76.358	53.2245	66.6614	47.8559	54.4618	1.60608	1.64503	1.28963	0.309219	1.26716	1.24674	2.01126	1.32197	0.762419	0.933283	0.00255474	0.0252408	0.247315	0.00761505
Acvr1b	2	20.5295	23.911	11.3268	25.2197	8.34832	5.55208	14.8181	10.9608	72.1972	44.3568	11.891	13.2881	8.57278	7.42774	6.61041	8.56886	9.24558	8.54783	29.8714	27.6249	1.72648	1.79943	1.32125	3.39534	1.2629	0.647936	1.60272	1.28229	2.41693	1.60568	0.548104	0.0266229	0.0758242	0.208365
Atg9a	2	10.8081	6.85081	13.3952	22.8779	8.31393	7.87418	13.145	11.1913	21.7197	19.3957	10.8461	8.30943	9.77482	11.3723	11.6545	12.0549	11.846	12.1382	18.053	16.4832	0.996494	0.824462	1.37038	2.01173	0.713365	0.653195	1.10965	0.921992	1.20311	1.1767	0.0566201	0.0110365	0.118528	0.372237
Bbip1	2	93.2183	71.0892	73.8962	146.814	61.0001	21.0086	31.6295	17.5954	36.4251	13.6616	43.9672	45.7099	43.6521	37.8929	36.8412	34.4602	22.9375	34.077	27.3771	30.6328	2.12018	1.55522	1.69284	3.87445	1.65576	0.609649	1.37894	0.516341	1.3305	0.44598	0.298661	0.021476	0.529381	0.816007
Bnip2	2	56.3339	60.6506	73.1327	92.6897	39.4969	40.3284	49.3704	55.7578	56.3262	57.8615	84.3124	97.3368	79.0971	79.8049	70.3901	80.3157	72.9742	80.1156	91.9256	92.9197	0.668157	0.6231	0.924593	1.16145	0.561114	0.502124	0.676546	0.695966	0.612737	0.622705	0.102108	0.0420362	0.356779	0.983577
Bola2	2	127.307	72.2888	94.5755	162.693	47.604	53.8691	59.4645	31.3858	7.10647	35.0303	189.195	132.082	139.388	134.148	140.121	139.596	80.6264	97.6596	68.3362	62.2284	0.672887	0.547304	0.678504	1.21279	0.339734	0.385892	0.737532	0.32138	0.103993	0.562931	0.164159	0.00461451	0.2371	0.846594
Ccdc107	2	57.9701	39.2965	35.9464	44.6356	10.2363	20.7377	16.6893	22.9264	5.03375	30.2073	24.4177	23.287	18.7062	22.0561	13.934	20.3476	13.9579	14.2608	10.3486	11.6088	2.37411	1.68749	1.92163	2.02373	0.734628	1.01917	1.19569	1.60765	0.486418	2.60211	0.963702	0.0290498	0.0733623	0.908774
Ccnb2	2	55.4426	35.091	35.2432	79.3887	20.8537	35.2803	29.6967	24.4829	22.9386	13.4376	32.6393	23.7339	20.1087	17.4468	21.2306	19.9914	16.8321	19.9807	10.243	11.4817	1.69864	1.47852	1.75263	4.55033	0.982244	1.76477	1.7643	1.22533	2.23945	1.17035	0.089011	0.0422165	0.530021	0.815485
Cdkal1	2	76.5282	29.7112	32.0314	133.063	48.29	13.305	14.8717	37.1444	17.9421	13.4587	36.4325	43.6923	38.6639	35.476	30.7545	32.5596	22.0272	21.5271	15.0718	14.7	2.10055	0.680009	0.828457	3.7508	1.57018	0.408634	0.675151	1.72547	1.19044	0.915557	0.2263	0.0446121	0.364211	0.828373
Cmpk2	2	26.613	36.2589	21.1334	35.4266	146.676	180.604	2810.27	3135.68	2168.88	2070.1	12.6084	8.57514	9.24606	9.04571	116.452	130.656	1745.48	2090.1	1372.53	1373.69	2.11074	4.22838	2.28567	3.9164	1.25953	1.38229	1.61003	1.50025	1.5802	1.50696	0.850443	0.0351643	0.417082	0.985048
Cog7	2	25.6184	23.3695	28.4744	39.2435	13.8021	13.0232	12.8515	18.5425	11.0641	10.5013	14.4071	12.8873	11.5737	11.7169	9.289	11.4189	8.53137	9.8246	6.88325	6.1392	1.77819	1.81337	2.46027	3.34931	1.48585	1.1405	1.50639	1.88736	1.6074	1.71054	0.154188	0.0403014	0.266615	0.894679
Dcps	2	30.672	22.5402	38.514	46.9543	5.59125	33.7728	11.3533	20.8421	7.19107	6.16476	17.1978	18.1457	16.7613	13.3763	10.5653	10.885	9.285	10.7944	6.51756	6.57748	1.78348	1.24218	2.2978	3.51026	0.529208	3.10268	1.22276	1.93083	1.10334	0.937252	0.0570864	0.028533	0.345608	0.157057
Dnajb1	2	72.1262	45.3766	40.1427	87.8922	28.983	9.14999	21.119	23.6869	42.906	53.551	34.0522	32.6652	27.416	25.8733	14.7252	16.9312	12.127	16.4349	32.0808	34.442	2.11811	1.38914	1.46421	3.39702	1.96826	0.540422	1.74148	1.44125	1.33744	1.55482	0.39928	0.0468169	0.103799	0.73203
Echs1	2	52.9039	54.7052	57.3201	35.9269	8.55003	20.7858	12.2805	13.927	10.5113	15.7695	26.8459	29.6041	23.021	19.3496	14.1453	16.3448	9.87866	11.9116	7.76088	7.58217	1.97065	1.84789	2.48991	1.85672	0.604441	1.27171	1.24314	1.1692	1.3544	2.07981	0.6847	0.0159015	0.206238	0.183492
Exosc8	2	70.8601	51.1945	70.9546	105.728	49.1586	15.1292	20.7071	24.1357	28.4173	9.83833	31.2682	27.8763	24.3219	19.8789	23.0866	19.8531	13.6959	17.1459	6.62015	7.20173	2.2662	1.83649	2.91731	5.31857	2.12931	0.762061	1.51192	1.40766	4.29255	1.36611	0.0620505	0.00411152	0.553355	0.129491
Fam219a	2	21.7291	11.1907	23.623	37.5467	7.835	38.3772	16.0861	26.1155	10.9166	28.0756	6.89633	6.91131	7.20136	8.22277	13.6369	9.88953	8.31854	12.3093	14.1574	16.5945	3.15082	1.61918	3.28036	4.56619	0.574542	3.88059	1.93377	2.12161	0.771083	1.69186	0.132018	0.0170501	0.150568	0.0660274
Fbxo7	2	15.2476	24.0691	16.5128	47.8806	8.88125	11.7818	13.8927	18.9762	13.7492	14.439	12.5944	12.4974	11.6096	10.7606	9.66123	10.3587	12.3397	12.8193	14.2547	13.8039	1.21066	1.92592	1.42234	4.44962	0.919267	1.13738	1.12586	1.48028	0.964539	1.04601	0.127865	0.0180086	0.353497	0.411001
Galk2	2	53.426	85.6735	45.0772	100.533	24.7549	28.718	28.8037	25.1797	35.3989	13.4226	37.0457	41.633	33.2911	31.5913	27.0771	27.5408	22.4786	24.9277	20.4058	19.1697	1.44217	2.05783	1.35403	3.1823	0.914237	1.04274	1.28139	1.01011	1.73475	0.700198	0.507537	0.0368231	0.504136	0.89434
Med6	2	47.6467	30.5368	23.3674	81.6448	16.6288	17.9992	21.9476	26.7236	24.824	42.0301	14.4499	18.4552	12.773	14.9131	11.6288	14.7741	12.6108	16.1123	12.4019	14.7642	3.29737	1.65464	1.82943	5.47471	1.42997	1.21829	1.74039	1.65859	2.00163	2.84677	0.36157	0.0271304	0.278857	0.26847
Ndufb4	2	78.5012	73.681	44.4224	150.645	27.096	12.4426	18.6265	22.1448	47.1914	7.07984	50.4679	34.444	32.7912	25.4893	30.9495	25.651	22.675	24.544	20.7598	15.3838	1.55547	2.13916	1.3547	5.91012	0.875493	0.485073	0.821455	0.902248	2.27321	0.460213	0.198761	0.000163288	0.400248	0.386573
Nol11	2	24.0756	18.1361	19.9626	35.3146	11.4884	14.7159	20.8824	17.4411	10.1096	8.84733	14.0656	15.0182	12.2266	11.4921	12.8801	13.8537	12.8216	12.6818	7.39353	6.32536	1.71166	1.20761	1.63272	3.07295	0.891954	1.06224	1.6287	1.37529	1.36736	1.39871	0.164891	0.0225203	0.0717444	0.748042
Osbpl3	2	14.9544	15.9376	9.59529	29.0387	7.40104	7.70346	11.5049	11.3857	8.24954	7.2195	9.46134	11.4156	10.7631	11.0827	9.54412	10.9263	12.2087	13.8222	6.945	7.15226	1.58058	1.39613	0.891501	2.62019	0.775456	0.705036	0.942353	0.823726	1.18784	1.0094	0.86438	0.0423977	0.556791	0.216855
Pdha1	2	38.0132	54.7421	42.6315	45.8785	28.0546	14.4287	31.8441	22.011	20.3261	20.441	27.9389	32.1147	24.4792	22.8363	21.5071	22.7528	18.7652	21.2554	19.9432	18.7612	1.36058	1.70458	1.74154	2.00901	1.30443	0.63415	1.69698	1.03555	1.0192	1.08954	0.480736	0.0497456	0.125568	0.407985
Pet100	2	200.135	227.741	220.58	328.68	106.449	95.9858	75.3574	82.6242	48.5397	38.1444	94.1824	82.9728	71.1563	67.9964	59.2576	61.785	49.4883	54.3902	45.4242	49.2376	2.12497	2.74477	3.09994	4.83379	1.79637	1.55355	1.52273	1.5191	1.06859	0.774702	0.168568	0.0361773	0.84654	0.0532296
Plekhj1	2	69.9776	55.5709	27.8373	87.7683	24.0854	13.5179	18.838	25.731	26.1009	28.7689	52.6631	40.4684	39.5196	38.5326	31.5995	32.4535	20.6784	26.1724	25.7994	26.1206	1.32878	1.37319	0.704392	2.27777	0.762207	0.41653	0.911	0.983137	1.01169	1.10139	0.909413	0.0275235	0.0652706	0.464492
Plgrkt	2	53.0619	61.8019	60.5712	54.8218	23.8098	21.8671	46.4835	34.3395	49.7615	37.3271	16.4664	19.6901	12.9482	12.3417	11.832	12.8392	13.254	18.5864	19.4337	18.7671	3.22243	3.13873	4.67797	4.44199	2.01233	1.70315	3.50712	1.84756	2.56058	1.98897	0.325085	0.0316911	0.145611	0.457387
Pmvk	2	35.5372	45.5791	32.1151	35.2607	11.2122	13.7298	16.4427	18.6861	15.622	8.92827	27.7269	29.2471	22.6719	20.0901	15.9668	19.3474	18.4073	22.4591	16.1157	18.42	1.28169	1.55841	1.41652	1.75513	0.702218	0.709644	0.893271	0.832004	0.969361	0.484706	0.696612	0.0473055	0.608766	0.671325
Pop4	2	41.2389	46.3978	36.7633	60.5698	25.1134	27.313	50.1552	43.4635	44.1988	19.5374	19.6948	21.8862	14.8213	14.54	19.6461	21.5725	22.044	27.8584	19.48	21.2196	2.0939	2.11995	2.48043	4.16575	1.27829	1.26611	2.27523	1.56016	2.26893	0.920723	0.2095	0.0186985	0.0960827	0.199525
Psd3	2	18.0569	18.3605	29.0099	25.4052	12.0974	13.9525	23.0219	23.3713	12.9355	13.1056	28.5481	31.0138	30.823	29.101	28.3952	30.1392	34.0266	40.6496	18.7428	20.3704	0.632507	0.592009	0.941176	0.873003	0.426037	0.462936	0.676586	0.574946	0.69016	0.643364	0.182228	0.0277698	0.236718	0.300152
Rab24	2	39.8685	17.8323	28.383	45.6956	20.198	6.95626	13.3292	13.3168	30.1522	15.5093	26.9395	22.9074	23.7361	20.6899	17.2066	18.7751	18.0619	19.7619	26.1951	27.7624	1.47993	0.778454	1.19577	2.20859	1.17386	0.370505	0.737974	0.673861	1.15107	0.558645	0.197299	0.0205535	0.911493	0.478432
Romo1	2	253.26	240.796	132.661	298.377	57.1899	142.322	77.9174	112.814	100.247	67.7599	127.006	74.0674	99.7036	94.564	97.5332	89.6658	66.4323	66.5172	63.4127	59.6355	1.99408	3.25104	1.33055	3.15529	0.586364	1.58725	1.17288	1.69601	1.58086	1.13623	0.651527	0.0339963	0.0948406	0.879942
Rsad2	2	52.9604	73.036	71.3481	141.211	914.843	987.113	10249.4	9397.03	8055.67	8619.87	22.7141	11.7459	21.1044	22.8884	440.027	508.026	5365.57	5077.91	4425.64	4216.81	2.33161	6.21798	3.38072	6.16954	2.07906	1.94304	1.91021	1.85057	1.82023	2.04417	0.454882	0.0480282	0.998609	0.967817
Sav1	2	18.1	7.43607	14.2845	34.968	19.5524	17.0937	27.2952	22.9932	22.0035	18.5264	23.9	21.2369	27.6479	30.1016	53.8134	54.7179	63.7742	78.3531	43.8114	45.3484	0.757319	0.350148	0.516656	1.16167	0.363337	0.312398	0.427996	0.293457	0.502233	0.408534	0.184915	0.00742676	0.787411	0.0668643
Sc5d	2	127.236	89.7704	83.6541	117.126	40.2951	43.4725	69.8437	57.135	66.9663	59.5834	36.5359	37.9918	32.5741	36.6848	34.6543	32.3227	40.0329	35.2665	31.9396	28.6777	3.48248	2.36289	2.56811	3.19276	1.16278	1.34495	1.74466	1.6201	2.09665	2.0777	0.913731	0.0293363	0.187946	0.450375
Senp3	2	19.1637	13.9185	21.8757	28.6296	15.6114	6.69873	6.249	8.85853	6.41847	5.96096	31.376	25.4843	29.0271	25.205	27.2883	25.1354	18.7486	19.8122	17.2155	16.416	0.610774	0.546159	0.753631	1.13587	0.572091	0.266506	0.333304	0.447125	0.372831	0.363119	0.100522	0.0117451	0.574034	0.507777
Sgpp1	2	41.4394	75.6119	50.2747	62.2004	42.781	9.74525	11.1151	12.0486	11.2643	12.3726	57.2459	49.6657	39.8166	44.3896	30.2814	31.4857	11.6533	11.461	16.4656	14.9176	0.723884	1.52242	1.26266	1.40124	1.41278	0.309514	0.953812	1.05127	0.684111	0.829395	0.377324	0.0412521	0.0898788	0.416372
Slc24a5	2	23.7985	16.9295	24.8042	43.0223	16.2504	14.3914	21.2566	23.1021	29.1108	28.0756	7.44366	7.99738	9.28175	8.35648	10.3827	10.0982	16.9195	12.9504	18.7962	16.1949	3.19716	2.11688	2.67236	5.14837	1.56514	1.42515	1.25634	1.7839	1.54877	1.73361	0.29078	0.0222319	0.904137	0.681991
Slc35b4	2	58.1864	40.1215	49.0677	51.7151	18.0824	23.6954	11.9331	11.7038	11.0609	14.2235	27.3678	27.1605	22.133	22.4545	24.2588	17.7575	10.7698	10.8741	11.2475	9.04629	2.12609	1.4772	2.21694	2.30311	0.745397	1.33439	1.10801	1.07631	0.98341	1.5723	0.441394	0.0252203	0.637928	0.439466
Srsf3	2	107.925	66.02	94.2108	142.781	58.7545	47.8286	79.3098	95.523	78.1419	66.9895	82.1066	72.2896	86.8954	65.1146	85.7299	78.9831	91.3654	97.6303	78.5554	66.1352	1.31445	0.91327	1.08419	2.19276	0.685344	0.605556	0.868051	0.978415	0.994737	1.01292	0.267474	0.0120628	0.16142	0.490006
Srsf9	2	75.8924	80.9459	66.6405	121.807	49.1167	28.8698	36.7353	40.0472	24.6365	42.2407	63.2427	51.6201	39.2456	44.6578	33.2239	44.0723	26.3637	34.0878	30.3167	29.9034	1.20002	1.56811	1.69804	2.72756	1.47835	0.655056	1.3934	1.17482	0.812638	1.41257	0.14998	0.0334855	0.278986	0.624006
Stx2	2	29.8675	37.1464	29.6173	61.5795	12.1837	8.3922	20.7709	14.0575	27.5854	11.8242	41.7471	45.1388	38.5411	36.8397	26.9291	27.0828	30.2729	37.864	37.7137	38.4132	0.715438	0.822937	0.768461	1.67155	0.452436	0.309872	0.686122	0.371262	0.731442	0.307816	0.188238	0.00139687	0.519856	0.931333
Timp1	2	24.075	49.8967	23.1428	73.7585	8.52859	33.2891	35.1766	45.101	127.742	120.334	7.90898	8.30232	6.27109	8.51407	6.45214	9.09574	14.84	14.0689	41.7009	37.5007	3.04401	6.00997	3.6904	8.66313	1.32182	3.65985	2.37038	3.20573	3.06328	3.20885	0.371625	0.0242639	0.199264	0.75918
Tmem9b	2	94.0056	78.931	77.5011	157.925	36.6163	54.4784	42.0455	44.7825	88.7708	46.5793	65.3337	60.3816	58.9636	63.5195	56.8367	54.7595	45.8089	47.7613	57.5173	56.1567	1.43885	1.3072	1.31439	2.48624	0.644237	0.994867	0.917845	0.93763	1.54338	0.829453	0.36033	0.0206446	0.550417	0.307245
Trim30a	2	41.7521	36.1824	28.5965	55.6308	21.3695	27.0192	225.25	246.559	212.906	223.692	30.6985	34.3951	26.4753	29.8753	29.6497	37.6744	214.995	236.188	227.561	251.272	1.36007	1.05196	1.08012	1.8621	0.72073	0.717177	1.0477	1.04391	0.935601	0.890238	0.546821	0.0462391	0.126744	0.670958
Triobp	2	9.93064	12.3925	9.76157	19.7067	6.73049	12.4692	44.1101	44.4514	46.5649	45.9486	10.0681	10.1076	8.78864	8.12701	12.0221	15.1849	41.4173	52.8336	48.0581	49.5893	0.986344	1.22607	1.1107	2.42485	0.559844	0.82116	1.06502	0.841345	0.968929	0.926582	0.205552	0.012078	0.221058	0.797285
Ube2g2	2	49	72.7633	51.7243	103.959	18.6181	46.4117	16.9672	17.3898	22.235	28.5924	40.969	35.8964	35.2027	27.2669	26.829	26.5175	13.0212	16.1399	15.6468	12.5946	1.19603	2.02703	1.46933	3.81264	0.693957	1.75023	1.30305	1.07744	1.42105	2.27021	0.192252	0.0383735	0.656874	0.105509
Ubl3	2	140.737	105.314	115.603	184.078	35.0839	96.6639	42.1712	41.9252	20.9497	24.6947	125.019	119.512	126.453	109.835	103.046	89.7286	62.747	73.7462	55.5734	60.5741	1.12572	0.881199	0.914198	1.67594	0.340469	1.07729	0.672084	0.568507	0.376974	0.407677	0.455969	0.0272921	0.952389	0.329538
Xpot	2	21.6054	17.6748	23.0188	31.2373	12.8758	13.3556	6.99762	12.4092	9.49764	6.51371	23.1998	22.3683	21.9983	18.5829	21.4638	18.929	13.8179	13.8552	11.7294	10.6058	0.931277	0.790173	1.04639	1.68097	0.599885	0.705561	0.506418	0.895633	0.809729	0.614162	0.142633	0.0354942	0.933626	0.397274
Zdhhc18	2	21.8498	7.95272	9.87284	28.3901	14.1704	6.85882	8.59319	9.27954	8.00419	20.9286	9.24617	7.47092	6.82899	8.42599	9.54433	10.3536	9.25058	12.7596	12.7043	12.9631	2.36311	1.06449	1.44572	3.36935	1.48469	0.662461	0.928936	0.727261	0.63004	1.61448	0.31742	0.0405547	0.39063	0.168014
Zfp385a	2	30.9174	24.6031	22.5056	40.6484	5.27784	17.1383	11.1953	14.3539	18.9094	23.9782	13.2255	10.5179	9.70201	8.8152	6.10671	7.20994	8.1385	8.9285	9.40519	10.1371	2.3377	2.33916	2.31968	4.61117	0.864269	2.37704	1.3756	1.60765	2.01053	2.36539	0.312223	0.0339798	0.722777	0.162016
1110008P14Rik	2	59.4565	79.8369	111.927	99.3582	45.6354	55.6139	30.1161	56.7041	51.3564	25.1582	56.9416	49.9653	46.1392	36.9988	41.2421	50.2266	28.5742	31.1775	25.1383	31.0406	1.04417	1.59785	2.42586	2.68544	1.10653	1.10726	1.05396	1.81875	2.04295	0.810493	0.0453963	0.0320417	0.387093	0.720917
Agpat1	2	22.7602	27.2665	35.3344	61.9421	15.83	19.6971	17.8604	26.513	17.0756	31.107	38.9109	27.2775	28.1608	28.116	28.5421	32.0152	24.3519	25.1356	26.2342	26.6849	0.584929	0.999594	1.25474	2.20309	0.554618	0.615242	0.733427	1.0548	0.65089	1.16572	0.0127136	0.00280803	0.127414	0.618147
Borcs7	2	44.8801	20.743	26.5645	169.641	6.99253	15.4128	10.152	11.2951	5.84564	5.01135	8.70463	9.99242	9.76907	7.4102	7.71727	6.63636	5.81552	6.7974	6.59037	5.27083	5.15589	2.07588	2.71924	22.893	0.906088	2.32247	1.74568	1.66168	0.886997	0.95077	0.0330771	0.000174777	0.503017	0.108637
Brap	2	22.1895	8.46098	11.6095	43.3348	9.59381	5.35806	6.50234	9.8726	9.75439	6.0394	20.6872	21.4379	18.3032	17.0543	12.739	14.0567	9.56648	11.5029	11.1648	11.6142	1.07262	0.394673	0.634288	2.54099	0.753104	0.381175	0.6797	0.858267	0.873673	0.520001	0.0308699	0.0156034	0.231933	0.89525
Fam96a	2	68.3437	77.6154	95.3525	139.007	36.5084	26.4045	16.2627	32.6454	15.2602	31.888	125.324	141.4	121.808	104.502	97.4813	91.7406	44.4949	52.0245	41.4928	40.022	0.545334	0.548907	0.782812	1.33018	0.374516	0.287817	0.365495	0.627501	0.367779	0.796761	0.0297741	0.000428795	0.185968	0.0674238
Mlx	2	46.2544	44.5567	55.5792	105.822	17.7511	26.3352	24.7806	30.7217	74.1982	48.3181	23.823	23.4618	20.8337	17.7733	17.136	17.0826	13.1081	16.4714	18.7994	19.7936	1.94159	1.89912	2.66776	5.95397	1.0359	1.54164	1.89048	1.86515	3.94684	2.4411	0.0394642	0.00334918	0.0983657	0.10328
Mrpl20	2	113.41	117.091	164.647	226.869	62.6328	93.0246	86.5413	88.0734	73.6313	67.5062	108.535	100.447	84.5523	80.3747	78.3921	84.4356	68.4031	83.9764	68.001	60.9294	1.04491	1.1657	1.94728	2.82265	0.798968	1.10172	1.26517	1.04879	1.0828	1.10794	0.0198469	0.0113933	0.369652	0.96801
Pold4	2	36.5742	50.0363	35.2557	152.992	13.6762	33.913	9.92786	23.6693	34.2994	11.0266	37.9189	30.7113	29.1629	27.726	20.693	18.6828	11.9792	15.1075	11.4996	13.1835	0.964537	1.62925	1.20892	5.51801	0.660911	1.8152	0.828757	1.56673	2.98265	0.836392	0.0362833	0.0289314	0.825477	0.340988
Snapin	2	49.7433	44.5667	55.327	138.848	12.8773	59.1332	13.4553	14.8578	8.97103	13.4587	58.8992	51.9683	46.16	39.4315	41.6427	36.726	18.3243	21.3375	23.8967	21.6223	0.84455	0.857576	1.19859	3.52126	0.309234	1.61012	0.734287	0.696323	0.37541	0.622447	0.00726575	0.00247527	0.734964	0.593622
Brix1	2	59.6832	34.3279	44.2983	54.0316	9.50557	62.0588	29.7285	19.5507	20.73	15.55	12.0824	14.8585	12.1556	13.4248	15.3021	19.0769	8.19078	11.0665	5.3845	6.41026	4.93967	2.31031	3.64427	4.02476	0.621193	3.25309	3.62951	1.76666	3.84995	2.4258	0.658649	0.0078223	0.00975552	0.865459
Chmp6	2	52.2253	27.5172	29.8081	18.7535	6.59093	9.07974	14.0152	7.60457	21.4274	13.777	31.6309	30.4815	23.2893	22.3541	16.9467	19.0605	12.3755	14.2378	16.3755	14.968	1.65108	0.902752	1.27991	0.838929	0.388921	0.476364	1.13249	0.534112	1.3085	0.920427	0.662976	0.0224431	0.0396844	0.158331
Cisd1	2	103.54	126.871	53.1408	114.68	36.4657	18.6058	29.4124	42.0739	16.936	30.2476	38.7201	40.8976	35.7511	31.2698	25.9647	33.7926	23.6599	21.3643	14.9754	14.1939	2.67405	3.10215	1.48641	3.66743	1.40444	0.550586	1.24314	1.96935	1.13092	2.13104	0.659884	0.0125548	0.0412036	0.906626
Cldnd1	2	15.9853	25.033	25.0456	87.4348	19.5144	21.7973	36.546	45.6397	72.7505	58.1152	7.85875	7.05833	8.43488	10.0241	13.3315	12.893	15.6791	16.7326	16.1796	16.3228	2.03407	3.54658	2.96929	8.72245	1.46378	1.69062	2.33088	2.72759	4.49643	3.56038	0.0704016	0.00448523	0.0462453	0.193792
Ctdnep1	2	45.9064	62.1718	40.6225	87.1639	20.9583	32.172	55.7189	40.0722	57.5683	44.5242	59.8598	40.2045	56.7992	49.4555	76.7463	60.8778	58.3313	63.9778	61.8593	62.7143	0.766898	1.54639	0.715194	1.76247	0.273085	0.528469	0.955216	0.626345	0.930633	0.709952	0.81709	0.000746153	0.00329759	0.550045
Dynll1	2	277.09	198.977	268.581	200.654	62.1675	148.748	92.8485	86.8292	61.5447	61.5545	235.747	182.018	184.953	152.642	159.879	169.146	84.0974	100.625	86.0137	85.848	1.17537	1.09317	1.45216	1.31454	0.388842	0.879406	1.10406	0.8629	0.715521	0.717017	0.49688	0.00959565	0.0229924	0.346561
Eny2	2	98.5622	73.3663	122.38	109.805	23.2771	102.213	51.8441	68.8211	18.2431	28.6723	63.1117	66.3287	50.01	55.8035	47.6503	58.3668	32.0506	47.5693	23.1214	29.6297	1.56171	1.1061	2.44711	1.96771	0.4885	1.75122	1.61757	1.44675	0.789015	0.967688	0.125791	0.0175016	0.0352085	0.0638154
Ly96	2	60.2076	113.716	69.3473	113.174	18.2542	65.3826	80.1088	68.45	80.1161	130.005	30.2982	31.6752	23.4891	28.1757	34.6059	28.349	39.6497	35.4089	48.324	43.1974	1.98716	3.59005	2.95232	4.01671	0.527488	2.30634	2.02041	1.93313	1.6579	3.00956	0.405884	0.00221701	0.00957636	0.769511
Mtap	2	50.5487	40.2693	53.8555	70.1741	12.372	47.5807	26.5351	31.5234	12.9285	14.7778	24.3076	22.0998	20.7529	16.5669	17.802	20.9782	12.3146	14.0768	6.14462	6.01544	2.07954	1.82216	2.59508	4.23579	0.694979	2.2681	2.15477	2.23939	2.10404	2.45665	0.117737	0.00907851	0.015644	0.798082
Necap1	2	51.0875	56.6689	36.7183	43.6274	8.49031	33.627	32.9176	34.8985	19.9625	34.7022	31.6274	27.383	22.5331	22.3714	19.6474	20.4499	22.6296	28.0897	21.3779	19.4995	1.61529	2.06949	1.62953	1.95014	0.432134	1.64436	1.45462	1.2424	0.933788	1.77965	0.981505	0.0329776	0.0488506	0.98182
Pop7	2	42.4284	39.9019	53.3463	80.8845	11.3816	19.9557	34.824	46.5591	34.5995	27.8076	23.8092	23.1177	20.1615	26.3398	23.3913	28.8646	23.6188	28.4373	22.4675	21.5231	1.78202	1.72603	2.64595	3.07081	0.486576	0.691355	1.47442	1.63726	1.53998	1.29199	0.155279	2.62908e-05	0.000245391	0.682166
Ppp5c	2	39.0634	40.4424	40.4298	32.681	8.76422	26.1596	19.8575	19.213	14.6535	14.3941	22.6468	20.2441	19.1182	17.5996	15.913	17.6438	12.2259	14.4318	10.8516	9.97297	1.7249	1.99773	2.11472	1.85692	0.550759	1.48265	1.62422	1.3313	1.35035	1.44331	0.785513	0.0262417	0.0329739	0.835316
Scyl2	2	22.2989	13.9135	17.394	23.3897	6.25368	9.69204	18.3651	20.7444	26.7934	25.9107	12.0312	12.9794	12.2718	11.2735	11.7999	11.016	14.2614	16.621	16.8153	16.8386	1.85342	1.07197	1.41739	2.07475	0.529976	0.879814	1.28775	1.24809	1.59339	1.53876	0.506766	0.0079756	0.00981028	0.340045
Snrpd1	2	94.1535	137.229	148.303	172.151	87.1986	28.7625	67.2706	79.3537	46.2021	55.0113	88.9518	79.6734	75.6313	61.3972	59.2459	54.2178	45.964	47.7551	26.7817	24.3901	1.05848	1.7224	1.96087	2.80389	1.47181	0.5305	1.46355	1.66168	1.72513	2.25548	0.0847853	0.00872433	0.0260737	0.422897
Srsf10	2	72.5961	50.527	54.1633	47.3483	32.7348	7.69929	22.6564	38.6904	20.0237	12.8745	40.6595	34.4998	31.7019	28.234	28.7088	32.4911	24.3003	24.5539	14.1646	14.4091	1.78546	1.46456	1.70852	1.67699	1.14024	0.236966	0.932351	1.57573	1.41365	0.893495	0.844108	0.00115327	0.00267785	0.893788
Taok3	2	23.4048	32.3721	41.7797	54.1725	11.8311	15.4056	44.9208	50.1147	42.0012	52.9939	24.0574	27.8472	24.9066	25.1465	15.8673	17.3391	31.6326	39.6446	39.6248	46.7047	0.972871	1.16249	1.67746	2.15428	0.745628	0.888486	1.42008	1.2641	1.05997	1.13466	0.062309	0.0161824	0.033284	0.441847
Yipf6	2	55.1309	42.1963	32.7251	38.3434	11.1322	15.3358	41.6298	24.9749	7.75527	32.6882	37.5609	40.3313	32.5147	30.6326	35.5589	36.7291	44.8692	46.7293	51.774	49.3074	1.46777	1.04624	1.00647	1.25172	0.313063	0.417539	0.927803	0.534459	0.149791	0.662946	0.816653	0.000602255	0.0146939	0.0517335
Tpst1	2	18.8691	17.4422	10.6368	21.6611	8.23171	5.94005	42.6826	50.2021	52.4311	42.8412	22.2541	19.5609	17.2216	16.8418	19.8863	19.672	77.8946	87.9181	62.8414	64.6628	0.847895	0.891684	0.61764	1.28615	0.413939	0.301955	0.547954	0.57101	0.83434	0.662531	0.861099	0.00616058	0.222144	0.0444708
Acbd6	2	35.5587	40.4816	45.5759	103.282	16.7956	27.4762	27.7097	52.0801	39.4899	27.2712	24.155	21.7868	19.1037	20.3139	18.499	15.3967	15.0459	18.8316	15.0343	15.5209	1.4721	1.85808	2.38571	5.0843	0.907918	1.78455	1.84168	2.76557	2.62666	1.75706	0.0351817	0.0104077	0.0226082	0.627054
St3gal4	2	9.37838	12.1368	11.8951	30.1318	5.2603	7.85054	14.7535	15.679	12.8261	25.9182	27.6979	25.7031	28.1229	22.2172	21.5366	22.7556	24.2402	27.3495	38.8035	38.6027	0.338596	0.472192	0.422969	1.35623	0.24425	0.344993	0.608639	0.573283	0.330541	0.671408	0.045553	0.00598913	0.015763	0.868007
Col4a3bp	2	22.5005	17.5636	23.7822	33.0748	12.3868	5.4734	16.503	18.8759	7.8152	15.7027	14.106	15.8507	14.0057	12.8951	11.2327	11.8298	12.3448	13.4249	15.5917	15.6688	1.5951	1.10806	1.69804	2.5649	1.10274	0.46268	1.33684	1.40604	0.501239	1.00216	0.160134	0.00299539	0.0107542	0.0146529
Gpsm3	2	80.0715	108.758	77.102	81.5331	33.913	16.4148	23.5899	19.0355	19.1559	13.9587	29.9077	16.2164	19.0392	20.2709	16.9682	18.1885	6.64975	10.1249	9.40077	11.0277	2.67729	6.70668	4.04964	4.02217	1.99862	0.902483	3.54748	1.88007	2.0377	1.26578	0.927065	0.00683749	0.0158755	0.0453091
Mpv17l2	2	41.5696	68.4462	38.5552	128.649	13.1154	19.0717	25.9656	23.5394	9.13689	14.3603	21.7139	17.3538	15.0014	15.2752	11.6732	14.9829	9.54107	10.6245	9.02172	7.97439	1.91442	3.94417	2.5701	8.42204	1.12355	1.27289	2.72146	2.21557	1.01277	1.8008	0.129072	0.000757079	0.00570344	0.0276286
Nelfb	2	27.3315	25.1635	15.3917	28.9268	6.43866	10.1371	15.1752	14.1503	11.5342	9.61336	26.1389	23.8891	20.2901	16.1399	16.8645	15.5193	14.4859	17.2054	21.2478	21.2	1.04563	1.05335	0.758582	1.79225	0.381789	0.653195	1.04759	0.822429	0.542842	0.45346	0.67863	0.0125183	0.0147545	0.0181805
Cdk2ap2	2	20.5023	35.2503	46.8074	110.044	18.3994	19.0104	17.4545	19.9023	52.8744	49.4489	21.473	17.4765	15.8545	17.8824	17.3997	17.0323	15.7704	17.9876	23.5892	22.8374	0.954794	2.01701	2.95232	6.15378	1.05746	1.11614	1.10679	1.10645	2.24147	2.16526	0.0021183	0.000731957	0.939948	0.0100809
Abca7	3	17.6021	9.62974	9.65928	7.78491	12.8953	10.0852	9.17479	7.05178	12.9138	14.8011	9.29818	8.80549	8.95103	10.3513	7.30481	7.89048	9.44829	8.96236	13.4482	12.7734	1.89307	1.09361	1.07912	0.752073	1.76531	1.27814	0.971053	0.786822	0.960266	1.15875	0.144519	0.106548	0.0254046	0.264663
Actr1b	3	40.1345	36.0759	42.1281	38.1875	50.8445	71.1133	20.4908	23.7343	21.0904	6.60628	32.9426	30.7692	38.3136	36.5261	41.2463	45.3749	28.6052	34.2996	20.1909	20.4231	1.21832	1.17247	1.09956	1.04549	1.2327	1.56724	0.716332	0.691971	1.04455	0.323471	0.779861	0.425054	0.00444601	0.798822
Akr1b3	3	64.2739	66.7257	65.8448	113.999	63.7826	64.3089	40.8718	51.1944	40.5705	35.6084	51.2593	42.7739	49.7882	33.8069	41.0546	32.8988	54.0606	40.1915	47.4474	31.1878	1.2539	1.55996	1.3225	3.37206	1.5536	1.95475	0.756037	1.27376	0.855062	1.14174	0.194649	0.639551	0.0229014	0.671125
Ano10	3	22.873	28.9623	27.9163	17.6177	28.5636	24.6768	10.5432	10.8924	10.1181	9.54143	14.6557	13.7816	13.5272	13.1607	10.2121	10.9646	10.4943	9.3268	12.1229	11.404	1.56069	2.10152	2.06371	1.33866	2.79702	2.25059	1.00466	1.16786	0.834628	0.836678	0.857422	0.241724	0.00249328	0.424358
Arl3	3	38.6467	34.9303	27.2321	14.067	28.0996	36.4983	11.1262	11.1158	23.4908	14.3844	9.53992	14.0223	10.1833	9.43279	9.28931	8.88945	7.81361	11.3519	9.71805	10.9396	4.05105	2.49105	2.6742	1.49128	3.02494	4.1058	1.42395	0.979204	2.41724	1.3149	0.250499	0.14639	0.000631813	0.178155
Armc5	3	6.41324	5.5674	7.21474	13.0692	10.7915	10.5574	7.9473	5.77445	5.8836	9.52735	8.61366	6.35012	5.52	7.76458	6.3197	6.25215	6.53133	7.5326	7.93379	6.8467	0.744543	0.876739	1.30702	1.68319	1.7076	1.6886	1.2168	0.766594	0.741588	1.39152	0.0573611	0.675375	0.0359328	0.570244
Bcl7b	3	41.2232	62.8745	32.3517	36.0331	48.4116	40.8117	22.4114	18.3411	33.2227	32.365	21.8055	19.7496	17.7986	17.4784	15.3059	13.4034	11.3795	14.8781	17.626	18.8534	1.89049	3.18359	1.81766	2.06158	3.16293	3.04487	1.96946	1.23276	1.88487	1.71667	0.602411	0.220512	0.033384	0.650703
Ccdc115	3	31.7842	52.0838	41.7797	56.7938	29.9829	27.9086	9.62589	7.4798	10.1616	7.98538	22.4679	18.6567	17.5776	15.3082	13.9921	12.9344	7.45645	7.37607	9.0601	6.93052	1.41465	2.7917	2.37687	3.71003	2.14285	2.1577	1.29095	1.01406	1.12157	1.1522	0.225084	0.430901	0.0436719	0.898041
Ccdc12	3	69.265	34.0507	46.7216	30.9416	73.2862	38.9243	15.15	20.3752	22.1444	15.0289	51.9602	43.2608	37.494	43.2256	27.8199	31.1073	18.9835	28.3248	20.3151	23.1027	1.33304	0.787104	1.24611	0.715817	2.63431	1.25129	0.798062	0.719342	1.09004	0.650527	0.813992	0.0547421	0.00097066	0.451876
Ccdc71l	3	31.959	43.3285	67.559	49.2154	85.6451	55.7916	35.9272	30.6408	41.6267	61.8553	23.9176	21.0832	31.4875	40.4554	31.9091	37.2331	25.2585	32.9735	35.4582	36.1861	1.33621	2.05512	2.14558	1.21653	2.68403	1.49844	1.42238	0.929257	1.17397	1.70936	0.99122	0.483901	0.0468955	0.320113
Cox7c	3	157.067	135.255	106.948	190.607	187.789	95.8147	76.4981	45.4738	58.1438	51.9224	195.463	119.899	168.34	151.417	144.441	134.018	99.0736	95.6791	102.183	66.7093	0.803565	1.12808	0.63531	1.25882	1.30011	0.71494	0.772134	0.475274	0.569017	0.778338	0.90551	0.762514	0.0453586	0.271007
Csk	3	61.234	48.7002	49.2376	45.8548	49.2508	48.6545	28.2254	22.8049	60.9467	60.0856	53.1082	50.786	42.647	42.4737	32.3572	31.8231	27.8652	34.5329	53.8613	50.6091	1.153	0.958929	1.15454	1.0796	1.5221	1.5289	1.01292	0.660381	1.13155	1.18725	0.804577	0.336291	0.0110062	0.0654936
Cyb561a3	3	13.9364	32.1071	16.3166	24.3129	39.0844	32.3059	17.8566	16.6506	12.5669	9.69603	9.64011	10.1612	7.62685	7.27257	8.77692	7.60896	9.09732	7.27993	8.55632	8.67272	1.44567	3.15979	2.13936	3.3431	4.45309	4.24577	1.96284	2.28719	1.46873	1.11799	0.481185	0.210889	0.0450814	0.0500541
Cyth2	3	19.5186	21.651	12.3782	28.5274	19.7062	28.6557	14.6905	10.5263	10.6776	8.17297	21.957	19.9905	21.3996	21.9006	17.3444	20.4132	16.2407	19.4143	15.9157	16.9278	0.888946	1.08307	0.578433	1.30259	1.13617	1.40378	0.904548	0.542195	0.670886	0.482813	0.756647	0.262561	0.0165893	0.733959
Ensa	3	53.3059	52.9703	76.0621	57.0888	94.6804	80.6624	43.5731	37.3721	20.8293	39.0612	66.2625	68.5259	62.5194	72.6114	60.3189	67.7159	45.8529	57.7992	51.5704	60.3163	0.804465	0.772997	1.21662	0.786223	1.56966	1.19119	0.950281	0.646586	0.403901	0.647606	0.488361	0.291273	0.0262673	0.325455
Gamt	3	59.4565	27.4801	40.2197	56.6009	53.7289	68.9129	28.9363	22.0891	28.3955	21.0234	23.9954	17.4403	17.483	18.7091	15.0608	15.541	12.1849	15.2814	9.07322	9.13126	2.47783	1.57567	2.30051	3.02531	3.56747	4.43426	2.37478	1.44549	3.12959	2.30236	0.373768	0.302248	0.0257076	0.321034
Gins4	3	50.2057	26.5503	42.6499	43.2503	49.7716	48.7179	15.5585	18.8902	32.8486	9.9735	34.7093	34.8343	30.5779	26.4024	21.5664	23.3546	12.3996	16.6098	9.50043	11.1544	1.44646	0.762188	1.3948	1.63812	2.30783	2.08601	1.25475	1.13729	3.45759	0.894129	0.247362	0.297114	0.0361024	0.217384
Gpr65	3	62.7531	47.9623	61.7333	90.2515	22.3207	27.7926	5.09886	6.93363	8.97103	5.76802	45.1763	53.3071	45.5288	57.7999	14.0592	18.3939	6.60816	8.04185	8.5671	8.89779	1.38907	0.899736	1.35592	1.56145	1.58762	1.51097	0.771601	0.862193	1.04715	0.648252	0.381572	0.824499	0.0198082	0.74017
Hnrnpf	3	29.2025	33.0822	19.3865	54.9562	29.2742	32.1667	11.2693	20.5071	17.4805	5.30744	47.0642	32.3314	45.4851	29.2243	38.7104	29.066	29.1691	22.7289	25.7937	16.6962	0.620483	1.02322	0.426215	1.88049	0.756235	1.10668	0.386344	0.902248	0.677706	0.317882	0.694544	0.896317	0.0407552	0.744227
Lat2	3	328.303	170.616	187.874	205.196	160.22	142.819	31.0981	25.9307	27.2731	22.0818	217.007	251.354	210.166	204.597	166.347	172.847	50.6732	57.4689	56.0694	49.6556	1.51287	0.678785	0.893934	1.00293	0.963167	0.826278	0.6137	0.451213	0.486418	0.444699	0.87279	0.902975	0.0141077	0.773963
Mcur1	3	16.055	19.5052	11.6363	29.4761	16.724	28.9466	11.0366	20.2855	14.3395	18.0552	8.24987	7.58692	8.82873	8.19956	7.17531	8.20122	9.25745	10.7624	10.936	10.0079	1.94609	2.57089	1.318	3.59484	2.33077	3.52955	1.19219	1.88485	1.31121	1.8041	0.951287	0.481281	0.0438581	0.855503
Mpdu1	3	147.616	200.131	159.145	209.24	150.645	174.262	88.7905	49.0924	105.749	87.5657	97.1706	90.9041	96.8179	90.0744	79.4244	82.6812	59.7241	57.8246	68.8549	54.6764	1.51915	2.20156	1.64376	2.32296	1.89671	2.10764	1.48668	0.848988	1.53582	1.60153	0.753442	0.915138	0.0398879	0.146747
Mrpl28	3	82.7424	77.7909	53.7532	59.5	88.2921	44.4425	20.5426	27.4267	7.09719	11.1545	58.8194	58.9259	44.7374	46.5482	36.6722	40.286	25.3381	30.31	19.6112	18.2955	1.40672	1.32015	1.20153	1.27824	2.40761	1.10317	0.81074	0.904875	0.361895	0.609687	0.828464	0.408016	0.0109335	0.137228
Mrps12	3	40.9749	75.4081	49.6084	52.0961	73.1267	57.5658	21.3715	19.2853	13.0999	17.7812	40.1958	32.5819	31.3019	34.4153	26.964	36.2032	18.0235	23.3568	17.375	19.1562	1.01938	2.31441	1.58483	1.51375	2.71202	1.59007	1.18576	0.82568	0.753948	0.928222	0.880414	0.400098	0.00908402	0.845101
Ndufb7	3	117.456	92.4625	102.361	121.733	141.324	163.95	61.7084	71.1085	71.0647	40.9322	125.863	110.871	109.971	105.385	99.8706	95.0404	75.2112	104.421	70.398	74.0118	0.933205	0.833961	0.930794	1.15514	1.41508	1.72505	0.820469	0.680982	1.00947	0.55305	0.563602	0.218769	0.00242287	0.711084
Ndufb8	3	210.65	237.343	186.815	203.133	206.535	161.487	98.2327	91.2403	97.2183	71.6752	217.237	198.259	187.095	172.534	156.333	169.901	120.341	145.193	108.916	96.8291	0.969679	1.19714	0.9985	1.17735	1.32112	0.950477	0.816286	0.628406	0.892598	0.740224	0.905161	0.867565	0.0419997	0.309992
Nubp1	3	39.9092	34.3313	33.4705	40.6377	54.3634	56.0114	33.7656	24.7734	28.643	23.3273	35.5862	39.843	36.2785	34.4148	37.2446	38.6925	30.6781	36.3748	26.1714	23.9061	1.12148	0.861665	0.9226	1.18082	1.45963	1.4476	1.10064	0.68106	1.09444	0.975791	0.795579	0.318953	0.0365761	0.292946
Nup50	3	26.1164	20.6486	30.0238	32.3456	23.9988	24.4737	6.99317	6.1133	5.21107	18.4278	19.8695	19.5474	18.6776	18.2018	15.8673	17.2549	9.40329	12.2292	13.2762	13.0794	1.3144	1.05633	1.60748	1.77705	1.51247	1.41837	0.743694	0.499894	0.392511	1.40891	0.250386	0.745359	0.000483688	0.0887462
Pdrg1	3	90.2411	69.6349	52.2525	72.6693	46.2146	56.0865	15.9753	26.661	9.19873	15.7718	23.8671	22.8374	14.7658	11.7875	11.3605	12.8164	7.98307	14.2943	10.0656	12.3616	3.78098	3.04916	3.53874	6.16496	4.06802	4.37614	2.00114	1.86515	0.913876	1.27587	0.394016	0.832495	0.0268673	0.0608198
Pdzk1ip1	3	13.7207	12.6831	15.6625	31.1177	52.5888	28.2719	18.6221	22.1987	21.4456	55.1545	9.19316	6.54618	7.54509	7.23958	6.62133	7.93103	8.62481	8.50132	8.05923	9.57543	1.49249	1.93749	2.07585	4.29827	7.94233	3.56473	2.15913	2.61121	2.66099	5.76001	0.138063	0.157616	0.0368169	0.212307
Pnpla7	3	22.8747	22.1754	18.1394	34.7308	13.4773	25.6959	7.61328	10.2008	7.21074	7.24409	17.7126	20.91	16.2522	18.9395	13.6842	14.4962	11.8383	11.024	8.05965	7.44726	1.29144	1.06052	1.11612	1.83377	0.984878	1.77259	0.643105	0.925321	0.894672	0.972719	0.480953	0.817737	0.0234246	0.170884
Ptk2b	3	63.9599	53.9259	65.1608	57.5157	53.523	61.7771	66.0604	76.2752	134.838	113.909	44.1459	42.9348	41.8818	38.591	28.4022	28.789	56.6982	67.9579	103.416	110.161	1.44883	1.256	1.55583	1.49039	1.88447	2.14585	1.16512	1.12239	1.30384	1.03402	0.658527	0.419201	0.03679	0.8318
Rnf126	3	30.7512	37.7984	25.2995	21.3623	42.4213	28.2567	12.9208	19.9009	19.4855	7.93464	18.3764	11.4199	14.7393	14.1223	12.1153	13.0716	10.105	13.5948	9.95017	9.46047	1.6734	3.30987	1.71647	1.51266	3.50147	2.16169	1.27865	1.46386	1.95831	0.838715	0.359716	0.142161	0.0202409	0.749906
Rpl37a	3	647.901	592.6	640.115	876.481	859.104	1095.68	397.599	500.212	552.972	345.544	895.57	672.279	717.842	514.438	656.252	532.883	546.174	497.782	483.95	347.955	0.723451	0.88148	0.891721	1.70376	1.30911	2.05614	0.727971	1.00488	1.14262	0.993069	0.132131	0.399539	0.0076637	0.166766
Rtfdc1	3	86.4467	68.1579	63.2072	71.7587	90.3201	72.0361	43.2919	49.9115	65.5712	54.0836	56.845	59.3587	53.13	54.4831	53.9024	54.6172	50.9333	56.2086	53.9832	46.2031	1.52074	1.14824	1.18967	1.31708	1.67562	1.31893	0.849972	0.887968	1.21466	1.17056	0.921133	0.573106	0.0263483	0.0930927
Scand1	3	96.3895	97.8421	70.5856	137.487	118.33	81.5064	58.5669	62.3793	55.4304	93.2111	95.4313	49.2848	39.9413	49.8208	36.4982	40.4854	43.1411	48.0485	52.878	57.9648	1.01004	1.98524	1.76723	2.75963	3.24208	2.01323	1.35757	1.29826	1.04827	1.60806	0.152864	0.664531	0.0281166	0.975301
Sem1	3	399.536	401.767	531.381	525.042	668.107	490.491	247.403	347.973	332.665	258.92	455.072	419.956	376.915	421.219	364.613	405.371	295.373	355.548	329.375	339.573	0.877963	0.956688	1.40982	1.24648	1.83237	1.20998	0.837595	0.978695	1.00999	0.762486	0.214098	0.678212	0.039992	0.895012
Serhl	3	26.8555	5.58553	12.1347	6.97886	24.9484	9.72712	12.7364	6.51741	5.90277	9.27726	9.3224	9.5562	7.61473	7.6995	6.03305	8.12268	7.62156	9.90054	7.43769	7.13057	2.88075	0.584493	1.59358	0.906404	4.13528	1.19753	1.6711	0.658289	0.793629	1.30105	0.883636	0.0961005	0.0130818	0.808371
Snap29	3	48.8694	52.5491	28.0825	42.9758	29.6483	49.3209	38.7623	46.4713	49.1034	65.1476	16.2486	17.2568	11.8257	13.5961	7.96622	12.1466	19.4016	26.4481	23.8287	29.4761	3.0076	3.04513	2.37469	3.16089	3.72176	4.06048	1.9979	1.75708	2.06068	2.21018	0.877498	0.386404	0.0415086	0.717088
Tmed2	3	98.0685	110.214	101.145	136.569	147.649	149.56	45.8529	49.2696	66.5564	44.0898	117.264	99.3232	112.558	93.6239	98.8171	99.809	69.3512	59.3557	72.6281	62.897	0.836306	1.10965	0.898608	1.4587	1.49416	1.49847	0.661169	0.830073	0.9164	0.700985	0.518577	0.404081	0.00312494	0.439058
Tmem208	3	79.8549	63.5096	75.6766	140.1	104.792	101.287	56.3282	40.953	45.9219	71.9222	62.9619	62.0124	54.3728	50.133	45.732	44.7207	40.5261	37.4164	36.3109	37.18	1.2683	1.02414	1.39181	2.79457	2.29145	2.26488	1.38993	1.09452	1.26469	1.93443	0.085832	0.667024	0.0339183	0.298275
Tmem222	3	37.5211	24.2785	22.8432	79.4222	44.1955	28.0261	13.4255	11.3317	14.6614	25.7663	26.3307	20.0495	19.3435	17.939	15.1099	16.342	10.7377	11.531	13.8068	12.457	1.42499	1.21093	1.18093	4.42735	2.92494	1.71497	1.25032	0.982714	1.0619	2.06841	0.100135	0.992314	0.0163855	0.196804
Tnks	3	8.84365	11.5538	13.0116	10.8455	11.1333	12.7558	10.4024	9.53874	11.5189	11.6524	9.48067	11.064	10.7395	9.85307	6.61256	6.83174	9.28465	10.8323	11.9271	13.1745	0.932808	1.04427	1.21157	1.10072	1.68366	1.86714	1.12039	0.88058	0.965774	0.884464	0.574593	0.205291	0.0270749	0.930428
Tspan13	3	33.1622	29.0038	28.1488	82.9234	33.6241	49.2776	16.052	9.90518	8.97103	14.7405	22.3993	19.554	20.3841	19.9424	17.574	18.5173	14.3683	15.1101	11.1716	12.7037	1.48051	1.48326	1.38092	4.15815	1.91329	2.66117	1.11718	0.655534	0.803021	1.16033	0.150425	0.901104	0.000775867	0.352336
Txndc15	3	40.6412	50.0903	42.3834	48.3615	41.7918	35.4741	14.7648	18.0213	24.7031	7.94155	31.2114	30.7845	29.6431	28.1541	18.5605	27.6804	16.471	17.1232	16.5385	15.0227	1.30212	1.62713	1.42979	1.71774	2.25165	1.28156	0.89641	1.05245	1.49367	0.528636	0.746029	0.767866	0.0319178	0.825192
Uqcrh	3	170.457	190.71	181.161	159.966	173.085	206.651	101.169	106.509	117.135	94.5106	152.97	133.299	126.664	109.56	107.983	114.727	98.8841	106.634	95.6545	96.5369	1.11431	1.4307	1.43025	1.46007	1.60289	1.80124	1.02311	0.998824	1.22456	0.979011	0.618757	0.623937	0.0493652	0.580948
Urm1	3	23.3437	66.1736	47.3729	70.5891	119.295	76.1587	21.1217	16.7856	36.4862	22.1559	27.7143	21.4496	20.5923	17.5957	18.3868	15.69	12.8717	9.64243	9.81314	11.3879	0.842298	3.08507	2.30051	4.01172	6.4881	4.85397	1.64094	1.74081	3.7181	1.94556	0.068712	0.13866	0.000281886	0.229855
Usb1	3	11.6816	5.39911	9.6307	19.1339	36.5831	18.8049	89.0018	98.2783	93.5744	103.698	16.5807	13.7475	13.2491	14.7802	26.3398	24.8895	132.513	151.706	123.709	114.41	0.704531	0.392734	0.726897	1.29456	1.38889	0.755536	0.671646	0.64782	0.756407	0.906372	0.0600773	0.869776	0.0290185	0.105854
Vps4a	3	30.9174	32.6464	18.5513	18.4286	23.3443	28.9434	14.5252	15.7759	11.1517	10.7551	21.8265	24.8493	21.1498	17.7089	18.0465	17.9832	16.5528	19.2447	16.3626	17.1614	1.41651	1.31377	0.877139	1.04064	1.29356	1.60947	0.877507	0.819753	0.681535	0.626705	0.311791	0.224894	0.0369252	0.525374
Vps53	3	34.9914	13.689	20.685	29.0507	25.5846	14.7259	11.68	11.1203	12.4521	20.408	12.1632	13.2164	11.79	10.9808	9.42044	9.92829	8.79095	11.6146	9.9743	10.3132	2.87684	1.03575	1.75445	2.6456	2.71586	1.48323	1.32864	0.957444	1.24842	1.97882	0.445118	0.899198	0.0367094	0.135477
Wbp1l	3	35.0378	22.1535	28.2641	27.5473	31.4442	21.6589	11.9318	6.80251	9.85756	31.6901	39.1432	31.6501	30.6353	33.8204	21.6196	24.6993	16.6576	17.1243	25.7497	26.209	0.895119	0.699951	0.9226	0.814517	1.45443	0.876906	0.716295	0.397243	0.382822	1.20913	0.752038	0.38263	0.00219585	0.0827562
Zfp24	3	11.2325	22.9725	7.47955	15.3908	12.6005	16.2737	7.79572	8.63217	8.22956	14.4628	14.8539	15.0053	9.12042	7.07573	8.20091	8.43678	8.18716	8.87349	9.09608	8.81878	0.756197	1.53096	0.820089	2.17516	1.53648	1.9289	0.952189	0.972804	0.904737	1.64	0.456934	0.484996	0.0387985	0.206592
Znrd1	3	42.3526	73.993	58.0156	17.6097	39.1965	17.9992	14.1092	12.334	24.824	27.6654	21.9549	17.9164	17.0307	18.0599	15.0117	13.1515	12.2955	15.0101	17.3407	18.7673	1.92907	4.1299	3.40652	0.975071	2.61106	1.3686	1.14751	0.82171	1.43155	1.47413	0.271898	0.810541	0.0275042	0.127879
Cebpg	3	22.379	46.7835	27.5111	91.0968	52.1403	62.5178	12.744	7.7984	24.2158	12.1098	27.3176	26.5009	18.9919	19.5749	17.5314	15.4118	5.29661	8.19156	8.47576	7.97804	0.819213	1.76535	1.44857	4.65375	2.9741	4.05648	2.40607	0.952004	2.85706	1.5179	0.0244684	0.458292	0.0112945	0.433955
Zfp706	3	51.301	85.3586	83.2869	157.715	67.1406	97.779	15.1913	17.7066	16.0367	18.9034	38.7145	23.0616	27.5054	19.8869	23.9031	20.6886	11.8807	13.0534	11.5214	10.7058	1.32511	3.70133	3.02802	7.93058	2.80887	4.72623	1.27865	1.35647	1.3919	1.76572	0.0281504	0.504246	0.00180453	0.540897
Cfdp1	3	38.7348	33.6897	30.1476	16.6378	29.6267	61.221	18.5739	21.0795	14.4477	22.5596	34.7386	43.793	33.4937	34.3539	30.7636	32.6619	24.7709	31.4181	21.1246	27.5571	1.11504	0.769296	0.900098	0.484307	0.963042	1.87439	0.749828	0.670936	0.683927	0.81865	0.276764	0.0321981	0.0100411	0.40541
Gosr1	3	36.5084	21.4056	33.34	12.6169	54.9966	45.1359	47.8769	39.1529	26.901	22.5376	16.6631	13.9346	11.2928	13.6134	13.4349	15.7326	24.1224	27.3514	16.2183	21.8811	2.19097	1.53615	2.95232	0.9268	4.09355	2.86894	1.98475	1.43148	1.65868	1.03	0.761058	0.0435872	0.035386	0.253024
Olfml3	3	47.712	27.5208	23.7222	12.504	25.6911	50.1391	10.8319	12.3509	8.94888	12.4665	15.883	18.6559	13.1841	14.5499	11.433	13.2893	8.27137	8.70311	6.85786	5.81894	3.00396	1.47518	1.7993	0.859385	2.2471	3.7729	1.30956	1.41914	1.30491	2.1424	0.134313	0.0196626	0.0148681	0.405638
Smim20	3	71.989	48.3327	11.5336	63.015	40.3784	76.1194	18.232	17.1641	17.7662	22.8459	28.4594	24.3435	25.0024	15.6669	13.997	21.0861	14.4782	15.9636	16.8877	17.2514	2.52953	1.98544	0.4613	4.02217	2.88479	3.60993	1.25928	1.0752	1.05202	1.32429	0.265805	0.0435952	0.00204326	0.801148
Tprgl	3	50.6204	53.4512	25.9288	26.4931	50.2335	48.8928	17.2959	22.6796	18.2584	14.1852	44.1809	41.9857	37.7397	38.2399	34.7958	35.7247	23.3818	26.539	22.2495	22.241	1.14575	1.27308	0.687043	0.692814	1.44367	1.3686	0.739717	0.854578	0.820623	0.637794	0.0878787	0.0318392	0.0209973	0.939001
Cgrrf1	3	17.9571	9.09342	13.6656	16.5262	13.1375	22.9246	7.8028	8.58949	23.7959	5.88454	17.8409	18.3267	14.651	16.5957	12.7062	15.9947	12.7084	10.8359	10.3992	10.8232	1.00651	0.496185	0.932739	0.995817	1.03394	1.43326	0.613987	0.792689	2.28825	0.543696	0.326722	0.492761	0.0274499	0.0403926
Dhdh	3	28.8292	15.1251	27.869	12.3697	24.4738	22.8783	6.34502	7.05944	18.2676	7.04721	14.5901	13.8784	12.613	10.8737	10.1134	10.0551	6.45739	7.06775	5.16892	5.35319	1.97594	1.08984	2.20954	1.13758	2.41995	2.2753	0.982598	0.998824	3.53413	1.31645	0.80555	0.269828	0.00289611	0.00692074
Gpat4	3	22.8004	27.1883	23.8582	61.1899	37.4069	14.9752	8.43961	13.6488	21.3823	14.6072	34.7948	37.4932	34.6756	31.414	33.2935	34.389	28.4005	27.8586	26.8243	26.1621	0.655283	0.725152	0.688041	1.94786	1.12355	0.435464	0.297164	0.489933	0.797125	0.558335	0.0810832	0.14322	0.0044005	0.00462262
Polr2f	3	92.5055	70.6882	101.686	45.0673	110.69	114.366	25.871	27.9373	28.9173	26.856	94.6018	72.7075	72.9125	66.8058	68.9628	69.3053	39.7859	52.6798	33.3471	29.2495	0.977841	0.972227	1.39463	0.674602	1.60507	1.65018	0.650255	0.530324	0.86716	0.918172	0.996219	0.113053	3.93593e-05	0.0174154
Ranbp3	3	38.7167	33.3741	27.689	14.4581	36.3679	29.1954	13.9857	11.1695	17.4981	14.7664	20.5291	21.2759	17.8436	18.5347	18.4432	17.9839	13.9125	19.2141	14.0219	14.0518	1.88595	1.56863	1.55176	0.780057	1.97189	1.62342	1.00526	0.581317	1.24791	1.05085	0.182447	0.133766	0.000669923	0.0437751
Sh3glb2	3	18.0502	31.1059	22.567	25.3417	31.4576	21.9172	8.59024	7.50943	7.55692	10.0415	20.1187	18.4128	16.0852	15.4938	12.8085	13.2066	10.0133	11.8868	7.65099	6.99729	0.897183	1.68937	1.40296	1.6356	2.456	1.65956	0.857882	0.631745	0.987704	1.43506	0.46371	0.405539	0.000153487	0.0187971
Slc35e1	3	40.5142	38.9718	24.5691	30.1492	36.927	23.4789	13.1218	7.37413	16.3257	13.0414	32.8824	25.5309	24.7375	25.3986	19.4038	22.976	13.1	15.2497	11.6798	11.7351	1.23209	1.52646	0.993195	1.18704	1.90308	1.02189	1.00166	0.483558	1.39777	1.11132	0.528703	0.4331	0.00580838	0.00815955
Smox	3	20.4055	20.9201	31.0577	12.6213	26.359	28.19	6.63759	15.6066	34.7933	25.167	31.6616	28.164	27.6701	26.0478	24.5101	25.4354	19.6085	23.6619	32.1434	29.5872	0.644486	0.742793	1.12243	0.484544	1.07544	1.1083	0.338506	0.659568	1.08244	0.850604	0.857112	0.196324	0.000201934	0.00041361
Zfp91	3	19.9467	25.6459	17.5947	16.1074	21.6133	11.2093	5.20187	7.33448	9.5656	8.42818	40.9573	44.6992	38.9361	36.3773	29.0586	31.4816	19.6175	22.7404	20.2763	20.9728	0.487012	0.573746	0.451886	0.442786	0.743783	0.356059	0.265164	0.322531	0.471763	0.401863	0.589817	0.595504	0.0119161	0.0499007
Ddx41	3	25.0817	23.1849	21.6325	6.3204	20.399	23.2567	14.3902	12.4444	21.5615	14.2833	23.8811	24.3851	20.0854	19.473	18.448	18.8812	18.0482	22.8964	17.3756	18.0478	1.05027	0.950784	1.07703	0.324573	1.10576	1.23174	0.797321	0.54351	1.24091	0.791413	0.0660305	0.0332521	0.0114193	0.0274424
Edf1	3	174.307	183.585	72.3543	42.5929	118.507	153.733	67.7783	62.6689	156.86	84.0457	96.4858	82.8818	69.892	77.5807	74.36	85.0629	78.725	89.7161	83.8595	80.524	1.80655	2.21502	1.03523	0.549014	1.59369	1.80728	0.86095	0.698525	1.87051	1.04373	0.00301286	0.0137681	0.00161593	0.00517286
Abcf2	4	48.7474	46.0538	34.2679	48.4071	30.8179	34.1556	44.4981	40.1025	22.2766	7.88799	27.6211	29.4331	22.3197	22.0198	22.3558	23.6905	23.7404	28.2379	20.8753	22.4037	1.76486	1.56469	1.53532	2.19834	1.37852	1.44175	1.87436	1.42017	1.06713	0.352084	0.691079	0.494879	0.461065	1.38539e-05
Acot13	4	94.5316	86.3547	74.7609	67.2599	70.6966	83.07	39.1076	51.5806	13.037	34.4605	28.2374	29.7137	20.6404	22.9932	24.0586	19.8835	9.19849	13.6896	7.20488	9.4945	3.34775	2.90623	3.62206	2.92521	2.93851	4.17783	4.25152	3.76786	1.80947	3.62953	0.857191	0.82206	0.393719	0.038291
Alg3	4	49.7521	41.0622	27.9458	17.0147	20.5971	29.2902	19.7312	21.0817	9.72034	12.7972	11.592	8.62814	8.97714	7.88298	8.16079	7.5001	7.75972	7.42765	7.64347	7.24759	4.29193	4.75911	3.11299	2.15841	2.52391	3.9053	2.54278	2.83827	1.27172	1.76572	0.18599	0.593401	0.934716	0.0200512
Anp32e	4	77.9934	70.9861	57.0712	86.1741	60.0109	84.9896	68.4722	71.8286	18.7545	27.6337	12.1651	13.4213	11.1346	10.6595	10.8821	12.8232	9.42815	12.6387	8.1362	8.45515	6.41123	5.28906	5.12556	8.08422	5.51467	6.62781	7.26253	5.68323	2.30506	3.26827	0.696586	0.904711	0.401586	0.000519933
Ap2s1	4	464.495	488.767	459.673	345.596	491.204	419.916	313.286	320.801	154.958	209.411	284.935	250.05	245.143	232.729	217.77	208.792	174.477	206.033	172.321	173.084	1.63018	1.95468	1.87512	1.48497	2.25561	2.01116	1.79557	1.55704	0.899242	1.20988	0.914631	0.462316	0.4951	0.0462026
Arl2	4	38.1522	68.1828	38.7124	30.9786	54.6874	61.1439	40.2741	34.7496	13.2515	14.9104	11.9592	11.0563	11.3642	10.5902	8.88826	7.9779	8.83559	9.31549	9.66692	7.29548	3.1902	6.16687	3.40652	2.92521	6.15277	7.66416	4.55816	3.7303	1.37081	2.04378	0.491806	0.0707493	0.375942	0.000526832
Atp5h	4	100.255	99.5493	102.137	206.59	48.07	102.456	53.8687	68.0204	18.9555	20.3127	142.329	104.613	121.71	82.8474	99.6142	75.5142	80.9684	73.4191	75.8442	60.8067	0.70439	0.951597	0.839187	2.49362	0.482562	1.35678	0.665305	0.926467	0.249927	0.334054	0.0597594	0.079043	0.900171	0.00055311
Birc5	4	109.499	90.5011	140.518	55.1858	127.652	101.2	71.5257	63.9159	20.135	16.1825	49.2896	47.1204	42.504	39.5345	40.73	40.6952	19.3919	26.7124	10.905	10.2995	2.22155	1.92064	3.30598	1.39589	3.13411	2.48678	3.68842	2.39274	1.8464	1.57119	0.898756	0.427046	0.580948	0.01369
Btf3l4	4	115.363	110.6	62.7093	51.0813	44.3705	110.79	62.2228	43.7285	27.047	17.3901	46.9005	47.911	31.2663	37.0544	30.7704	33.497	16.439	22.2197	13.9225	13.8017	2.45975	2.30845	2.00565	1.37855	1.44199	3.30745	3.78507	1.96801	1.94269	1.26	0.335242	0.456062	0.236613	0.0162796
Card19	4	244.834	224.213	217.736	337.894	224.353	221.08	123.293	123.441	36.7102	12.8745	140.2	106.759	128.422	123.328	151.361	140.642	90.5609	115.149	50.6088	50.8659	1.74632	2.10018	1.69548	2.7398	1.48224	1.57193	1.36144	1.072	0.725372	0.253106	0.64694	0.375252	0.409708	4.33909e-05
Ccdc59	4	32.3855	20.9555	23.0028	67.7355	25.4309	56.7216	32.3664	27.9448	20.2475	12.4759	14.7324	15.7259	9.90623	15.1349	13.0418	16.8914	9.69657	15.1431	11.8051	14.5701	2.19825	1.33255	2.32205	4.47544	1.94996	3.35801	3.33792	1.84538	1.71514	0.856266	0.0712108	0.587116	0.764861	0.00289218
Cdc123	4	104.871	46.962	60.2993	71.6454	49.6715	56.4231	31.6295	24.6335	7.28502	11.3196	41.7483	40.2742	39.0065	33.677	31.7223	29.8864	22.4749	22.1019	16.6678	15.6638	2.51197	1.16606	1.54588	2.12743	1.56583	1.88792	1.40732	1.11454	0.437071	0.722662	0.789527	0.908062	0.279684	0.00668479
Chmp1a	4	77.1605	38.3681	48.596	44.2515	47.7562	23.6431	36.4399	37.8818	18.7141	21.391	51.3706	44.6838	46.7746	41.6009	39.5826	39.3793	35.5849	38.3785	43.8513	36.452	1.50203	0.858658	1.03894	1.06371	1.2065	0.600394	1.02403	0.987056	0.426763	0.586826	0.854513	0.599427	0.555221	0.016221
Chp1	4	25.4079	43.759	37.6538	57.6233	29.2525	36.1653	38.609	23.3663	15.676	22.8459	33.5288	34.7926	26.611	28.9435	23.8995	22.4343	16.1925	16.0409	18.5048	16.5266	0.757792	1.25771	1.41497	1.99089	1.22398	1.61205	2.38437	1.45667	0.847132	1.38237	0.0886019	0.655563	0.205421	0.0491768
Coq5	4	8.72924	26.408	7.24698	8.99878	10.6826	19.0088	13.2183	12.8391	7.44209	5.98121	11.5856	14.2863	9.81869	10.203	8.39867	9.34484	9.17592	10.3059	10.3232	9.6138	0.753457	1.84848	0.73808	0.881974	1.27194	2.03415	1.44054	1.24581	0.720906	0.622148	0.319178	0.0618336	0.626708	0.0186686
Cox7a2l	4	100.716	71.4483	83.7759	118.635	43.3537	59.7245	32.0782	51.537	5.49136	14.1229	112.497	66.0057	81.6271	51.6029	83.4868	45.5283	45.2156	36.9194	43.9436	28.1848	0.895277	1.08246	1.02632	2.29899	0.519287	1.31181	0.70945	1.39593	0.124964	0.501082	0.151146	0.0695422	0.423561	0.000368537
Ctla2a	4	224.646	199.562	210.076	109.38	120.664	217.715	121.911	117.045	58.0245	65.0488	100.3	103.425	91.0801	80.4425	72.6108	90.5949	58.4813	52.7506	46.4725	51.2353	2.23974	1.92955	2.3065	1.35973	1.66179	2.40317	2.08461	2.21883	1.24858	1.26961	0.668391	0.691357	0.568463	0.0293841
Cuedc2	4	108.064	103.617	80.8445	74.7709	54.9626	60.8567	77.9664	49.1914	30.0593	28.0701	50.9614	50.1012	44.1911	41.4772	40.5065	39.7391	34.9946	40.6731	34.9331	31.7573	2.12051	2.06815	1.82943	1.8027	1.35688	1.53141	2.22796	1.20943	0.860484	0.883893	0.759751	0.562649	0.486173	0.0103368
Cux1	4	104.312	115.329	91.095	102.385	90.5439	72.4093	57.094	65.7358	36.0826	22.856	99.4275	97.3809	89.0046	91.1927	78.7093	81.8992	48.4054	66.6402	40.715	45.02	1.04913	1.18431	1.02349	1.12274	1.15036	0.884128	1.1795	0.986428	0.886225	0.507684	0.962758	0.916431	0.77616	0.0364155
Cyb5a	4	360.184	370.379	308.182	316.446	167.081	209.111	118.909	115.918	73.0337	37.1749	186.61	197.667	144.134	148.557	129.852	125.154	67.0535	80.8714	52.874	59.0454	1.93014	1.87375	2.13817	2.13013	1.2867	1.67083	1.77335	1.43336	1.38128	0.629599	0.672666	0.326325	0.596314	0.0194137
Dap	4	79.341	99.3651	107.125	181.875	155.04	85.0382	64.4205	51.3462	24.002	42.4388	12.9967	11.8852	10.8195	13.2287	15.3323	10.115	5.71555	11.0371	7.29554	7.6995	6.10471	8.36038	9.90108	13.7485	10.1119	8.40711	11.2711	4.65216	3.28995	5.5119	0.184643	0.644828	0.95347	0.0104438
Ddx23	4	18.9988	15.9815	15.4222	24.4165	10.1236	18.8398	22.5038	23.361	8.90856	10.0237	16.2805	18.6927	14.2021	13.7274	17.5781	18.1329	20.5538	22.8997	17.3464	17.3781	1.16697	0.854957	1.08591	1.77867	0.57592	1.03898	1.09487	1.02014	0.513569	0.576801	0.266521	0.0830517	0.17995	0.0102972
Dhfr	4	110.021	128.221	78.4285	49.483	28.1213	52.7297	27.3215	28.841	13.0605	5.59827	46.1158	45.8025	35.8987	29.4231	22.8042	28.3065	11.9565	15.4631	6.35172	7.07709	2.38576	2.79942	2.18472	1.68177	1.23316	1.86282	2.28507	1.86515	2.05622	0.791041	0.458082	0.554409	0.178066	0.0378059
Dnajb6	4	39.7755	23.8492	34.3602	17.8791	36.7813	19.1052	46.5564	57.0478	32.7649	25.3878	22.4045	26.26	30.4814	26.6708	31.878	34.8558	47.6937	50.0888	49.6421	47.5486	1.77533	0.908196	1.12725	0.670361	1.15381	0.548121	0.976153	1.13893	0.660021	0.533934	0.263491	0.886913	0.308958	0.0257726
Dtymk	4	181.867	201.736	187.833	179.224	198.553	42.6604	63.712	58.8484	22.8422	9.79108	98.6059	97.9249	80.0299	72.8092	68.4178	78.058	27.8819	45.0736	17.6731	19.1438	1.84438	2.06011	2.34703	2.46156	2.90206	0.546521	2.28507	1.30561	1.29248	0.511449	0.498696	0.0887075	0.183667	0.00724429
Dynlrb1	4	426.62	427.298	254.001	424.961	242.105	296.683	178.35	227.369	88.254	138.707	82.5672	66.8891	70.8976	61.4501	62.3896	57.4838	43.2147	60.0811	47.7328	48.0516	5.16694	6.38815	3.58265	6.91554	3.88053	5.16116	4.12707	3.78437	1.84892	2.88663	0.869369	0.815817	0.879467	0.0235333
Eif1a	4	41.2471	62.6623	100.993	31.1818	94.5532	170.443	104.218	121.861	71.4769	42.3523	34.5297	40.2707	51.959	45.0719	88.8113	78.1078	82.6782	78.7586	69.9873	60.3658	1.19454	1.55603	1.9437	0.691824	1.06465	2.18216	1.26053	1.54728	1.02128	0.701595	0.623267	0.400418	0.894048	0.0425315
Eif4e2	4	60.644	56.8732	73.0022	99.1928	72.9776	90.3109	50.6088	60.6533	36.1913	29.918	53.1918	62.2154	54.3427	55.8511	56.6961	60.6519	47.1674	56.895	54.2313	57.9586	1.1401	0.914135	1.34337	1.77602	1.28717	1.489	1.07296	1.06606	0.667351	0.516195	0.172847	0.790789	0.326041	0.0166239
Exosc9	4	27.9016	22.0601	30.2691	17.5027	26.3052	44.0365	25.7097	37.2661	6.9591	13.7216	18.8412	21.6389	18.3629	17.8351	16.4777	18.7216	17.8237	20.0097	14.7683	14.963	1.48089	1.01946	1.64838	0.981362	1.59641	2.35217	1.44245	1.86241	0.471217	0.917033	0.895472	0.217177	0.693113	0.000899528
Fam134b	4	140.6	151.516	109.216	72.6959	77.6362	112.582	41.7964	34.8875	17.0796	6.95496	48.0914	52.9228	54.8326	57.4691	44.0779	51.9415	17.7508	20.2215	8.79715	8.52932	2.9236	2.86297	1.99181	1.26496	1.76134	2.16747	2.35461	1.72527	1.9415	0.815418	0.101725	0.509293	0.698283	0.0358304
Fbxw8	4	36.4142	27.8901	39.918	14.7473	19.9383	27.8022	32.2528	36.7514	18.2943	19.6041	19.2618	15.8565	14.7501	14.6762	16.4906	15.8039	19.7489	21.5522	20.7148	18.7688	1.89049	1.7589	2.70629	1.00484	1.20907	1.7592	1.63314	1.70523	0.883149	1.04451	0.759271	0.834159	0.461673	0.0251521
Gabpa	4	41.1318	36.437	34.3451	41.0277	29.7996	33.5481	32.5645	32.9038	13.3936	9.75973	14.6861	16.8985	17.3173	15.2066	13.9744	16.1729	13.3529	16.7069	9.65209	9.35933	2.80073	2.15623	1.98328	2.69801	2.13245	2.07435	2.43876	1.96947	1.38763	1.04278	0.956145	0.842677	0.656613	0.0122035
Gins2	4	87.1308	83.3996	74.8635	49.9329	37.0477	30.4052	22.8882	30.9222	6.58963	9.88603	44.4536	38.7989	31.0086	28.4194	29.1853	27.8837	14.5062	20.6888	10.561	10.2837	1.96004	2.14954	2.41428	1.757	1.26939	1.09043	1.57783	1.49463	0.623957	0.961334	0.937582	0.150025	0.267554	0.038293
Glod4	4	72.4899	62.9714	58.489	39.615	34.7809	62.0865	50.4317	35.0431	12.2858	27.6474	32.8007	38.3908	29.1765	26.9723	24.9394	25.7819	21.1943	22.8577	18.1963	18.8179	2.21001	1.64027	2.00466	1.46873	1.39462	2.40814	2.3795	1.5331	0.675177	1.46921	0.814088	0.824692	0.63666	0.0149798
Glrx2	4	38.0132	59.7354	49.8214	17.5616	15.3988	45.6909	32.0498	16.4004	9.90245	10.6115	20.1076	13.1655	11.3228	9.82393	12.2296	10.9013	9.43222	8.68838	8.09939	8.67117	1.89049	4.53728	4.40009	1.78763	1.25915	4.19134	3.3979	1.88762	1.22262	1.22376	0.952486	0.652037	0.447839	0.00907267
Gmfg	4	51.652	52.1794	47.7309	71.1226	76.5673	29.9335	22.5332	46.5591	25.9496	7.41536	44.3006	50.9293	39.9426	44.0983	32.6004	38.5357	36.5268	36.5753	59.1804	56.5451	1.16594	1.02455	1.19499	1.61282	2.34866	0.776773	0.616894	1.27297	0.438483	0.131141	0.428348	0.995935	0.0804497	0.000589002
Gng2	4	219.792	280.375	306.652	58.1551	273.272	133.036	120.678	130.387	68.7071	40.4946	144.552	124.67	108.4	97.7465	87.4136	85.3873	57.2639	70.27	45.1852	48.6971	1.5205	2.24893	2.82888	0.594959	3.12619	1.55803	2.10741	1.85551	1.52057	0.831561	0.265734	0.0989517	0.88956	0.0183603
Gps2	4	66.8656	68.8729	41.1931	92.0711	35.7188	48.5915	23.5718	41.2121	18.6627	20.3989	13.7267	16.0015	11.983	13.3203	9.53731	10.5294	5.80698	8.32539	6.55963	8.1549	4.87121	4.30416	3.43763	6.91209	3.74516	4.61485	4.05922	4.95016	2.84509	2.50143	0.778026	0.713167	0.440811	0.0233158
Grpel1	4	95.5716	78.8471	76.3677	74.0561	44.8948	43.3856	54.3905	59.5306	25.2076	48.6225	42.2124	49.701	40.525	35.5048	33.0399	38.3492	26.2042	32.7463	30.1527	30.9852	2.26406	1.58643	1.88446	2.0858	1.3588	1.13133	2.07564	1.81793	0.835999	1.56922	0.824719	0.218141	0.0579693	0.039937
Gtf3c6	4	21.7567	18.4178	18.3	26.8355	16.6992	7.96327	13.9872	14.8211	10.7387	5.1784	11.3873	9.68813	6.84787	7.02835	5.7165	9.05108	6.02358	8.28687	7.18097	9.3103	1.9106	1.90107	2.67236	3.81817	2.92123	0.879814	2.32208	1.7885	1.49543	0.556201	0.157108	0.102546	0.30647	0.00232067
Hcfc1r1	4	69.2827	122.483	57.668	62.1966	42.5036	88.6666	33.6592	36.43	5.07605	39.1643	22.6759	11.7069	20.7609	14.2681	17.5098	13.2716	11.604	14.166	12.6798	10.122	3.05534	10.4624	2.77772	4.35914	2.42742	6.68093	2.90065	2.57165	0.400326	3.86922	0.361271	0.76504	0.473897	0.0312012
Hist1h2ab	4	327.852	406.649	258.572	258.363	497.063	322.42	152.98	135.019	27.9509	11.9809	171.109	85.4455	104.894	70.8636	118.834	92.6309	61.7273	34.9639	19.7721	10.8241	1.91604	4.75916	2.46507	3.64592	4.18283	3.4807	2.47833	3.86165	1.41365	1.10687	0.828992	0.528059	0.773712	0.000320075
Hist1h2bk	4	379.292	297.922	212.194	265.037	271.392	228.125	97.8972	151.258	43.2609	11.332	149.443	149.724	112.038	104.778	124.254	160.732	50.1601	82.4178	18.1701	19.2534	2.53803	1.9898	1.89394	2.52951	2.18416	1.41929	1.9517	1.83525	2.38089	0.588572	0.968639	0.596926	0.630559	0.0345292
Hist1h4b	4	501.906	439.824	334.212	87.2687	385.679	263.719	126.331	147.79	58.836	22.6975	148.143	109.832	84.6113	89.8241	82.685	83.9992	32.5044	40.676	14.1768	13.8748	3.38798	4.00451	3.94997	0.971551	4.66443	3.13954	3.88658	3.63334	4.15017	1.63588	0.0739148	0.053611	0.702508	0.038759
Hist4h4	4	260.991	201.818	189.069	51.2229	114.015	93.0771	57.5921	21.1128	5.8836	5.04389	130.355	87.0037	73.4851	65.5035	64.1436	66.1873	19.677	21.7685	8.97429	7.0394	2.00215	2.31965	2.57289	0.781988	1.77749	1.40627	2.92688	0.969879	0.655607	0.716523	0.217116	0.642163	0.68691	0.0109289
Hmgcl	4	65.6115	44.3778	42.0152	48.3909	31.8645	42.6604	19.8436	17.6058	22.5112	12.0615	27.3416	22.3958	21.615	19.9029	11.9035	13.1653	7.6636	7.65459	12.6066	10.962	2.3997	1.98152	1.9438	2.43135	2.67691	3.24036	2.58933	2.30003	1.78567	1.1003	0.932961	0.43135	0.765663	0.0232168
Hn1l	4	127.226	159.336	112.437	72.3937	112.029	88.7939	56.7142	60.2025	22.4514	15.8101	60.4959	58.0456	52.6128	44.6351	46.5768	43.0322	31.1614	36.6852	22.6175	22.5795	2.10306	2.74501	2.13707	1.6219	2.40525	2.06343	1.82001	1.64106	0.992658	0.700198	0.534068	0.577221	0.48385	0.0040136
Hnmt	4	71.2261	41.9423	69.5952	35.8968	37.4844	27.8578	26.0389	33.5751	10.308	21.2084	22.6986	28.0247	21.7597	20.1117	15.8911	16.9507	11.564	13.5118	13.7176	11.7253	3.13791	1.49662	3.19835	1.78488	2.35883	1.64347	2.25172	2.48486	0.751443	1.80878	0.756588	0.681938	0.359191	0.00910681
Hnrnpdl	4	51.8169	36.9501	42.7194	68.0853	53.6298	37.6555	43.3835	38.3243	13.0162	15.808	21.2748	23.4269	27.9855	24.7898	25.4984	26.1705	18.337	21.0979	14.4827	12.9401	2.4356	1.57725	1.52648	2.7465	2.10326	1.43885	2.3659	1.8165	0.898746	1.22163	0.820751	0.702518	0.370698	0.00662572
Ifitm6	4	94.7469	88.5037	64.5137	84.8207	34.9626	80.9171	40.6081	87.1336	40.9195	38.838	50.1176	46.3141	32.6493	36.8899	30.8691	33.1818	30.9336	33.6162	41.4806	43.7885	1.89049	1.91094	1.97596	2.29929	1.13261	2.4386	1.31275	2.59201	0.986474	0.886945	0.689634	0.520229	0.541655	0.0112666
Ift52	4	16.4844	20.317	23.6958	18.9235	18.1496	10.8504	11.5255	11.0631	7.15699	6.13554	11.1095	10.564	9.00189	8.75695	7.31495	6.9925	5.09012	5.29598	5.63233	5.53489	1.48382	1.92324	2.63231	2.16097	2.48117	1.55172	2.26428	2.08897	1.2707	1.10852	0.299357	0.672824	0.556085	0.0189067
Ilf3	4	16.6925	24.3528	15.4648	23.0436	17.0972	19.3474	32.5056	30.0597	10.2093	16.2281	8.75293	10.6879	9.91511	9.04985	9.70999	9.36587	11.3632	14.1379	11.0022	11.5215	1.90708	2.27853	1.55972	2.5463	1.76079	2.06573	2.86059	2.12618	0.927936	1.4085	0.995199	0.941453	0.201659	0.00184735
Irf7	4	36.32	14.7933	17.7069	22.3089	19.7351	24.9948	249.552	246.433	138.373	151.987	28.2175	27.0755	23.5223	36.2621	31.1637	37.0296	337.362	378.035	607.946	598.684	1.28714	0.546371	0.752768	0.615212	0.633273	0.674996	0.739717	0.65188	0.227607	0.253868	0.497818	0.92452	0.978984	0.000401187
Isca2	4	25.3145	31.8241	25.6862	79.1002	22.7181	26.0806	21.2391	33.8571	23.7399	5.08794	13.926	12.2386	12.7025	10.6855	13.9854	11.0255	12.3113	14.4718	14.6067	12.0063	1.81778	2.60031	2.02214	7.40258	1.62441	2.36548	1.72517	2.33953	1.62528	0.423772	0.111454	0.103627	0.709322	0.00119085
Larp4b	4	33.2105	40.3473	15.3447	40.0506	31.9331	30.5496	23.4151	28.6566	15.7578	12.1182	26.4343	30.6081	28.7799	27.8939	36.9876	35.6511	23.6817	26.9462	21.1258	23.8198	1.25634	1.31819	0.533174	1.43582	0.863346	0.856905	0.98874	1.06348	0.745904	0.508745	0.248191	0.993396	0.461223	0.044373
Lta4h	4	50.4194	45.8826	44.3302	13.6921	34.5951	27.6117	29.3532	29.4615	16.0672	8.36283	23.5628	25.9702	20.4411	18.0588	15.3466	16.7797	13.6766	14.8495	9.36151	8.69635	2.13979	1.76674	2.16868	0.758199	2.25425	1.64554	2.14623	1.98401	1.7163	0.961649	0.210261	0.196582	0.625185	0.0397257
Mad2l1	4	127.978	98.3878	104.143	57.4742	56.1466	106.721	36.1146	49.2011	47.5318	5.0935	44.3707	39.0128	36.32	34.4656	35.5501	28.5136	16.3492	20.6009	11.361	10.3024	2.88429	2.52193	2.86736	1.66758	1.57937	3.7428	2.20896	2.3883	4.18376	0.494401	0.601129	0.771207	0.829488	0.0309593
Med21	4	97.5198	73.1176	144.305	103.758	109.397	124.193	93.585	112.197	29.638	53.5383	28.658	26.8822	47.8543	47.6047	53.0112	56.5153	44.3623	48.4278	35.4729	31.4957	3.40289	2.71993	3.0155	2.17957	2.06366	2.19752	2.10956	2.31679	0.835509	1.69986	0.733029	0.690599	0.660984	0.0166227
Mpc2	4	67.8374	90.0704	90.7351	152.296	56.4981	68.3019	39.5674	46.5622	14.4586	27.889	54.3689	47.7306	40.9073	39.3131	37.3549	43.9376	27.9522	30.161	27.2743	24.6531	1.24772	1.88706	2.21806	3.87393	1.51247	1.55452	1.41554	1.54379	0.530119	1.13126	0.0547901	0.0997595	0.999848	0.0464345
Mrpl17	4	108.947	98.8028	85.1509	64.5535	66.0627	97.8344	39.7819	57.167	48.324	16.275	34.1101	33.435	32.7888	23.685	22.4903	23.3929	17.6811	20.9442	16.6341	18.5541	3.19398	2.95507	2.59695	2.7255	2.93738	4.18222	2.24997	2.72949	2.90512	0.877162	0.788782	0.485416	0.456485	0.0411862
Mrto4	4	59.1197	47.3623	59.1546	16.553	35.0023	35.5302	33.2301	46.0535	5.13357	28.0558	23.1645	23.2613	23.028	20.1592	25.1413	23.5768	21.6781	22.2495	16.7386	13.3967	2.55216	2.0361	2.56881	0.821112	1.39222	1.507	1.53289	2.06986	0.306691	2.09422	0.198876	0.89691	0.350571	0.0201241
Mta3	4	46.538	34.7889	24.2523	52.0076	25.8193	26.1881	22.4688	13.4219	9.48769	6.86273	17.2853	17.3443	15.9077	14.7396	9.64659	10.8935	6.37621	8.85101	7.02608	7.50597	2.69234	2.00578	1.52456	3.52842	2.67652	2.40402	3.52385	1.51643	1.35035	0.914302	0.934421	0.787789	0.986103	0.00313234
Ndufc1	4	223.292	230.54	284.957	189.58	173.415	193.773	104.269	157.845	80.54	48.3317	80.6805	62.4993	71.5485	68.138	69.6269	61.7874	42.6197	48.6996	45.5784	39.5222	2.76761	3.68867	3.98271	2.78229	2.49063	3.13612	2.44649	3.24119	1.76706	1.2229	0.82901	0.710821	0.680826	0.00744989
Papd4	4	23.6503	10.434	9.81719	30.4757	6.63269	20.3512	21.0896	24.6975	7.56112	10.8033	22.0633	19.1137	23.5538	19.6211	24.7403	19.7256	29.6619	30.8526	28.5261	25.1291	1.07193	0.545893	0.416798	1.55321	0.268092	1.03171	0.711002	0.800501	0.26506	0.429914	0.843124	0.161306	0.227751	0.00651392
Pcid2	4	37.8954	23.5544	22.8722	6.91504	21.9883	18.6797	29.2633	32.5582	12.2546	18.7131	14.3082	12.3442	10.7787	9.24471	11.8727	10.5923	12.0942	11.8857	11.5471	12.4839	2.64852	1.90813	2.12198	0.748	1.852	1.76352	2.41961	2.73928	1.06128	1.49898	0.101674	0.278669	0.11375	0.0047933
Pcp4l1	4	522.981	556.657	313.129	191.866	308.437	276.337	128.106	99.5446	36.0627	17.3901	89.9072	76.0775	86.8319	72.2987	63.7347	69.165	30.5335	48.2243	25.1117	21.4172	5.8169	7.31697	3.60615	2.6538	4.83938	3.99533	4.19558	2.0642	1.43609	0.811972	0.0870982	0.361722	0.382807	0.000105183
Pla2g7	4	75.5811	84.8209	63.8093	52.2273	58.953	41.5197	41.5275	36.6847	30.4563	33.527	12.4312	16.1894	11.6894	14.6114	11.85	11.0491	10.5198	9.57083	13.7101	12.8666	6.07997	5.2393	5.45872	3.57441	4.97492	3.75775	3.94756	3.83297	2.22145	2.60575	0.629681	0.991011	0.853916	0.0393027
Polr3c	4	26.3334	16.228	21.1534	10.691	18.3262	12.0579	25.9929	27.4564	12.5764	16.1723	8.0481	7.69333	7.03931	6.30136	7.3521	7.3158	10.4546	14.4307	10.5392	11.4389	3.27201	2.10936	3.00504	1.69662	2.49264	1.64821	2.48627	1.90264	1.1933	1.4138	0.710273	0.863989	0.566595	0.0329059
Ppp1r7	4	37.4582	41.5505	40.0183	20.149	22.6263	21.1513	23.4642	20.0458	6.75545	19.9076	10.4404	10.402	10.7696	10.6578	8.63069	8.01784	6.79214	7.53398	7.50409	6.70615	3.58779	3.99446	3.71585	1.89053	2.62161	2.63803	3.45461	2.66071	0.900236	2.96856	0.393197	0.961621	0.383001	0.0194708
Ppp4r1	4	17.7341	18.0071	14.7417	22.0693	13.7728	11.8058	17.1682	15.1847	15.9914	19.7411	20.2912	20.0807	17.2162	14.5955	17.5157	16.9882	17.0464	18.1894	34.0496	34.7719	0.873983	0.896736	0.85627	1.51207	0.78631	0.694937	1.00715	0.834811	0.469652	0.567733	0.383229	0.215163	0.404481	0.016821
Ppp6r3	4	35.7071	23.3893	35.3725	27.6918	31.0779	43.7647	33.7262	35.6583	17.3204	19.3339	23.4794	27.7078	25.7716	22.2545	22.3742	21.8481	23.6623	26.564	21.4734	23.1381	1.52078	0.844141	1.37254	1.24433	1.389	2.00313	1.42531	1.34235	0.806601	0.835588	0.613183	0.455811	0.592111	0.0303793
Prkag1	4	49	38.135	40.2968	42.42	47.8752	30.534	20.7702	17.9012	11.1175	12.7077	34.0294	31.4219	28.4392	23.3352	19.8061	20.1431	12.276	13.2801	13.435	14.0083	1.43993	1.21364	1.41694	1.81786	2.4172	1.51585	1.69193	1.34797	0.827503	0.907157	0.516954	0.584648	0.484007	0.0419306
Psenen	4	110.787	88.5959	60.7821	144.132	62.1403	131.394	46.7301	46.6864	24.162	6.47299	58.3298	37.0407	48.3483	35.9556	50.6767	30.5474	36.9512	28.479	39.2579	25.452	1.89933	2.39185	1.25717	4.00862	1.22621	4.30131	1.26464	1.63933	0.615467	0.254321	0.800672	0.988336	0.188551	1.71961e-05
Psmd9	4	31.6201	40.9204	30.3019	13.28	41.383	38.0065	26.8763	25.7685	13.7284	5.29609	23.2923	19.9656	17.1465	15.4355	17.89	17.8524	13.9483	20.8978	15.8416	14.9018	1.35753	2.04954	1.76723	0.860357	2.31319	2.12893	1.92686	1.23307	0.866606	0.3554	0.423387	0.0971457	0.275224	0.000195008
Psme3	4	107.038	83.9113	92.4224	135.382	75.0463	86.684	61.7159	80.5933	26.5428	43.9578	27.2206	28.0873	27.9092	26.1328	30.7252	33.3706	22.7797	29.589	18.7227	23.8073	3.93222	2.98752	3.31154	5.18053	2.4425	2.59762	2.70925	2.72376	1.41768	1.8464	0.538456	0.237364	0.510221	0.0305086
Ptma	4	615.049	767.198	735.267	737.527	553.817	455.217	345.417	356.858	198.894	133.802	491.622	512.528	448.771	415.95	399.745	388.114	249.559	347.266	221.791	220.243	1.25106	1.49689	1.6384	1.77312	1.38542	1.17289	1.38411	1.02762	0.896766	0.607517	0.442883	0.446508	0.838534	0.0388721
Ptms	4	129.687	234.485	124.354	58.8242	123.66	196.409	121.93	100.714	54.7293	61.2545	37.867	28.8745	22.9992	36.6996	25.12	37.656	24.9711	41.141	31.187	39.0142	3.4248	8.12083	5.40687	1.60286	4.92277	5.21589	4.88283	2.44801	1.75488	1.57006	0.163798	0.138144	0.538692	0.00306703
Pttg1	4	80.054	21.4345	44.116	62.6058	53.4179	68.2566	92.4725	134.878	90.6075	97.0949	22.487	19.5798	16.0813	16.4083	16.3992	22.5988	59.3174	67.1155	83.1227	88.2068	3.56002	1.09472	2.74331	3.81549	3.25735	3.02036	1.55894	2.00965	1.09004	1.10076	0.154263	0.9903	0.100623	0.0482099
Rcl1	4	17.4084	12.3586	16.9575	12.1075	39.0574	41.9686	34.023	30.6436	11.428	7.69762	8.98742	9.08077	8.75928	8.50301	27.0452	29.9914	23.5675	25.2656	17.3229	16.5887	1.93698	1.36097	1.93595	1.42391	1.44415	1.39936	1.44364	1.21286	0.659704	0.464028	0.888078	0.742913	0.870761	0.000645538
Rnaseh2c	4	51.6333	80.7047	53.5822	53.2276	78.1068	51.9869	52.124	32.4024	11.005	11.7929	51.8102	37.6233	32.2652	36.2912	27.9634	28.2683	23.993	26.7568	20.5972	18.001	0.996585	2.14507	1.66068	1.46668	2.79318	1.83906	2.17247	1.211	0.534294	0.655124	0.742875	0.291629	0.331498	0.000543037
Rpl30	4	512.268	419.89	686.537	303.298	432.265	674.309	338.961	413.665	132.855	205.01	495.66	417.288	379.779	341.514	335.848	293.243	228.796	222.91	215.92	178.029	1.03351	1.00623	1.80773	0.888101	1.28708	2.29949	1.48149	1.85575	0.6153	1.15155	0.495355	0.335436	0.907889	0.00502138
Sass6	4	19.4858	13.3805	13.0636	18.9396	10.9295	7.88679	15.1123	16.5136	9.78952	9.32484	9.22743	9.32619	6.41005	6.68442	5.32705	6.02461	7.98927	9.35968	8.15129	8.95893	2.11172	1.43472	2.03798	2.83339	2.0517	1.3091	1.89157	1.76433	1.20098	1.04084	0.329902	0.347325	0.538376	0.0491826
Sdhaf2	4	74.4425	82.5755	38.5714	31.1318	64.8528	50.1784	52.7649	39.9759	22.2805	28.651	21.9508	28.111	17.4741	18.6245	15.3397	18.3959	12.2619	16.7225	14.4476	16.2906	3.39134	2.93748	2.20734	1.67155	4.22779	2.7277	4.30316	2.39055	1.54217	1.75874	0.205014	0.129709	0.801102	0.00724638
Sf3a3	4	41.0914	52.5044	43.9379	35.7828	33.551	36.1723	46.5928	33.6616	18.2922	14.6361	25.3126	27.0331	21.1305	22.3143	20.5136	22.4447	22.5861	28.077	21.1618	21.209	1.62336	1.94223	2.07936	1.60358	1.63555	1.61162	2.06289	1.1989	0.864399	0.69009	0.861422	0.806822	0.940902	0.00325075
Sirt2	4	68.9856	77.7566	57.0149	76.8253	63.2414	43.561	54.365	56.1658	48.695	31.6816	23.464	20.9511	21.5681	21.3268	20.219	20.5811	17.0806	23.7156	21.4136	24.3055	2.94006	3.71133	2.64348	3.60228	3.12783	2.11656	3.18285	2.36831	2.27403	1.30348	0.97948	0.692421	0.538288	0.0408026
Smim14	4	155.642	158.015	132.499	77.7765	51.7877	108.034	49.7995	63.1667	37.1089	5.30211	79.8172	69.81	69.3592	62.8916	58.9989	48.5115	32.9902	30.9901	23.7894	21.8776	1.94998	2.2635	1.91033	1.23668	0.877773	2.22698	1.50952	2.03829	1.55989	0.242353	0.403312	0.801877	0.272956	0.000236374
Snrnp27	4	15.1556	50.4341	32.0378	49.6482	41.5591	32.5297	39.269	26.1549	27.6363	10.1537	24.2284	29.2443	19.4463	21.3244	17.9902	23.9044	16.3793	27.8789	23.6515	27.794	0.62553	1.72458	1.6475	2.32823	2.3101	1.36082	2.39747	0.93816	1.16848	0.365321	0.0589963	0.842943	0.669009	0.00095344
Snrnp40	4	55.2096	33.441	21.5605	46.1306	40.3385	39.8537	21.5115	17.8647	5.10944	7.30037	23.3631	22.1815	18.6504	17.7412	15.1589	17.9291	12.2211	13.287	11.6714	10.0114	2.36311	1.50761	1.15603	2.60019	2.66104	2.22286	1.76019	1.34453	0.437776	0.729204	0.870856	0.342194	0.146253	0.000670025
Snrpd2	4	251.039	214.955	180.989	121.525	265.557	163.349	120.636	126.834	20.6513	88.5196	129.063	115.148	105.125	90.7711	85.5276	111.007	82.398	97.1459	77.7216	68.932	1.94509	1.86677	1.72166	1.33881	3.10492	1.47152	1.46406	1.30561	0.265708	1.28416	0.546866	0.313735	0.146763	0.00419477
Snrpf	4	130.851	141.771	145.895	75.9157	88.7555	143.433	56.3195	78.7735	14.2689	29.052	59.2355	43.5553	54.5943	38.3385	47.3974	38.7794	30.656	36.3517	34.8546	23.9997	2.209	3.25498	2.67236	1.98014	1.87258	3.69868	1.83715	2.16698	0.409383	1.21052	0.759559	0.713334	0.548106	0.000878137
Srsf2	4	353.141	223.1	266.075	240.447	290.555	281.003	209.924	233.836	101.436	93.4226	106.76	90.8252	85.3617	94.7392	83.0103	103.463	62.2079	83.3487	58.4221	61.3233	3.30781	2.45637	3.11703	2.53798	3.50023	2.71599	3.37456	2.80551	1.73627	1.52344	0.948505	0.760424	0.66606	0.00818732
Stk38	4	36.913	29.4685	25.1119	18.1807	22.9003	32.412	21.7372	25.6983	6.55626	19.3909	17.8689	19.6392	15.2239	13.7674	9.60471	8.79639	8.32656	10.4237	9.62347	10.8	2.06577	1.5005	1.6495	1.32057	2.38428	3.68469	2.61058	2.46537	0.681278	1.79545	0.649569	0.0629648	0.929371	0.00203256
Sub1	4	192.721	161.469	179.429	271.236	141.446	99.8049	147.984	106.146	57.6811	84.4752	76.5652	92.5996	77.3697	91.0016	64.6859	87.1459	57.4857	76.7268	56.8478	67.0953	2.51709	1.74374	2.3191	2.98057	2.18665	1.14526	2.57428	1.38342	1.01466	1.25903	0.460522	0.197249	0.377833	0.0391857
Syf2	4	56.9757	41.7361	49.086	35.7582	33.7664	55.6543	90.7252	93.9201	63.0094	37.2715	32.0714	40.8261	24.8285	30.0047	26.5113	35.983	46.8935	66.9272	44.3492	51.3507	1.77653	1.02229	1.977	1.19175	1.27366	1.54668	1.93471	1.40332	1.42076	0.725822	0.678222	0.866553	0.413365	0.0338925
Taf15	4	47.17	34.4506	33.7645	46.6044	37.7216	48.7179	59.4679	55.9149	36.1335	24.6404	7.95474	8.37805	8.13805	8.02634	8.30015	9.34182	8.13508	10.371	6.65635	8.77165	5.9298	4.112	4.14897	5.80644	4.54469	5.21503	7.31006	5.39145	5.42842	2.80909	0.892068	0.981002	0.152022	0.0360716
Ten1	4	35.4262	100.028	57.5959	26.7814	31.612	51.0147	59.6048	42.7264	18.8766	30.7467	37.3079	27.8625	27.2291	24.553	23.9557	24.1574	20.6173	23.4665	21.8656	19.508	0.949562	3.59005	2.11523	1.09076	1.3196	2.11176	2.89101	1.82074	0.863299	1.57611	0.698663	0.749338	0.14162	0.0112427
Tex261	4	118.198	90.5994	52.5552	114.455	70.7663	67.7288	32.4446	32.6599	18.6819	12.0117	93.9942	74.7674	73.9439	61.2645	60.9956	57.0929	30.1194	33.3754	26.4996	26.5092	1.2575	1.21175	0.710744	1.8682	1.16019	1.18629	1.0772	0.978561	0.70499	0.453117	0.882901	0.905064	0.624582	0.0415804
Timm44	4	21.8701	26.8131	20.1473	32.6315	17.109	9.78361	19.599	22.72	14.8426	6.36214	17.6571	18.7816	15.0133	15.2827	14.1933	16.8039	14.9661	16.8028	14.1683	12.8216	1.2386	1.42762	1.34196	2.13519	1.20543	0.582222	1.30956	1.35216	1.04759	0.496205	0.418424	0.053847	0.065738	0.0136124
Tk1	4	237.912	261.426	206.555	166.346	114.649	120.83	42.9981	67.225	13.0936	5.05118	98.4322	82.8485	73.8216	52.3198	57.0989	52.4318	26.1076	29.3435	10.3621	8.53669	2.41702	3.15548	2.79803	3.1794	2.00791	2.30452	1.64696	2.29097	1.2636	0.591703	0.722673	0.425871	0.883989	0.00216435
Tmem242	4	44.5924	51.5252	48.0751	43.5431	31.2647	68.9129	13.7549	24.0486	13.0684	5.60163	62.704	63.2343	50.5757	47.8976	42.2966	37.1652	22.8671	21.8271	22.6296	22.2071	0.711157	0.81483	0.950558	0.909089	0.739177	1.85423	0.601517	1.10178	0.577492	0.252245	0.48611	0.520387	0.187686	0.0456088
Tmem258	4	396.377	274.801	203.612	536.876	181.567	232.262	149.165	177.425	92.9307	81.3274	200.234	135.11	135.209	129.541	133.898	119.355	99.3366	97.7462	91.2458	83.927	1.97957	2.03391	1.50591	4.14445	1.35601	1.94598	1.50161	1.81516	1.01847	0.969025	0.484114	0.266939	0.786858	0.0445001
Tmsb10	4	695.641	702.391	547.491	382.056	636.965	339.97	382.938	338.605	236.973	173.277	159.768	133.891	131.803	136.37	115.165	149.14	105.041	107.275	94.9093	95.4754	4.35409	5.24599	4.15385	2.80161	5.53087	2.27953	3.6456	3.15641	2.49684	1.81489	0.468759	0.865009	0.737739	0.0377467
Tomm6	4	319.714	543.656	470.571	393.088	435.507	295.908	241.887	297.853	98.8445	120.045	99.9834	66.6017	74.9858	76.4964	78.2251	69.9926	45.1575	53.6376	47.3426	51.2754	3.19767	8.1628	6.27546	5.13865	5.56736	4.2277	5.35652	5.55306	2.08785	2.34117	0.617383	0.772726	0.336726	0.000397705
Trmt112	4	37.5009	75.1073	49.1499	85.0494	53.7539	115.907	42.4142	40.4484	34.1915	9.42161	33.9426	20.9399	25.1329	19.9215	25.5856	19.9964	19.6441	22.6158	19.0038	14.9065	1.10483	3.5868	1.9556	4.26923	2.10095	5.79642	2.15913	1.7885	1.79919	0.632046	0.229913	0.677568	0.142187	0.0150983
Txn2	4	109.304	138.566	85.5583	220.743	88.459	123.069	52.0187	64.6738	62.2354	22.7536	26.2658	17.979	22.218	20.278	20.2676	18.5136	10.9261	15.325	13.353	13.2037	4.16146	7.70713	3.85085	10.8859	4.36456	6.64749	4.76094	4.22014	4.66077	1.72327	0.604342	0.69352	0.977153	0.0313441
Ubr3	4	25.2163	19.7623	22.6316	8.49544	19.2171	13.8722	13.8993	13.6583	6.74736	7.23047	15.2523	17.0261	16.2499	16.3805	13.8063	13.9716	11.0448	11.6296	9.39685	10.7415	1.65328	1.16071	1.39273	0.518632	1.39191	0.992885	1.25844	1.17444	0.718045	0.673134	0.0995634	0.233228	0.858662	0.021188
Ufc1	4	110.865	128.174	86.7466	82.6312	58.6807	51.8819	60.6885	66.6949	25.6263	21.1843	75.4934	77.2799	64.4	63.5578	56.7492	63.2232	49.8263	52.1671	47.3426	44.5625	1.46854	1.65857	1.347	1.30009	1.03404	0.820615	1.218	1.27849	0.541296	0.475385	0.686694	0.32941	0.216456	0.00056489
Vps28	4	115.3	135.002	123.492	90.3922	41.5173	126.488	129.616	106.859	66.7458	62.2266	76.0483	65.7399	57.3863	54.8126	50.5957	51.7791	58.5608	67.8055	57.691	54.5116	1.51614	2.05357	2.15195	1.64911	0.82057	2.44284	2.21335	1.57597	1.15695	1.14153	0.778417	0.419201	0.149215	0.0439629
Wdr82	4	64.8268	48.8614	54.3939	42.0962	58.7372	45.5961	42.454	39.8018	33.1253	14.1988	34.9944	32.1978	29.3072	23.9489	26.1391	23.5289	20.2925	21.0925	20.0296	20.982	1.85249	1.51754	1.85599	1.75775	2.2471	1.93788	2.09211	1.88701	1.65382	0.676716	0.777461	0.647445	0.934355	0.00636089
Wdr83os	4	305.235	162.465	198.569	70.714	99.4097	161.675	123.917	162.489	103.881	69.2652	48.177	39.3039	41.6242	41.1912	38.5864	37.7226	33.2271	32.8219	34.7009	27.4194	6.3357	4.13356	4.77052	1.71673	2.57629	4.28588	3.72941	4.95062	2.99362	2.52613	0.139543	0.626324	0.170752	0.0481423
Kcmf1	4	62.8402	29.6249	46.0289	10.6888	28.6381	33.3826	23.8419	28.4673	20.2578	11.0515	47.4503	44.6219	52.3201	52.2728	60.9382	52.0147	29.2361	36.249	36.9244	33.1467	1.32434	0.663909	0.879755	0.204481	0.469953	0.641792	0.815497	0.785327	0.548628	0.333411	0.0221453	0.570476	0.109908	0.0170867
Lamtor3	4	63.3553	37.4811	104.464	146.878	80.5478	86.4863	35.1766	58.768	29.7074	8.48917	44.9069	36.944	45.0734	35.8846	50.1833	42.5831	32.8032	28.7868	32.0692	27.9023	1.41081	1.01454	2.31764	4.09307	1.60507	2.031	1.07235	2.04149	0.926352	0.304246	0.00598086	0.177624	0.528521	0.000206524
Med17	4	27.9615	10.6342	27.9667	19.0244	19.2683	15.124	19.2214	24.5582	14.0477	6.02139	19.3123	18.2701	13.8385	12.0781	12.2041	11.5984	13.5392	14.3153	9.79223	10.1331	1.44786	0.582054	2.02093	1.57511	1.57884	1.30397	1.41969	1.71553	1.43457	0.594231	0.0387756	0.605061	0.657119	0.0264693
Naa35	4	6.10306	14.9335	16.6656	13.8413	14.4982	10.2638	10.7637	12.7783	5.05011	10.4626	7.25417	8.38135	6.81091	5.21882	5.80677	5.70427	5.84363	5.51644	6.64241	6.94705	0.841318	1.78175	2.4469	2.65219	2.49678	1.79933	1.84196	2.3164	0.760283	1.50605	0.0294129	0.688532	0.872644	0.0154872
Shoc2	4	31.1309	11.8395	15.9068	5.04304	20.4545	20.2747	17.2847	25.0394	18.7679	8.26815	22.4893	26.9044	22.7438	22.1246	26.3755	29.2697	20.6134	26.2104	21.9657	24.317	1.38425	0.44006	0.699391	0.227939	0.775514	0.692686	0.838517	0.955321	0.854421	0.340015	0.0438092	0.0613334	0.457489	0.0340308
Snapc5	4	71.4263	140.067	66.0042	15.4276	42.9244	57.1621	43.4348	33.0173	5.98069	20.5085	38.3216	36.0249	23.6718	26.8645	20.1209	24.2782	11.3934	15.8055	8.59354	9.95557	1.86387	3.88806	2.7883	0.574275	2.13332	2.35446	3.81228	2.08897	0.695952	2.06	0.0426509	0.111999	0.286029	0.00680766
Tm2d3	4	80.1144	69.4665	48.0875	19.6195	78.4796	40.107	38.0078	37.9723	15.8728	17.0093	36.8864	34.3107	28.155	29.5985	27.3766	28.85	24.9745	22.596	20.5851	17.9818	2.17192	2.02463	1.70795	0.662856	2.86667	1.39019	1.52186	1.68048	0.771083	0.945919	0.0467572	0.0616794	0.532442	0.0218878
3110002H16Rik	4	23.7704	20.215	25.0239	33.5438	16.4437	6.73469	11.7315	17.1779	15.7901	7.56455	13.7472	13.8107	12.7447	10.3409	9.84931	10.0015	9.12249	9.81871	12.5454	13.9798	1.72911	1.46372	1.96348	3.2438	1.66953	0.673369	1.286	1.74951	1.25864	0.541107	0.156889	0.0217608	0.170023	0.0116241
Chic2	4	30.0322	21.9166	18.0434	44.2124	18.6181	13.435	15.212	23.5273	7.41165	9.53079	22.742	23.5288	26.728	31.3519	34.4042	36.4615	26.5131	30.5561	32.5224	36.0489	1.32056	0.931483	0.675073	1.4102	0.541159	0.368469	0.573755	0.769973	0.227893	0.264385	0.773285	0.0264703	0.193879	0.0105729
Commd9	4	43.379	26.9754	26.0094	35.7747	16.9581	6.09434	17.5165	21.2675	6.16377	5.94459	19.6083	19.9854	11.6561	12.3996	11.4184	9.86015	12.264	12.0541	11.7861	12.7185	2.21228	1.34975	2.23141	2.88514	1.48515	0.618077	1.42828	1.76433	0.522969	0.467395	0.267261	0.0186869	0.088126	0.000170545
Gabarapl1	4	147.014	113.658	79.6716	43.782	113.694	98.1065	37.1027	59.1028	36.5563	12.3117	46.4232	45.3432	37.8953	39.0008	33.5824	30.7216	19.4552	27.0507	18.4711	18.473	3.16681	2.50662	2.10241	1.12259	3.38553	3.1934	1.90708	2.18489	1.97911	0.666471	0.0988904	0.0396745	0.176313	0.0181432
Mrps30	4	25.745	24.988	26.2715	8.40431	46.9309	26.6748	22.5244	24.2343	8.23081	10.8782	13.1229	12.618	12.3072	13.4202	12.8524	15.0545	9.26276	11.079	8.15738	7.77826	1.96183	1.98035	2.13464	0.626243	3.65153	1.77189	2.43171	2.1874	1.009	1.39853	0.114786	0.0215627	0.999137	0.0100295
Vrk2	4	28.0339	18.4041	24.3819	6.92016	19.8958	13.7044	57.39	55.5379	26.8268	19.5483	18.4605	23.5109	18.9357	17.8906	12.1671	13.1051	35.263	38.3977	23.9287	25.7007	1.51859	0.782792	1.28762	0.386805	1.63521	1.04573	1.62749	1.44639	1.12111	0.760616	0.158341	0.0484046	0.461805	0.0318717
Mob3a	4	57.2544	48.2937	46.2946	45.0865	26.7615	15.6685	22.9589	22.386	33.5583	14.9838	22.7141	22.6876	19.4318	18.881	17.3877	15.4892	10.0038	10.3468	19.9059	19.154	2.52066	2.12864	2.38241	2.38793	1.53911	1.01157	2.29502	2.16358	1.68585	0.782279	0.875698	0.101988	0.0253292	0.00695431
Mrpl34	4	81.807	137.681	75.1368	53.3139	14.2403	65.3918	56.3852	45.6397	26.4547	7.08722	37.0058	33.557	29.3766	32.6239	25.3487	25.9377	13.0192	15.1013	13.0119	12.2707	2.21066	4.10291	2.5577	1.6342	0.561775	2.52111	4.33092	3.02224	2.03312	0.577571	0.354112	0.161675	4.052e-05	5.97244e-06
Pex19	4	38.2555	58.8303	25.143	30.8921	31.2107	7.38998	26.0679	27.008	24.461	6.11622	26.3984	27.5988	21.6943	20.3348	17.2749	18.2326	18.0355	18.5314	15.3658	13.1486	1.44916	2.13162	1.15897	1.51917	1.80671	0.405316	1.44537	1.45742	1.59191	0.465162	0.476706	0.258229	0.0477046	0.0318367
Rgs2	4	222.773	217.758	92.7279	58.6182	9.66483	37.0901	120.728	164.082	11.5424	22.8822	86.1979	107.185	49.746	58.1288	15.4837	16.7766	55.8263	76.0761	17.6694	16.3116	2.58443	2.0316	1.86403	1.00842	0.624194	2.21082	2.16257	2.15681	0.65324	1.40282	0.138501	0.703698	0.00928034	0.00252333
Smap2	4	30.335	33.9856	32.3194	24.7671	31.6475	14.0639	34.8084	41.6189	8.53445	21.6444	15.9177	18.0621	15.5762	13.6801	18.4148	18.1544	18.5165	22.4944	14.7156	16.1551	1.90574	1.8816	2.07492	1.81045	1.71859	0.774679	1.87986	1.85019	0.57996	1.33979	0.881797	0.178426	0.0468819	0.00541747
Thumpd1	4	29.5577	29.9181	19.6821	13.407	8.28942	25.6941	21.3346	25.8235	8.66228	5.1982	11.7262	16.5464	12.1143	11.6968	11.2144	14.602	8.69099	11.2813	7.5446	7.72039	2.52066	1.80814	1.6247	1.14621	0.739177	1.75963	2.4548	2.28905	1.14814	0.673308	0.22385	0.654287	0.0030635	0.000120736
Dr1	4	72.1406	42.4607	61.6224	7.79094	55.3275	123.999	168.392	168.643	27.6137	65.8396	27.7242	31.6555	24.8952	27.2996	44.9807	51.0607	92.643	120.776	56.4643	62.665	2.60208	1.34134	2.47527	0.285387	1.23003	2.42847	1.81764	1.39633	0.489047	1.05066	0.0157137	0.0317649	0.992321	0.00195523
Gtf2f2	4	29.2858	60.3298	38.206	10.279	58.6653	42.8335	37.9406	51.4426	24.5216	12.0876	15.1591	19.9604	18.2253	18.3805	17.4396	22.3552	15.831	19.4414	10.6788	15.3072	1.93189	3.02248	2.09632	0.559232	3.36392	1.91604	2.3966	2.64603	2.29629	0.789668	0.0234416	0.0151016	0.771683	0.00557366
Abhd17c	5	20.1916	6.27132	52.2447	33.5816	54.362	68.0248	12.2573	18.294	5.68072	25.5673	21.0194	15.8759	31.1452	30.5266	40.4008	39.6068	12.5053	17.5349	12.3484	10.8024	0.960616	0.395021	1.67746	1.10008	1.34557	1.7175	0.980164	1.04329	0.460036	2.36681	0.0166184	0.696359	0.128881	0.396688
Alg14	5	11.9464	14.5768	23.6376	23.4812	18.0919	6.46169	12.3816	13.9162	11.2034	6.00278	15.7981	13.6032	12.564	10.9602	12.1663	10.6954	8.12211	8.88236	7.86323	7.18778	0.756197	1.07157	1.88138	2.14241	1.48705	0.604157	1.52443	1.56673	1.42478	0.835136	0.0218301	0.0700566	0.0963612	0.207882
BC005624	5	14.4137	6.99494	27.4225	21.7928	6.56874	22.971	15.6723	12.8259	19.0086	23.9908	23.826	22.2923	21.1777	19.1488	15.6504	16.421	15.6918	18.7098	17.415	17.8719	0.604957	0.313783	1.29488	1.13808	0.419717	1.39888	0.998758	0.685521	1.09151	1.34238	0.00118571	0.201798	0.789622	0.0653638
Bax	5	143.739	118.83	163.049	334.19	118.652	106.875	99.885	88.634	130.348	113.107	145.896	119.472	126.953	127.124	115.488	116.918	94.4811	101.293	93.1902	80.5954	0.985212	0.994623	1.28432	2.62886	1.0274	0.914107	1.0572	0.875025	1.39873	1.40339	0.0469467	0.0739813	0.941688	0.0648428
Car13	5	16.8676	33.0185	65.6926	87.0105	89.0448	118.069	312.179	305.649	323.349	397.852	18.3696	16.7263	31.5097	26.9244	63.9969	71.2247	163.87	184.382	201.067	195.108	0.918239	1.97404	2.08484	3.23166	1.39139	1.6577	1.90504	1.65769	1.60816	2.03913	0.04409	0.168967	0.399423	0.980521
Carhsp1	5	17.5269	6.8046	16.0058	34.4497	10.8138	20.3145	16.8677	31.7595	49.3102	41.3919	15.0191	11.3724	12.1079	8.71939	10.4997	13.4296	21.1359	22.6748	43.3293	36.8374	1.16697	0.598341	1.32193	3.95094	1.02992	1.51266	0.798062	1.40065	1.13803	1.12364	0.0067093	0.145614	0.513712	0.635828
Cdc16	5	14.6866	24.4367	18.8407	46.9487	11.2974	29.5056	12.2704	14.6642	9.83794	12.6508	18.4672	19.9399	15.6621	15.887	13.1973	16.1438	11.9113	13.4156	9.67769	10.747	0.795279	1.22552	1.20295	2.95516	0.856037	1.82767	1.03015	1.09307	1.01656	1.17714	0.0409275	0.257992	0.597472	0.684257
Cdc34	5	8.83354	28.7834	25.2091	37.5635	24.7735	32.4219	13.079	12.148	20.7103	5.54828	52.3333	32.0301	34.2689	35.0282	36.0507	37.9393	23.7818	25.7789	25.1228	23.1178	0.168794	0.898636	0.735628	1.07238	0.687186	0.854572	0.549958	0.471238	0.824362	0.24	0.0235002	0.686371	0.0672913	0.745321
Chmp1b	5	35.0155	61.8579	63.1639	100.982	74.1959	73.1525	58.5647	74.696	48.6483	75.5907	29.9094	35.4743	26.7433	31.0858	28.6161	28.6604	26.1939	37.9269	29.0361	34.5856	1.17072	1.74374	2.36186	3.24848	2.59281	2.55239	2.23581	1.96947	1.67544	2.18561	0.0467908	0.888281	0.702369	0.600421
Clk1	5	22.0531	21.4792	38.8868	84.1715	33.1865	25.7684	14.9323	32.3728	17.6549	19.1893	24.5824	37.6381	32.6101	39.3738	23.7372	22.2556	21.7547	22.609	17.1164	19.6362	0.897108	0.570678	1.19248	2.13775	1.39808	1.15784	0.686394	1.43186	1.03146	0.977239	0.00849654	0.559972	0.275795	0.647938
Clpx	5	14.2284	10.2124	13.3757	26.8908	11.0321	10.9942	6.35096	9.47883	5.88679	9.04187	10.4482	14.5883	9.92413	10.7339	8.52368	9.3833	8.3901	8.77435	7.85133	7.94488	1.36179	0.70004	1.3478	2.50522	1.29428	1.17168	0.756959	1.08029	0.749782	1.13807	0.0477519	0.297076	0.202164	0.537946
Cox14	5	104.574	171.476	183.384	247.477	122.41	175.66	90.8797	111.812	95.9373	47.9763	52.4295	47.7229	37.0348	37.8944	35.8626	32.2709	30.0093	36.2843	32.0473	26.6165	1.99456	3.59316	4.95168	6.53071	3.41331	5.4433	3.02839	3.08155	2.99362	1.8025	0.0406183	0.525013	0.555409	0.149113
Dapk3	5	25.4559	14.7603	18.4917	52.0465	19.4702	16.5405	17.3461	19.4693	20.346	13.3724	10.6498	9.05359	6.68102	8.74668	6.4118	8.5393	7.78064	10.6105	8.87538	10.0429	2.39028	1.63032	2.7678	5.95043	3.03662	1.93698	2.22939	1.83491	2.29241	1.33152	0.0442873	0.227999	0.745535	0.425567
Eif2ak3	5	49.4815	45.4241	66.2227	98.0317	18.1837	47.4632	13.8946	9.93798	16.0013	10.2882	81.5903	79.3435	71.7783	57.1038	31.1757	32.2029	10.3303	11.3331	9.90424	10.1273	0.606463	0.572499	0.9226	1.71673	0.583263	1.47388	1.34503	0.8769	1.6156	1.01589	0.0131264	0.391661	0.399673	0.571842
Eif2s2	5	22.7796	34.8528	54.3978	78.9783	66.9691	30.3478	48.5561	68.6266	27.6242	37.1013	26.5921	19.7876	26.565	21.1629	29.4103	30.4105	32.1207	29.5521	27.3575	23.407	0.856629	1.76135	2.04772	3.73193	2.27706	0.997938	1.51168	2.32222	1.00975	1.58505	0.0129873	0.122853	0.329502	0.123358
Fbxo28	5	6.32977	17.1632	19.8034	47.3199	24.0635	20.1074	10.9339	17.7509	11.5424	16.6095	13.7649	14.4062	12.7628	12.9049	11.5864	12.3662	9.77266	11.0162	12.1016	11.4367	0.459849	1.19137	1.55165	3.66682	2.07686	1.626	1.11882	1.61135	0.953789	1.4523	0.000521907	0.530512	0.288491	0.760593
Icmt	5	13.6883	12.147	19.4451	60.0188	13.8199	20.4488	11.8224	8.26796	10.6975	15.1317	14.2882	15.7318	11.9496	12.6172	12.3003	12.5125	8.4233	8.36816	8.65504	6.6777	0.95802	0.772134	1.62726	4.75689	1.12355	1.63427	1.40354	0.988026	1.23598	2.266	0.000694516	0.0654396	0.711634	0.16123
Impa1	5	42.5928	45.8566	78.1742	61.5573	45.6724	62.9188	32.459	64.0465	26.4333	47.2098	39.6264	35.7811	28.6747	28.6518	25.1405	25.0579	23.686	24.7759	25.5807	20.9821	1.07486	1.28159	2.72624	2.14846	1.81668	2.51094	1.37039	2.58503	1.03333	2.25	0.0313368	0.778533	0.816761	0.458309
Josd2	5	9.66169	19.9034	14.7053	43.8241	29.4186	6.39905	17.8814	5.35941	6.47196	13.1772	20.2967	18.4384	15.2274	16.3191	12.6784	18.3685	12.1238	14.0251	12.3754	12.0078	0.476023	1.07946	0.965712	2.68544	2.32037	0.348371	1.47491	0.382129	0.522969	1.09738	0.0185155	0.147554	0.51704	0.599489
Lancl1	5	15.6148	16.9599	26.737	42.7912	25.5451	14.5792	10.8372	13.4737	6.10151	8.17297	16.657	16.638	15.4963	12.2744	11.5629	11.2824	9.78315	11.5131	7.58696	6.85048	0.937434	1.01935	1.72538	3.48621	2.20923	1.29221	1.10774	1.17029	0.804211	1.19305	0.00579805	0.353906	0.160398	0.854552
Mrpl1	5	6.59019	9.3988	17.9115	8.54062	13.7295	17.459	18.818	22.543	19.8652	7.09585	14.7407	19.1047	13.3958	12.1652	9.30584	9.87138	10.9326	12.3664	10.5881	10.4103	0.447076	0.491963	1.3371	0.702051	1.47537	1.76865	1.72126	1.82292	1.87618	0.681618	0.031075	0.156	0.57353	0.0614372
Mrpl40	5	47.8364	42.5897	68.9762	63.7614	38.1286	47.6629	25.1621	27.699	11.8055	15.181	31.1635	32.3523	23.2336	21.8785	18.4762	21.6266	12.2445	13.2285	9.5907	9.36527	1.53501	1.31644	2.96881	2.91434	2.06366	2.2039	2.05498	2.0939	1.23093	1.62099	0.0346042	0.438287	0.878865	0.135429
Mtmr14	5	5.21982	7.57166	20.1673	22.4622	20.7197	38.1616	63.4628	70.4194	47.0688	39.5441	20.0498	18.4161	34.4862	33.7505	57.7693	60.4956	103.536	112.251	83.9681	85.6155	0.260343	0.411145	0.584793	0.665536	0.358662	0.630816	0.612955	0.627339	0.560556	0.46188	0.0231409	0.372723	0.245047	0.682381
N4bp2l2	5	22.0197	11.7142	20.5191	33.6324	11.3425	17.709	14.3051	17.7401	13.6965	10.1611	21.0132	25.1563	20.3871	21.3109	19.4278	20.9134	13.9381	15.0355	12.041	12.8795	1.0479	0.465657	1.00647	1.57818	0.58383	0.846777	1.02633	1.17988	1.13748	0.788937	0.0489005	0.0898647	0.0633217	0.662054
Nudt9	5	11.8685	19.3363	41.2088	28.0384	44.5186	45.8537	54.6396	76.8079	38.2603	54.4179	32.4101	31.9929	38.8533	38.9634	49.4735	56.0596	64.089	80.1182	42.2505	42.7005	0.366197	0.604393	1.06063	0.71961	0.899848	0.817947	0.852558	0.958683	0.90556	1.27441	0.0421625	0.973765	0.920433	0.26201
Pmm2	5	25.8363	55.5267	43.4197	111.493	42.2668	26.6182	58.1769	57.8239	45.4299	34.6188	21.2968	22.941	16.9824	16.5534	15.9075	17.6258	19.6597	23.5318	20.6991	21.7067	1.21315	2.42041	2.55675	6.73536	2.65704	1.51018	2.9592	2.45726	2.19478	1.59484	0.01195	0.0829934	0.160009	0.101391
Ptpn2	5	9.52561	18.1136	27.4431	39.6062	41.5981	33.1219	47.5999	65.1684	28.7136	18.1198	13.7484	16.3176	17.3982	20.0896	20.8557	23.7074	32.8201	41.2805	16.0095	19.141	0.69285	1.11007	1.57735	1.97148	1.99457	1.39711	1.45032	1.57867	1.79353	0.946648	0.0330043	0.936994	0.825289	0.487651
Pycr2	5	24.3316	13.9448	25.3061	42.9197	24.1106	19.4277	13.8098	23.6196	13.3106	26.8972	23.7676	19.9153	14.8017	14.6723	12.3897	14.8495	9.25737	10.4123	9.03747	8.30893	1.02373	0.700205	1.70968	2.92521	1.94602	1.30831	1.49176	2.26843	1.47283	3.23715	0.00339	0.40661	0.506247	0.599763
Rab4b	5	42.8049	48.1598	80.9724	73.0401	79.5732	17.9551	33.9521	33.2419	22.9386	19.0503	38.4271	24.1955	25.8505	25.9964	22.8343	22.7862	19.0575	21.8843	22.3748	18.6445	1.11393	1.99044	3.13234	2.80963	3.4848	0.787982	1.78156	1.51899	1.0252	1.02176	0.0394697	0.14333	0.846797	0.0698731
Rabggtb	5	29.8756	16.1449	31.4802	53.278	17.6165	26.0444	15.3117	21.813	14.3679	10.3927	30.0664	32.552	25.117	26.0827	22.6394	23.6021	17.6772	19.1373	14.5309	12.4257	0.993655	0.495973	1.25334	2.04265	0.778134	1.10348	0.866184	1.13981	0.988784	0.836392	0.00846142	0.128056	0.796039	0.995433
Rbm3	5	153.225	145.415	228.03	454.329	136.554	193.381	167.629	197.22	167.644	154.839	193.62	170.684	202.222	132.656	176.783	153.52	167.456	183.377	158.648	138.632	0.791369	0.851953	1.12762	3.42488	0.77244	1.25965	1.00103	1.07549	1.0567	1.11691	0.00549659	0.0535577	0.816681	0.659299
Rpl13a	5	297.085	223.974	301.447	401.538	328.94	461.101	239.45	231.379	165.837	206.145	983.97	834.565	753.324	667.229	656.032	658.891	452.506	466.317	378.062	338.43	0.301925	0.268372	0.400156	0.6018	0.501408	0.699813	0.529165	0.496184	0.438651	0.609122	0.0267321	0.505247	0.341273	0.506072
Rpl17	5	169.876	160.17	224.081	219.388	185.801	214.396	198.071	164.905	119.482	117.367	398.82	351.298	326.662	257.832	318.302	240.46	221.365	225.736	213.649	170.233	0.425946	0.455937	0.685973	0.850895	0.583727	0.891605	0.894773	0.730522	0.559247	0.689453	0.0438	0.884393	0.659902	0.370556
Rpl3	5	125.062	117.273	142.761	162.284	109.559	144.953	132.91	143.931	110.331	72.8819	263.658	242.237	204.123	160.186	174.234	158.636	163.476	155.807	137.985	115.442	0.474334	0.484125	0.699386	1.0131	0.628806	0.913746	0.813025	0.923778	0.799586	0.631329	0.0389128	0.780694	0.596789	0.529075
Rpl36a	5	204.964	257.488	293.167	399.504	285.331	305.301	180.985	206.157	162.109	130.287	448.825	366.49	374.032	265.168	303.76	263.309	203.308	225.836	191.209	165.645	0.456667	0.702577	0.783802	1.50661	0.939331	1.15948	0.890202	0.912863	0.847813	0.786546	0.0180997	0.924893	0.519233	0.902959
Rps18	5	150.817	207.216	269.978	370.545	300.88	241.017	241.062	269.515	196.885	162.758	660.149	495.724	531.536	387.88	469.881	378.749	345.049	320.688	293.826	213.894	0.228458	0.418006	0.507921	0.955308	0.640333	0.636349	0.698632	0.84043	0.670074	0.760926	0.0067344	0.819287	0.503118	0.910077
Sec16a	5	10.098	11.0795	15.7035	25.0589	8.86528	9.41411	8.57252	9.8025	10.036	10.4789	12.715	11.3322	11.7245	10.4032	9.87399	10.2604	9.48321	11.0444	12.1622	12.4716	0.794179	0.977696	1.33937	2.40876	0.897842	0.917517	0.903968	0.887555	0.825181	0.840216	0.0208107	0.0537125	0.889492	0.974501
Sec22b	5	28.9851	53.5862	45.9542	92.2131	60.2887	52.2589	32.6336	39.8606	39.6408	31.5558	33.7304	32.5745	31.7535	24.501	24.4782	27.177	24.8726	27.5372	26.9773	25.9725	0.859314	1.64503	1.44722	3.76365	2.46295	1.92291	1.31203	1.44752	1.46941	1.21497	0.0374189	0.895183	0.129664	0.92841
Sike1	5	30.1143	26.4451	39.1506	51.2229	34.4859	21.3302	14.398	19.4888	8.8254	22.6975	25.0888	24.9038	19.5356	18.2405	13.0292	15.0794	12.0179	12.5014	12.7461	12.5485	1.20031	1.06189	2.00406	2.8082	2.64682	1.41453	1.19805	1.55893	0.692401	1.80878	0.0279397	0.626185	0.254462	0.752585
Slc7a5	5	14.6888	10.3942	18.1167	38.6739	26.7054	38.7466	27.1854	26.5512	11.8752	16.034	8.41285	6.73416	8.35597	6.74134	13.8567	15.1973	14.7046	14.2103	10.1592	9.06016	1.746	1.5435	2.16811	5.73682	1.92726	2.54957	1.84877	1.86845	1.16891	1.76973	0.0287752	0.274722	0.738648	0.292943
Taf11	5	7.38473	18.4309	17.7963	44.6615	10.3552	37.0901	21.4122	22.3024	25.9703	9.89502	10.026	10.3349	6.97966	7.07724	8.47917	8.83503	7.45165	10.3712	9.12174	9.90702	0.736555	1.78337	2.54973	6.31057	1.22125	4.19807	2.87348	2.15041	2.84707	0.998789	0.00088261	0.168232	0.420086	0.0688638
Tomm20	5	46.7356	91.7196	95.7557	216.063	104.855	140.283	67.2009	63.9806	33.7144	29.8059	162.21	129.212	150.865	123.684	153.448	134.687	96.5187	82.0602	69.5911	55.7563	0.288117	0.70984	0.634713	1.74689	0.683328	1.04155	0.696248	0.779678	0.484464	0.534575	0.00255693	0.521335	0.525272	0.370516
Vps41	5	20.7745	11.6915	26.272	21.7099	18.164	11.5672	14.814	13.8398	12.1765	12.1273	27.6663	29.8318	24.6015	23.8638	20.6811	20.8709	18.2237	20.7312	17.8445	19.2756	0.750896	0.391915	1.0679	0.909744	0.878291	0.554226	0.812899	0.667585	0.682366	0.62915	0.0390522	0.326158	0.958426	0.955336
Ccdc50	5	36.8492	61.8111	73.8687	128.415	91.7485	58.3355	98.1399	93.6443	96.9289	64.5794	55.0527	60.4322	63.1074	60.3324	92.2483	100.254	99.1056	118.056	82.4007	91.5265	0.669345	1.02282	1.17052	2.12845	0.994581	0.581878	0.990256	0.793217	1.17631	0.705582	0.0324764	0.0333921	0.580919	0.724938
Celf1	5	20.8468	19.8632	32.9497	35.5603	13.4918	25.608	27.7001	33.2091	35.09	52.6434	17.078	18.5999	14.7706	12.7091	16.171	15.262	17.0567	18.3879	20.5005	21.1003	1.22068	1.06792	2.23076	2.79803	0.834319	1.67789	1.624	1.80603	1.71166	2.49492	0.0179008	0.043202	0.0997298	0.510956
Fdft1	5	16.83	15.2116	20.3977	73.5113	12.5865	15.4128	11.7671	12.5053	16.0755	8.14344	17.4093	16.6144	15.7462	13.4914	12.0116	10.6081	10.0534	7.8788	7.75338	6.30979	0.966729	0.915566	1.29541	5.44875	1.04787	1.45292	1.17046	1.58721	2.07336	1.2906	0.00225815	0.0478875	0.650787	0.502243
Mylip	5	5.82029	13.558	16.3885	41.36	12.079	13.0422	6.24773	10.5466	15.0103	12.868	11.0218	10.2189	10.682	13.4247	12.8427	12.6749	5.43016	5.91422	9.50198	10.5766	0.52807	1.32676	1.53421	3.0809	0.940528	1.02898	1.15056	1.78327	1.5797	1.21665	0.00452576	0.0324011	0.138104	0.93237
Pigv	5	8.70913	19.3212	16.5694	144.846	45.1855	60.5657	105.576	73.2704	81.6743	85.3341	18.4272	15.097	12.1226	12.9418	30.6517	31.2586	69.26	63.0269	63.7561	57.7108	0.472623	1.27981	1.36682	11.1921	1.47416	1.93757	1.52434	1.16253	1.28104	1.47865	2.5859e-05	0.0484083	0.482821	0.846009
Rmdn3	5	16.0337	5.82625	16.8301	32.1836	7.7528	20.5063	46.4559	49.3771	44.0723	68.3415	14.6228	17.902	13.2825	12.3596	20.1488	23.9021	68.6762	72.4596	71.7225	69.9247	1.09649	0.325452	1.26709	2.60395	0.384777	0.857928	0.676448	0.681443	0.614484	0.977359	0.000496458	0.000788926	0.650044	0.254276
Zcchc9	5	16.2622	19.1	12.3758	84.6108	17.1698	11.0875	16.9962	13.0005	26.9131	11.536	12.2454	15.2132	11.9345	10.9395	10.8882	11.8819	11.8206	13.1818	10.7089	12.5222	1.32803	1.25549	1.03697	7.73446	1.57691	0.933136	1.43784	0.986249	2.51316	0.921243	0.0291442	0.039495	0.978833	0.421882
Zfp655	5	77.7648	23.5257	100.427	228.028	19.8264	69.193	17.4453	41.176	49.7236	52.0997	58.3365	61.4613	103.02	100.333	49.1741	57.78	29.1191	33.4067	42.3796	46.9418	1.33304	0.382772	0.974823	2.2727	0.403187	1.19753	0.599101	1.23257	1.17329	1.10988	0.0218449	0.0277846	0.431743	0.150072
Chrac1	5	28.1799	49.1207	50.5496	120.212	62.0951	71.545	29.8024	33.8685	18.8766	42.479	42.5889	36.3646	32.9987	34.5927	32.7582	33.9307	27.0701	31.7276	21.803	24.3032	0.661672	1.35078	1.53186	3.47506	1.89556	2.10856	1.10093	1.06748	0.865777	1.74788	0.00784289	0.735717	0.0310451	0.392425
Emg1	5	40.4566	32.4765	52.6637	92.5577	57.9243	49.3591	24.0389	28.2489	19.9686	19.2585	71.7465	71.4509	64.4366	49.6632	62.6098	62.5992	44.4336	48.6559	35.1483	33.846	0.563883	0.454529	0.817295	1.86371	0.925164	0.788494	0.541008	0.580584	0.568124	0.569003	0.0027545	0.30139	0.0436795	0.369068
Dnajc24	5	26.3501	26.306	26.737	98.2721	36.4565	31.2196	24.7089	19.3264	12.3556	8.82681	19.8852	20.5616	13.5844	13.0521	11.7513	11.9016	7.41001	10.2747	8.10287	8.56971	1.32511	1.27937	1.96821	7.52924	3.10234	2.62315	3.33453	1.88096	1.52484	1.03	0.00316942	0.499331	0.904583	0.00807127
Frg1	5	29.3008	19.0529	44.5966	64.1607	35.703	44.5006	33.6592	39.2323	82.9088	54.8301	19.7746	24.6809	15.939	17.3642	14.4257	17.9283	14.2901	17.9293	13.9814	15.8138	1.48174	0.771967	2.79795	3.69501	2.47495	2.48214	2.35541	2.18817	5.92993	3.46722	0.00141272	0.546476	0.979223	0.0362909
Gpn2	5	8.35605	7.41517	13.354	16.4241	9.84245	13.5591	10.5162	6.48923	25.468	10.4967	10.6081	7.12287	7.49564	6.37051	7.25841	7.54839	6.3031	7.20691	8.01183	6.65812	0.787705	1.04104	1.78157	2.57815	1.35601	1.79629	1.66842	0.900418	3.17881	1.57653	0.0149714	0.443955	0.514849	0.0404833
Il10	5	5.8445	13.7764	627.131	761.053	291.756	453.861	563.011	555.055	226.09	275.316	7.88338	11.7113	205.339	236.664	134.797	168.051	202.447	199.023	147.439	149.33	0.741369	1.17633	3.05413	3.21575	2.16441	2.70073	2.78103	2.7889	1.53345	1.84368	0.000766848	0.538425	0.370736	0.0352519
Polr2d	5	5.00281	41.6204	55.2045	71.8582	58.9273	30.9253	53.7021	38.8514	29.3228	15.0827	22.7582	25.9371	14.4431	15.3532	15.7342	16.5437	13.2824	16.8625	13.0938	11.1859	0.219825	1.60467	3.8222	4.68034	3.74516	1.86931	4.04309	2.30401	2.23945	1.34837	8.75445e-07	0.301861	0.393469	0.0150137
Tnf	5	66.184	22.9421	7516.36	7488.95	1683.1	1718.68	1955.47	2246.36	556.945	579.6	58.1398	56.9128	3548.99	3402.07	1488.23	1355.5	1091.43	1293.78	675.737	638.583	1.13836	0.40311	2.11789	2.2013	1.13094	1.26793	1.79165	1.73628	0.824203	0.907635	0.000211876	0.107684	0.0859344	0.00167287
Yipf1	5	41.6196	33.4472	40.7225	78.9796	29.5377	38.7225	31.1255	40.1269	53.7671	58.8971	31.3604	31.1224	26.1855	23.5972	24.6783	24.7311	25.2065	23.156	23.7714	22.3754	1.32714	1.0747	1.55515	3.34699	1.19691	1.56574	1.23482	1.7329	2.26184	2.63223	0.0473734	0.17913	0.710252	0.0496789
Smim12	5	50.5921	40.5307	87.6973	74.3681	20.4945	60.8104	6.24224	16.3706	6.58963	15.5352	43.1155	35.5805	30.429	23.7888	27.5015	25.8434	17.0169	15.8823	17.7717	11.9976	1.17341	1.13912	2.88203	3.12618	0.745211	2.35303	0.366827	1.03074	0.370794	1.29486	0.00700514	0.0367118	0.0111487	0.135297
Alkbh5	5	9.81712	10.5267	18.9264	26.7175	8.44314	8.09138	8.96342	5.92969	9.20651	17.1005	29.3572	24.1474	22.3362	26.7663	21.956	24.4932	16.5318	19.5618	19.3681	19.7686	0.334403	0.435934	0.847343	0.998177	0.384548	0.330352	0.542193	0.303126	0.475344	0.865035	0.00398952	0.00479511	0.738082	0.0073785
Arhgap4	6	23.3465	20.3477	13.1137	11.1359	21.2014	16.5364	15.6374	11.6914	16.2904	7.96032	17.7302	18.476	15.0163	14.9581	11.7105	11.7241	10.6204	11.2417	7.5624	7.61547	1.31676	1.10131	0.873301	0.744472	1.81046	1.41047	1.47239	1.04	2.15414	1.04528	0.219474	0.0358642	0.378016	0.454129
Baz1a	6	9.68255	7.03681	7.62264	11.6107	17.8846	19.3492	6.79726	9.6153	9.78482	7.13008	8.26538	10.0462	16.4726	16.6425	16.5346	17.5714	8.08577	9.04442	7.30235	8.30009	1.17146	0.700444	0.462746	0.697653	1.08164	1.10117	0.840645	1.06312	1.33995	0.859036	0.115381	0.0348528	0.530025	0.418501
Cbfb	6	142.053	127.448	133.54	44.2189	160.135	116.221	64.4376	73.0039	39.1816	45.4859	123.467	119.246	111.429	94.6578	97.6131	100.533	53.6317	61.7143	38.4712	39.5185	1.15054	1.06878	1.19843	0.467144	1.64051	1.15605	1.20148	1.18293	1.01847	1.151	0.192418	0.0443815	0.610569	0.842481
Chm	6	29.4115	11.7449	21.1888	11.2654	25.0752	34.2408	14.3705	14.7196	17.4687	11.8228	10.994	14.0697	12.1301	12.3896	10.7282	11.5764	9.69159	10.3605	8.71911	9.51755	2.67522	0.834768	1.74679	0.909269	2.33731	2.95782	1.48278	1.42073	2.0035	1.24221	0.637851	0.0378488	0.0551824	0.782785
Cryl1	6	67.6013	60.9832	50.2058	13.5459	36.5468	59.1581	26.2286	48.4926	22.9144	26.1921	25.4187	23.1079	21.0785	17.0495	15.4508	15.7661	15.2784	18.6113	12.1148	10.3306	2.65951	2.63906	2.38185	0.794502	2.36537	3.75225	1.71671	2.60555	1.89144	2.53539	0.06393	0.0341274	0.405649	0.951159
Ddrgk1	6	66.0628	107.63	62.2149	32.4623	70.8666	87.4173	52.2688	47.5629	44.5293	50.2072	43.4189	41.8673	40.699	42.2555	32.5675	40.8284	31.0632	34.7515	31.2855	32.5301	1.52152	2.57075	1.52866	0.768238	2.17599	2.14109	1.68266	1.36866	1.42332	1.54341	0.079895	0.0414991	0.278929	0.925559
H2-Ke6	6	21.1349	21.7694	19.9135	6.84751	41.2086	24.1075	16.7638	16.2829	28.3148	14.1597	18.6327	17.4781	15.2541	17.6865	14.6709	12.5008	10.2887	11.6235	7.71973	8.14197	1.1343	1.24553	1.30545	0.38716	2.80887	1.92848	1.62935	1.40086	3.66785	1.7391	0.124709	0.000986021	0.175507	0.110944
Kpna6	6	36.8526	42.2235	23.6171	16.1293	44.0608	48.3341	29.7949	45.1885	15.916	40.2024	20.6222	21.6541	18.3489	15.7271	21.0119	18.2253	20.6708	23.2423	17.8683	18.7863	1.78703	1.94991	1.28712	1.02557	2.09695	2.65203	1.4414	1.94423	0.89074	2.13998	0.168072	0.0404167	0.314425	0.460291
Med8	6	29.0942	47.8712	36.1637	10.2641	53.8521	44.2126	30.1539	20.7114	29.5583	23.3905	38.6795	39.2365	29.1982	27.4441	30.5011	29.0197	20.8874	28.9868	26.5385	25.2324	0.752185	1.22007	1.23856	0.374	1.76558	1.52354	1.44364	0.714511	1.11379	0.927001	0.290808	0.00700407	0.0742818	0.843557
Mkln1	6	25.4464	28.2265	26.358	7.48101	23.1933	25.9434	20.6695	28.3613	34.8012	27.5258	20.7138	23.9887	20.443	19.7972	15.5616	17.9585	16.4515	18.4994	17.5843	17.8016	1.22848	1.17665	1.28934	0.377882	1.49042	1.44463	1.25639	1.5331	1.97911	1.54625	0.067605	0.0154067	0.90328	0.329075
Mrpl54	6	40.3772	52.2532	55.6023	10.1747	65.7854	68.3415	58.3593	47.2837	22.5392	52.1704	55.1241	42.442	49.5616	50.311	50.6806	55.9834	45.9911	54.7051	47.1342	47.7587	0.732478	1.23117	1.12188	0.202237	1.29804	1.22075	1.26893	0.864338	0.478191	1.09237	0.0670753	0.004727	0.48522	0.343253
Myo5a	6	21.2914	29.2112	21.9594	13.5544	21.6061	26.8425	14.777	13.7789	9.5238	12.7395	50.2361	58.8461	55.749	55.9928	43.1177	41.7682	26.4639	32.9663	19.4633	21.3088	0.423827	0.4964	0.393898	0.242074	0.501096	0.642653	0.558382	0.41797	0.489321	0.597852	0.257518	0.0488727	0.251287	0.137656
Nae1	6	33.7121	24.1172	26.399	7.75647	48.5057	19.6313	24.5954	19.9199	17.1822	13.0115	16.8504	18.586	14.2061	14.3944	14.1955	14.4229	12.6323	14.6033	10.4579	9.53394	2.00067	1.2976	1.85829	0.538855	3.41698	1.36112	1.94702	1.36407	1.64299	1.36475	0.130945	0.0229483	0.430764	0.672713
Nbr1	6	32.0863	29.0772	20.4937	5.41439	13.9799	10.4042	5.83234	6.67443	16.1199	6.33384	24.3373	30.307	16.2462	17.806	9.75385	11.2991	5.35984	5.58075	6.31028	6.25417	1.3184	0.959422	1.26145	0.304076	1.43327	0.920796	1.08816	1.19597	2.55455	1.01274	0.0523004	0.0378174	0.999833	0.179548
Ndufb3	6	104.72	114.778	138.515	15.0792	81.1133	148.348	69.2184	77.4521	99.3759	45.1022	70.4284	64.5542	58.3574	44.6223	52.5272	47.6612	37.9865	37.9418	32.5642	34.8686	1.4869	1.77801	2.37356	0.337931	1.54421	3.11255	1.82219	2.04134	3.05169	1.29349	0.0756455	0.0112691	0.908935	0.880176
Ndufb9	6	171.119	152.816	98.2195	54.8143	91.0996	155.754	67.0973	80.7096	84.9976	61.2081	120.432	106.272	97.0396	92.3812	74.7113	89.2432	60.5951	74.7563	63.4332	66.9713	1.42088	1.43798	1.01216	0.593349	1.21936	1.74528	1.10731	1.07964	1.33995	0.913945	0.0554589	0.0499488	0.288883	0.848665
Ndufs7	6	104.765	132.997	85.9288	30.8	89.4496	113.333	41.3643	74.5797	40.9371	42.6984	80.293	56.1297	55.0904	52.721	49.3952	56.3328	40.8995	42.7555	36.741	31.7535	1.30479	2.36946	1.55978	0.584208	1.8109	2.01184	1.01136	1.74433	1.11421	1.34468	0.0693843	0.0353192	0.196867	0.893259
Nsa2	6	29.9587	37.1088	34.9584	8.3043	34.1676	50.9279	56.1856	45.885	32.7779	35.1248	38.4555	38.3061	30.4777	27.679	28.9148	24.1634	30.8745	31.3827	30.6395	28.7429	0.779049	0.968743	1.14702	0.300022	1.18166	2.10764	1.81981	1.46211	1.06979	1.22204	0.209494	0.00417678	0.6878	0.157078
Pabpc1	6	52.2364	64.0545	124.227	58.0002	163.892	177.849	175.227	181.439	98.5488	89.8154	243.499	180.659	216.994	172.385	229.685	180.014	152.054	182.056	124.957	133.968	0.214524	0.354561	0.572488	0.336458	0.713554	0.987975	1.1524	0.996613	0.788659	0.670426	0.267272	0.0219101	0.276188	0.0971396
Parvb	6	71.4358	45.9593	57.0817	13.5009	84.143	82.7974	38.341	50.391	13.3985	35.1767	21.0851	18.3589	17.8982	15.8769	20.0421	17.746	11.6278	12.9243	7.70083	7.34735	3.38798	2.50338	3.18924	0.850353	4.19832	4.66568	3.29734	3.89893	1.73988	4.78767	0.101376	0.00720612	0.858944	0.212347
Pja2	6	32.4897	17.5747	23.1989	5.76134	22.0481	18.2862	25.8339	24.141	29.1524	27.8134	12.6878	13.8806	10.3806	10.1069	8.73049	9.0261	10.6693	12.1479	12.5977	14.9529	2.5607	1.26613	2.23482	0.570041	2.52541	2.02592	2.42133	1.98726	2.3141	1.86007	0.153382	0.0376913	0.825462	0.687691
Pls3	6	29.6814	33.8261	40.5344	7.68439	32.3841	42.4135	26.4882	32.6282	21.925	19.2045	14.5389	13.8118	14.5472	12.7407	12.6253	14.0359	10.9766	13.6442	10.3467	10.7937	2.04151	2.44907	2.78641	0.603137	2.56502	3.02179	2.41314	2.39136	2.11904	1.77924	0.0952904	0.0243698	0.895533	0.30337
Plxnd1	6	22.6264	20.3178	20.2938	7.94163	53.5594	56.0925	34.4978	36.1714	17.0511	15.971	31.2749	27.5703	29.9811	30.8819	57.6207	56.8124	39.0929	43.7868	21.3104	21.5724	0.723468	0.736943	0.676887	0.257162	0.929517	0.987328	0.882458	0.826081	0.800128	0.740346	0.0655306	0.00794932	0.560174	0.880089
Polr2c	6	10.4195	19.9635	14.417	5.72863	17.5327	36.5959	27.6987	23.2942	31.0908	18.0863	16.2339	17.8961	19.8261	12.8518	15.9831	15.5854	19.3199	20.7996	17.7222	15.095	0.641834	1.11552	0.727173	0.445747	1.09696	2.34809	1.43369	1.11993	1.75434	1.19816	0.271105	0.00453518	0.506759	0.586103
Rassf1	6	16.7698	26.6346	17.4028	8.6438	36.3418	40.6409	29.9082	29.5983	28.5941	39.4508	13.4672	12.8984	10.4531	9.75127	12.3294	12.2347	12.4833	15.7936	19.0814	18.0972	1.24523	2.06495	1.66484	0.886428	2.94758	3.32178	2.39586	1.87408	1.49853	2.17993	0.468926	0.0110584	0.34229	0.451774
Rnf139	6	18.1458	13.9185	14.6906	5.5455	27.069	55.19	84.7447	74.9568	49.7843	68.8685	28.5912	28.4404	23.805	21.6266	36.8517	40.3881	77.7117	71.6113	56.1668	53.9609	0.634665	0.489391	0.617124	0.25642	0.734538	1.36649	1.0905	1.04672	0.886365	1.27627	0.362814	0.00534987	0.741208	0.840255
Rnf181	6	82.0257	69.1153	57.6209	25.0423	51.3166	93.8528	37.9524	32.6669	36.9826	23.7783	38.5491	34.4183	29.4384	30.0649	20.9469	24.046	17.0653	19.3127	18.231	15.647	2.12783	2.00809	1.95734	0.832942	2.44984	3.90304	2.22396	1.69147	2.02856	1.51967	0.172071	0.0171471	0.213456	0.55818
Rpl26	6	400.781	337.395	366.272	144.728	316.12	490.792	270.208	292.948	197.155	202.281	565.96	514.909	451.974	361.937	373.001	352.259	275.785	286.99	262.239	226.429	0.708144	0.65525	0.810382	0.399869	0.847505	1.39327	0.979779	1.02076	0.751815	0.893351	0.439954	0.0259901	0.775686	0.51622
Rpsa	6	86.1748	97.5403	109.077	92.4011	168.68	180.057	123.685	124.057	111.327	67.6019	474.996	358.615	430.208	314.003	338.542	268.09	203.222	202.808	170.536	128.799	0.181422	0.271991	0.253545	0.294268	0.498254	0.671628	0.608621	0.611696	0.652803	0.524863	0.804882	0.00737153	0.978898	0.765928
Sfr1	6	71.3728	77.8209	75.9184	44.1459	97.8073	100.272	47.7338	62.9857	45.6365	38.3082	35.2653	47.1569	41.8127	50.4623	36.7643	43.8288	23.9484	34.0914	27.2806	27.6964	2.02388	1.65025	1.81568	0.87483	2.66039	2.28781	1.99319	1.84756	1.67286	1.38314	0.262599	0.0496654	0.53223	0.299915
Skiv2l2	6	27.4888	20.3742	27.7657	6.42318	38.8263	30.8953	32.2825	35.0941	33.3956	12.18	14.4348	16.5487	16.1812	14.8378	16.9915	15.9028	17.2008	19.2492	10.8145	11.8049	1.90434	1.23117	1.71592	0.432893	2.28504	1.94275	1.8768	1.82314	3.08802	1.03177	0.0623468	0.00552599	0.818232	0.697424
Spryd7	6	14.5837	22.0595	69.617	38.0861	183.677	119.859	159.491	193.907	102.574	79.9409	30.5764	30.0243	87.3502	73.4941	112.251	111.851	150.404	166.131	104.236	91.0869	0.476959	0.734721	0.796988	0.518219	1.6363	1.07159	1.06042	1.1672	0.984058	0.877634	0.941868	0.0241204	0.490727	0.549141
Srsf5	6	26.0866	42.3331	80.1441	18.9904	81.2881	89.5867	46.1341	65.6528	33.9778	49.0329	52.5377	55.3767	99.4196	95.3822	93.1861	92.4993	53.2213	52.2488	48.6718	44.816	0.49653	0.764457	0.80612	0.199098	0.872321	0.968512	0.866835	1.25654	0.6981	1.09409	0.296956	0.0184872	0.626684	0.70118
Stam2	6	20.3796	40.25	35.5576	9.39422	41.8203	46.8578	21.3427	25.091	41.9533	33.7179	16.6697	19.2249	19.5266	21.9664	21.4396	24.0546	17.3658	17.1976	20.0424	24.5518	1.22256	2.09363	1.82099	0.427663	1.95061	1.94797	1.22901	1.45899	2.09322	1.37333	0.0573499	0.0136558	0.199834	0.322039
Tank	6	22.5632	21.4987	54.5947	19.6815	81.1259	102.372	76.6653	94.7257	71.8891	84.0133	25.5228	28.228	56.8483	60.3297	83.6423	88.8928	65.3459	78.948	64.1066	72.323	0.884043	0.761606	0.960356	0.326232	0.969915	1.15164	1.17322	1.19985	1.1214	1.16164	0.141828	0.0159054	0.599319	0.963487
Tifa	6	51.9031	61.4637	69.39	25.4514	98.3522	85.6304	167.196	192.459	101.954	138.858	32.2037	32.2142	36.7378	34.5308	31.6534	37.5634	97.9479	116.05	97.4215	103.619	1.61171	1.90797	1.88879	0.737061	3.10716	2.27963	1.70699	1.65841	1.04652	1.34008	0.244763	0.0200096	0.173805	0.147167
Timm22	6	48.7848	13.5287	20.8833	10.3726	25.6531	35.3399	17.4935	17.759	10.7228	19.9169	24.6764	28.3183	20.2774	18.5176	15.3737	20.0428	13.2398	15.9447	18.0148	14.6885	1.97698	0.477736	1.02988	0.560147	1.66864	1.76323	1.32128	1.11379	0.595222	1.35595	0.547512	0.0257977	0.259839	0.524352
Tmem173	6	59.6147	40.6647	32.8523	23.8287	61.1102	54.5357	47.6838	47.8926	44.9824	60.5982	20.4427	21.9256	16.4618	18.6826	16.0776	16.1933	25.0957	23.0283	22.3379	22.2853	2.91618	1.85467	1.99567	1.27545	3.80094	3.36778	1.90008	2.07973	2.01372	2.7192	0.301999	0.029175	0.0961244	0.648273
Tradd	6	24.2064	20.3697	34.3019	5.04813	36.9864	22.5741	16.9931	13.5046	27.3975	12.5825	14.0406	12.3719	9.20882	8.68258	7.75061	10.6371	6.79337	8.72998	8.43578	7.66893	1.72403	1.64645	3.72489	0.581409	4.77206	2.1222	2.50143	1.54693	3.24777	1.64071	0.68502	0.0344528	0.185074	0.780606
Tspan3	6	94.5612	88.3602	79.0021	33.412	167.765	140.575	150.661	125.053	127.718	162.169	70.0271	71.5959	71.6408	64.88	104.881	117.719	110.023	100.418	120.976	111.9	1.35035	1.23415	1.10275	0.514981	1.59957	1.19415	1.36935	1.24533	1.05573	1.44923	0.0851552	0.0497575	0.891495	0.877476
Ybx1	6	111.225	111.307	82.1904	60.3209	139.238	132.652	133.654	112.143	81.2538	126.76	300.224	236.206	294.597	244.328	231.92	213.353	134.952	166.274	131.038	114.713	0.370474	0.471229	0.278992	0.246885	0.60037	0.62175	0.990382	0.674448	0.620078	1.10502	0.12699	0.00553325	0.219502	0.66465
Alas1	6	38.7274	31.1001	34.3841	7.31926	47.9696	52.9915	57.6387	78.0602	113.496	100.744	20.272	18.6565	17.7609	17.15	27.2682	26.095	39.5989	46.1511	71.6506	76.4073	1.91039	1.66698	1.93595	0.426779	1.75918	2.03072	1.45556	1.6914	1.58402	1.31851	0.0329942	0.0193675	0.621465	0.753604
Cd300lb	6	602.627	535.257	99.6972	64.3743	45.3132	109.664	16.9722	18.3694	66.5478	68.0213	183.176	201.954	58.308	64.0452	19.8382	17.4345	9.96867	7.68417	29.8746	30.2683	3.28988	2.65038	1.70984	1.00514	2.28414	6.29003	1.70255	2.39055	2.22757	2.24728	0.0221744	0.00714058	0.0732487	0.66104
Cnot8	6	75.5166	35.4778	43.947	6.0447	40.8621	34.3244	23.6775	25.2981	39.5757	17.4101	31.2045	31.31	28.3971	21.4103	19.9585	19.2757	19.6638	20.0811	20.1217	18.3838	2.42006	1.13311	1.54759	0.282326	2.04736	1.78071	1.20411	1.2598	1.96682	0.947034	0.00544951	0.0020975	0.127728	0.686992
Csnk2a2	6	58.7698	22.2803	22.6454	9.56059	56.7478	55.7582	47.0872	31.2933	24.4178	32.8945	10.9395	10.1272	9.20443	9.13213	13.1468	12.4203	12.0352	13.0536	10.4871	10.6455	5.37226	2.20004	2.46027	1.04692	4.31646	4.48927	3.91244	2.3973	2.32837	3.09	0.0432489	0.00820561	0.508276	0.387923
Ddx54	6	20.7938	22.736	13.7898	7.63524	24.9925	21.8056	21.7711	25.9526	13.2324	19.2548	17.6929	17.0259	17.2132	18.2327	16.5201	18.3527	20.712	26.4595	20.0758	20.2397	1.17526	1.33538	0.801119	0.418767	1.51286	1.18814	1.05113	0.980839	0.659126	0.951338	0.0123088	0.00797631	0.258487	0.440508
Dhrs7b	6	57.0461	40.9973	23.8465	10.9332	57.6847	17.3834	18.4391	16.6391	7.53492	13.3228	32.3853	31.2801	26.924	21.4911	18.0498	17.3027	10.6859	10.753	11.035	8.78648	1.76148	1.31065	0.885696	0.508733	3.19587	1.00467	1.72555	1.54738	0.68282	1.51628	0.0133938	0.00394429	0.88552	0.12221
Dnajb12	6	26.2246	56.6483	33.6122	14.608	46.4504	57.5915	26.5667	24.564	33.9778	32.9429	17.5953	14.8824	19.9949	20.1091	17.5017	18.5912	13.5622	16.6591	14.3426	13.5228	1.49043	3.80639	1.68104	0.726439	2.65405	3.09779	1.95888	1.4745	2.36901	2.4361	0.0338154	0.00727449	0.119685	0.243798
Drap1	6	68.8146	59.9757	51.4336	7.43174	69.614	47.4757	34.114	41.3529	25.929	19.1411	80.2108	67.6954	64.1108	62.7206	61.959	64.1256	42.4435	55.672	45.0267	42.2627	0.857922	0.885963	0.802261	0.11849	1.12355	0.740355	0.803751	0.742796	0.575858	0.452908	0.0305521	0.0180581	0.424925	0.209855
Fam133b	6	14.9463	23.6845	47.1221	10.4919	92.2164	80.8425	43.0735	47.6721	40.0475	16.6295	11.1814	15.5521	27.519	39.1091	35.4952	50.8893	18.4371	28.8403	11.73	14.8865	1.33671	1.52291	1.71235	0.268273	2.598	1.58859	2.33624	1.65297	3.4141	1.11709	0.0138421	0.00067186	0.909032	0.669703
Gdpd1	6	19.0746	39.0972	17.6717	6.89649	41.8651	63.4413	30.6977	31.6658	48.6091	29.5869	10.1775	13.9277	13.254	16.2353	14.9046	18.5286	13.417	15.3744	15.7744	15.4077	1.87419	2.80715	1.33331	0.424783	2.80887	3.42397	2.28798	2.05965	3.08153	1.92026	0.00145654	0.000104171	0.398052	0.850833
Mesdc2	6	86.6519	92.9148	57.1508	13.1014	61.5635	88.3815	46.6147	33.6465	67.7186	24.3826	36.913	46.5232	28.5902	32.695	25.6089	34.3857	22.017	30.7532	28.5025	33.2541	2.34747	1.99717	1.99897	0.400714	2.40399	2.5703	2.11721	1.09408	2.37589	0.733221	0.00630858	0.00297445	0.124412	0.440146
Pank3	6	53.2575	48.9709	47.9957	13.7737	39.3052	50.8985	22.826	25.8496	14.7863	7.74647	48.8549	49.3028	48.265	45.6825	41.9797	42.5596	24.5169	27.9269	15.2537	12.9051	1.09012	0.993268	0.994419	0.301509	0.936291	1.19593	0.931029	0.925616	0.969361	0.600266	0.0383676	0.0308685	0.602431	0.662221
Psmb3	6	91.3815	114.74	113.007	16.3111	98.9517	94.147	103.824	82.1366	113.073	99.4864	80.4281	63.7018	68.7026	53.3823	63.4869	54.2546	64.3074	61.1492	68.5412	48.8103	1.13619	1.8012	1.64486	0.305552	1.55862	1.73528	1.61449	1.34322	1.64971	2.03823	0.0243312	0.00779725	0.81122	0.378753
Slc39a13	6	20.1394	30.8133	9.51289	10.4999	31.9407	33.2697	21.0786	13.9322	21.1662	15.3537	12.6366	10.5583	10.4542	10.3197	13.9369	15.9635	12.7859	13.2184	15.9085	14.4548	1.59373	2.91839	0.909962	1.01747	2.29182	2.08411	1.64858	1.054	1.3305	1.06219	0.0294542	0.0231268	0.0932756	0.695171
Sra1	6	120.502	49.6478	93.0137	19.5207	75.3137	105.083	84.7476	83.5543	72.6474	56.2242	59.1882	65.1572	66.738	57.1677	49.1568	50.9563	44.5086	47.4428	45.8583	45.0689	2.03591	0.761969	1.39372	0.341465	1.53211	2.06222	1.90407	1.76116	1.58417	1.24752	0.0446768	0.00442437	0.705559	0.253419
Stk17b	6	80.848	58.3698	55.692	7.37646	30.1013	20.4647	14.705	20.2971	24.5106	28.3668	30.3046	34.8484	29.1041	31.8362	10.299	12.3109	7.98975	7.08213	17.8081	18.5304	2.66785	1.67496	1.91354	0.2317	2.92275	1.66232	1.84049	2.86596	1.37637	1.53083	0.000365331	0.000306005	0.716528	0.075554
Tmed1	6	71.5421	29.5648	22.4183	7.42331	40.9145	37.9375	37.3855	36.313	55.9102	43.7015	27.6032	28.1094	19.2367	21.4798	22.2694	20.0262	28.7509	26.8397	33.3705	25.0922	2.5918	1.05178	1.16539	0.345595	1.83725	1.89439	1.30033	1.35296	1.67544	1.74164	0.00656856	0.00254968	0.267796	0.30164
Vma21	6	98.7962	66.6134	110.566	23.4314	134.733	127.233	101.104	91.5174	72.6676	107.072	52.2595	39.9268	70.1077	59.0749	67.1151	53.7481	55.0851	56.5567	75.3995	73.2399	1.89049	1.66839	1.57709	0.396639	2.00749	2.3672	1.83541	1.61815	0.963768	1.46194	0.011737	0.00246927	0.55451	0.134632
Wdr77	6	45.6458	30.8015	22.0001	7.47654	37.5504	36.446	23.091	22.6474	8.91806	6.49848	20.1208	16.309	15.3742	14.1557	17.2423	15.34	12.5342	11.8407	6.82109	6.24734	2.26859	1.88862	1.43097	0.528163	2.1778	2.37589	1.84224	1.91267	1.30742	1.0402	0.0118383	0.00669423	0.661629	0.0600618
Arrdc1	6	45.502	26.2328	20.5032	11.7679	22.4996	30.533	12.1887	8.91159	21.0552	9.9276	15.5181	16.0342	14.1365	12.4942	9.98284	10.7685	7.1605	8.63592	8.56415	6.18223	2.93219	1.63605	1.45038	0.941864	2.25383	2.8354	1.70222	1.03192	2.45852	1.60583	0.0789417	0.0336781	0.035941	0.151601
Smim3	6	25.9084	7.18474	29.575	65.2872	152.586	250.242	47.9502	25.1503	30.3712	73.7704	12.791	12.0863	51.646	40.7318	59.0651	66.1726	23.5718	28.6809	38.045	34.4065	2.02553	0.594456	0.572648	1.60286	2.58334	3.78166	2.03422	0.8769	0.798297	2.14408	0.647277	0.00201202	0.00773151	0.878671
Spg7	6	14.289	13.6384	16.9434	5.27547	24.9759	22.5957	12.5462	10.9677	14.0235	16.3634	18.4916	20.0819	18.5704	18.0774	17.1864	18.7078	16.6393	17.4927	16.5507	16.7243	0.77273	0.67914	0.912387	0.291826	1.45324	1.20782	0.754013	0.626986	0.847308	0.978418	0.273831	0.0010709	0.00458115	0.0802199
Polr2h	6	34.7386	16.3769	19.8274	15.757	35.0726	33.5531	7.0722	13.4889	8.14449	20.0736	26.6444	19.3362	22.3863	21.6586	18.0359	18.4923	8.36112	9.12615	5.85133	6.84935	1.30379	0.846958	0.885696	0.727514	1.9446	1.81443	0.845845	1.47804	1.3919	2.93072	0.469453	0.0211908	0.0843479	0.0322505
Fam134a	6	46.8289	68.499	46.2112	14.3941	74.1804	55.6686	31.4294	32.637	44.6402	39.8206	61.192	58.3678	51.0961	50.57	49.6844	53.4594	42.2394	42.4704	63.2091	58.1166	0.765279	1.17358	0.904397	0.284636	1.49303	1.04133	0.744077	0.768465	0.706229	0.685184	0.0275622	0.00340978	0.0272248	0.988552
Hcst	6	53.0771	31.2778	42.9169	5.01563	94.8943	97.4047	28.2419	27.9088	38.8873	43.3385	20.7059	18.3593	18.8121	19.2895	21.5289	16.5887	14.6517	15.621	15.8173	11.1933	2.56338	1.70365	2.28134	0.260019	4.40777	5.87174	1.92756	1.78662	2.45852	3.87181	0.0170665	8.95009e-06	0.00356036	0.152318
Cd151	6	108.806	104.184	87.4899	9.31188	69.6653	65.0386	35.7154	20.593	60.1643	84.0716	39.6366	41.9863	30.6927	25.2013	22.6496	24.7545	18.5421	14.6025	22.3969	20.7395	2.7451	2.48137	2.85052	0.369501	3.07578	2.62735	1.92618	1.41024	2.68627	4.05369	0.00499172	0.00283843	0.0963232	0.0161391
2210016F16Rik	7	38.2641	42.0201	43.0968	20.8273	12.4481	17.7399	23.7947	16.3435	37.6783	23.0721	43.6381	39.676	30.4577	27.6391	27.2779	27.4056	19.3308	21.8116	20.4659	20.72	0.876851	1.05908	1.41497	0.753543	0.456343	0.647311	1.23092	0.749304	1.84103	1.11351	0.798844	0.0660583	0.0211456	0.080362
2700060E02Rik	7	51.2443	62.1718	31.6855	47.6173	29.3416	14.8486	58.8803	60.1083	62.5742	46.1335	73.3	66.2152	67.4766	50.9729	63.5289	55.1947	67.6558	68.37	77.8497	65.5788	0.699103	0.938935	0.469578	0.934168	0.461862	0.269023	0.870292	0.879162	0.803782	0.703482	0.546966	0.0507135	0.000175193	0.729988
Abhd17b	7	16.1589	27.3844	10.2476	11.5371	26.6869	9.7113	15.2854	23.8196	14.7329	23.0051	18.0447	14.1054	12.6809	11.2521	20.1671	20.9977	11.4048	13.0824	12.6086	13.9046	0.895496	1.94141	0.808117	1.02533	1.32329	0.462492	1.34026	1.82074	1.16848	1.65449	0.351017	0.680172	0.00784926	0.721237
Adpgk	7	70.9785	39.9454	42.4975	50.5017	24.0041	19.357	32.0682	26.0069	14.6832	16.259	26.5576	22.6091	23.2466	19.3886	19.3844	19.658	13.0535	11.3825	7.84412	7.78661	2.67263	1.76678	1.82812	2.60471	1.23832	0.984689	2.45667	2.28481	1.87187	2.08807	0.912733	0.0673635	0.00212133	0.336482
Aff1	7	10.9876	13.5943	13.1858	13.2582	6.28142	8.81663	63.5871	65.0904	47.0624	48.2024	6.505	6.58634	7.36384	7.76788	6.77213	7.87365	32.4226	41.0672	24.4976	31.7229	1.6891	2.06402	1.79061	1.7068	0.927541	1.11976	1.96119	1.58497	1.9211	1.51948	0.930542	0.140194	0.0196921	0.833492
Aftph	7	24.7095	21.0957	24.7202	17.4205	11.0564	22.3109	53.0277	49.9493	37.7531	45.3389	31.134	31.967	32.8628	28.5208	30.8802	32.1113	62.9926	65.9461	61.2542	61.0725	0.79365	0.659923	0.752225	0.610799	0.358043	0.694798	0.841808	0.757426	0.616335	0.742377	0.828191	0.323825	0.035942	0.702377
Agps	7	38.3947	29.8986	36.5973	39.8734	16.3147	18.2799	19.2362	24.8474	10.9111	22.6051	36.1465	38.6099	31.7901	29.0409	23.4655	23.1474	16.7442	19.1851	18.0095	18.62	1.06219	0.774375	1.15122	1.37301	0.695266	0.789719	1.14883	1.29514	0.605851	1.21402	0.266162	0.125384	0.0372249	0.224132
Ahcyl2	7	35.9027	30.7223	29.6644	35.6719	13.2334	24.5715	33.2236	38.1714	25.2522	29.122	24.5258	24.0136	21.4706	20.2139	17.4624	20.4772	19.4207	21.813	18.1024	17.6398	1.46388	1.27937	1.38163	1.76472	0.757819	1.19994	1.71074	1.74994	1.39497	1.65092	0.639675	0.165746	0.0116838	0.569392
Aim1	7	16.5203	13.8287	13.7362	6.70703	6.17745	8.03734	35.5576	35.0435	44.8285	38.2769	12.7034	14.6252	12.3336	11.138	11.4545	13.4109	30.797	35.8181	40.0195	44.0832	1.30047	0.945539	1.11373	0.602173	0.539304	0.599313	1.15458	0.978375	1.12017	0.868287	0.320162	0.294269	0.00802378	0.870771
Ap3b1	7	25.1533	38.8533	29.6969	22.5696	18.4596	18.7093	64.0425	59.7881	75.5062	85.1648	18.9754	21.9526	20.6509	19.8812	17.838	17.8796	32.3264	37.2872	40.4003	44.5436	1.32557	1.76987	1.43804	1.13522	1.03485	1.04641	1.98112	1.60345	1.86895	1.91194	0.64282	0.599394	0.0220512	0.858832
Apaf1	7	11.6325	8.98624	8.22013	6.1243	5.82554	8.18583	22.6053	25.2727	23.3763	14.5081	10.9877	14.8657	15.485	14.6419	14.0823	15.0786	28.7193	30.6007	24.5673	27.1662	1.05868	0.604496	0.530846	0.418271	0.413678	0.542878	0.787111	0.825888	0.95152	0.534051	0.0776795	0.951357	0.0316444	0.763511
Appl1	7	26.8815	32.4734	25.7816	11.9704	36.5584	33.5755	88.1889	89.1277	57.8437	53.1038	16.0113	16.9597	16.0985	15.2979	31.5456	32.1658	48.2258	53.5902	38.8568	38.2936	1.6789	1.91474	1.60149	0.782483	1.15891	1.04383	1.82867	1.66314	1.48864	1.38676	0.161996	0.950448	0.0468515	0.398915
Arglu1	7	30.5734	6.88871	30.5377	17.3346	14.4691	17.718	27.5847	22.2591	22.3999	28.8044	11.4216	12.1555	7.88085	11.8519	8.39456	13.0232	6.63792	11.8395	6.04106	9.28297	2.6768	0.566715	3.87492	1.46261	1.72363	1.3605	4.15562	1.88007	3.70794	3.10293	0.0687418	0.327743	0.0170562	0.856288
Bcl6	7	66.5756	65.7338	37.0243	28.7597	11.2847	7.06631	84.4904	91.1413	35.1624	46.5026	26.5474	23.9912	14.8226	14.2276	5.98974	6.22531	33.7649	39.8538	22.807	23.3027	2.5078	2.73992	2.49783	2.02141	1.884	1.13509	2.50231	2.28689	1.54174	1.99559	0.736464	0.27588	0.0347924	0.168201
Brox	7	29.7526	31.2476	30.3501	12.9211	19.5287	11.7395	52.956	41.377	35.6196	45.4859	31.1412	31.3297	25.1291	22.372	25.7874	24.0482	35.2162	35.8024	40.8793	34.845	0.95541	0.997382	1.20777	0.577556	0.757294	0.488163	1.50374	1.15571	0.871336	1.30538	0.626255	0.390283	0.00180122	0.432399
Casp8	7	36.7036	43.1085	37.7903	15.5057	12.4127	18.7682	98.0981	119.464	134.14	131.539	34.7183	39.143	29.9413	30.3047	19.2393	22.9863	66.1885	79.4879	83.1395	93.6743	1.05718	1.10131	1.26214	0.51166	0.645175	0.816494	1.4821	1.50292	1.61343	1.40422	0.337487	0.865749	0.00276382	0.953239
Cdkn1b	7	27.558	64.7765	31.9573	28.7696	14.7211	34.4759	16.5153	16.9851	15.3833	25.0568	16.7984	16.2784	13.3953	13.7352	18.6053	19.8985	6.57747	7.02506	9.86175	9.28264	1.64051	3.9793	2.38571	2.0946	0.791232	1.73259	2.51089	2.41779	1.55989	2.69931	0.834216	0.0976023	0.00466473	0.437769
Cetn2	7	34.7896	51.1743	26.4754	40.022	20.3618	9.35021	19.5961	20.5566	24.824	5.32027	12.9617	18.9556	12.6327	14.5613	10.1185	13.4199	8.85755	11.0214	7.369	9.83868	2.68403	2.69969	2.09578	2.74852	2.01233	0.696742	2.21236	1.86515	3.3687	0.540751	0.846551	0.0875903	0.0469257	0.05816
Chchd3	7	45.9397	68.1572	33.2126	39.0705	16.7488	19.5236	26.7823	24.5275	21.5411	10.3876	46.2922	49.6074	49.8538	48.1574	35.3183	40.2025	25.7618	32.5059	25.714	26.7066	0.992384	1.37393	0.666201	0.811307	0.474225	0.485632	1.03961	0.754553	0.83772	0.388951	0.165319	0.218734	0.0141623	0.147764
Cnp	7	30.3492	37.6044	34.8899	11.7157	10.8656	11.4759	83.8948	98.2036	124.141	121.348	20.2207	20.9903	17.5769	18.5235	15.989	16.0932	38.9666	45.2262	59.7038	61.637	1.5009	1.79151	1.98499	0.632478	0.679566	0.713089	2.153	2.17139	2.07927	1.96876	0.242693	0.235017	5.44649e-06	0.717159
Cript	7	137.468	66.1736	61.19	66.6675	52.3736	30.0627	70.0856	53.714	42.5673	76.894	50.2149	52.139	50.5449	47.7598	45.0606	44.978	29.3475	30.5987	30.6493	34.691	2.7376	1.26918	1.21061	1.39589	1.16229	0.668386	2.38813	1.75544	1.38885	2.21654	0.344949	0.316201	0.00124484	0.489587
Dctn4	7	55.977	38.5727	41.3083	70.1014	19.663	45.0009	50.6488	49.765	57.0025	43.1849	20.5175	23.9191	18.0145	17.8273	19.4767	21.6622	18.3511	21.1602	25.2018	25.8596	2.72826	1.61263	2.29306	3.93225	1.00957	2.07739	2.75999	2.35182	2.26184	1.66998	0.282225	0.0515209	0.0144677	0.217177
Eloa	7	17.4145	15.045	14.5269	16.203	13.9002	7.24561	37.0644	40.3117	39.258	33.9916	31.4612	33.1486	27.4168	27.5223	22.3025	25.2284	41.6317	53.8335	47.7308	55.7242	0.553522	0.453865	0.529856	0.588722	0.623258	0.287201	0.890293	0.748821	0.822488	0.609998	0.670958	0.4769	0.0102461	0.720938
Exosc5	7	63.029	58.2625	69.8451	20.0625	14.8854	36.7404	30.2884	23.6151	12.9624	15.0018	36.2646	34.1159	27.3631	26.7195	23.1849	27.9155	15.4199	20.0059	11.2899	11.6878	1.73803	1.70778	2.55253	0.750857	0.642028	1.31613	1.96424	1.18041	1.14814	1.28354	0.491574	0.302013	0.0337201	0.414518
Fkbp3	7	99.9585	105.077	91.1068	66.7795	31.2929	54.7849	57.6508	59.4236	43.6006	18.6889	37.6269	40.3704	35.3534	33.117	27.0395	30.9364	18.4002	25.6954	15.6622	14.7897	2.65657	2.60283	2.57703	2.01647	1.1573	1.77089	3.13317	2.31262	2.78381	1.26364	0.76621	0.228424	0.00907435	0.0811279
Fndc3a	7	18.1918	29.7885	15.4923	21.12	9.59636	14.2241	197.843	206.027	167.557	178.139	17.573	21.5743	18.1318	19.1554	18.8553	20.6815	140.319	155.108	139.73	151.521	1.03521	1.38074	0.854428	1.10256	0.508947	0.687768	1.40995	1.32829	1.19915	1.17567	0.571131	0.134522	0.000299198	0.586541
Herpud2	7	28.8888	18.5148	24.916	15.5301	10.0822	8.43286	33.743	23.2657	31.6073	15.8061	17.9298	16.7436	15.0256	16.0931	13.8449	13.6178	18.5098	22.943	16.3031	17.2248	1.61121	1.10578	1.65824	0.965019	0.728226	0.619252	1.82298	1.01406	1.93872	0.917637	0.886373	0.0893599	0.00582688	0.893827
Hnrnpd	7	131.626	138.706	119.646	96.7418	77.93	96.0564	107.728	107.425	63.4338	68.7105	19.7271	15.7229	17.266	14.9768	17.3036	15.7476	11.0682	13.8824	8.52725	9.54262	6.67232	8.82187	6.92957	6.45946	4.50368	6.09975	9.73314	7.73819	7.43895	7.20038	0.916629	0.604039	0.0318201	0.234698
Ift22	7	50.5921	53.7811	51.335	27.6224	28.3769	8.6872	55.66	52.7496	52.7171	52.9609	28.6941	27.6241	22.1697	21.7913	19.9246	19.9493	27.9662	31.9039	42.3898	41.306	1.76315	1.94689	2.31555	1.26759	1.42422	0.435464	1.99026	1.65339	1.24362	1.28216	0.85583	0.051429	0.00195782	0.141222
Ints11	7	24.7096	17.5515	17.4848	14.4196	6.56505	12.3938	13.6392	16.2716	9.14713	15.0298	19.0783	19.1657	16.4039	12.6036	13.8937	12.8669	11.2083	12.0976	9.30145	10.4858	1.29517	0.915776	1.06589	1.14408	0.472521	0.963227	1.21689	1.34503	0.98341	1.43335	0.914126	0.155278	0.00862262	0.918755
Irf2	7	46.1232	63.1275	46.9891	16.8716	16.2733	9.19723	157.508	164.17	78.4858	79.6197	13.3792	13.5345	13.2697	9.70889	5.79352	5.94015	30.7895	44.5813	20.7428	26.8858	3.44737	4.66419	3.54108	1.73775	2.80887	1.54832	5.11564	3.68248	3.78375	2.9614	0.236464	0.719705	0.00245773	0.197838
Ivns1abp	7	45.882	62.6396	60.8805	14.23	38.2726	33.6348	40.0631	42.636	13.7911	7.68483	139.396	148.779	136.222	105.273	109.71	101.246	48.6915	50.7336	19.2064	19.2264	0.329148	0.421023	0.446923	0.135172	0.348854	0.332209	0.822794	0.84039	0.718045	0.399702	0.776106	0.963783	9.95859e-05	0.27674
Larp4	7	18.0255	9.99743	15.3638	9.53882	8.08837	9.47123	12.944	14.2318	7.60697	7.78933	13.0437	13.4848	12.9356	10.9706	12.0942	11.0493	9.33895	9.77472	5.81082	5.86236	1.38194	0.741385	1.18772	0.86949	0.668779	0.857176	1.38602	1.45598	1.30911	1.3287	0.954988	0.42194	0.0104904	0.812483
Ldah	7	41.3504	47.6322	37.5198	27.0519	7.58243	21.5057	24.7249	26.2457	24.2366	29.9676	13.965	13.6075	11.9707	12.2277	10.639	9.10752	8.60286	9.49932	8.98445	9.01936	2.96101	3.50044	3.13431	2.21235	0.712699	2.36132	2.87404	2.7629	2.69761	3.32258	0.658669	0.0632616	0.00161089	0.879357
Ltbr	7	18.7757	36.1002	14.2886	16.5597	9.12709	12.09	23.6295	15.7962	39.6178	28.9319	44.0966	37.7825	39.4926	40.355	31.6814	35.6887	25.4062	29.6263	45.4436	40.5055	0.425786	0.955472	0.361804	0.41035	0.28809	0.338762	0.930072	0.533179	0.871802	0.714272	0.102959	0.569107	0.00126037	0.408656
Mak16	7	26.4101	34.6662	37.517	45.9204	18.7635	31.2907	24.4393	25.0676	8.2558	12.3857	15.9257	23.4645	23.1461	22.7509	20.7435	29.3247	10.7471	16.3636	5.29255	7.01454	1.65833	1.47739	1.62088	2.0184	0.904552	1.06704	2.27403	1.53191	1.55989	1.76572	0.601863	0.0965522	0.00940462	0.520991
Mmadhc	7	50.8856	42.3337	42.0629	31.8359	16.7313	32.54	55.8566	85.1666	61.7077	91.2538	25.8028	25.5054	28.0425	21.9366	26.717	29.0833	36.7468	39.3563	35.012	33.5266	1.9721	1.65979	1.49997	1.45127	0.62624	1.11886	1.52004	2.16399	1.76247	2.72183	0.605827	0.109567	0.00152286	0.516496
Mospd2	7	47.2098	35.0974	38.2205	23.5399	21.9726	15.5229	29.9302	30.2272	29.4371	43.658	22.6344	29.0094	20.4545	22.1624	18.1524	20.2944	18.2941	18.9447	20.0426	20.5807	2.08575	1.20986	1.86856	1.06216	1.21045	0.764886	1.63606	1.59555	1.46873	2.12131	0.735254	0.326758	0.0335469	0.747145
Mrps25	7	39.4819	109.489	57.7813	30.9954	11.9244	49.2815	30.9148	32.4302	32.0419	38.9143	38.7166	35.6452	28.3395	24.4295	26.6845	26.2104	16.9558	19.0434	14.0876	14.6308	1.01977	3.07162	2.0389	1.26877	0.446866	1.88023	1.82326	1.70296	2.27448	2.65975	0.90605	0.116088	0.00715438	0.318048
Mvb12a	7	63.4499	41.0561	40.2385	18.8959	14.0198	38.6278	38.4317	44.1729	36.0627	32.848	37.6308	33.5744	26.4659	30.2487	24.5724	28.4569	24.3314	29.6875	31.838	30.2889	1.68611	1.22284	1.52039	0.624686	0.570552	1.35741	1.57951	1.48793	1.13269	1.08449	0.238414	0.832257	0.0187344	0.202988
Nadk	7	73.3874	55.4736	72.9637	51.005	56.1008	61.2793	98.7997	99.1997	145.693	116.871	83.5239	82.6763	82.136	74.9075	80.9545	88.8821	81.444	94.5494	95.1174	87.4338	0.878639	0.670974	0.888328	0.680907	0.692992	0.689445	1.2131	1.04918	1.53172	1.33668	0.95786	0.769834	0.0340397	0.246006
Ntan1	7	24.3643	22.3664	21.7383	38.1079	25.4467	9.08851	13.6832	19.0298	9.84864	13.0867	27.9976	25.8672	25.4678	22.7979	23.2357	21.3452	13.0916	14.9086	12.845	12.7738	0.870226	0.864663	0.853562	1.67155	1.09516	0.425787	1.04518	1.27643	0.766726	1.02449	0.29609	0.124393	0.0445864	0.50446
Ogt	7	24.0612	16.7844	21.52	13.6892	8.06968	26.8339	25.4334	22.4742	16.2838	16.7018	15.2467	19.472	12.0463	13.35	12.631	13.7047	13.7871	12.6028	13.2545	13.8456	1.57812	0.861977	1.78644	1.0254	0.638881	1.958	1.84472	1.78327	1.22855	1.20629	0.6315	0.575231	0.0257626	0.0978877
Olfm1	7	54.3603	22.6122	36.1978	32.1055	12.3868	22.3146	27.6671	36.2791	35.8447	31.5825	74.043	64.8383	49.7437	55.0968	45.9644	50.0103	36.5873	45.3857	52.0328	54.7645	0.734172	0.348747	0.727685	0.582712	0.269486	0.446201	0.756193	0.799351	0.688886	0.576697	0.393996	0.0686134	0.00104835	0.640224
Orc3	7	27.3186	17.5759	27.1654	14.3189	10.8282	9.28797	18.3365	16.0294	11.1018	14.0929	15.5295	18.56	15.3982	14.1202	11.1286	12.6622	10.3215	11.158	9.62778	10.6617	1.75914	0.946973	1.76419	1.01407	0.973008	0.733519	1.77653	1.43659	1.1531	1.32183	0.899618	0.221257	0.00917929	0.305166
Pank2	7	39.1729	21.4021	18.6876	26.0779	7.21468	19.878	12.985	15.8917	5.48305	8.81346	22.6385	22.3158	17.844	16.1676	16.4036	15.8448	10.9676	11.8242	9.4845	8.98458	1.73037	0.959055	1.04728	1.61297	0.439823	1.25455	1.18394	1.34401	0.578107	0.980953	0.913959	0.0986812	0.0248679	0.118244
Pbrm1	7	12.9304	12.4026	15.1655	13.9151	6.82601	9.28604	14.8654	13.0935	8.55965	6.42076	13.9208	16.4413	14.2419	12.8261	12.409	12.9321	12.4789	14.2588	8.36503	9.0043	0.928854	0.754354	1.06485	1.08491	0.550085	0.718061	1.19124	0.918274	1.02327	0.713078	0.389729	0.109922	0.028045	0.490434
Pik3cg	7	31.6584	34.2067	26.0556	12.2324	17.0994	10.8722	13.0205	11.534	19.2431	15.3184	29.5972	30.85	27.0808	24.1813	17.2327	17.0418	7.87869	8.70635	12.2146	13.7949	1.06964	1.10881	0.96214	0.505864	0.992265	0.637971	1.65262	1.32478	1.57541	1.11044	0.141386	0.583538	0.00893385	0.636886
Ppp1r10	7	9.63978	11.179	40.2368	37.9831	6.22615	11.5115	28.5454	32.1376	17.1216	21.4299	8.06582	6.80116	18.9449	18.6844	7.17479	6.10222	13.8876	16.7962	7.2821	8.07526	1.19514	1.64369	2.12389	2.03288	0.867782	1.88645	2.05546	1.91339	2.35119	2.65377	0.205063	0.175535	0.0482934	0.516133
Ppp1r12a	7	23.289	25.9768	27.7664	19.7577	13.6433	6.99818	39.8456	38.349	35.794	29.2552	14.8102	18.387	16.8355	17.287	11.5229	16.4046	23.0763	30.3859	24.2474	27.9403	1.5725	1.41279	1.64928	1.14293	1.18401	0.426599	1.72669	1.26207	1.4762	1.04706	0.841593	0.0629574	0.00234311	0.477173
Ppp2r2a	7	80.765	61.6904	92.7339	111.401	39.7375	101.274	131.644	129.752	71.4229	101.1	27.0571	26.8605	24.8362	25.4498	31.1945	35.0279	36.5646	49.0584	36.2772	40.0627	2.98499	2.2967	3.73382	4.3773	1.27387	2.89125	3.60031	2.64486	1.96881	2.52354	0.207918	0.0584343	0.0284045	0.143242
Prkaa1	7	20.8526	45.2334	28.5643	24.5219	9.61682	22.1998	23.6704	21.5919	20.642	20.4901	19.4132	19.927	16.3404	15.8976	15.268	14.0156	11.2911	14.2639	13.6172	13.1491	1.07414	2.26995	1.74808	1.54249	0.629868	1.58393	2.09637	1.51375	1.51587	1.55828	0.774907	0.156609	0.0116118	0.510591
Rasa4	7	36.7901	39.8559	43.6974	33.2709	24.4925	32.1471	120.016	128.613	180.57	179.677	29.4637	28.8934	25.5606	28.5679	31.1712	36.4121	87.2774	101.133	124.953	127.66	1.24866	1.37941	1.70956	1.16463	0.785742	0.882867	1.3751	1.27172	1.4451	1.40747	0.781808	0.139817	0.0468145	0.686094
Rbm5	7	30.0107	32.0499	17.2504	10.3783	8.23738	15.7884	32.971	33.2648	35.1801	23.7423	16.6852	20.8374	12.5089	12.8095	12.7824	14.7292	21.1197	23.342	19.74	23.2974	1.79865	1.53809	1.37904	0.810204	0.64443	1.07191	1.56115	1.4251	1.78217	1.0191	0.176902	0.514071	0.012845	0.652481
Rfc3	7	27.7352	44.9335	23.884	18.2083	7.77828	9.5875	22.1534	18.8937	8.55594	19.8041	30.5	27.2542	22.8023	19.8056	15.8864	13.6575	17.1686	17.9082	9.49466	10.2367	0.90935	1.64868	1.04744	0.919353	0.48962	0.701997	1.29034	1.05504	0.901133	1.93461	0.567783	0.158173	0.0071712	0.429068
Rsrc2	7	14.4925	28.3241	23.6336	25.0423	22.0639	9.06532	30.3984	30.37	17.7979	23.5802	17.4493	27.482	19.8526	22.3831	19.0176	23.0998	19.1104	26.7504	16.6317	19.5828	0.830551	1.03064	1.19045	1.11881	1.16019	0.392442	1.59068	1.13531	1.07012	1.20413	0.461672	0.131524	0.00703761	0.573484
Rsrp1	7	85.1097	75.1411	18.5056	32.1705	34.0984	35.5663	94.5104	108.473	69.2282	80.2942	27.4713	32.7057	9.13359	9.48267	15.7814	22.3449	34.3064	35.084	27.0512	38.2716	3.09813	2.29749	2.0261	3.39255	2.16067	1.59169	2.75489	3.0918	2.55916	2.09801	0.997692	0.422161	0.0495082	0.259478
Sarnp	7	32.4658	40.168	43.7121	17.9355	19.6107	8.68369	28.1943	29.8996	17.5653	29.4892	18.7584	26.2923	16.6085	20.8144	14.5868	22.4591	12.6413	22.3439	13.0726	17.7163	1.73073	1.52775	2.63191	0.861691	1.34442	0.386645	2.23033	1.33816	1.34367	1.66453	0.810285	0.071306	0.00106428	0.559962
Sec23ip	7	21.0375	14.4049	15.4169	24.3467	16.7529	8.62955	26.1492	37.6503	26.7925	35.6276	9.89163	10.7888	8.86393	9.16207	10.995	11.8566	17.1553	19.8257	18.0643	20.1457	2.1268	1.33517	1.73928	2.65734	1.52368	0.727824	1.52426	1.89906	1.48318	1.76849	0.428906	0.0533151	0.0472517	0.822334
Sf3b4	7	49.4532	40.9727	33.4529	24.4621	21.9165	22.1726	31.6385	26.8676	28.6279	14.4185	15.0494	9.01045	12.4642	8.48083	11.3991	8.46979	7.48369	8.08015	6.83473	5.70863	3.28605	4.54725	2.68393	2.8844	1.92265	2.61785	4.22767	3.32514	4.1886	2.52574	0.466654	0.603523	0.028879	0.330103
Slc25a22	7	25.7645	21.881	17.1562	13.3907	13.548	9.33195	150.502	176.116	220.856	172.748	10.051	6.40222	6.30919	6.34633	6.59184	7.72776	40.3955	46.8132	65.722	61.5353	2.56338	3.41772	2.71924	2.10999	2.05527	1.20759	3.72572	3.7621	3.36045	2.8073	0.630042	0.340355	0.000537646	0.327411
Smad2	7	46.3049	35.2303	31.1726	38.1469	29.968	10.5504	15.8214	19.2094	20.8773	12.8267	23.1747	24.6978	23.8718	21.4788	24.4795	22.2649	11.5486	16.1843	13.1992	14.6975	1.99808	1.42645	1.30583	1.77602	1.22421	0.473859	1.36999	1.18691	1.58171	0.87271	0.824687	0.0536275	0.0382632	0.750612
Srgap2	7	44.3269	28.6151	26.1756	32.0452	7.2007	21.3369	59.8028	59.7244	61.3325	75.0957	20.8335	24.8388	18.2567	20.4073	15.6474	15.8247	36.9393	42.4788	40.9379	48.0541	2.12768	1.15203	1.43375	1.57028	0.460186	1.34832	1.61895	1.40598	1.49818	1.56273	0.954842	0.0503044	0.00402912	0.941595
Srpk1	7	34.4774	27.5713	28.0683	31.8224	15.5156	18.5865	20.6267	21.7935	11.2789	6.64758	18.7462	21.3967	18.8077	17.1469	17.9723	19.0129	12.315	15.023	8.64346	8.08374	1.83917	1.28858	1.49238	1.85588	0.863306	0.977571	1.67492	1.45067	1.30491	0.82234	0.752311	0.0976609	0.0260374	0.0941107
Stag2	7	57.8487	45.7847	44.345	59.693	24.3946	36.7058	76.5858	74.1914	50.9837	41.3734	43.1748	52.4058	49.306	45.8734	45.7007	47.4246	68.1868	76.4682	56.9428	58.8706	1.33987	0.873656	0.899383	1.30125	0.533789	0.773984	1.12318	0.970226	0.895349	0.702785	0.950756	0.110484	0.0328009	0.28076
Tfe3	7	64.365	71.0892	62.495	89.7664	29.5664	28.7261	44.7742	43.0907	66.3457	73.3265	29.7028	24.3904	28.6628	30.4003	22.8804	22.6453	17.1274	22.4705	33.4737	36.9037	2.16697	2.91464	2.18036	2.95281	1.29222	1.26852	2.61418	1.91766	1.98203	1.98697	0.860062	0.0681971	0.0187551	0.542219
Tfpi	7	23.2212	23.9183	26.0867	15.0469	7.44269	39.3037	22.921	32.2025	7.77746	27.2255	19.4191	19.5551	16.8739	17.0033	14.5734	16.0536	11.5238	13.1545	10.7168	12.9016	1.19579	1.22312	1.54598	0.884938	0.510704	2.44827	1.98902	2.44801	0.725725	2.11025	0.959965	0.885855	0.00545258	0.0540166
Thoc5	7	21.7031	21.1177	15.0675	22.1639	5.33912	22.3599	20.0131	20.452	24.1025	21.2365	11.5204	10.8511	9.14727	9.52026	9.31395	8.476	9.42881	11.4183	8.62357	10.1078	1.88388	1.94614	1.64722	2.32808	0.573239	2.63803	2.12255	1.79116	2.79495	2.10101	0.86591	0.164213	0.028101	0.545893
Tial1	7	35.4175	58.9304	31.7096	22.0498	28.8245	17.1715	26.4767	29.2127	14.6535	13.609	24.0243	28.4942	23.1996	21.8059	23.9215	18.6521	12.2	15.0772	8.71007	8.8084	1.47424	2.06815	1.36682	1.01118	1.20497	0.92062	2.17022	1.93754	1.68236	1.545	0.271379	0.819246	0.0073356	0.258339
Trappc2l	7	133.2	101.97	61.3912	80.8405	34.725	47.8376	46.5264	50.9924	92.3668	39.5921	64.3052	53.7041	52.8076	46.1808	49.8251	52.9601	33.6095	38.4056	34.128	33.5578	2.07137	1.89874	1.16254	1.75052	0.696938	0.903276	1.38432	1.32773	2.70648	1.17982	0.396511	0.101073	0.0278394	0.329059
Ubap1	7	34.0091	18.2908	21.96	8.95958	12.7171	10.7504	21.5531	17.6741	12.081	19.6779	19.0798	19.5365	17.6923	19.0764	16.7208	18.6609	16.2637	18.6965	20.1631	21.5347	1.78246	0.936235	1.24122	0.469668	0.760556	0.576092	1.32523	0.945316	0.599164	0.913775	0.0958672	0.78045	0.0361516	0.150626
Ube2a	7	135.693	116.223	175.157	31.1638	37.5732	69.015	74.3867	87.8149	60.405	91.485	42.1574	28.081	31.7009	33.2922	33.956	38.6518	22.1622	33.8002	29.6438	28.9783	3.21873	4.13883	5.52529	0.936068	1.10653	1.78556	3.35646	2.59806	2.0377	3.15702	0.173385	0.29982	0.00259802	0.382669
Ube2k	7	159.134	107.657	134.411	89.8955	95.1427	41.8882	70.5548	102.985	106.597	51.8425	62.7156	61.9619	64.91	61.2366	57.443	56.9819	30.287	42.4732	29.9084	36.3986	2.53739	1.73748	2.07073	1.468	1.6563	0.735114	2.32954	2.4247	3.56412	1.4243	0.638399	0.236362	0.0021718	0.585801
Ube3a	7	30.8767	39.8956	32.0186	22.5725	11.6092	15.2064	35.0407	23.9346	17.501	18.5836	25.9886	33.5636	29.0723	27.5121	25.4758	23.3439	22.7317	23.3609	17.3566	18.6492	1.18809	1.18866	1.10135	0.820458	0.455695	0.651409	1.54149	1.02456	1.00832	0.99648	0.504332	0.0942446	0.000317728	0.402827
Uchl3	7	37.455	26.439	42.3237	24.0249	25.4647	7.8931	14.7043	19.8322	5.32202	5.13277	22.2138	20.8662	20.4796	17.7461	17.7917	16.7526	10.4202	11.2519	5.94122	5.58311	1.68611	1.26708	2.06662	1.35382	1.43127	0.471157	1.41113	1.76257	0.895779	0.91934	0.663422	0.0756677	0.0199889	0.0912438
Usp4	7	29.7937	36.0389	25.4806	27.6716	10.6633	14.9092	21.5312	21.3012	23.2839	30.7966	23.7447	26.0105	24.0197	21.5959	20.0298	19.5447	19.2352	21.9693	24.0002	26.439	1.25475	1.38555	1.06082	1.28133	0.532375	0.762826	1.11937	0.969592	0.970153	1.16482	0.770839	0.0695854	0.0371166	0.768647
Xpo1	7	120.461	84.4205	90.9342	58.0839	33.9869	59.1814	35.0788	38.4296	36.368	32.5172	81.3092	87.9153	80.0949	68.5732	58.1276	52.0784	27.6647	30.6717	27.7989	26.9489	1.48151	0.960248	1.13533	0.847036	0.584695	1.13639	1.268	1.25293	1.30825	1.20663	0.541396	0.602214	0.0437698	0.929232
Zc3h15	7	14.6297	15.2137	24.1223	20.2761	7.52193	23.0797	23.6915	24.0638	20.008	16.5398	14.8322	18.3027	19.2953	17.9195	21.4842	19.6661	18.6343	23.477	14.2482	16.1572	0.986344	0.831231	1.25017	1.13151	0.350114	1.17357	1.27139	1.02499	1.40425	1.02368	0.376093	0.0575907	0.0138148	0.762991
Zwint	7	58.8215	29.1898	62.8265	44.4677	20.2587	36.6799	36.2881	39.4025	48.3885	25.408	30.0226	33.3483	29.6861	26.8693	26.6859	27.8831	20.1263	24.7574	17.4891	21.0181	1.95924	0.875301	2.11636	1.65496	0.759155	1.31549	1.80302	1.59154	2.76678	1.20886	0.263373	0.0881921	0.0253137	0.941405
1600012H06Rik	7	68.3643	80.476	38.2233	12.6568	7.04301	28.0295	29.4366	24.3785	45.7944	36.4544	35.867	34.0811	26.0376	25.6001	24.6563	29.4828	24.6486	23.3057	34.4913	32.1029	1.90605	2.36131	1.468	0.494402	0.285648	0.950707	1.19425	1.04603	1.32771	1.13555	0.00900053	0.174792	0.00409773	0.622083
Abcb1b	7	21.3518	16.2408	15.9395	9.53115	14.3714	15.5557	19.495	15.134	5.72107	9.19605	20.9751	23.2457	28.9343	24.7392	25.4603	24.7661	16.8124	16.7926	9.21118	8.0519	1.01796	0.698659	0.550886	0.385264	0.564462	0.628106	1.15956	0.901229	0.621101	1.1421	0.0377629	0.344924	0.0183086	0.65964
Dhps	7	28.8619	27.3299	19.8214	5.85385	15.7937	8.70302	24.4933	23.6894	8.25204	26.175	16.1605	14.688	13.5728	11.4158	13.2135	13.513	12.9606	14.4806	15.2137	13.7079	1.78595	1.8607	1.46037	0.512786	1.19527	0.644047	1.88983	1.63594	0.542408	1.90948	0.0322833	0.883879	0.00658652	0.0578396
Efr3a	7	45.0932	31.7026	19.8166	15.3642	16.5649	9.56966	26.9176	28.1549	19.3574	30.1577	34.3679	36.9677	34.9689	31.9449	34.0524	31.0427	38.2316	39.0839	37.3106	37.6318	1.31207	0.857576	0.566691	0.48096	0.486453	0.308274	0.704067	0.720371	0.518817	0.801387	0.0159691	0.405069	0.0106904	0.952415
Eif5	7	53.2641	34.5772	47.9046	18.7605	36.3261	31.3355	26.8852	29.7698	17.0288	27.9804	52.8276	61.8367	77.0739	74.0276	60.8559	56.3857	27.0637	32.8822	29.1425	33.6861	1.00826	0.559168	0.621541	0.253426	0.59692	0.555735	0.993404	0.905347	0.58433	0.830622	0.0340322	0.193859	0.032431	0.349396
1110004F10Rik	7	96.2577	74.9012	43.7333	61.9076	18.5341	38.8542	38.8206	39.05	23.5781	24.5444	60.3401	57.8513	48.7355	46.5967	46.3323	52.4921	38.3577	42.799	36.8574	33.4665	1.59525	1.29472	0.897362	1.32858	0.400025	0.740192	1.01207	0.912404	0.639713	0.733404	0.447437	0.0410701	0.0191763	0.335302
Cd300ld	7	98.5228	98.2278	62.4809	39.0138	7.23658	22.6572	14.761	18.9762	21.9988	7.66151	42.8087	46.3338	38.6987	40.6933	31.1501	37.2725	18.2767	18.3133	20.3639	17.2608	2.30147	2.12	1.61455	0.958729	0.232313	0.607881	0.807642	1.0362	1.08028	0.443868	0.100723	0.000700021	0.000636443	0.416018
Dnajc19	7	29.9201	38.7204	20.2396	47.7509	18.6467	7.70639	15.9971	17.2116	23.3826	9.18748	48.1832	40.4984	38.048	37.6954	36.5118	37.539	21.0349	25.1298	19.5557	21.0833	0.620964	0.956096	0.53195	1.26676	0.510704	0.20529	0.760506	0.684908	1.19569	0.43577	0.766973	0.0107334	0.00494359	0.710299
Gmfb	7	83.0121	86.9657	102.481	131.089	68.2898	52.74	64.8682	89.5367	51.8993	64.8844	54.644	63.955	52.6862	46.0052	51.9396	55.4974	34.6043	46.0848	30.9765	37.7967	1.51915	1.35979	1.94512	2.84943	1.31479	0.950315	1.87457	1.94287	1.67544	1.71667	0.130038	0.0482608	0.0280566	0.553195
Inpp5b	7	20.134	14.0673	9.94948	10.6743	6.89317	5.05112	38.6181	39.9357	52.7215	42.1752	11.314	11.2111	8.6543	8.58209	12.1137	13.2866	38.5004	42.2268	50.2907	54.5425	1.77956	1.25477	1.14966	1.24379	0.569039	0.380167	1.00306	0.945743	1.04833	0.773254	0.547138	0.00489605	0.00325126	0.87638
Isoc1	7	34.8955	44.514	37.1783	29.6777	14.1903	8.76319	38.104	44.6013	47.0422	56.9857	21.1349	21.4768	21.6778	20.2346	18.3786	19.2795	28.8332	33.3397	35.3117	33.692	1.65108	2.07266	1.71504	1.46668	0.772107	0.454535	1.32153	1.33778	1.3322	1.69137	0.72362	0.00751868	0.0020444	0.571092
Lrch3	7	18.2866	20.2844	15.6559	33.82	13.3706	6.30804	39.1624	38.6729	29.0924	36.7541	12.9203	12.8791	11.8852	12.8063	11.7373	11.5623	22.7521	27.1442	17.9564	22.0766	1.41534	1.57499	1.31725	2.64088	1.13915	0.545569	1.72126	1.42472	1.62017	1.66485	0.45315	0.0173494	0.00512729	0.869959
Luc7l2	7	41.0129	40.6818	34.2124	28.6198	10.6172	15.8453	24.5231	30.6252	31.4352	23.7783	23.9472	21.524	19.5172	19.3129	15.9858	19.1478	13.6209	17.7489	14.266	17.3143	1.71264	1.89006	1.75294	1.4819	0.664167	0.827526	1.8004	1.72547	2.20351	1.37333	0.816622	0.0328434	0.000548243	0.833843
Mndal	7	13.9571	15.7489	11.7203	26.9239	13.4974	13.0159	245.129	253.22	249.368	268.915	10.0813	15.0936	11.3141	14.3969	20.9991	24.5717	135.136	166.3	188.647	222.597	1.38445	1.04341	1.0359	1.87011	0.642763	0.529711	1.81395	1.52268	1.32188	1.20808	0.600359	0.0109292	1.32058e-05	0.24302
Mtx2	7	41.673	43.4743	34.734	84.7603	15.0263	36.034	24.9743	34.6745	13.9575	27.9195	39.9932	35.7249	28.8498	28.9117	25.2619	26.009	18.1694	21.5908	19.6439	18.9986	1.042	1.21692	1.20396	2.9317	0.59482	1.38544	1.37452	1.60598	0.710527	1.46956	0.107137	0.0390558	0.037447	0.221768
Mycbp	7	61.0212	40.8947	61.9172	57.6632	7.13054	27.5047	34.8217	34.5541	29.8051	24.2737	22.5946	23.7758	13.3699	17.0842	13.4545	19.8919	11.6083	14.1152	14.3633	11.2665	2.7007	1.72001	4.63109	3.37525	0.529976	1.38271	2.99974	2.44801	2.07509	2.1545	0.110763	0.00026022	5.85172e-05	0.219425
Nemf	7	9.29773	12.7562	12.848	20.7167	6.45021	7.94058	13.3134	13.1426	10.3256	8.48313	9.62923	12.8254	9.00637	9.51658	7.64643	9.72916	7.03042	8.74434	6.25171	7.0822	0.965574	0.994607	1.42654	2.1769	0.843559	0.816163	1.89369	1.50299	1.65165	1.19781	0.0630174	0.0359129	0.00362057	0.414351
Npm3	7	26.7554	17.3125	26.0171	25.845	5.00235	6.89129	15.9557	22.1247	31.3641	5.22819	39.3129	23.9226	28.5063	19.3991	32.2048	24.4571	20.1378	20.5562	13.7125	9.66839	0.680577	0.723685	0.91268	1.33228	0.155329	0.281771	0.792328	1.07631	2.28726	0.540751	0.148288	1.31412e-05	3.82832e-06	0.342001
Nqo2	7	67.5052	69.2643	29.111	50.1818	6.94164	20.8645	27.4859	25.4839	7.91331	27.701	19.7583	24.9066	20.0688	15.3377	13.7046	13.0672	13.1767	14.1093	11.5454	13.7673	3.41655	2.78096	1.45056	3.2718	0.506518	1.5967	2.08594	1.80617	0.685407	2.0121	0.41252	0.0178066	0.00257044	0.107781
Nutf2	7	75.8583	37.5246	29.6447	127.094	18.3994	14.2578	24.2846	42.4583	14.4203	28.8452	41.4276	17.2157	33.4001	16.1604	31.1147	18.5206	20.3489	15.0405	15.6199	8.25147	1.8311	2.17967	0.887565	7.86451	0.591342	0.769838	1.19341	2.82293	0.923201	3.49576	0.443679	0.000570246	0.000307171	0.938148
Pitpnb	7	77.8211	74.6183	87.3286	107.691	56.2266	29.5565	53.2171	59.7522	64.9405	37.1148	16.8844	20.3053	15.0958	16.362	16.7251	15.1067	11.7168	15.7565	9.02356	11.5286	4.60905	3.67482	5.78495	6.58173	3.3618	1.95652	4.54196	3.79222	7.19677	3.21935	0.252965	0.0443636	0.0420792	0.869428
Ppme1	7	29.0526	19.1112	28.7937	37.797	7.57931	6.78687	28.7603	31.0446	28.5128	23.425	9.0777	12.6361	10.4495	8.3376	7.08316	9.53652	11.4335	13.329	13.7966	12.9644	3.20044	1.51243	2.7555	4.53331	1.07005	0.711672	2.51543	2.3291	2.06666	1.80687	0.163648	0.000343341	9.30996e-05	0.28723
Rexo2	7	83.4418	69.4185	64.3359	56.4401	24.0169	27.9959	49.9867	41.2106	43.7593	43.0307	45.0668	40.5784	39.8475	34.3326	34.3112	31.525	22.1755	27.7549	21.509	22.4509	1.85151	1.71072	1.61455	1.64392	0.699975	0.888052	2.25414	1.48481	2.03446	1.91666	0.862855	0.0426412	0.000559226	0.892031
Sart1	7	5.47952	14.8379	14.4723	12.6708	7.23164	6.22649	15.1522	16.479	16.6252	12.9568	12.685	12.6306	11.0337	10.6207	10.1052	11.7248	13.0845	16.2325	13.0969	14.3222	0.431967	1.17476	1.31165	1.19303	0.715636	0.531053	1.15803	1.01519	1.2694	0.904667	0.0638196	0.0454617	0.0259455	0.921844
Tmub2	7	35.1334	39.3326	27.7272	32.9541	12.7725	12.0656	19.7478	20.6316	16.7792	25.8266	16.0375	14.4858	9.66001	12.3164	10.3287	9.60312	8.97596	8.83641	14.4321	13.3042	2.1907	2.71525	2.87031	2.67562	1.23661	1.25642	2.20008	2.33484	1.16263	1.94123	0.646887	0.0415726	0.0164677	0.102851
Utp6	7	25.2992	33.6275	24.2323	37.9215	19.0834	10.4484	20.0207	33.8744	11.2492	12.9314	22.8423	27.3871	20.3735	16.9655	17.856	19.4905	16.2566	18.9401	12.7502	13.2995	1.10756	1.22786	1.1894	2.23521	1.06874	0.536076	1.23155	1.7885	0.882279	0.972321	0.266744	0.0300716	0.00653618	0.0751587
3830406C13Rik	7	56.4503	26.4921	28.0888	26.2616	15.8314	8.38827	24.1098	40.7476	15.2709	22.91	25.7256	25.8276	20.8192	20.1998	17.1254	17.6868	12.0676	14.7439	12.3778	15.6229	2.19432	1.02573	1.34918	1.30009	0.924439	0.474267	1.9979	2.76369	1.23373	1.46644	0.785942	0.105883	1.58496e-05	0.0411931
Farsb	7	62.7181	41.6441	29.5787	30.3847	27.7463	22.1834	38.4195	38.8736	12.4262	18.8642	37.7547	32.7326	28.3259	26.4245	25.6213	26.6822	20.1214	21.6959	14.0779	15.9086	1.6612	1.27225	1.04423	1.14987	1.08294	0.831393	1.90939	1.79175	0.88267	1.18578	0.42166	0.716486	0.00545304	0.0172837
Itch	7	24.0696	15.3521	13.509	30.9333	7.08779	15.3438	20.1575	16.5504	5.64313	18.8974	20.5621	26.1061	21.2499	19.1861	16.9425	16.7199	15.8716	17.3145	15.9831	17.8944	1.17058	0.588064	0.635719	1.61228	0.418343	0.917697	1.27003	0.95587	0.353068	1.05605	0.479984	0.137196	0.0108078	0.0405056
Luc7l3	7	31.721	21.9916	18.9097	10.7911	8.30303	19.6086	43.4438	39.0042	16.1135	18.3298	9.50823	14.8651	7.08643	9.46164	8.23457	12.5365	13.9578	20.1259	10.1107	13.6049	3.33616	1.47941	2.66844	1.14052	1.00831	1.56411	3.11251	1.93801	1.59371	1.3473	0.506778	0.435132	0.00568914	0.0279879
Nit2	7	26.4574	28.2998	44.5834	5.0003	7.94994	11.6821	19.9363	16.5107	11.0767	9.02104	11.7958	12.9835	9.93753	9.03529	8.39654	8.7644	7.03381	8.99269	7.68861	7.41381	2.24296	2.17967	4.48637	0.553419	0.946811	1.3329	2.83435	1.83601	1.44066	1.21679	0.333928	0.477263	0.00627869	0.0294815
Phf6	7	19.209	26.8882	22.2755	11.0641	15.9049	19.0836	63.9922	55.6448	25.7347	19.3041	12.5801	15.5363	11.3176	10.5195	13.608	13.1323	19.4739	26.9775	13.1318	16.8825	1.52694	1.73068	1.96821	1.05176	1.16879	1.45318	3.28605	2.06264	1.95972	1.14344	0.766685	0.850381	0.00462897	0.0153535
Fbxo6	7	11.4184	29.716	26.0686	32.536	6.89717	12.8951	25.034	35.8106	28.8296	29.1285	18.2126	16.2034	14.49	13.0521	12.1021	13.2476	17.3917	20.027	23.8989	21.0672	0.626949	1.83393	1.79907	2.49279	0.569916	0.973389	1.43942	1.78811	1.20632	1.38265	0.0369623	0.00523189	0.00319285	0.40532
Fam45a	7	60.5576	75.1123	68.7087	61.5951	13.5866	12.7616	30.159	34.2025	10.3256	24.3429	43.448	43.4257	33.1495	29.9488	20.8872	22.2902	14.753	17.0824	14.0949	14.3235	1.39379	1.72967	2.07269	2.05668	0.650476	0.572522	2.04427	2.00221	0.732581	1.6995	0.357915	0.000848362	3.5678e-06	0.0356029
Mpc1	7	31.1088	26.5442	34.6008	155.578	8.05331	20.3396	54.0318	55.7511	50.4933	12.0241	49.3663	33.4898	51.0739	39.5796	45.3957	37.8296	41.6828	40.0918	40.6792	35.6054	0.630164	0.792608	0.677465	3.93075	0.177402	0.537664	1.29626	1.39059	1.24126	0.337705	0.0128516	6.37546e-06	3.48765e-07	0.00546689
1700037H04Rik	8	41.1448	70.0899	32.43	26.661	23.078	31.7925	15.2298	14.2646	13.7806	36.1799	25.6505	17.2933	15.7572	14.146	17.3125	15.6447	11.2302	9.54173	8.60586	6.75041	1.60405	4.05301	2.05811	1.8847	1.33302	2.03216	1.35615	1.49497	1.6013	5.35965	0.583101	0.678184	0.718892	0.0154593
5031439G07Rik	8	45.296	47.668	44.1934	15.8043	30.6179	40.3847	13.1121	16.9117	24.5069	14.5898	101.369	85.4086	74.3062	75.9017	56.8794	63.2315	31.7294	36.2689	30.3077	29.0615	0.446844	0.558117	0.594746	0.208221	0.538296	0.63868	0.413249	0.466288	0.808603	0.502031	0.476832	0.156539	0.107377	0.00803487
Acads	8	43.5012	26.2249	29.7465	33.3625	7.07238	31.6647	9.33451	14.6881	14.781	20.2743	16.5409	15.4806	12.9358	12.1383	8.81254	12.0005	9.0419	10.4688	9.1489	8.32972	2.62992	1.69405	2.29955	2.74852	0.802535	2.63861	1.03236	1.40304	1.6156	2.43397	0.564575	0.144546	0.602171	0.0440604
Acadsb	8	12.0301	19.683	14.6481	30.9213	15.5196	12.0843	12.9136	12.4566	25.3842	28.7129	8.97251	11.6705	10.1092	9.24927	8.94843	9.84852	9.13421	9.7794	10.8799	11.5419	1.34077	1.68657	1.44899	3.3431	1.73434	1.22702	1.41376	1.27376	2.33313	2.48771	0.238322	0.303963	0.849067	0.0292138
Acbd5	8	25.8194	32.6011	34.2811	36.1307	17.2552	16.9792	14.0306	17.7758	20.6072	19.8744	24.0605	29.0052	22.3735	23.8156	17.9357	21.2236	14.4761	17.046	11.6448	12.7297	1.07311	1.12398	1.53222	1.5171	0.96206	0.800017	0.969224	1.04282	1.76966	1.56126	0.286515	0.124391	0.616507	0.0280141
Akr1a1	8	359.69	393.667	329.083	254.998	197.714	187.141	308.293	340.371	470.372	420.109	623.048	550.063	499.845	467.158	485.462	447.802	504.679	587.843	558.798	556.99	0.577308	0.715677	0.65837	0.54585	0.40727	0.41791	0.610869	0.579018	0.841756	0.754249	0.790107	0.238362	0.132695	0.047281
Apex1	8	43.2582	61.5647	52.1752	53.681	40.7442	57.391	20.5438	27.9949	17.2221	20.5058	54.0533	52.8035	44.5181	40.3409	35.0415	34.8902	19.4016	23.7886	9.34854	10.2861	0.800288	1.16592	1.172	1.33068	1.16274	1.6449	1.05887	1.17682	1.84222	1.99355	0.358444	0.74247	0.447664	0.0302955
Atp13a3	8	24.1347	20.4248	20.1085	21.8629	17.2714	23.311	6.31506	10.3678	7.31689	5.43627	36.054	36.3706	42.8187	37.652	45.4312	39.0663	21.3729	20.3165	9.6185	9.60853	0.669405	0.561575	0.46962	0.580656	0.380168	0.596705	0.29547	0.510313	0.760709	0.565775	0.57848	0.770437	0.417462	0.00438726
B3gat3	8	27.8257	18.4337	18.2346	14.608	6.93659	8.36143	5.14985	7.00296	10.8729	11.263	37.2057	26.0596	27.973	26.0179	22.6888	23.3781	15.228	16.0913	18.4673	17.188	0.747887	0.707365	0.651866	0.561461	0.305728	0.357661	0.338183	0.435202	0.588766	0.655284	0.587767	0.0744219	0.901421	0.0062221
BC003965	8	32.3643	50.6825	17.3856	37.4196	21.3565	8.82628	11.9797	7.39229	26.7805	8.6094	23.1617	19.2559	13.5442	15.8671	14.6362	15.5086	8.69189	10.6634	6.70941	7.73948	1.39732	2.63206	1.28362	2.35831	1.45915	0.569121	1.37826	0.693242	3.99149	1.1124	0.882408	0.124695	0.801155	0.0265025
Bmpr2	8	16.2015	14.5155	17.6407	6.78347	8.52813	12.904	10.241	8.87186	19.8688	25.0487	13.712	14.524	14.7517	15.7013	12.7169	11.8411	12.5426	13.368	17.8529	19.7288	1.18156	0.999413	1.19584	0.432031	0.670612	1.08977	0.816497	0.663663	1.11292	1.26965	0.159385	0.499264	0.474309	0.0134589
Cacul1	8	70.9557	51.9624	59.765	49.9954	44.822	44.7135	10.1997	23.1827	29.0719	23.8843	68.1423	60.3	65.9153	69.611	53.8558	49.5066	23.0078	27.4539	27.5987	28.8738	1.04129	0.861731	0.906693	0.718211	0.832259	0.903184	0.443317	0.844422	1.05338	0.827198	0.624717	0.755303	0.102361	0.0158618
Cant1	8	29.9542	26.3859	22.7955	44.4013	13.1774	17.6995	21.7403	8.3622	35.8023	35.7097	24.3573	21.9318	21.2561	19.0494	16.537	17.8119	17.6049	17.4678	23.0431	20.6776	1.22978	1.20309	1.07242	2.33085	0.796843	0.993691	1.2349	0.478722	1.55371	1.72698	0.387295	0.116824	0.538257	0.000745398
Clcn4	8	20.1032	23.6452	25.586	19.9141	24.3014	20.6224	14.8825	12.5614	23.5661	13.5846	22.4045	25.0917	25.2666	23.8047	21.3523	22.9238	14.8959	14.3801	13.3111	11.4135	0.897287	0.942354	1.01264	0.836561	1.13812	0.899604	0.999102	0.873524	1.7704	1.19022	0.969987	0.705015	0.72775	0.0406325
Cox15	8	25.1361	23.6999	15.7813	26.6032	18.6808	20.8793	33.495	23.5872	53.0385	35.3647	15.0245	16.5496	11.3387	11.0433	10.7916	9.98479	25.3847	24.0778	25.2731	22.3788	1.673	1.43205	1.39181	2.409	1.73105	2.09111	1.31949	0.979627	2.09862	1.58028	0.564453	0.892415	0.0715839	0.0477838
Creld2	8	30.4715	58.5326	43.5504	31.4634	22.9274	26.4166	18.7067	13.4672	38.3339	30.2488	33.5732	34.0874	29.809	29.1947	24.9327	25.596	19.8796	18.9721	20.8384	21.5122	0.907613	1.71713	1.46098	1.07771	0.919571	1.03206	0.941	0.709844	1.83958	1.40613	0.908976	0.510016	0.448464	0.00284139
Dcaf12	8	16.0312	9.20889	18.3	22.5072	8.67073	17.6961	11.656	12.2274	21.4773	17.549	31.194	33.0343	37.3681	32.4044	36.4713	32.8332	23.6397	26.6485	22.8189	24.812	0.51392	0.278767	0.489721	0.694571	0.237742	0.53897	0.49307	0.458839	0.941209	0.70728	0.139572	0.102906	0.52829	0.00211794
Ddx27	8	18.1344	11.9555	10.4155	11.1225	16.8885	14.5412	12.5384	13.5073	11.2307	11.0032	13.7914	15.062	12.5946	12.4459	12.845	15.5095	12.8029	16.7225	6.41939	6.941	1.31491	0.793753	0.826981	0.893671	1.31479	0.937564	0.97934	0.807728	1.74949	1.58525	0.629011	0.420922	0.333553	0.00533031
Dpp8	8	24.1542	23.2422	18.3817	14.3	16.3229	18.439	11.3105	12.2416	13.6457	13.0142	37.3756	41.0976	38.9174	34.6146	32.688	32.5556	23.3237	25.8495	19.7732	20.2423	0.646255	0.565536	0.472326	0.413121	0.499355	0.566385	0.484938	0.473574	0.690112	0.642923	0.265354	0.456122	0.471044	0.018995
Eed	8	52.4723	39.5663	30.9586	35.6565	13.2277	21.4115	7.20167	6.86789	11.0581	15.9973	27.8807	29.1039	26.3827	25.0644	20.8384	20.305	7.57791	7.94891	9.59463	9.22775	1.88203	1.35949	1.17345	1.4226	0.634774	1.0545	0.95035	0.864004	1.15253	1.73361	0.5774	0.190527	0.602866	0.045216
Esrra	8	15.9495	5.44368	8.40305	5.10121	18.2361	8.05807	17.0299	13.1008	31.6407	24.659	20.0533	16.7799	15.5595	14.4266	19.5382	16.6739	20.3052	24.9336	28.8362	27.5319	0.795353	0.324416	0.540059	0.353597	0.933356	0.483274	0.838697	0.525427	1.09726	0.895653	0.669242	0.204792	0.740825	0.032594
Fdps	8	29.4451	32.6621	29.6908	11.1299	23.5348	28.4402	18.801	17.6265	22.4361	17.7545	46.2589	40.3655	33.0924	30.0105	30.9426	26.7772	29.4076	26.6729	21.899	17.1775	0.636529	0.809159	0.897208	0.370867	0.760597	1.06211	0.639327	0.66084	1.02453	1.03359	0.483657	0.152819	0.133661	0.0115353
Fis1	8	143.326	129.175	175.295	156.722	124.893	130.524	102.315	61.2842	126.01	150.465	142.693	147.833	127.459	109.302	111.67	103.834	97.9264	113.162	102.403	103.839	1.00444	0.873789	1.3753	1.43384	1.11841	1.25704	1.04481	0.541563	1.23054	1.44902	0.186804	0.672637	0.0552176	0.00566467
Gde1	8	31.3246	33.8782	19.6667	18.9445	25.4763	29.6505	11.8847	12.1632	12.8521	20.4617	43.8265	43.0914	40.5339	36.0244	31.6666	33.792	17.294	16.9631	15.5041	15.2177	0.714742	0.786194	0.485192	0.525881	0.804517	0.877439	0.687216	0.717038	0.828948	1.3446	0.206607	0.093142	0.426094	0.0270881
Hax1	8	37.8288	30.0536	30.3443	37.0997	22.9384	22.9102	19.679	23.8196	45.5434	33.3924	34.2875	22.3732	32.6792	17.3067	31.3387	21.6876	31.6603	26.3526	42.0727	29.3856	1.10328	1.34329	0.928553	2.14367	0.731954	1.05637	0.621568	0.903881	1.08249	1.13635	0.609107	0.19147	0.420091	0.0355189
Itpripl2	8	13.9745	18.4411	20.1694	17.1216	19.7308	32.3942	20.8691	24.3245	36.1526	32.9299	33.7483	25.0443	33.3388	33.9979	37.576	42.2866	42.3274	49.1089	48.5505	45.6054	0.414081	0.736339	0.604984	0.503608	0.52509	0.766064	0.49304	0.495317	0.74464	0.722063	0.983441	0.637635	0.13871	0.0101225
Lacc1	8	12.6316	10.3419	13.2749	19.5531	25.6411	41.3656	80.8213	68.1222	117.049	147.796	15.0178	14.7316	20.8386	20.6748	50.0271	51.1347	107.222	119.291	136.076	148.871	0.841109	0.702024	0.637034	0.945745	0.512543	0.808954	0.753772	0.57106	0.860174	0.99278	0.970384	0.538832	0.868673	0.0353311
Lfng	8	284.874	214.726	142.091	156.199	39.6574	49.8588	11.1799	5.77509	35.4061	23.1096	127.449	108.425	78.9165	79.6086	29.4709	35.8769	7.97132	8.60843	17.8594	16.2972	2.2352	1.9804	1.80052	1.96209	1.34565	1.38972	1.40251	0.670865	1.98249	1.41802	0.818478	0.404482	0.249034	0.0302267
Mbd3	8	30.7942	23.3417	37.4957	5.43193	14.9694	18.2425	9.87872	14.6144	26.4723	10.3155	28.9944	19.3281	18.0981	17.4419	18.4477	15.8131	10.137	12.4147	8.1927	8.17897	1.06207	1.20766	2.0718	0.311429	0.811452	1.15364	0.974518	1.17719	3.2312	1.26123	0.294686	0.529336	0.6673	0.0241612
Mbnl1	8	346.849	299.751	263.957	179.704	174.421	178.48	131.154	150.45	243.606	253.912	331.986	351.126	343.444	297.891	276.747	258.651	174.39	210.942	233.73	231.017	1.04477	0.853685	0.768558	0.603254	0.630254	0.690042	0.752069	0.713233	1.04225	1.0991	0.265656	0.998788	0.730125	0.0282086
Mmd	8	59.036	50.9334	70.7187	30.5797	68.6791	110.663	32.7784	26.178	15.3789	21.4241	60.1426	51.0468	89.5019	76.2142	102.606	89.7648	36.5673	40.4802	13.9952	12.3556	0.981602	0.997779	0.790136	0.401234	0.669348	1.23282	0.896385	0.646686	1.09887	1.73396	0.0640739	0.122562	0.488331	0.00405228
Mpp6	8	25.9891	28.0277	21.6093	18.1918	22.6756	23.4287	11.9358	8.40953	15.7971	5.80393	57.5349	53.4553	54.1887	45.8649	45.6982	43.5925	26.153	30.6787	19.1067	18.5873	0.45171	0.52432	0.39878	0.396639	0.496205	0.537447	0.456384	0.274116	0.826783	0.312253	0.48528	0.336926	0.0538523	0.0182055
Mpv17	8	56.3753	59.2431	55.3214	19.0661	43.2705	19.4878	12.0811	26.8828	38.2603	18.6363	31.7038	29.6336	25.8512	25.9756	22.3668	22.376	11.927	12.5012	10.2262	9.28796	1.77819	1.99919	2.14	0.734002	1.93459	0.870927	1.01292	2.15041	3.74139	2.0065	0.242752	0.795403	0.647495	0.0418539
Mrpl11	8	59.5607	30.7816	32.9647	66.5164	23.537	28.241	23.0486	15.7685	50.7783	25.1665	35.8016	34.9608	27.0768	29.1234	25.544	31.1162	21.9667	26.1009	21.5379	19.4257	1.66363	0.880458	1.21745	2.28395	0.921429	0.907598	1.04925	0.604136	2.35762	1.29553	0.30542	0.104716	0.577808	0.00131044
Mrpl37	8	11.0244	21.7402	22.3726	10.1863	26.4519	8.0453	8.61482	11.0982	27.2828	8.92473	12.9589	10.052	9.78822	10.1697	10.9461	11.6088	9.48304	9.01652	8.88792	8.68968	0.850721	2.16277	2.28567	1.00163	2.41657	0.693036	0.908445	1.23087	3.06964	1.02705	0.695857	0.767102	0.420456	0.0464015
Nt5dc2	8	27.3428	35.5084	23.3458	48.9035	19.4512	11.8521	7.8993	7.7686	7.81773	6.36688	51.2919	45.4782	42.0823	45.0694	32.0943	29.2075	14.2311	19.272	9.91973	8.35035	0.533082	0.780778	0.554766	1.08507	0.606064	0.405791	0.555074	0.403103	0.788099	0.762468	0.475473	0.194179	0.737118	0.0034953
Numb	8	55.1247	33.6529	40.1398	16.4893	18.9074	21.4506	7.19294	11.036	13.017	21.5213	22.2363	22.3771	18.3597	17.4489	12.5124	11.899	5.56964	8.4331	5.54949	6.56176	2.47904	1.5039	2.1863	0.945003	1.5111	1.80273	1.29145	1.30865	2.34561	3.27981	0.377844	0.611785	0.447249	0.00526176
Orai2	8	12.4	22.3515	40.1055	49.9954	45.788	65.4734	22.9494	21.3994	55.7212	51.9224	16.0699	12.6209	41.5522	42.1939	64.9984	66.1754	33.3835	33.3443	45.0397	42.3444	0.771629	1.77098	0.965182	1.1849	0.704447	0.989391	0.687448	0.641773	1.23716	1.22619	0.827548	0.472324	0.315225	0.00222101
Pafah1b3	8	64.8773	49.6312	22.9837	35.5159	15.6851	19.8794	13.2493	18.0974	20.98	23.6063	25.0874	26.5413	20.0679	21.5363	17.4225	19.8483	14.0441	17.1326	12.638	10.9137	2.58605	1.86996	1.1453	1.64911	0.90028	1.00157	0.943407	1.05632	1.66007	2.163	0.210088	0.329274	0.859648	0.0101403
Pak1	8	45.8602	34.4435	35.6273	25.2796	23.3113	16.2415	14.6765	11.4387	15.6799	13.4421	40.9359	45.3705	40.5864	36.7284	31.1457	29.0131	14.6508	18.0671	9.90337	10.6036	1.12029	0.759162	0.877814	0.688285	0.748459	0.559799	1.00175	0.633125	1.58329	1.26769	0.592368	0.638658	0.412971	0.00832303
Parp2	8	21.8711	12.6465	12.3946	10.2019	13.8335	8.98924	8.78461	5.11956	7.63699	9.35291	14.769	15.0379	12.5708	11.2444	8.17724	9.30808	7.66692	7.70404	5.81231	6.62119	1.48089	0.840976	0.985985	0.907285	1.69171	0.965746	1.14578	0.66453	1.31393	1.41257	0.65826	0.348809	0.149491	0.0493868
Pigm	8	17.068	14.8757	13.4528	24.4235	13.6762	13.6594	9.47659	10.2567	12.8623	20.2153	12.6396	13.8821	14.2672	12.7603	16.8587	18.142	9.98268	10.0012	10.6466	10.0611	1.35035	1.07157	0.942922	1.91403	0.811227	0.752915	0.949303	1.02555	1.20811	2.00926	0.681327	0.133774	0.359214	0.0416552
Pkn2	8	7.65805	7.32302	5.42595	17.9668	10.5163	5.30522	9.28588	9.05747	8.66761	13.2689	12.2642	14.5979	12.1435	12.1135	14.8176	15.6972	17.2328	18.8487	14.6715	15.0616	0.624422	0.50165	0.44682	1.48321	0.709715	0.337972	0.538849	0.480536	0.59078	0.88097	0.196826	0.128977	0.742956	0.0127293
Polr1d	8	68.1429	71.2683	63.7108	126.578	64.4299	28.5835	17.2959	23.9396	22.823	25.4354	114.52	95.7373	99.3679	101.26	92.1407	91.3925	48.0196	55.7801	43.5908	42.2657	0.595029	0.744416	0.641161	1.25003	0.699255	0.312756	0.360184	0.429178	0.523575	0.601798	0.297333	0.0540045	0.262397	0.0147694
Ppm1a	8	25.0645	11.6471	24.7452	20.9966	37.9962	8.37504	12.5374	10.9599	14.2939	13.275	32.8946	34.0434	32.5486	33.0442	28.8129	35.132	22.0532	27.937	19.8014	18.4513	0.761963	0.342126	0.760254	0.63541	1.31872	0.238388	0.568507	0.392309	0.721865	0.719463	0.302261	0.612224	0.194494	0.0100498
Rpl15	8	93.9198	89.3983	130.392	69.0822	123.868	117.684	93.4884	129.776	133.903	108.415	237.927	114.163	193.676	100.533	178.802	93.973	160.989	114.372	144.779	81.4193	0.394742	0.783079	0.673249	0.687163	0.692762	1.25231	0.580713	1.13469	0.924879	1.33156	0.406197	0.323342	0.483582	0.0499318
Scyl1	8	25.4318	19.9972	15.6792	36.7482	19.6816	8.70619	9.89027	8.54172	13.5855	17.6316	23.1247	23.5094	19.484	22.0677	16.3281	17.4743	12.4131	15.2867	14.7156	14.3043	1.09977	0.850603	0.804721	1.66525	1.20538	0.498227	0.796758	0.558767	0.923201	1.23261	0.52525	0.260642	0.401756	0.0117717
Slc10a3	8	30.5249	17.5346	25.304	9.88977	14.3697	18.5323	14.5271	6.70241	17.8915	21.9114	19.9525	18.2043	16.5235	14.58	16.055	16.135	9.7923	9.78079	9.20964	8.37632	1.52988	0.963207	1.53139	0.67831	0.895031	1.14858	1.48352	0.685263	1.94269	2.61588	0.588509	0.933175	0.93848	0.00180785
Slc35b3	8	19.7105	7.80855	10.1786	16.4972	9.08137	12.5106	11.7255	6.37793	14.8537	27.2361	6.777	8.59787	7.62111	7.09506	6.81763	7.94884	6.35802	6.28075	7.6251	8.04158	2.90845	0.908196	1.33557	2.32517	1.33204	1.57389	1.84421	1.01547	1.948	3.38691	0.727346	0.642437	0.984562	0.0279656
Slc38a10	8	37.0667	44.938	37.2493	44.3674	29.5866	32.4969	15.3034	18.7599	21.7257	20.6547	48.8915	47.4308	43.9511	45.8241	40.4724	41.8357	26.578	28.337	25.2078	23.5595	0.758141	0.947442	0.847517	0.968211	0.731031	0.776773	0.575791	0.662028	0.861865	0.876705	0.763124	0.60956	0.257278	0.0290182
Slc39a9	8	32.8729	26.1795	26.2996	16.5674	12.765	9.76955	7.79997	8.18231	17.7855	8.04713	13.9108	13.0832	11.9065	12.471	11.7821	10.8095	9.70446	9.69305	8.25646	9.04632	2.36311	2.00101	2.20885	1.32848	1.08342	0.903792	0.803751	0.844142	2.15414	0.889546	0.535209	0.170955	0.448023	0.0405985
Srd5a3	8	51.8432	52.2792	45.4311	44.5366	37.0092	46.1287	24.7142	18.3004	46.0404	48.9422	36.8135	34.1785	29.8856	25.7812	28.3908	28.7633	22.5312	22.2711	26.8689	27.1752	1.40827	1.52959	1.52017	1.72749	1.30357	1.60373	1.09688	0.82171	1.71352	1.80099	0.696904	0.787209	0.107713	0.00712236
St6galnac4	8	6.00504	9.51586	11.0984	9.72787	18.7657	24.5262	10.4788	12.769	30.169	12.5006	11.526	11.6238	19.1056	16.6276	21.7557	24.2862	17.2844	17.3066	18.14	17.4026	0.521002	0.818656	0.580896	0.585043	0.862567	1.00988	0.606258	0.737812	1.66312	0.718317	0.659574	0.172446	0.150334	0.0215789
Strn4	8	18.7854	22.9215	13.5162	18.8491	10.7283	19.266	9.98768	12.1572	11.2108	17.3338	28.6541	23.5959	23.9473	21.979	23.8373	25.0138	17.7296	21.6873	16.6043	15.3015	0.655593	0.971419	0.564414	0.857592	0.450063	0.770214	0.563333	0.560565	0.675177	1.13281	0.706066	0.617165	0.707433	0.00604258
Surf1	8	44.2689	34.3737	17.5184	25.4343	18.871	20.5239	10.4872	9.16768	20.7577	29.8069	17.6093	23.0357	15.2452	16.3601	13.3483	11.4257	9.09512	10.7521	13.1695	12.3098	2.51395	1.4922	1.14911	1.55466	1.41374	1.79629	1.15305	0.852641	1.5762	2.42141	0.32614	0.610346	0.0986405	0.00722502
Tab2	8	17.8972	21.3001	18.7275	42.5627	26.1419	48.1138	27.6028	40.7794	23.6025	26.0419	30.2548	26.5888	34.0232	34.9544	68.5731	60.7778	64.5031	80.5433	37.8755	42.8968	0.591549	0.801092	0.550433	1.21766	0.381226	0.791635	0.427929	0.506304	0.623161	0.607082	0.537247	0.175934	0.265472	0.025513
Thap4	8	23.6613	42.869	33.6122	13.1174	14.1563	46.317	9.92602	10.2084	18.4913	21.4005	28.2026	21.9756	17.0775	17.4275	21.5769	21.247	11.2725	13.0576	9.40163	11.094	0.838976	1.95076	1.96821	0.752686	0.656087	2.17993	0.880554	0.7818	1.96682	1.92902	0.952642	0.966053	0.253657	0.00181242
Tmem189	8	94.821	106.774	113.707	34.0311	41.9032	58.4664	17.7263	16.1159	80.8394	69.302	87.3438	58.6129	84.6328	69.2453	53.8392	45.6554	19.06	18.373	53.6107	43.4149	1.08561	1.82168	1.34353	0.491457	0.778302	1.2806	0.930026	0.877151	1.5079	1.59627	0.0824685	0.455383	0.753259	0.01504
Tmem261	8	172.801	176.138	63.9749	81.2047	61.5596	54.131	24.2021	43.8252	60.2225	48.1075	57.0666	44.8612	32.7448	38.3212	27.7449	33.1484	21.4386	26.7378	19.9691	20.3153	3.02806	3.9263	1.95374	2.11905	2.21877	1.63299	1.1289	1.63907	3.01579	2.36804	0.195442	0.901998	0.26491	0.0196262
Ttyh3	8	34.7386	58.704	35.1111	24.2099	16.4403	29.7784	9.443	9.13308	13.9983	18.2735	36.5212	28.9352	23.6175	27.1785	22.4364	21.9772	8.56583	9.90101	9.3115	9.4002	0.951191	2.02881	1.48665	0.890774	0.732749	1.35497	1.1024	0.922439	1.50334	1.94395	0.639372	0.716493	0.87426	0.0259548
Uhmk1	8	11.1392	14.0723	15.5413	15.4384	9.02478	20.0835	9.62075	9.21126	8.70528	12.1271	39.4123	39.2486	40.8365	31.3864	35.775	33.4418	24.3536	25.7974	22.7077	23.2459	0.282632	0.358542	0.380573	0.491883	0.252265	0.60055	0.395044	0.357062	0.383363	0.521689	0.248721	0.776194	0.44236	0.043832
Yrdc	8	36.1012	7.70101	31.7001	42.6869	36.8636	38.6242	13.3629	18.5707	17.3619	14.4189	13.7101	12.4248	21.5702	21.3509	22.6435	23.4434	15.2971	15.5086	8.15575	7.78971	2.63319	0.619812	1.46963	1.99931	1.628	1.64755	0.873554	1.19745	2.12879	1.85102	0.344703	0.938777	0.0776838	0.00989548
Zc3h14	8	19.3556	25.2872	19.9672	31.2158	19.3005	16.9502	6.20924	6.40226	6.05058	10.3741	38.997	37.2393	34.7696	34.9318	31.436	30.7025	13.2555	17.8664	12.5505	13.8489	0.496337	0.679045	0.574272	0.893621	0.613961	0.552079	0.468428	0.358341	0.482098	0.749092	0.416382	0.554008	0.0717761	0.00504246
Adap1	8	24.3499	21.2223	17.4717	6.31129	11.7067	8.60119	10.5582	17.5592	17.9421	22.7225	27.9684	27.4833	25.8238	26.5648	22.8531	23.2308	30.9002	40.5886	30.9728	29.5273	0.870621	0.772186	0.676574	0.237581	0.512256	0.370249	0.341689	0.432614	0.579285	0.769541	0.0230771	0.786306	0.168403	0.000640768
Adipor1	8	89.1848	77.839	44.7211	48.0836	34.9001	45.9419	18.4252	20.5812	21.0715	23.6224	175.244	160.657	176.356	151.334	125.768	121.003	58.0512	64.5968	49.6977	46.7399	0.508918	0.484504	0.253585	0.317733	0.277496	0.379676	0.317396	0.318609	0.423994	0.5054	0.0358654	0.521768	0.525233	0.0303509
Ncaph2	8	30.0419	39.7508	42.1319	73.324	34.6637	23.2133	17.9509	21.3861	21.13	14.8796	60.9762	57.1137	56.3751	45.4464	46.5779	47.9764	32.3943	39.2061	22.8433	20.3782	0.492682	0.695994	0.74735	1.61342	0.744209	0.483848	0.554139	0.545478	0.924999	0.730172	0.0284899	0.0692062	0.497787	0.0104188
Syngr1	8	152.815	194.077	135.677	55.251	86.3347	152.306	62.3032	72.3802	67.5013	112.396	155.927	138.984	151.626	139.441	116.644	119.95	74.0776	77.3936	63.1878	53.706	0.980045	1.3964	0.894811	0.396232	0.740158	1.26975	0.841053	0.935221	1.06826	2.09281	0.0245583	0.0964416	0.725022	0.0115654
Tmco3	8	16.055	7.63246	12.2181	25.4304	7.07552	19.79	19.9508	19.5434	49.2919	25.3542	15.2865	16.876	13.6372	14.5468	16.7551	16.7416	34.7154	35.982	46.7356	44.3828	1.05027	0.452266	0.895936	1.74817	0.422291	1.18209	0.574695	0.543143	1.0547	0.571261	0.0488632	0.0797823	0.216266	0.0410232
Galnt1	8	33.4041	28.8195	33.5416	38.5806	15.0931	19	13.5667	13.5111	9.78952	19.1159	39.462	46.8375	42.3828	38.1881	35.6681	35.4367	21.9878	21.18	15.0522	15.73	0.846489	0.615307	0.791395	1.01028	0.423155	0.536167	0.617012	0.637918	0.65037	1.21525	0.449752	0.0441077	0.277118	0.0209551
Trappc6b	8	28.0767	9.16003	25.1373	38.705	25.0117	5.10466	7.33597	8.55063	11.6163	15.7676	32.3239	26.5807	33.036	29.3441	30.1765	26.7749	19.9985	21.2029	22.6831	20.0753	0.868604	0.344612	0.760907	1.319	0.828848	0.190651	0.366827	0.403276	0.512115	0.785419	0.0640297	0.0275127	0.396611	0.00559068
2310011J03Rik	8	71.3478	80.4617	34.3879	48.5436	18.6754	95.5592	25.5292	18.4694	44.6067	64.5308	31.7019	28.2911	26.2381	27.3508	23.2705	27.2385	20.8902	30.1785	29.8286	28.9085	2.25059	2.84406	1.31061	1.77485	0.802535	3.50824	1.22207	0.612003	1.49543	2.23224	0.201476	0.83766	0.0307854	0.00289008
Abca3	8	19.3158	16.6178	18.8664	6.78373	14.4171	16.3355	9.28905	6.98839	9.98429	12.5333	17.5384	16.8734	16.9991	15.6635	15.3374	14.4752	12.8387	12.6578	12.7067	11.3706	1.10134	0.984851	1.10984	0.433093	0.939999	1.12852	0.723518	0.552103	0.785752	1.10225	0.164134	0.166937	0.023804	0.019766
Dgkd	8	24.9128	19.3678	19.4451	17.2238	19.1091	15.4658	5.20187	5.23637	5.99058	7.38242	50.9322	52.6908	59.3432	53.8866	37.5872	34.4854	13.6101	17.4359	10.9804	11.1579	0.489137	0.367574	0.327672	0.31963	0.508393	0.448476	0.382206	0.300321	0.54557	0.66163	0.274255	0.171501	0.0481366	0.000542013
Fkrp	8	10.438	5.78919	9.13498	16.5709	8.78197	12.0981	6.56819	5.74179	11.0124	12.8498	18.2756	14.3756	14.6368	17.0957	14.0172	17.427	13.9082	14.3058	13.5784	13.9607	0.571146	0.402711	0.624112	0.969301	0.626514	0.694217	0.472252	0.401362	0.811019	0.920427	0.113677	0.645953	0.0458878	0.000312452
Hint2	8	30.3425	52.2576	24.3063	22.9382	40.3082	28.3815	8.86682	12.4019	41.1852	22.4682	21.1185	23.6702	19.4298	16.9212	14.8286	16.7446	11.7292	13.8527	9.43541	8.8294	1.43677	2.20774	1.25098	1.35559	2.71826	1.69496	0.755961	0.895273	4.36496	2.54471	0.436652	0.170022	0.000866489	9.37477e-07
Slc25a39	8	26.1029	46.6492	33.6595	26.859	28.8753	43.1406	9.66201	14.5465	15.2996	10.5657	102.865	75.4141	82.6855	69.7075	77.3175	70.2951	37.9619	47.3337	29.0861	28.3567	0.253757	0.618573	0.407079	0.38531	0.373464	0.613707	0.254519	0.307318	0.52601	0.372599	0.988193	0.543742	0.039998	0.0142592
Srp19	8	52.4944	26.1029	35.8163	36.9477	47.7195	51.7519	12.0605	11.7146	29.7074	33.6535	31.4061	30.1693	26.5028	25.6124	24.7603	27.7398	15.7204	21.534	16.6991	17.9556	1.67147	0.865213	1.35141	1.44257	1.92726	1.86562	0.767192	0.544002	1.77898	1.87426	0.619584	0.386558	9.99935e-05	4.79787e-05
Stard3	8	47.8706	35.94	24.8791	24.7145	24.8858	22.1035	47.5397	50.6256	78.0155	117.629	39.5267	35.8741	30.2769	32.211	28.794	28.3456	90.4477	85.4799	132.794	117.572	1.2111	1.00184	0.82172	0.767269	0.864269	0.779784	0.525605	0.592252	0.587492	1.00048	0.316888	0.854573	0.0373688	0.0287865
Akr1c13	8	22.5439	13.8431	7.35267	7.91268	25.2896	7.46556	9.83478	8.85791	24.5395	12.1369	13.5433	12.7532	13.1995	10.3518	9.24465	11.2345	7.67154	8.06161	6.67652	6.70996	1.66458	1.08546	0.557042	0.764377	2.7356	0.664523	1.28198	1.09878	3.67549	1.80878	0.0433416	0.0407108	0.650044	0.00697974
Pcsk7	8	5.05186	11.3944	8.45797	15.531	5.85605	10.1493	13.5883	8.71828	16.5818	25.0458	13.6819	13.7973	10.3135	11.6632	13.1143	14.234	29.3825	27.9957	38.4533	34.5577	0.369237	0.825838	0.820089	1.33163	0.446539	0.71303	0.462463	0.311415	0.431218	0.724755	0.0347156	0.0665387	0.0235313	0.00784284
Taz	8	29.843	27.3103	27.2531	129.724	48.5427	16.1418	20.9882	5.79396	20.9901	29.9907	29.8353	30.6595	26.3086	29.693	16.835	22.8666	16.9574	16.3457	17.0135	17.4096	1.00026	0.890764	1.0359	4.36882	2.88344	0.705909	1.23771	0.354463	1.23373	1.72265	0.0155364	0.312202	0.00807801	0.00256562

## Sheet: all genes
gene name	RFL 0hA	RFL 0hB	RFL 1hA	RFL 1hB	RFL 2hA	RFL 2hB	RFL 4hA	RFL 4hB	RFL 6hA	RFL 6hB	FL 0hA	FL 0hB	FL 1hA	FL 1hB	FL 2hA	FL 2hB	FL 4hA	FL 4hB	FL 6hA	FL 6hB	TE 0hA	TE 0hB	TE 1hA	TE 1hB	TE 2hA	TE 2hB	TE 4hA	TE 4hB	TE 6hA	TE 6hB
0610007P14Rik	94.7588	93.7759	72.1127	122.202	88.5832	24.4066	33.6996	40.8827	39.2051	29.8754	40.8854	42.1956	34.2919	27.25	31.5369	27.2744	19.0866	19.3405	19.1629	16.0888	2.31767	2.22241	2.10291	4.48447	2.80887	0.894854	1.76561	2.11384	2.04589	1.8569
0610009B22Rik	94.0804	84.9194	26.6732	13.9456	1.03469	29.9335	11.608	11.9382	21.6247	19.4653	39.0314	27.8116	22.444	20.1422	15.2872	15.0274	9.70386	9.14382	9.08262	7.64934	2.41038	3.05338	1.18843	0.692358	0.0676837	1.99192	1.19622	1.30561	2.38089	2.54471
0610009O20Rik	8.14688	20.3331	12.3998	24.6354	8.85352	7.08196	3.20405	4.28376	2.38755	1.5351	12.0663	12.6648	10.1325	8.58623	6.30396	6.57092	3.0575	3.28105	2.37505	2.33908	0.675176	1.60549	1.22376	2.86917	1.40444	1.07777	1.04793	1.30561	1.00526	0.656284
0610010K14Rik	18.3635	41.6653	13.9748	64.3636	5.61819	11.6095	9.26899	4.32148	7.82786	6.71066	6.5346	5.84082	7.91787	6.25577	5.50043	6.46306	3.31384	4.38568	2.16302	3.6648	2.81019	7.13347	1.76497	10.2887	1.02141	1.79629	2.79705	0.985363	3.61895	1.83111
0610030E20Rik	3.12929	16.4881	3.57215	39.0336	13.1641	3.62699	5.79155	8.10059	25.6782	7.07574	5.13136	5.67335	2.90387	4.14468	3.28062	3.15494	3.80471	3.95535	5.02766	6.42439	0.609836	2.90623	1.23013	9.41776	4.01268	1.14962	1.52221	2.04801	5.10739	1.10139
0610037L13Rik	44.2145	38.1461	23.6781	21.0454	28.4738	8.85745	26.0645	26.4943	42.2323	12.3426	17.6708	14.0632	13.1699	10.4743	12.9166	10.9626	12.8401	13.8802	11.7122	12.3825	2.50212	2.71248	1.79789	2.00924	2.20443	0.807969	2.02993	1.90878	3.60584	0.996775
1110004E09Rik	4.47819	5.96092	8.86069	7.44789	4.52124	9.68879	2.65217	3.47772	4.19965	2.25017	6.82213	5.01376	4.52498	3.76129	5.00773	4.83996	2.35569	2.93005	0.881951	1.67488	0.656421	1.18891	1.95817	1.98014	0.902852	2.00183	1.12586	1.18691	4.76177	1.34348
1110004F10Rik	96.2577	74.9012	43.7333	61.9076	18.5341	38.8542	38.8206	39.05	23.5781	24.5444	60.3401	57.8513	48.7355	46.5967	46.3323	52.4921	38.3577	42.799	36.8574	33.4665	1.59525	1.29472	0.897362	1.32858	0.400025	0.740192	1.01207	0.912404	0.639713	0.733404
1110008F13Rik	207.865	287.659	170.474	283.769	151.681	140.345	171.064	160.642	317.008	278.863	180.408	148.021	136.085	127.649	112.233	125.009	151.828	149.649	242.133	224.386	1.15219	1.94337	1.2527	2.22304	1.35149	1.12268	1.12669	1.07346	1.30923	1.24278
1110008P14Rik	59.4565	79.8369	111.927	99.3582	45.6354	55.6139	30.1161	56.7041	51.3564	25.1582	56.9416	49.9653	46.1392	36.9988	41.2421	50.2266	28.5742	31.1775	25.1383	31.0406	1.04417	1.59785	2.42586	2.68544	1.10653	1.10726	1.05396	1.81875	2.04295	0.810493
1110037F02Rik	16.1318	10.4126	9.9482	7.88486	8.42425	3.76099	9.67746	13.3198	7.82504	11.5997	8.66552	9.89043	8.21613	7.95167	7.73393	7.33562	8.50246	9.31965	7.53181	8.49159	1.8616	1.05279	1.21081	0.991598	1.08926	0.512702	1.1382	1.42921	1.03893	1.36602
1110038F14Rik	11.6934	16.8622	16.0179	11.4919	14.4294	13.5532	41.1192	54.486	46.606	35.2538	10.6389	10.6372	8.80142	7.85716	10.6244	12.2608	35.108	47.1807	24.6658	26.0505	1.09912	1.58522	1.81992	1.46261	1.35814	1.10541	1.17122	1.15484	1.8895	1.35329
1110059G10Rik	45.1715	33.4044	40.7421	50.5905	42.2276	25.8548	24.1515	27.0677	15.6896	34.4666	14.6904	16.709	9.14251	10.4849	8.68611	9.71557	7.63833	11.9416	6.93665	9.72594	3.0749	1.99919	4.45633	4.82509	4.86151	2.66117	3.16189	2.26668	2.26184	3.54378
1190002N15Rik	40.8388	30.3114	34.2782	47.2178	30.991	17.6343	6.89137	7.38463	7.04021	1.50886	25.1602	23.1519	22.8496	22.4276	16.1901	18.9398	6.0204	7.32315	5.66493	5.63989	1.62315	1.30924	1.50016	2.10534	1.91419	0.931068	1.14467	1.00839	1.24277	0.267533
1600012H06Rik	68.3643	80.476	38.2233	12.6568	7.04301	28.0295	29.4366	24.3785	45.7944	36.4544	35.867	34.0811	26.0376	25.6001	24.6563	29.4828	24.6486	23.3057	34.4913	32.1029	1.90605	2.36131	1.468	0.494402	0.285648	0.950707	1.19425	1.04603	1.32771	1.13555
1700021F05Rik	1.07801	13.7516	4.10191	21.1888	7.25584	4.99787	4.78833	13.2553	7.58221	15.1668	9.69389	10.9722	7.2248	7.66139	5.48927	6.60803	4.81477	6.19841	6.8162	7.23107	0.111205	1.25331	0.567754	2.76566	1.32182	0.756332	0.994508	2.13849	1.11238	2.09746
1700037H04Rik	41.1448	70.0899	32.43	26.661	23.078	31.7925	15.2298	14.2646	13.7806	36.1799	25.6505	17.2933	15.7572	14.146	17.3125	15.6447	11.2302	9.54173	8.60586	6.75041	1.60405	4.05301	2.05811	1.8847	1.33302	2.03216	1.35615	1.49497	1.6013	5.35965
1810011H11Rik	135.264	145.448	109.24	100.169	51.0954	27.7292	3.06539	8.93235	12.9439	19.419	47.8943	52.6811	36.432	43.696	14.8833	18.7025	1.50691	0.957815	2.14602	1.23445	2.82421	2.76092	2.99845	2.29241	3.43307	1.48265	2.03422	9.32576	6.03158	15.7309
1810013L24Rik	30.1266	31.3293	64.4814	82.5593	69.1758	62.5616	44.2571	44.4768	48.5594	51.5632	11.4539	11.5586	25.4325	25.4862	19.1757	20.1984	18.5481	19.7863	24.6405	24.38	2.63025	2.71047	2.53539	3.23938	3.60747	3.09736	2.38607	2.24786	1.97071	2.11498
1810022K09Rik	45.6246	59.5402	57.1874	58.8378	15.0534	91.2458	44.7036	34.7369	50.3375	26.9708	43.1568	38.4133	39.8475	32.772	34.299	35.0671	29.5674	34.4547	28.5143	28.8037	1.05718	1.54999	1.43516	1.79537	0.438886	2.60203	1.51192	1.00819	1.76534	0.936365
1810030O07Rik	27.5469	35.0501	30.8288	33.6873	19.0865	1.87813	16.4944	17.8272	11.3972	8.95634	18.5141	16.6989	13.1154	13.7671	9.86905	11.4358	8.48373	8.79503	10.0358	8.69547	1.48789	2.09894	2.35057	2.44695	1.93398	0.164232	1.94424	2.02697	1.13565	1.03
2010107E04Rik	655.413	581.614	481.578	249.447	271.277	370.222	296.142	277.895	190.753	279.361	225.228	179.712	175.702	166.753	175.105	156.765	115.073	110.233	100.265	95.3693	2.90999	3.23638	2.74088	1.49591	1.54922	2.36163	2.57351	2.52099	1.90248	2.92925
2210016F16Rik	38.2641	42.0201	43.0968	20.8273	12.4481	17.7399	23.7947	16.3435	37.6783	23.0721	43.6381	39.676	30.4577	27.6391	27.2779	27.4056	19.3308	21.8116	20.4659	20.72	0.876851	1.05908	1.41497	0.753543	0.456343	0.647311	1.23092	0.749304	1.84103	1.11351
2210016L21Rik	7.10045	10.6891	22.3861	23.7716	6.2584	13.3244	7.50926	16.4111	2.37815	15.2905	9.9799	10.3887	8.05318	9.43716	9.21616	9.32669	7.75208	9.60329	5.94053	7.01022	0.711475	1.02891	2.77978	2.51893	0.679068	1.42863	0.968677	1.70891	0.400326	2.18118
2310011J03Rik	71.3478	80.4617	34.3879	48.5436	18.6754	95.5592	25.5292	18.4694	44.6067	64.5308	31.7019	28.2911	26.2381	27.3508	23.2705	27.2385	20.8902	30.1785	29.8286	28.9085	2.25059	2.84406	1.31061	1.77485	0.802535	3.50824	1.22207	0.612003	1.49543	2.23224
2310022A10Rik	34.5621	55.0674	41.6053	5.70069	7.40185	20.3937	4.18687	6.91349	5.89317	11.3672	13.6949	13.3116	11.4683	11.2869	6.7134	6.69032	3.27444	3.64437	5.17837	5.82462	2.52371	4.13679	3.62785	0.505073	1.10255	3.04825	1.27865	1.89703	1.13803	1.95158
2310022B05Rik	2.4104	14.7056	8.56028	11.5406	3.60529	8.07088	6.24549	4.67973	3.76746	11.7079	3.74004	3.6289	3.81078	3.68568	3.44951	3.30501	1.99364	2.11078	2.12372	2.12313	0.644486	4.05235	2.24633	3.13121	1.04516	2.44201	3.1327	2.21707	1.77399	5.51447
2310036O22Rik	112.345	88.8949	76.3766	35.1045	71.4159	70.6045	59.882	73.6746	63.2145	43.6551	101.263	93.8596	84.174	93.9731	73.8824	82.1556	66.3826	86.7231	78.255	79.1037	1.10944	0.947106	0.907365	0.37356	0.966616	0.8594	0.902073	0.849538	0.807801	0.551871
2410015M20Rik	181.738	190.664	181.63	203.602	167.028	206.413	129.678	103.443	112.938	104.521	96.1328	96.3881	76.0828	74.4123	67.3348	71.8783	57.3736	59.0426	51.2938	46.9999	1.89049	1.97808	2.38726	2.73613	2.48056	2.87171	2.26025	1.75201	2.20179	2.22387
2410089E03Rik	1.20884	0.938639	1.22659	2.19326	0.542429	0.186814	0.536946	0.36508	0.566828	0.48593	1.74779	1.98911	1.96932	1.85362	1.35984	1.3455	1.04783	1.11051	1.01912	1.30721	0.691643	0.471888	0.622853	1.18323	0.398893	0.138843	0.512437	0.32875	0.556191	0.37173
2510009E07Rik	41.6677	50.8419	54.6991	18.8999	46.1582	52.3193	7.32608	4.71898	2.44225	4.18738	13.7754	12.4579	13.6405	13.797	19.8652	18.7361	4.85933	5.7314	4.0491	3.59959	3.02479	4.08109	4.01004	1.36986	2.32357	2.79244	1.50763	0.823355	0.603158	1.1633
2510039O18Rik	46.4005	48.0837	23.8507	25.8467	35.3861	39.6276	21.8457	28.1846	41.0334	33.1319	62.7814	50.2565	42.1347	49.8857	44.7025	55.4147	43.1852	41.5608	67.0605	62.5798	0.739081	0.956765	0.566058	0.518119	0.791591	0.71511	0.505859	0.678155	0.611886	0.529435
2610002M06Rik	26.2457	40.0304	11.984	15.8729	15.4572	34.4759	17.4868	43.312	55.3798	31.6506	5.27553	5.59309	4.46509	3.05226	5.634	4.33957	6.96821	8.45609	8.02543	8.26902	4.97498	7.15713	2.68393	5.20038	2.74355	7.94456	2.50951	5.12199	6.90054	3.82762
2610507B11Rik	22.0408	24.4488	20.2163	18.2408	13.2735	11.2045	5.36738	5.93077	5.98338	5.8289	136.002	139.692	134.655	121.971	103.325	99.318	54.5459	61.4566	38.6102	40.9202	0.162062	0.175019	0.150134	0.14955	0.128463	0.112814	0.0984012	0.0965034	0.154969	0.142446
2700049A03Rik	5.0708	2.61151	4.68586	3.6965	3.96156	0.279871	0.201103	0.820403	2.12295	0.727984	3.33367	3.39852	3.06232	2.65604	1.31996	1.43146	0.745944	0.825857	0.375437	0.294492	1.52109	0.768427	1.53017	1.39173	3.00126	0.195514	0.269596	0.993396	5.65461	2.472
2700060E02Rik	51.2443	62.1718	31.6855	47.6173	29.3416	14.8486	58.8803	60.1083	62.5742	46.1335	73.3	66.2152	67.4766	50.9729	63.5289	55.1947	67.6558	68.37	77.8497	65.5788	0.699103	0.938935	0.469578	0.934168	0.461862	0.269023	0.870292	0.879162	0.803782	0.703482
2810004N23Rik	16.6421	21.0243	26.0334	10.4842	8.29735	12.8593	4.10674	1.79502	15.1735	1.39371	11.2484	14.7625	10.5815	12.4248	6.92339	10.7383	4.31295	6.96593	3.68966	4.20968	1.47952	1.42417	2.46027	0.843811	1.19845	1.19753	0.952189	0.257685	4.11244	0.331072
2810403A07Rik	21.2112	14.823	10.6537	4.48984	10.4696	5.57254	11.934	13.1779	5.96756	13.0028	12.9253	13.0614	7.56709	8.33219	6.26869	8.21185	11.3263	12.2382	9.16831	10.7443	1.64105	1.13487	1.4079	0.538855	1.67014	0.678598	1.05366	1.07679	0.65089	1.21021
2810428I15Rik	86.2238	96.4979	74.9914	54.7073	89.8164	44.02	51.2933	51.8147	39.7084	20.8889	49.1928	45.9368	41.1176	38.4983	35.0506	43.962	27.6603	35.9467	20.269	27.0407	1.75277	2.10066	1.82383	1.42103	2.56248	1.00132	1.8544	1.44143	1.95908	0.772501
2810474O19Rik	16.7808	11.9394	23.6059	13.0703	37.1739	24.4923	45.1114	55.3962	35.3687	34.1536	13.8436	17.3062	15.7992	17.8398	32.883	37.5827	47.3751	52.1841	35.5173	39.1676	1.21217	0.68989	1.49412	0.73265	1.13049	0.651691	0.952217	1.06155	0.995815	0.871985
3110002H16Rik	23.7704	20.215	25.0239	33.5438	16.4437	6.73469	11.7315	17.1779	15.7901	7.56455	13.7472	13.8107	12.7447	10.3409	9.84931	10.0015	9.12249	9.81871	12.5454	13.9798	1.72911	1.46372	1.96348	3.2438	1.66953	0.673369	1.286	1.74951	1.25864	0.541107
3110043O21Rik	16.1815	8.67551	45.5629	74.6202	57.1796	91.2747	25.3559	26.529	16.4396	28.4577	15.6922	15.509	57.1713	59.1035	78.5191	81.2224	24.9472	27.8588	23.3702	25.0633	1.03118	0.559385	0.796954	1.26253	0.728226	1.12376	1.01638	0.952265	0.703444	1.13543
3110082I17Rik	41.2409	30.2518	22.2731	88.503	15.67	27.7549	13.7881	15.4971	6.23803	9.35855	12.6667	10.5785	10.562	8.50928	6.50854	8.47674	3.89519	6.79208	3.58533	3.24498	3.25585	2.85973	2.1088	10.4008	2.40761	3.27425	3.53977	2.28164	1.73988	2.884
3830406C13Rik	56.4503	26.4921	28.0888	26.2616	15.8314	8.38827	24.1098	40.7476	15.2709	22.91	25.7256	25.8276	20.8192	20.1998	17.1254	17.6868	12.0676	14.7439	12.3778	15.6229	2.19432	1.02573	1.34918	1.30009	0.924439	0.474267	1.9979	2.76369	1.23373	1.46644
4930402H24Rik	4.19593	10.901	9.9156	7.01185	4.33537	5.80181	8.58308	9.14673	6.21308	15.2023	6.79866	7.9092	7.53688	7.56209	4.21143	4.57765	8.09895	8.30836	10.0491	10.7554	0.617171	1.37826	1.31561	0.927237	1.02943	1.26742	1.05978	1.10091	0.618271	1.41346
4930453N24Rik	3.71246	5.35347	3.95533	0.561307	6.66339	1.14744	6.59603	8.16868	1.74078	1.49233	17.6738	15.1616	21.4358	17.9413	27.9482	25.8709	24.9454	26.0938	18.3941	16.1488	0.210055	0.353093	0.18452	0.0312857	0.238419	0.0443528	0.264419	0.313051	0.0946378	0.0924113
4931406P16Rik	3.66436	6.09704	5.94906	4.43227	5.20682	2.07639	6.14886	4.90094	1.14548	3.55974	9.07128	9.04437	9.26921	8.63346	6.80505	6.87649	8.30437	9.5055	8.73603	9.22607	0.403951	0.674125	0.641809	0.513383	0.765141	0.301955	0.740437	0.51559	0.131121	0.385835
4932438A13Rik	4.34844	4.278	4.53048	5.75281	2.09059	4.60004	9.56167	9.04542	14.0787	11.4451	6.6869	8.72668	7.93695	8.308	6.04729	6.38823	27.7914	25.2697	26.7436	28.5054	0.650292	0.49022	0.570809	0.692442	0.345707	0.72008	0.344051	0.357955	0.526432	0.401507
4933434E20Rik	34.9465	27.3632	15.644	35.743	18.4484	21.4436	13.316	7.31692	9.63909	17.0433	39.2543	39.6229	38.6818	33.0044	33.9683	35.9791	23.1574	22.4169	25.3566	26.1992	0.890259	0.690589	0.404428	1.08298	0.543105	0.596003	0.575018	0.326401	0.380142	0.650527
5031439G07Rik	45.296	47.668	44.1934	15.8043	30.6179	40.3847	13.1121	16.9117	24.5069	14.5898	101.369	85.4086	74.3062	75.9017	56.8794	63.2315	31.7294	36.2689	30.3077	29.0615	0.446844	0.558117	0.594746	0.208221	0.538296	0.63868	0.413249	0.466288	0.808603	0.502031
5430427O19Rik	28.5631	13.9216	57.965	67.3965	25.7306	47.4853	84.261	75.6199	32.4685	29.5743	17.9474	18.7206	34.6267	33.3854	24.716	26.5283	47.8934	50.6258	30.0556	28.185	1.59149	0.743653	1.674	2.01874	1.04105	1.78998	1.75934	1.4937	1.08028	1.04929
5730508B09Rik	9.88408	3.28918	13.5394	41.8439	34.3725	30.5496	104.636	150.959	120.501	123.169	10.8749	14.9645	11.8218	14.1769	27.0401	41.4548	112.228	153.74	145.586	174.55	0.90889	0.219799	1.1453	2.95157	1.27117	0.736938	0.932351	0.981909	0.827698	0.705636
9030617O03Rik	18.4933	17.017	12.1545	31.4561	8.01536	24.0327	8.86779	11.6961	1.9708	7.60286	11.8721	12.7	11.3107	9.58577	9.94559	10.1021	7.65485	8.41669	4.68337	4.8526	1.55771	1.33992	1.0746	3.28154	0.805921	2.37898	1.15845	1.38963	0.420808	1.56676
9030624J02Rik	35.9932	42.1113	36.7883	32.1754	23.8725	34.7141	20.422	20.2329	20.9426	17.8216	36.4105	38.4729	35.9468	35.3235	29.248	28.9034	24.1333	27.8033	23.2294	22.0661	0.98854	1.09457	1.02341	0.910878	0.816211	1.20104	0.846218	0.727715	0.901555	0.807649
9130011E15Rik	15.8978	9.02725	12.3865	23.7505	1.69848	8.77441	5.04393	6.85892	5.32463	3.99411	5.24582	4.81578	3.98085	3.7417	2.98562	2.99191	2.68617	2.79558	3.1192	2.63135	3.03056	1.87452	3.11151	6.34752	0.568886	2.93271	1.87774	2.45349	1.70705	1.5179
9530068E07Rik	235.675	243.7	243.189	178.92	212.847	234.577	233.244	263.031	341.827	315.119	86.4192	76.7393	74.4438	82.5853	76.3751	88.8408	115.073	115.73	130.994	131.779	2.72712	3.17568	3.26675	2.16649	2.78687	2.64042	2.02692	2.2728	2.60947	2.39128
A630001G21Rik	12.4667	16.9716	15.5247	10.2813	15.2564	4.37863	41.9506	58.6758	29.2282	45.5577	11.3904	15.2842	12.0361	12.3747	12.8998	15.9053	28.4589	30.167	35.8887	35.9375	1.0945	1.1104	1.28985	0.83083	1.18268	0.275293	1.47407	1.94504	0.814411	1.26769
A630033H20Rik	8.79168	13.0029	30.6652	27.1391	6.16403	39.6276	10.0339	13.2758	29.2005	17.3022	17.2842	17.9432	26.3636	24.7561	14.2642	16.8411	19.0152	15.4703	28.4021	21.0574	0.508653	0.72467	1.16316	1.09626	0.432134	2.35303	0.527679	0.858145	1.02811	0.82167
AA467197	15.7742	5.24926	7.20261	83.4744	90.2464	92.6339	393.537	430.794	894.98	1276.1	1.66879	4.0138	5.52986	4.48426	19.2144	22.6465	130.416	165.761	286.791	333.461	9.45246	1.3078	1.30249	18.615	4.6968	4.09042	3.01755	2.59889	3.12067	3.82685
AB124611	145.141	124.582	95.5518	125.398	89.8086	112.15	103.611	121.512	207.952	218.21	76.165	71.9583	61.7607	69.9583	50.145	56.1167	78.659	73.2564	138.088	118.15	1.90562	1.73131	1.54713	1.79247	1.79098	1.99852	1.31722	1.65872	1.50594	1.8469
AI314180	20.0616	23.2719	21.503	23.1763	16.4032	12.1174	21.9114	25.8746	22.8547	20.1608	20.4016	22.4411	20.5101	17.9727	19.1698	19.0295	22.7089	24.9582	18.5615	20.3719	0.983333	1.03702	1.04841	1.28953	0.855683	0.636768	0.964879	1.03672	1.2313	0.989637
AI413582	84.4598	55.3606	27.2682	94.807	12.92	35.5974	15.1578	9.93798	24.002	5.1441	123.739	97.3613	94.473	87.4747	66.9512	65.0252	38.1037	39.7081	49.0791	46.8213	0.682563	0.56861	0.288635	1.08382	0.192976	0.54744	0.397803	0.250276	0.489047	0.109867
AI467606	64.2201	41.9785	20.0726	58.9522	11.5781	7.97508	2.12242	3.71077	13.4432	9.2197	19.2901	17.6542	4.37495	4.29736	2.74799	3.14483	1.53658	1.93268	5.76519	4.89516	3.32917	2.37782	4.58807	13.7182	4.21331	2.53594	1.38126	1.92001	2.3318	1.88343
AI837181	42.4594	48.0594	13.8481	10.4811	12.6367	25.4432	39.7721	44.862	52.8205	33.0906	12.3756	9.48103	5.62869	6.5502	9.17075	11.6716	19.7379	19.7576	20.793	17.5429	3.43089	5.069	2.46027	1.60012	1.37794	2.17993	2.01502	2.27062	2.5403	1.88627
AI987944	8.2769	1.76561	7.7524	5.2945	2.4998	0.491965	2.59236	2.47222	2.98542	2.87926	8.95841	9.23439	5.9082	4.60716	4.32269	4.6217	3.53877	4.03955	4.1577	4.19309	0.923925	0.191199	1.31214	1.14919	0.578297	0.106447	0.732562	0.612003	0.718045	0.686667
AU040320	15.7839	13.3966	12.3758	12.6555	10.3287	7.39164	10.2685	6.34551	14.5779	13.8192	9.63944	9.41697	9.22214	10.0587	7.56923	8.17848	8.47382	8.73651	11.3038	11.2681	1.63743	1.4226	1.34196	1.25816	1.36456	0.903792	1.2118	0.726321	1.28965	1.2264
AW209491	7.96209	3.7366	4.19487	18.0575	5.4965	5.20578	3.17388	1.98182	1.43593	0.615499	5.18357	5.33769	2.58914	2.41382	4.09713	4.89051	1.42854	1.91259	1.46016	1.84251	1.53602	0.70004	1.62018	7.48087	1.34155	1.06447	2.22177	1.0362	0.98341	0.334054
Aaas	26.2093	25.1082	21.7588	15.1304	18.71	27.9843	9.525	11.4105	8.93785	1.43667	17.191	13.9444	15.1332	11.9458	11.8471	9.26284	6.55061	8.88134	4.12446	3.56455	1.52459	1.8006	1.43782	1.26659	1.57929	3.02114	1.45406	1.28477	2.16704	0.403044
Aacs	18.569	20.8123	24.7297	7.01887	12.8021	11.0601	9.16445	7.26033	8.16283	10.8855	12.8918	13.1659	10.4106	9.64774	7.06837	8.01891	6.75771	7.1141	4.77181	4.71806	1.44037	1.58077	2.37543	0.727514	1.81119	1.37925	1.35615	1.02055	1.71064	2.3072
Aak1	8.3897	9.45639	11.3276	11.4573	11.2331	3.76415	5.20915	4.90404	4.44154	4.48758	3.37848	2.8923	3.51596	2.60532	2.10766	2.05186	1.58481	1.55611	1.3886	1.41928	2.48327	3.26951	3.22178	4.39764	5.32966	1.83451	3.28693	3.15146	3.19857	3.16186
Aamp	60.7859	82.3005	57.5968	45.9527	68.1893	61.7046	50.0735	47.8229	47.5043	51.205	59.3264	55.3863	56.4686	57.1769	54.9789	54.1704	52.4054	58.9902	56.4596	48.5022	1.0246	1.48594	1.01998	0.803695	1.24028	1.13908	0.955502	0.810692	0.841386	1.05573
Aar2	15.4722	26.49	16.3819	18.8162	27.1668	32.2273	43.8243	41.3578	28.3888	27.3792	9.18053	9.75679	8.0458	6.43244	13.03	10.96	19.6295	19.2397	13.2136	11.8415	1.68532	2.71503	2.03608	2.92521	2.08494	2.94046	2.23257	2.14961	2.14845	2.31215
Aars	38.0571	44.1473	42.0152	28.7703	47.0517	45.9738	62.0022	74.7542	70.3747	62.8895	25.9432	25.7098	25.9479	21.6965	28.7658	29.3766	41.4832	46.0575	40.0175	39.6374	1.46694	1.71714	1.61922	1.32603	1.63568	1.56498	1.49463	1.62306	1.7586	1.58662
Aarsd1	40.4149	38.8763	28.3534	23.3919	19.4808	25.3731	18.6995	15.5294	8.88308	9.51911	21.712	19.6837	15.952	14.1165	12.7991	12.6822	12.9113	14.0855	9.45841	9.0108	1.86141	1.97505	1.77742	1.65706	1.52205	2.00068	1.44831	1.10251	0.939174	1.05641
Aasdhppt	44.7489	14.6657	31.7326	29.216	7.9862	29.8622	10.1642	12.5053	7.15322	9.19847	10.8669	14.9448	12.5834	11.4332	10.662	9.5153	7.11636	7.05758	4.4803	4.50661	4.1179	0.981324	2.52177	2.55536	0.749033	3.13834	1.42828	1.77189	1.59659	2.0411
Aatf	11.3594	9.58731	15.0342	17.5483	9.69571	10.3039	6.21565	11.1868	6.94754	5.45965	9.71844	10.5564	9.67544	9.18993	8.58022	9.56037	5.66174	6.90361	2.27812	3.19242	1.16885	0.908196	1.55385	1.90951	1.13001	1.07777	1.09783	1.62043	3.04968	1.71019
Aatk	5.692	5.76957	2.98737	7.27062	0.550453	0.909972	0.217955	0.381065	0.46017	0.493118	2.5748	1.83541	1.33567	1.72463	0.783877	0.870693	0.116885	0.18485	0.203449	0.279274	2.21066	3.14347	2.23661	4.21575	0.702218	1.04511	1.8647	2.06148	2.26184	1.76572
Abca1	44.4202	33.3581	39.4821	63.3433	52.4055	52.3277	29.443	24.5129	75.8874	105.083	19.0766	23.9201	24.5571	27.8465	27.8711	29.6155	26.0712	22.1888	74.2765	78.3037	2.32852	1.39456	1.60777	2.27473	1.88028	1.7669	1.12933	1.10474	1.02169	1.34199
Abca2	10.9795	11.5878	9.89685	12.0877	9.5066	9.47223	4.41919	5.1049	5.99801	2.99948	11.9087	10.7615	13.5298	13.5331	11.1326	11.0738	8.2947	8.39591	5.9887	5.60756	0.921973	1.07679	0.731485	0.893195	0.85394	0.855375	0.532772	0.608023	1.00155	0.5349
Abca3	19.3158	16.6178	18.8664	6.78373	14.4171	16.3355	9.28905	6.98839	9.98429	12.5333	17.5384	16.8734	16.9991	15.6635	15.3374	14.4752	12.8387	12.6578	12.7067	11.3706	1.10134	0.984851	1.10984	0.433093	0.939999	1.12852	0.723518	0.552103	0.785752	1.10225
Abca7	17.6021	9.62974	9.65928	7.78491	12.8953	10.0852	9.17479	7.05178	12.9138	14.8011	9.29818	8.80549	8.95103	10.3513	7.30481	7.89048	9.44829	8.96236	13.4482	12.7734	1.89307	1.09361	1.07912	0.752073	1.76531	1.27814	0.971053	0.786822	0.960266	1.15875
Abca9	15.3595	7.18772	9.74065	11.2486	2.423	7.78854	5.09312	4.34877	1.50043	4.42163	7.6676	10.1473	7.2585	8.88987	5.76679	7.42008	4.28755	3.12465	2.88565	3.09605	2.00317	0.708339	1.34196	1.26532	0.420164	1.04966	1.18788	1.39176	0.519964	1.42815
Abcb1b	21.3518	16.2408	15.9395	9.53115	14.3714	15.5557	19.495	15.134	5.72107	9.19605	20.9751	23.2457	28.9343	24.7392	25.4603	24.7661	16.8124	16.7926	9.21118	8.0519	1.01796	0.698659	0.550886	0.385264	0.564462	0.628106	1.15956	0.901229	0.621101	1.1421
Abcb4	15.0479	15.3385	13.1539	5.68794	10.2653	7.85642	4.89258	6.8432	4.76756	3.16753	22.6747	23.181	23.9022	22.6503	20.9733	20.3705	10.4447	10.5836	4.48966	4.44756	0.663645	0.661686	0.550323	0.25112	0.489445	0.385676	0.468428	0.646586	1.0619	0.712194
Abcb6	13.5657	13.6798	9.38514	18.8791	3.9774	6.67047	7.76027	6.98341	4.33701	4.18279	11.1224	10.532	9.37776	8.7646	8.55764	9.39973	7.97142	7.7481	8.19718	6.31704	1.21967	1.29887	1.00079	2.15402	0.464778	0.709644	0.973511	0.901306	0.529086	0.662144
Abcb7	39.3369	54.9259	43.3282	6.26058	31.9346	37.0612	25.9281	25.4572	18.6069	12.657	16.9382	22.3456	18.7141	18.5039	14.5043	17.1718	12.021	13.1871	9.94325	9.39863	2.32237	2.45802	2.31527	0.338338	2.20173	2.15826	2.15689	1.93047	1.87131	1.34669
Abcb8	20.2737	19.276	19.8367	21.8949	15.8388	13.1478	5.76226	7.73161	5.94147	7.09452	17.5415	14.7853	14.3339	14.7593	11.603	12.5267	8.0129	7.57279	6.26686	5.93123	1.15576	1.30373	1.3839	1.48347	1.36506	1.04958	0.719123	1.02097	0.948078	1.19613
Abcc1	63.6615	49.2433	42.1168	72.7674	69.8915	77.3939	81.8783	79.4318	74.4283	75.5775	42.3132	45.2165	46.0526	40.5934	63.884	69.2015	77.4062	66.864	66.9558	61.0778	1.50453	1.08905	0.914535	1.79259	1.09404	1.11839	1.05777	1.18796	1.1116	1.2374
Abcc3	134.646	86.8723	85.4758	101.016	68.6393	82.969	42.8366	43.6789	23.5759	33.3998	53.7325	53.3433	51.0154	50.588	41.3346	43.1099	33.5535	31.7652	24.539	22.2901	2.50585	1.62855	1.67549	1.99684	1.66058	1.92459	1.27667	1.37505	0.960754	1.49842
Abcc4	14.6983	8.15206	9.99247	17.0377	7.80454	11.8116	15.7415	14.3316	9.1894	14.3771	9.97255	9.58697	8.87072	8.19221	8.58996	8.80433	12.3709	12.4924	13.4275	13.2812	1.47388	0.850327	1.12646	2.07975	0.908565	1.34157	1.27245	1.14723	0.68437	1.08252
Abcc5	53.6934	73.4105	84.5735	91.5656	42.7233	86.8369	107.231	70.3044	122.957	185.72	54.8221	69.9805	58.9666	59.7001	66.5755	71.9094	90.8439	77.925	112.929	138.532	0.979411	1.04901	1.43426	1.53376	0.641727	1.20759	1.18038	0.902206	1.0888	1.34062
Abcd1	52.0448	54.025	42.2829	20.7357	35.3062	26.9005	21.6074	21.3921	25.5581	19.4367	21.9122	19.1486	18.5278	17.0172	13.0962	13.3022	10.0519	10.9813	12.1198	10.922	2.37515	2.82135	2.28213	1.21851	2.69592	2.02226	2.14959	1.94805	2.10879	1.77958
Abcd3	22.9428	29.179	32.2103	8.07403	21.0778	22.6183	12.7385	16.8956	6.49183	19.6774	12.3451	13.7895	10.5635	10.9128	9.43924	9.28424	7.79325	8.88209	6.25283	6.12686	1.85845	2.11603	3.04921	0.739866	2.233	2.4362	1.63455	1.90221	1.03822	3.21166
Abcd4	11.1708	9.05514	5.8854	4.87205	6.74765	1.32795	2.54455	1.39025	2.01462	4.96539	3.81809	3.77172	2.92378	3.02572	1.50141	1.90594	1.06608	1.2778	1.53645	1.37986	2.92576	2.4008	2.01295	1.61021	4.4942	0.696742	2.38682	1.088	1.31121	3.59848
Abce1	87.7151	67.1935	59.8127	35.1249	52.1218	53.6849	46.1301	46.93	31.5599	23.3464	50.8081	56.5721	54.1747	46.3753	52.8069	50.3636	35.9011	39.1736	21.965	19.736	1.7264	1.18775	1.10407	0.757405	0.987026	1.06595	1.28492	1.198	1.43683	1.18294
Abcf1	27.3385	33.0822	19.15	4.69711	14.1143	19.4441	26.9084	31.9669	23.3074	30.2836	14.6254	14.98	14.158	14.5921	15.3229	14.2323	21.2139	25.0541	18.7737	20.8135	1.86925	2.20843	1.35259	0.321894	0.921128	1.36619	1.26843	1.27591	1.24149	1.455
Abcf2	48.7474	46.0538	34.2679	48.4071	30.8179	34.1556	44.4981	40.1025	22.2766	7.88799	27.6211	29.4331	22.3197	22.0198	22.3558	23.6905	23.7404	28.2379	20.8753	22.4037	1.76486	1.56469	1.53532	2.19834	1.37852	1.44175	1.87436	1.42017	1.06713	0.352084
Abcf3	20.1859	20.1521	12.848	8.0462	12.7632	17.5827	13.8568	11.6384	15.4885	15.4909	11.1435	13.3546	9.95242	9.08185	8.72132	9.14699	9.6896	11.8431	9.26344	10.3398	1.81145	1.509	1.29094	0.885965	1.46345	1.92224	1.43007	0.982714	1.672	1.49818
Abcg1	50.2817	67.6651	29.9594	55.1024	37.8224	29.5159	44.4376	38.342	113.316	108.503	21.9787	27.6715	17.9645	22.816	15.8004	17.0394	31.0653	30.0627	70.4216	66.7585	2.28774	2.44529	1.6677	2.41508	2.39377	1.73221	1.43046	1.2754	1.60911	1.62531
Abhd10	9.59626	7.25773	7.96677	12.5306	2.93591	4.71864	5.16664	6.2103	6.13594	4.38352	9.04462	8.04686	7.91554	6.42547	7.49081	8.37319	4.93541	5.70797	4.61177	4.25584	1.06099	0.901933	1.00647	1.95014	0.391936	0.563541	1.04685	1.088	1.3305	1.03
Abhd12	666.91	635.956	546.874	486.851	421.056	454.129	281.984	313.426	233.232	292.682	292.464	275.613	267.562	259.544	215.051	222.656	175.354	180.598	154.911	151.577	2.28032	2.30742	2.04391	1.8758	1.95793	2.0396	1.60809	1.73549	1.50558	1.93091
Abhd13	16.8362	18.2511	7.57106	17.9346	12.8773	28.3839	7.08175	9.40992	14.3537	7.30615	17.3257	16.1625	16.0968	13.5476	19.3314	18.4556	10.8997	8.19359	11.1452	8.80446	0.971748	1.12923	0.470345	1.32382	0.666136	1.53796	0.649722	1.14845	1.28788	0.829824
Abhd16a	18.2252	29.8061	30.2286	12.718	36.1717	37.1924	46.7036	49.2953	35.0597	54.4765	31.8382	24.4954	24.718	26.2976	25.4754	27.7786	47.1702	48.5046	52.1689	48.8812	0.572432	1.21681	1.22294	0.483617	1.41987	1.33889	0.990108	1.0163	0.672042	1.11447
Abhd17b	16.1589	27.3844	10.2476	11.5371	26.6869	9.7113	15.2854	23.8196	14.7329	23.0051	18.0447	14.1054	12.6809	11.2521	20.1671	20.9977	11.4048	13.0824	12.6086	13.9046	0.895496	1.94141	0.808117	1.02533	1.32329	0.462492	1.34026	1.82074	1.16848	1.65449
Abhd17c	20.1916	6.27132	52.2447	33.5816	54.362	68.0248	12.2573	18.294	5.68072	25.5673	21.0194	15.8759	31.1452	30.5266	40.4008	39.6068	12.5053	17.5349	12.3484	10.8024	0.960616	0.395021	1.67746	1.10008	1.34557	1.7175	0.980164	1.04329	0.460036	2.36681
Abhd2	57.3901	54.5174	56.6841	49.3857	58.5583	54.7239	31.8645	37.5356	25.7652	41.4149	21.6376	20.2347	19.0739	16.4094	17.8607	16.3487	17.6033	17.8853	16.2641	17.3244	2.65233	2.69426	2.97181	3.00959	3.27862	3.3473	1.81014	2.09869	1.58417	2.39055
Abhd4	25.5697	42.95	33.358	57.9902	32.7816	20.8866	17.0364	21.7483	17.1281	11.3797	22.4135	21.7961	16.6471	18.2667	15.2449	12.6097	10.1514	10.9361	8.36774	7.92982	1.14081	1.97053	2.00384	3.17465	2.15033	1.65639	1.67823	1.98867	2.04692	1.43506
Abhd5	35.4693	30.7378	40.4889	63.1245	16.5788	32.5459	10.1203	20.085	10.3947	20.7928	23.9996	25.4307	23.0857	20.7678	16.4527	16.5092	11.7347	11.318	18.6509	17.7539	1.47791	1.20869	1.75385	3.03953	1.00767	1.97138	0.862425	1.77461	0.557333	1.17117
Abi1	142.255	126.297	148.597	137.8	201.144	185.15	208.22	236.279	112.863	130.456	68.3807	70.0203	79.8624	79.8873	112.114	120.19	125.649	145.609	103.61	94.3768	2.08033	1.80372	1.86066	1.72493	1.79411	1.54048	1.65716	1.62269	1.08931	1.38229
Abl1	12.9478	10.5153	5.98243	12.41	5.44677	6.25294	1.45491	1.4963	4.87865	1.16177	11.8632	10.6339	9.53575	8.54463	3.94751	3.76698	1.99648	2.07436	3.93042	4.01355	1.09142	0.988841	0.627368	1.45238	1.3798	1.65994	0.728734	0.721329	1.24126	0.289462
Abl2	2.63964	3.46039	7.48735	10.8846	5.65307	7.60231	6.57299	5.2801	3.93823	1.32635	7.38755	8.77746	10.565	10.6822	10.8775	10.6645	8.86002	10.0985	4.86281	4.76065	0.357309	0.394236	0.708695	1.01894	0.519703	0.712864	0.741871	0.522858	0.809867	0.278607
Abr	40.7973	52.0953	54.1522	40.8833	65.1015	58.1605	78.3154	85.1424	54.1272	52.4408	36.034	37.8022	38.1519	33.4897	51.6274	51.7047	53.9896	67.1098	38.4692	39.8693	1.13219	1.3781	1.41939	1.22077	1.26099	1.12486	1.45057	1.2687	1.40703	1.31532
Abracl	153.946	211.677	270.92	167.295	417.346	411.38	426.186	402.66	375.965	304.58	150.988	123.637	190.475	165.356	260.978	249.108	312.114	317.629	309.502	288.016	1.01959	1.71209	1.42234	1.01173	1.59916	1.65142	1.36548	1.26771	1.21474	1.05751
Abt1	17.3045	13.8631	8.77931	5.81414	14.5591	9.65695	7.47283	12.4431	11.2696	4.34753	11.0858	12.3534	9.4167	9.25474	10.9424	13.7245	8.15817	11.5796	6.47722	7.50383	1.56096	1.12221	0.932312	0.628234	1.33052	0.703631	0.915994	1.07457	1.73988	0.579376
Acaa1a	44.7811	47.292	39.2142	40.346	22.365	23.7002	48.5921	53.9911	69.0342	68.1206	27.3867	23.1017	24.3513	20.1339	22.1718	21.5722	41.3106	40.0458	60.7246	49.1534	1.63514	2.04712	1.61036	2.00389	1.00871	1.09865	1.17626	1.34823	1.13684	1.38588
Acaa2	39.2685	31.58	27.3935	8.41105	16.8863	24.2741	30.7663	29.2249	18.413	37.1608	16.7557	18.3603	13.9011	14.5037	14.2453	11.7187	16.8241	19.3023	16.0779	15.751	2.34358	1.72001	1.9706	0.579926	1.1854	2.07139	1.8287	1.51406	1.14524	2.35926
Acaca	7.63967	6.69348	7.75185	1.25552	8.07331	4.44875	3.48356	4.58581	4.15333	2.22535	7.59024	8.0575	7.89987	6.42381	5.30625	5.43848	4.43413	4.61002	2.89211	2.86721	1.00651	0.830714	0.981263	0.195449	1.52147	0.818014	0.785624	0.994747	1.43609	0.776139
Acad11	11.0086	7.77081	7.36219	12.6094	6.36178	7.73299	4.32179	4.10186	3.12844	5.69914	4.05854	4.58374	3.47398	3.68556	2.56465	2.93277	2.25147	2.51339	2.28218	2.30548	2.71244	1.6953	2.11924	3.4213	2.48056	2.63675	1.91955	1.63201	1.37081	2.472
Acad9	7.4921	11.5425	12.3534	3.46124	10.0388	18.9755	12.0172	14.8151	1.9517	12.5486	8.58659	10.141	8.45446	6.6692	6.44145	7.88922	10.2452	10.0269	9.21123	8.57894	0.872535	1.13821	1.46117	0.518989	1.55847	2.40524	1.17296	1.47754	0.211882	1.46272
Acadl	55.5981	49.606	45.9901	54.366	66.4372	56.9694	58.1601	68.8329	63.7582	86.8464	14.2571	16.646	16.0138	14.798	15.8086	17.0599	18.1442	22.2267	21.2354	23.0938	3.89967	2.98006	2.87191	3.67388	4.20259	3.33938	3.20544	3.09686	3.00245	3.7606
Acadm	50.0461	47.9749	43.2579	37.3666	23.219	30.5545	22.8699	21.192	14.4856	13.0391	27.1916	33.4868	26.1828	24.9093	19.1852	23.7705	14.3496	17.671	8.99809	9.56985	1.8405	1.43265	1.65215	1.50011	1.21025	1.28539	1.59376	1.19926	1.60985	1.36252
Acads	43.5012	26.2249	29.7465	33.3625	7.07238	31.6647	9.33451	14.6881	14.781	20.2743	16.5409	15.4806	12.9358	12.1383	8.81254	12.0005	9.0419	10.4688	9.1489	8.32972	2.62992	1.69405	2.29955	2.74852	0.802535	2.63861	1.03236	1.40304	1.6156	2.43397
Acadsb	12.0301	19.683	14.6481	30.9213	15.5196	12.0843	12.9136	12.4566	25.3842	28.7129	8.97251	11.6705	10.1092	9.24927	8.94843	9.84852	9.13421	9.7794	10.8799	11.5419	1.34077	1.68657	1.44899	3.3431	1.73434	1.22702	1.41376	1.27376	2.33313	2.48771
Acadvl	21.4263	50.1752	35.0271	34.7953	27.1517	30.6594	26.4366	27.4757	29.7684	19.1399	22.4996	23.7768	20.3329	20.2778	18.5405	19.3617	18.5881	21.3001	16.1635	16.5177	0.9523	2.11026	1.72268	1.71593	1.46446	1.5835	1.42223	1.28993	1.8417	1.15875
Acap2	45.2878	50.9854	49.6394	24.7832	30.8992	31.0766	37.1546	28.2148	29.3177	28.8695	29.8908	37.3229	33.5576	32.5571	26.7591	28.8129	22.9442	28.546	21.1418	23.4946	1.51511	1.36606	1.47923	0.761222	1.15472	1.07857	1.61935	0.988399	1.38671	1.22877
Acat1	65.6381	52.0552	44.3494	2.78248	41.9774	32.7063	40.6448	36.9204	21.5732	24.9673	30.5667	33.2086	24.8573	25.207	19.9057	23.4523	18.7222	20.8287	15.3878	14.6637	2.14737	1.56752	1.78416	0.110385	2.10882	1.39459	2.17094	1.77257	1.40197	1.70265
Acbd3	49.819	37.206	18.7688	13.0512	43.16	52.9783	25.9264	29.0487	28.9111	39.408	10.6453	11.4215	9.76481	11.2178	14.5284	14.561	10.5992	12.1026	14.3671	15.0795	4.67989	3.25753	1.92208	1.16344	2.97074	3.63838	2.44608	2.4002	2.01232	2.61335
Acbd5	25.8194	32.6011	34.2811	36.1307	17.2552	16.9792	14.0306	17.7758	20.6072	19.8744	24.0605	29.0052	22.3735	23.8156	17.9357	21.2236	14.4761	17.046	11.6448	12.7297	1.07311	1.12398	1.53222	1.5171	0.96206	0.800017	0.969224	1.04282	1.76966	1.56126
Acbd6	35.5587	40.4816	45.5759	103.282	16.7956	27.4762	27.7097	52.0801	39.4899	27.2712	24.155	21.7868	19.1037	20.3139	18.499	15.3967	15.0459	18.8316	15.0343	15.5209	1.4721	1.85808	2.38571	5.0843	0.907918	1.78455	1.84168	2.76557	2.62666	1.75706
Acd	21.2448	18.714	9.98584	15.1158	2.45332	3.86254	3.23803	1.6175	4.39486	2.82572	10.775	7.63174	9.47063	7.99336	7.79837	7.00524	4.77533	5.60597	3.43271	3.07364	1.97168	2.45213	1.0544	1.89105	0.314594	0.551378	0.678074	0.288532	1.28029	0.91934
Acer3	166.328	110.7	128.811	173.077	98.2317	96.0128	85.1065	101.309	110.105	138.637	62.1044	64.1065	60.3261	66.753	44.8383	47.1113	58.5562	52.6192	63.0804	57.9124	2.6782	1.72681	2.13525	2.5928	2.1908	2.038	1.45342	1.92532	1.74547	2.3939
Acin1	18.7425	17.9749	16.1948	20.5154	15.5499	5.73259	23.7034	22.1109	17.8514	16.3828	9.39775	10.7926	8.47477	9.34688	7.54378	9.03866	11.3261	16.016	10.0375	13.4531	1.99436	1.66548	1.91094	2.1949	2.06129	0.634229	2.09281	1.38055	1.77847	1.21777
Acly	67.499	59.5584	48.4939	37.8247	40.1104	36.2906	48.9214	50.5557	47.0329	49.2145	39.8742	39.4704	36.4529	31.0151	32.4243	28.2679	36.8702	40.6406	32.6344	32.5928	1.6928	1.50894	1.33032	1.21956	1.23705	1.28381	1.32685	1.24397	1.4412	1.50998
Aco1	26.8644	20.8919	13.3331	28.035	13.9217	10.8303	15.132	15.3068	18.4843	9.53709	13.0982	13.7272	11.9829	10.98	10.4374	10.2921	9.23077	10.2186	8.30845	7.31247	2.05101	1.52194	1.11268	2.55328	1.33382	1.05229	1.6393	1.49793	2.22476	1.30422
Aco2	55.5901	84.9256	59.784	49.5741	50.4112	66.1033	47.9302	43.5154	35.8996	47.1676	50.6401	51.5407	51.8601	49.6587	45.0008	48.4879	47.2451	47.272	48.6506	42.7218	1.09775	1.64774	1.15279	0.998297	1.12023	1.3633	1.0145	0.920532	0.737906	1.10406
Acod1	27.0183	24.6812	207.225	310.383	1723.75	2246.12	4717.07	4783.38	5127.18	4911.84	7.51013	3.47115	122.629	156.558	781.671	831.207	2527.59	2651.05	3008.64	2776.81	3.59758	7.11038	1.68986	1.98254	2.20521	2.70223	1.86623	1.80433	1.70415	1.76888
Acot13	94.5316	86.3547	74.7609	67.2599	70.6966	83.07	39.1076	51.5806	13.037	34.4605	28.2374	29.7137	20.6404	22.9932	24.0586	19.8835	9.19849	13.6896	7.20488	9.4945	3.34775	2.90623	3.62206	2.92521	2.93851	4.17783	4.25152	3.76786	1.80947	3.62953
Acot7	68.9758	60.7592	53.0061	12.2692	75.1008	53.82	102.126	129.976	101.468	84.9474	19.0298	14.755	14.2238	12.714	19.4451	21.1078	25.9409	33.4188	26.5659	27.6285	3.62463	4.11786	3.72658	0.965019	3.8622	2.54977	3.93686	3.88932	3.81947	3.07463
Acox1	34.152	30.0453	34.3548	37.095	27.0823	33.0623	19.1801	25.6584	18.4068	24.4586	16.0302	17.9296	16.6352	15.2427	11.7974	12.348	10.9872	12.2779	9.88763	10.4049	2.13048	1.67574	2.06519	2.43362	2.29562	2.67754	1.74568	2.0898	1.8616	2.35068
Acox3	42.3018	32.9286	31.345	25.8077	24.9757	21.791	14.1472	12.4873	5.21982	16.0349	17.8223	20.4655	14.1561	14.6483	11.9668	13.0789	9.48354	9.25167	5.90406	5.58149	2.37352	1.60898	2.21424	1.76183	2.08709	1.66612	1.49176	1.34973	0.884108	2.87287
Acp1	44.5924	21.0681	37.706	34.9594	44.4653	25.5233	19.5626	28.8584	30.9769	16.5974	22.3647	21.0124	23.8404	14.7254	15.3356	14.2533	13.9334	13.0165	11.9835	9.53411	1.99388	1.00265	1.5816	2.37409	2.89948	1.79069	1.40401	2.21707	2.58496	1.74085
Acp2	171.422	167.318	126.714	124.946	92.0145	140.053	125.085	111.732	185.825	175.666	42.1204	45.4951	41.6213	40.7287	42.8805	45.443	49.3345	44.4341	79.0674	79.0303	4.06981	3.67773	3.04444	3.06777	2.14583	3.08196	2.53544	2.51457	2.3502	2.22277
Acsf3	9.32852	7.88395	6.76107	7.38796	6.47813	5.14866	3.61739	4.02469	5.20732	3.3481	2.58471	2.03458	1.96948	2.00901	1.50797	1.93474	2.0722	2.09178	2.18714	2.47405	3.60912	3.87497	3.43293	3.67741	4.29592	2.66117	1.74568	1.92405	2.38089	1.35329
Acsl1	29.0269	22.4974	21.8067	13.2225	67.6292	70.4502	117.775	111.747	160.537	143.422	15.1573	16.6422	27.7033	24.0675	46.8164	48.2645	88.6272	94.2597	116.474	111.877	1.91504	1.35183	0.787149	0.549391	1.44456	1.45967	1.32888	1.18552	1.3783	1.28196
Acsl3	19.4494	30.5636	24.6688	16.8816	10.7071	12.5238	2.93302	2.09781	2.53329	3.61957	11.7741	13.5868	11.2152	10.6578	5.75379	5.75193	1.4478	1.26757	0.89601	1.08353	1.65189	2.24951	2.19958	1.58396	1.86088	2.17732	2.02585	1.65499	2.8273	3.34054
Acsl4	64.6694	68.9426	88.9982	87.531	62.3372	90.9632	78.6926	80.9461	88.0654	92.8142	35.6825	40.1531	36.2141	37.6289	36.4985	36.9177	34.9755	37.3913	42.1263	42.6782	1.81235	1.71699	2.45755	2.32617	1.70794	2.46394	2.24994	2.16484	2.09051	2.17474
Acsl5	64.3795	49.4398	42.036	53.8531	68.8018	37.383	57.5308	54.7299	86.633	79.6284	109.498	119.833	118.58	111.617	119.239	133.44	127.248	130.535	166.732	169.098	0.587952	0.412573	0.354494	0.482483	0.577006	0.280149	0.452116	0.419275	0.519594	0.470901
Acta2	6.19449	13.3608	12.0471	8.32514	10.8095	5.85013	17.3241	12.4719	14.523	17.9837	3.13103	4.5535	4.11604	3.51302	2.74881	2.66464	4.13293	3.95749	6.34953	4.86863	1.97842	2.93417	2.92687	2.36979	3.93242	2.19546	4.19173	3.15146	2.28726	3.6938
Actb	10534.7	10290.8	9154.6	8478.91	7897.72	8681.38	10610.3	12010	14565.1	14346.8	6458.29	4974.42	5566.84	4546.35	5267.73	4666.94	7732.6	8101.16	10925	9496.6	1.63119	2.06875	1.64449	1.86499	1.49927	1.86019	1.37215	1.4825	1.3332	1.51073
Actg1	485.64	450.805	594.438	486.161	526.437	663.605	574.476	604.092	687.945	749.532	210.917	179.766	238.453	192.025	226.72	201.621	250.796	237.832	342.516	278.727	2.30252	2.50773	2.4929	2.53176	2.32197	3.29136	2.29061	2.53999	2.00851	2.68912
Actl6a	51.61	49.1663	46.2069	55.9993	39.5053	45.5088	41.8029	39.6869	18.5058	25.9327	28.0706	29.0843	26.4815	23.3804	24.2491	23.8984	20.4594	26.3343	15.5453	16.8589	1.83858	1.69048	1.74487	2.39514	1.62915	1.90426	2.04321	1.50704	1.19044	1.53822
Actn1	122.674	123.086	112.741	142.539	109.698	115.603	105.663	112.169	106.395	118.279	46.8943	48.2006	45.2813	39.9506	46.099	49.2357	52.6837	60.8793	49.6339	54.5605	2.61597	2.55362	2.48979	3.56787	2.37962	2.34795	2.00561	1.84248	2.1436	2.16786
Actn4	136.367	109.738	113.96	152.591	115.61	95.9112	79.0339	78.4862	55.399	80.823	44.7556	45.7825	41.1244	38.0561	38.1174	42.0203	35.2637	39.7379	29.0373	31.7232	3.04692	2.39695	2.77109	4.00962	3.033	2.2825	2.24123	1.9751	1.90786	2.54776
Actr10	55.5664	81.3748	52.7397	70.7981	73.19	61.7507	73.7212	62.6275	45.3769	65.5665	39.7625	41.1463	36.6288	34.3679	36.1552	36.2568	39.9379	40.9741	40.0268	38.8337	1.39746	1.97769	1.43984	2.06001	2.02433	1.70315	1.8459	1.52847	1.13366	1.68839
Actr1a	134.243	96.3304	76.8838	51.7885	112.557	81.2724	65.5706	96.2807	69.7604	75.7984	53.1473	56.1681	50.6567	47.6582	48.8461	47.8864	49.6899	58.6522	65.7013	60.5659	2.52586	1.71504	1.51774	1.08666	2.30431	1.69719	1.3196	1.64155	1.06178	1.2515
Actr1b	40.1345	36.0759	42.1281	38.1875	50.8445	71.1133	20.4908	23.7343	21.0904	6.60628	32.9426	30.7692	38.3136	36.5261	41.2463	45.3749	28.6052	34.2996	20.1909	20.4231	1.21832	1.17247	1.09956	1.04549	1.2327	1.56724	0.716332	0.691971	1.04455	0.323471
Actr2	608.2	594.245	553.111	457.793	474.562	493.376	605.865	649.465	636.492	690.342	186.964	192.401	199.951	173.358	188.359	172.622	229.198	255.613	293.699	303.052	3.25303	3.08858	2.76623	2.64074	2.51945	2.85813	2.64341	2.54081	2.16716	2.27797
Actr3	281.916	237.816	230.17	318.977	233.872	262.076	305.913	370.93	408.536	436.536	244.588	236.938	270.142	226.049	234.19	220.906	314.984	298.326	442.908	390.425	1.15261	1.0037	0.852036	1.4111	0.998644	1.18637	0.971203	1.24337	0.922394	1.1181
Actr6	21.0144	10.9267	6.99659	7.44674	4.05174	1.01486	2.43078	4.67487	4.6189	4.94961	7.08634	6.68399	3.72407	4.45499	2.75383	2.54239	2.70492	3.02725	2.00806	1.65521	2.96548	1.63475	1.87875	1.67155	1.47131	0.399175	0.898652	1.54427	2.30018	2.99033
Actr8	5.82092	8.99349	8.85959	15.716	5.83024	5.14035	9.84969	4.30521	3.89919	15.0421	11.8763	12.6956	9.47424	8.62302	6.39301	6.53933	6.82969	7.02775	5.92591	6.52447	0.490128	0.708393	0.935124	1.82256	0.911972	0.786068	1.44219	0.612601	0.657991	2.30549
Acvr1	32.5875	21.7451	26.737	35.4134	18.5638	20.0655	38.6371	42.1786	28.6506	28.1435	8.61879	9.06939	7.77001	7.53351	7.62576	6.40665	17.4353	15.5976	11.1099	12.2336	3.78098	2.39764	3.44105	4.70078	2.43436	3.13199	2.21602	2.70417	2.57882	2.30051
Acvr1b	20.5295	23.911	11.3268	25.2197	8.34832	5.55208	14.8181	10.9608	72.1972	44.3568	11.891	13.2881	8.57278	7.42774	6.61041	8.56886	9.24558	8.54783	29.8714	27.6249	1.72648	1.79943	1.32125	3.39534	1.2629	0.647936	1.60272	1.28229	2.41693	1.60568
Acvr2a	4.04678	4.76945	17.323	24.4742	8.22812	14.8529	10.4854	9.16618	10.6737	6.1002	4.60228	5.11641	12.8826	12.6807	9.14153	10.6487	7.75689	7.19615	6.13471	6.78622	0.879299	0.932186	1.34468	1.93004	0.900081	1.39482	1.35176	1.27376	1.73988	0.89891
Acvrl1	32.012	25.2002	29.8625	16.7841	16.5074	16.3574	12.4226	21.3851	58.105	86.6525	9.72291	9.42653	7.55958	8.80676	5.77378	7.49598	7.09758	6.73094	25.823	25.8179	3.29243	2.67333	3.95029	1.90582	2.85903	2.18216	1.75026	3.17714	2.25012	3.3563
Adam10	183.273	149.686	135.255	108.431	102.992	107.617	78.6109	75.3344	51.1723	61.1032	57.4338	57.8084	53.4396	51.3709	44.83	48.7611	37.584	36.9903	30.1296	31.8448	3.19103	2.58935	2.53098	2.11074	2.29738	2.20701	2.09161	2.0366	1.6984	1.91878
Adam15	151.462	148.202	112.353	118.6	125.912	140.688	86.7515	82.1305	79.2441	79.15	162.125	130.834	138.644	151.113	119.675	126.895	99.4389	105.028	98.4291	85.1798	0.934232	1.13275	0.810366	0.784842	1.05211	1.10869	0.87241	0.781988	0.805088	0.929211
Adam17	257.057	232.074	224.145	260.661	284.903	274.603	325.109	309.6	366.978	428.48	109.712	130.482	144.706	152.35	181.376	188.661	246.885	240.913	270.953	259.086	2.34302	1.7786	1.54897	1.71093	1.57079	1.45554	1.31684	1.28512	1.3544	1.65382
Adam8	1620.2	1387.04	1320	1177.45	996.392	1067.93	417.262	429.888	471.129	501.697	743.434	725.675	688.937	642.462	539.737	566.409	309.644	315.915	358.165	326.259	2.17935	1.91138	1.916	1.83272	1.84607	1.88545	1.34756	1.36077	1.3154	1.53773
Adam9	118.635	101.703	110.677	124.057	110.284	95.3917	123.491	111.072	141.894	157.198	83.4591	91.366	88.6363	88.7295	82.1933	84.1259	108.364	100.446	125.171	122.861	1.42148	1.11314	1.24866	1.39815	1.34177	1.13392	1.1396	1.10579	1.1336	1.27947
Adap1	24.3499	21.2223	17.4717	6.31129	11.7067	8.60119	10.5582	17.5592	17.9421	22.7225	27.9684	27.4833	25.8238	26.5648	22.8531	23.2308	30.9002	40.5886	30.9728	29.5273	0.870621	0.772186	0.676574	0.237581	0.512256	0.370249	0.341689	0.432614	0.579285	0.769541
Adap2	26.6294	32.5683	15.0691	20.6474	3.44685	11.6072	79.3607	71.1432	57.6302	83.0282	35.9734	41.2638	26.6824	24.8368	19.7704	23.3506	120.867	130.067	127.998	137.986	0.740253	0.78927	0.564758	0.831322	0.174344	0.497086	0.656593	0.546975	0.450242	0.601715
Adar	19.4904	29.0323	12.9254	32.626	21.7081	17.4268	113.988	126.314	83.5573	102.411	20.6783	21.5912	15.072	15.3629	22.7404	21.8959	107.833	119.851	90.9267	95.5346	0.942553	1.34464	0.857579	2.12369	0.954605	0.795894	1.05708	1.05393	0.918952	1.07198
Adat2	4.0896	6.8046	15.5612	3.09164	9.17538	11.5868	6.05509	7.05766	15.9801	0.684973	3.74963	2.51482	3.09222	2.55416	2.04161	3.5184	2.57071	3.37854	2.61409	2.38299	1.09067	2.7058	5.03237	1.21043	4.4942	3.29319	2.35541	2.08897	6.11309	0.287442
Adck1	12.8411	13.1483	10.1481	8.58746	10.8038	3.81626	6.03284	7.9906	11.5792	5.95598	7.41946	6.50351	5.90711	6.47762	4.2408	2.90795	6.10292	7.14842	6.70638	5.82266	1.73073	2.02172	1.71795	1.32571	2.54758	1.31236	0.988517	1.11781	1.7266	1.0229
Adck2	5.45206	8.14115	1.91497	11.4138	5.17515	2.26843	2.79428	3.25694	1.96652	3.37172	3.28325	4.37533	2.63776	2.79091	1.71681	1.38687	2.51833	2.39064	2.71698	2.54038	1.66057	1.8607	0.725981	4.08962	3.0144	1.63564	1.10958	1.36237	0.72379	1.32725
Adck5	12.0562	11.6398	12.2332	6.41369	2.50454	2.76023	3.80148	5.20151	1.04688	7.17975	5.57421	5.73781	5.70895	5.10634	2.22914	4.50185	2.74775	3.25358	3.28619	2.7229	2.16285	2.0286	2.14281	1.25602	1.12355	0.613133	1.38349	1.5987	0.318569	2.6368
Adcy3	9.29063	5.52986	3.44892	5.13914	8.76987	4.20225	1.84528	1.75976	0.531266	1.48019	2.97261	3.35866	3.0607	3.05984	2.44346	2.33941	1.41691	1.46017	1.16267	0.939628	3.12541	1.64645	1.12684	1.67955	3.58912	1.79629	1.30233	1.20517	0.456938	1.5753
Adcy7	47.9541	55.5515	37.9319	55.0033	35.9072	45.268	24.2208	16.2049	18.2766	18.873	57.3295	60.8302	63.1569	62.7739	55.3087	55.9969	35.4387	37.13	29.8607	27.2928	0.836464	0.913222	0.600597	0.876212	0.649215	0.808401	0.683457	0.436437	0.612061	0.6915
Adcy9	10.8831	5.26551	11.2779	5.25153	4.67565	6.79907	0.428554	0.449561	0.542885	1.51256	9.11286	9.41253	8.80991	9.76924	4.46205	4.83717	0.769912	0.895261	0.504039	0.555397	1.19426	0.559415	1.28014	0.537558	1.04787	1.40559	0.556628	0.502156	1.07707	2.72339
Add1	49.6945	36.6732	45.3193	54.9547	47.2237	50.458	26.1475	32.6918	34.6638	23.3193	29.5452	30.4367	26.932	26.9593	22.7172	21.697	18.6897	23.9199	19.9657	21.4212	1.68198	1.2049	1.68273	2.03844	2.07877	2.32558	1.39904	1.36672	1.73617	1.08861
Adgre1	1206.68	1101.97	1042.91	1309.71	891.48	1225.96	1089.59	986.343	1231.42	1338.09	645.786	743.179	633.994	668.643	617.772	712.125	874.378	726.889	1066.03	931.929	1.86855	1.48278	1.64498	1.95876	1.44306	1.72155	1.24613	1.35694	1.15515	1.43583
Adgre5	82.763	60.4716	79.962	36.7241	56.3113	62.0045	24.1083	21.8901	21.9348	26.7599	23.374	20.8534	21.9273	21.5283	18.5028	16.8624	10.0894	11.1834	9.60449	9.04049	3.54082	2.89985	3.64669	1.70585	3.0434	3.67708	2.38946	1.95737	2.2838	2.96
Adgrl2	13.5878	8.88876	11.2685	3.81909	23.0594	27.5941	29.1455	30.777	8.57677	14.4428	8.25632	8.56608	10.1662	9.67928	28.8898	30.7985	35.3147	33.8052	10.6626	10.7786	1.64574	1.03767	1.10842	0.394564	0.798187	0.895958	0.825308	0.910423	0.804381	1.33995
Adh5	78.4741	108.232	61.3053	43.5747	66.2185	72.9787	52.6964	66.0657	53.7295	34.5459	51.4282	52.4823	43.8215	39.9776	34.4608	38.1443	37.2549	40.137	30.5932	29.7566	1.5259	2.06225	1.39898	1.08998	1.92156	1.91323	1.41448	1.646	1.75625	1.16095
Adi1	50.7556	47.4534	25.3826	20.8294	18.708	33.616	5.90456	7.50787	6.79981	1.45733	8.89813	8.85597	5.5323	5.71527	4.34368	2.45624	1.43931	1.36574	0.676421	0.64849	5.70407	5.35836	4.58807	3.64453	4.30694	13.686	4.10235	5.49729	10.0526	2.24728
Adipor1	89.1848	77.839	44.7211	48.0836	34.9001	45.9419	18.4252	20.5812	21.0715	23.6224	175.244	160.657	176.356	151.334	125.768	121.003	58.0512	64.5968	49.6977	46.7399	0.508918	0.484504	0.253585	0.317733	0.277496	0.379676	0.317396	0.318609	0.423994	0.5054
Adipor2	63.7957	43.5766	37.3063	39.5978	38.0427	26.9824	16.157	18.6873	11.0209	18.896	49.233	47.8448	46.3215	42.6493	33.9935	32.8769	20.6952	19.2062	18.272	18.0999	1.29579	0.910791	0.805379	0.92845	1.11912	0.820709	0.780713	0.972982	0.603158	1.04398
Adk	93.5976	66.5641	51.6985	58.7744	39.3739	31.4953	34.3659	33.7057	30.0845	11.3783	21.0017	23.1921	19.7681	16.2885	17.5598	18.7512	15.845	16.3128	10.1321	10.648	4.45667	2.87013	2.61524	3.60835	2.24228	1.67965	2.16887	2.06621	2.96921	1.06859
Adnp	11.4043	16.1356	10.45	2.63921	9.26862	12.7686	13.0086	11.7484	12.0046	12.7472	16.5708	17.4705	13.5105	12.1199	15.0349	12.7086	10.6838	12.5401	11.0612	12.1015	0.688218	0.92359	0.773477	0.217758	0.616476	1.00472	1.2176	0.936865	1.08529	1.05336
Adnp2	7.74706	2.57803	7.91696	7.36257	1.73812	5.64407	4.91586	3.15139	3.6326	5.56099	7.65723	6.67415	7.73672	7.53651	3.88958	2.90999	3.58093	4.00461	4.38218	4.3642	1.01173	0.386271	1.0233	0.976921	0.446866	1.93955	1.37279	0.786941	0.828948	1.27423
Ado	20.1548	24.0334	34.5106	75.4208	32.2185	28.0324	3.73015	7.826	4.72529	9.11452	26.1197	16.1546	19.7419	24.3506	26.7639	28.9356	3.05061	5.49464	2.82033	2.99065	0.771629	1.48771	1.74808	3.09728	1.2038	0.968784	1.22276	1.4243	1.67544	3.04767
Adora2b	6.2208	2.15639	31.9553	19.9868	43.1792	96.7369	50.9459	41.7682	122.147	182.859	3.29057	3.31421	18.2802	20.4476	47.7477	55.1917	40.4415	35.3833	114.576	104.636	1.89049	0.650648	1.74808	0.977467	0.90432	1.75274	1.25974	1.18045	1.06608	1.74758
Adpgk	70.9785	39.9454	42.4975	50.5017	24.0041	19.357	32.0682	26.0069	14.6832	16.259	26.5576	22.6091	23.2466	19.3886	19.3844	19.658	13.0535	11.3825	7.84412	7.78661	2.67263	1.76678	1.82812	2.60471	1.23832	0.984689	2.45667	2.28481	1.87187	2.08807
Adprh	72.7972	60.9586	76.0387	127.331	93.2724	86.0297	76.0827	81.752	112.109	124.798	35.3358	30.9633	28.2575	28.6811	31.4962	34.2505	36.0555	38.1711	44.4978	42.7958	2.06015	1.96874	2.69092	4.43955	2.96139	2.51178	2.11015	2.14173	2.51943	2.91613
Adra1a	9.41253	2.45667	8.42713	25.5326	13.6645	12.407	0.614834	0.358318	1.2981	3.61672	6.38468	6.76251	6.56514	6.58213	8.07107	8.66352	1.18151	1.09778	3.58696	2.90363	1.47424	0.363279	1.28362	3.87909	1.69302	1.43209	0.520382	0.326401	0.361895	1.24558
Adrbk1	74.4224	75.0102	72.4486	59.1175	31.9961	31.818	32.0223	30.3159	51.3708	45.7476	98.4367	84.0152	82.5775	76.1523	66.4228	65.6019	46.7192	57.6936	62.2032	62.4145	0.756043	0.892817	0.877341	0.776306	0.481703	0.485017	0.68542	0.525463	0.825854	0.732963
Adrm1	17.8566	16.2704	24.2662	9.64226	25.7547	8.3772	17.7044	23.1121	11.9614	14.7405	17.744	11.0752	17.5566	12.1962	17.4466	12.3449	14.4	12.9605	16.1625	11.2259	1.00635	1.46908	1.38217	0.790598	1.4762	0.678598	1.22947	1.78327	0.740071	1.31307
Adsl	69.8273	38.1322	34.3363	34.9212	24.1021	46.4847	33.7995	34.0658	25.1862	23.211	25.6279	27.6085	22.8175	18.8093	18.663	23.9142	17.3796	19.9151	15.1996	12.3811	2.72466	1.38118	1.50482	1.85659	1.29144	1.94381	1.94478	1.71055	1.65703	1.87471
Adss	116.368	105.67	112.433	63.8225	123.502	155.151	82.5581	88.2292	28.085	18.6308	71.3307	76.8199	91.8111	86.0192	91.639	95.9738	52.5968	61.6395	21.8477	21.1723	1.63139	1.37555	1.22462	0.741956	1.3477	1.6166	1.56964	1.43138	1.28549	0.879957
Adssl1	80.2532	108.593	81.4316	70.9963	60.0183	92.3575	42.7679	45.6747	33.3606	29.4574	44.7391	42.2897	37.4414	32.8754	29.8916	30.8035	21.2125	28.8896	13.7759	14.2071	1.7938	2.56783	2.17491	2.15955	2.00786	2.99827	2.01616	1.58101	2.42167	2.07342
Aebp2	21.4124	19.6966	29.0132	46.1929	53.0204	46.8111	52.1944	50.0212	25.7129	31.2278	12.7076	11.8604	15.939	16.5674	35.197	33.8245	32.1375	42.5839	14.7244	17.3884	1.685	1.6607	1.82027	2.78819	1.50639	1.38394	1.6241	1.17465	1.74628	1.7959
Aes	226.16	175.608	128.577	26.1486	85.8119	108.964	53.6751	44.7694	65.4994	41.445	256.853	192.276	195.191	192.275	163.909	167.281	74.7348	104.387	62.8122	67.9824	0.880503	0.913313	0.658722	0.135996	0.523534	0.65138	0.718207	0.428879	1.04278	0.609643
Afdn	13.6727	8.76811	7.47867	6.46015	2.63621	4.84223	5.37728	3.04164	1.33565	5.15263	7.60904	9.13256	8.3704	8.71413	6.54127	6.86941	4.63657	5.22412	3.73501	4.02404	1.7969	0.960093	0.893466	0.741342	0.403012	0.704898	1.15975	0.58223	0.357604	1.28046
Aff1	10.9876	13.5943	13.1858	13.2582	6.28142	8.81663	63.5871	65.0904	47.0624	48.2024	6.505	6.58634	7.36384	7.76788	6.77213	7.87365	32.4226	41.0672	24.4976	31.7229	1.6891	2.06402	1.79061	1.7068	0.927541	1.11976	1.96119	1.58497	1.9211	1.51948
Aff4	7.14853	12.3899	17.6804	5.06636	6.64088	11.3925	7.11123	10.409	6.80865	8.53088	12.8092	14.7507	17.6204	19.8454	15.0777	16.6665	10.443	12.9222	8.50967	11.4065	0.558079	0.83995	1.0034	0.255291	0.440445	0.68356	0.680953	0.805515	0.800108	0.747899
Afg3l1	20.0634	25.539	17.2709	20.6377	12.5449	16.0112	15.5835	10.4299	13.8803	8.7592	16.5977	17.3033	16.4477	15.3852	15.4345	15.1742	11.6379	14.2653	11.4041	11.205	1.20881	1.47596	1.05005	1.3414	0.81278	1.05516	1.33903	0.731139	1.21714	0.781719
Afg3l2	18.4417	26.737	22.8982	9.78352	11.0698	11.4999	16.4069	14.8661	11.3781	12.6805	11.1926	11.505	11.1086	10.0964	8.98033	10.4642	8.52572	9.78262	9.13865	9.48324	1.64768	2.32394	2.06131	0.969015	1.23267	1.09898	1.9244	1.51964	1.24505	1.33714
Aftph	24.7095	21.0957	24.7202	17.4205	11.0564	22.3109	53.0277	49.9493	37.7531	45.3389	31.134	31.967	32.8628	28.5208	30.8802	32.1113	62.9926	65.9461	61.2542	61.0725	0.79365	0.659923	0.752225	0.610799	0.358043	0.694798	0.841808	0.757426	0.616335	0.742377
Aga	67.6036	66.6573	65.1665	55.0817	50.1369	35.9856	38.6475	40.8336	40.5048	32.0819	26.4623	28.9089	24.3964	23.1007	21.3744	25.5061	20.8004	20.2547	22.6184	18.7801	2.55472	2.30577	2.67115	2.38442	2.34566	1.41086	1.85802	2.01601	1.79079	1.70829
Agap3	12.8252	10.5908	12.5798	5.81735	5.59505	4.18424	2.42639	4.05776	0.668197	2.57774	22.3422	18.3477	18.1018	19.4818	13.7727	12.9878	4.34211	6.13115	3.98819	3.51067	0.574036	0.577225	0.694946	0.298604	0.406242	0.322166	0.558803	0.661828	0.167544	0.734258
Agfg1	42.5646	27.8997	35.337	77.5194	33.0985	61.2942	40.9997	53.214	55.5665	54.9273	28.0927	26.1538	34.5113	31.1568	41.2425	42.6794	39.7019	45.3614	53.596	56.8472	1.51515	1.06676	1.02393	2.48804	0.802535	1.43615	1.03269	1.17311	1.03677	0.966227
Aggf1	11.3077	9.50845	6.66216	23.7148	7.9792	6.76445	7.69602	6.37363	2.56557	6.41495	18.2527	20.6515	18.0903	16.7089	17.7362	20.1823	18.7897	23.0888	13.5358	15.3478	0.619506	0.460425	0.368273	1.41929	0.449881	0.335167	0.409588	0.276048	0.18954	0.417971
Agl	9.82473	10.8981	6.96111	8.96394	5.79569	2.61777	3.32313	4.27531	1.19142	4.51109	6.73807	7.48904	6.54956	5.72381	4.39731	4.68621	2.62275	3.34175	2.30013	2.69255	1.45809	1.45521	1.06284	1.56608	1.31801	0.558612	1.26704	1.27936	0.517979	1.6754
Ago1	13.9665	7.33848	6.15345	0.277851	2.67997	4.54395	7.89061	6.18426	6.03188	6.27908	11.276	12.2747	11.0656	10.9233	11.9264	11.2648	9.11976	9.67379	9.3338	9.56265	1.2386	0.597853	0.556088	0.0254366	0.22471	0.403377	0.865222	0.63928	0.646241	0.656626
Ago2	12.0724	14.3957	12.6325	2.50977	19.4677	6.29661	8.71379	7.03148	3.53797	2.42643	19.86	17.7976	20.9118	17.9786	20.4609	18.8412	11.4279	13.2695	8.32154	8.61321	0.607875	0.808853	0.604084	0.139598	0.951459	0.334193	0.7625	0.529896	0.425158	0.28171
Agpat1	22.7602	27.2665	35.3344	61.9421	15.83	19.6971	17.8604	26.513	17.0756	31.107	38.9109	27.2775	28.1608	28.116	28.5421	32.0152	24.3519	25.1356	26.2342	26.6849	0.584929	0.999594	1.25474	2.20309	0.554618	0.615242	0.733427	1.0548	0.65089	1.16572
Agpat3	42.0973	45.931	34.6626	7.82572	43.7408	16.5309	17.8814	17.4181	38.8318	26.3543	29.2038	27.482	25.1182	23.2302	21.567	23.2668	20.8912	24.5953	24.4647	23.3984	1.4415	1.67131	1.37998	0.336877	2.02813	0.710493	0.855929	0.708187	1.58726	1.12633
Agpat4	31.5764	31.5997	25.0748	25.9467	66.6091	54.6325	32.2691	39.5372	30.578	25.869	8.85971	9.86875	14.5801	12.8172	25.9755	25.9664	22.7217	20.3132	19.069	17.4971	3.56404	3.202	1.7198	2.02437	2.5643	2.10397	1.42019	1.94638	1.60355	1.47847
Agpat5	113.06	75.7207	101.733	112.349	113.27	145.602	68.1699	77.7698	78.3542	56.0953	56.0434	53.602	52.0547	51.2706	44.4435	52.7065	36.9462	38.3478	31.4724	32.5207	2.01737	1.41265	1.95435	2.19129	2.54863	2.76252	1.84511	2.02801	2.48962	1.72491
Agps	38.3947	29.8986	36.5973	39.8734	16.3147	18.2799	19.2362	24.8474	10.9111	22.6051	36.1465	38.6099	31.7901	29.0409	23.4655	23.1474	16.7442	19.1851	18.0095	18.62	1.06219	0.774375	1.15122	1.37301	0.695266	0.789719	1.14883	1.29514	0.605851	1.21402
Agrn	7.64525	6.00703	4.46057	6.83923	8.71933	4.62752	18.2057	15.9975	20.0155	22.345	2.91172	2.68298	3.12684	3.83634	4.97437	5.94023	14.9675	14.2804	15.6578	14.4213	2.62568	2.23894	1.42654	1.78275	1.75285	0.779013	1.21635	1.12025	1.27831	1.54944
Agtpbp1	3.28908	6.56716	6.25759	9.19994	2.95174	2.54147	2.80016	7.66282	7.71127	1.32214	15.7278	17.8892	16.9903	15.2152	13.1686	13.609	8.84675	9.84715	9.59714	10.3493	0.209125	0.367103	0.368304	0.604653	0.224149	0.186749	0.316518	0.778176	0.803497	0.127752
Agtrap	30.7234	40.3578	34.456	108.796	57.1398	76.2174	79.606	95.2286	147.853	151.939	18.9886	14.8124	16.0057	14.8352	17.9209	23.0846	38.2775	37.5111	68.9721	66.7888	1.61799	2.72459	2.15273	7.33363	3.18845	3.30165	2.07971	2.53868	2.14367	2.27492
Ahctf1	4.38774	6.72429	6.94187	2.706	5.1812	7.76222	5.68444	7.09891	3.24855	3.88728	9.18608	10.1952	10.1911	9.03425	13.4424	13.4481	7.86178	9.02584	4.64983	4.98513	0.477651	0.659555	0.681172	0.299526	0.385437	0.5772	0.723048	0.78651	0.698639	0.779775
Ahcy	13.2228	16.0009	18.7533	12.7224	19.2159	6.50189	12.2361	10.1131	9.86395	8.45617	12.9714	11.1261	10.5351	8.07711	8.76144	7.51396	10.2904	9.11637	7.38259	6.08409	1.01938	1.43813	1.78008	1.57511	2.19323	0.865308	1.18909	1.10934	1.33611	1.38988
Ahcyl1	32.9222	43.3323	41.1338	60.178	38.5856	54.295	45.289	41.6578	42.6252	41.2329	10.6047	10.3777	10.6395	9.71464	11.7255	9.11543	10.0223	13.2499	9.09161	11.1866	3.10448	4.17551	3.86613	6.19457	3.29073	5.95639	4.51884	3.14401	4.68841	3.68593
Ahcyl2	35.9027	30.7223	29.6644	35.6719	13.2334	24.5715	33.2236	38.1714	25.2522	29.122	24.5258	24.0136	21.4706	20.2139	17.4624	20.4772	19.4207	21.813	18.1024	17.6398	1.46388	1.27937	1.38163	1.76472	0.757819	1.19994	1.71074	1.74994	1.39497	1.65092
Ahnak	77.6352	89.0482	96.25	86.279	114.996	142.825	88.5544	69.6139	56.3993	56.4083	95.6957	121.489	125.201	139.294	144.479	164.197	119.882	98.4362	79.8916	82.3684	0.811272	0.73297	0.768764	0.6194	0.79594	0.869836	0.738679	0.707198	0.705948	0.68483
Ahsa1	249.954	223.516	213.63	104.073	160.473	158.671	120.135	141.353	111.794	105.5	211.709	222.019	183.418	177.244	143.211	160.475	118.279	155.995	109.654	117.748	1.18065	1.00674	1.16472	0.587175	1.12054	0.988757	1.01569	0.906139	1.01951	0.895986
Aif1	193.678	154.722	178.492	248.504	138.532	140.044	126.28	129.94	116.644	174.101	71.4319	80.479	59.3591	61.3036	50.2066	53.5994	46.911	56.368	67.594	64.217	2.71136	1.92252	3.00699	4.05367	2.75925	2.61278	2.6919	2.30521	1.72566	2.71114
Aifm1	19.5357	24.0255	20.6844	9.63166	18.5801	19.0331	8.33157	8.52009	13.9396	8.53582	7.32343	8.56406	7.57541	6.64015	5.59714	4.89827	4.80525	5.51533	3.63173	3.88462	2.66757	2.80538	2.73047	1.45052	3.31958	3.88568	1.73385	1.5448	3.83828	2.19734
Aig1	24.0178	20.5868	21.6011	37.139	4.89872	12.6535	25.4583	19.7824	25.5953	34.0106	11.0876	10.3477	9.00509	9.38107	7.52107	11.2708	18.8538	18.074	24.2731	23.1673	2.16619	1.9895	2.39876	3.95893	0.651333	1.12268	1.3503	1.09452	1.05447	1.46805
Aim1	16.5203	13.8287	13.7362	6.70703	6.17745	8.03734	35.5576	35.0435	44.8285	38.2769	12.7034	14.6252	12.3336	11.138	11.4545	13.4109	30.797	35.8181	40.0195	44.0832	1.30047	0.945539	1.11373	0.602173	0.539304	0.599313	1.15458	0.978375	1.12017	0.868287
Aimp1	61.0212	55.9553	60.6789	35.6743	54.3062	55.3237	47.2823	53.1804	36.243	23.3028	28.3185	32.9692	24.5796	22.078	21.8521	24.346	21.3996	24.9234	18.8489	21.1025	2.15482	1.6972	2.46866	1.61583	2.48517	2.27239	2.2095	2.13376	1.92282	1.10426
Aimp2	45.2765	53.8104	41.8395	57.4541	30.8373	38.1087	17.0584	20.9294	20.8511	3.25004	16.4226	14.7096	15.6723	12.6413	12.593	12.4553	8.86721	11.0209	6.36923	6.01493	2.75697	3.65819	2.66965	4.54496	2.44876	3.05965	1.92377	1.89906	3.27372	0.540328
Aip	46.3447	57.9428	53.8	42.7552	34.3657	43.0939	38.0889	53.3762	44.1988	43.8111	26.7583	24.2348	24.2973	24.0049	21.4891	20.7172	21.7126	23.5171	26.3397	23.8222	1.73197	2.3909	2.21424	1.7811	1.59921	2.0801	1.75423	2.26968	1.67803	1.83909
Ak2	82.6203	71.1468	97.6219	222.716	134.756	80.6407	55.9329	72.4638	40.7797	45.3383	37.1476	38.2426	38.5585	40.948	48.4093	58.1329	39.3288	50.0058	30.1429	31.4223	2.22411	1.86041	2.53179	5.43899	2.78368	1.38718	1.42219	1.44911	1.35288	1.44287
Ak3	40.0188	36.7811	29.5847	12.9657	2.56531	36.2234	19.8918	19.9789	13.4035	9.76694	21.6523	23.7844	18.9806	19.6503	17.2383	17.2454	13.3344	17.0026	10.7259	12.4109	1.84825	1.54643	1.55868	0.659822	0.148814	2.10047	1.49176	1.17505	1.24964	0.786967
Ak6	33.277	71.3085	57.5551	128.07	85.6892	44.4135	31.9136	36.2188	24.824	15.9608	27.6836	26.8457	28.6965	22.6726	24.3147	27.6938	22.1439	22.3428	19.6768	20.0463	1.20205	2.65623	2.00565	5.64869	3.52418	1.60373	1.44119	1.62105	1.26159	0.796197
Akap1	11.4688	15.2326	10.3357	14.6023	7.61779	6.76302	4.13347	3.32042	2.83038	0.454955	6.54549	7.79486	5.35242	5.83036	4.88168	5.11196	2.93561	2.63296	1.42342	0.920215	1.75216	1.95419	1.93102	2.50453	1.56048	1.32298	1.40804	1.2611	1.98843	0.494401
Akap10	16.8626	16.0949	17.3092	45.6547	3.95924	8.18144	6.09656	4.56814	5.51644	6.3055	27.0495	32.7295	23.3303	22.4482	8.80967	9.71023	6.40268	7.36706	10.0402	10.1871	0.623398	0.491755	0.741918	2.03378	0.44942	0.842558	0.952189	0.620077	0.549436	0.618968
Akap11	6.94742	7.78199	10.0558	8.44454	5.73057	11.0523	3.98345	1.93949	0.638755	1.30053	9.88628	11.5687	10.6045	10.1478	8.65031	7.97673	4.07643	3.59898	2.17452	2.26502	0.702734	0.672678	0.948262	0.832151	0.66247	1.38557	0.977191	0.538899	0.293746	0.574182
Akap13	6.33859	8.99566	8.29968	2.60732	10.2999	10.1558	25.7396	23.5266	13.3311	10.5854	9.36834	10.9759	11.2161	11.3283	15.1237	17.1642	27.6164	31.9641	15.3	17.5414	0.676597	0.819585	0.739978	0.23016	0.681044	0.591681	0.932039	0.736031	0.871313	0.603448
Akap8	20.0125	19.2669	23.563	37.1088	28.8036	15.4636	7.40764	3.42109	5.31162	5.5022	15.7789	17.3905	15.5341	15.345	9.5382	10.2329	4.49724	5.85825	4.14877	4.97353	1.2683	1.1079	1.51686	2.4183	3.01982	1.51116	1.64715	0.583977	1.28029	1.1063
Akap8l	7.28802	15.2702	15.4063	7.65218	9.31116	2.50286	1.49871	1.8342	0.949266	0.813787	5.14012	7.05727	5.17663	6.30442	4.16385	4.86584	1.62754	1.88653	1.57383	1.58017	1.41787	2.16376	2.97613	1.21378	2.23619	0.514373	0.920841	0.97226	0.603158	0.515001
Akap9	3.56033	4.1012	4.27261	1.294	2.72665	3.59754	4.20702	3.94356	3.69204	2.0298	3.81003	5.60551	4.15806	4.51652	3.35652	4.25219	4.37636	4.85653	3.30366	4.08609	0.934464	0.731638	1.02755	0.286505	0.812342	0.846044	0.961306	0.812012	1.11756	0.496758
Akirin1	55.7928	42.2652	45.5658	51.4367	30.5308	66.2437	67.4961	44.0327	73.3793	75.8981	41.6052	32.2023	36.3398	32.6182	41.7113	41.3781	36.6019	39.0546	50.8497	46.027	1.34101	1.31249	1.25388	1.57693	0.731954	1.60094	1.84406	1.12747	1.44306	1.64899
Akna	3.50412	6.34187	5.61406	7.52883	22.4475	41.3269	12.0148	11.0999	15.5661	14.5492	7.49224	6.55822	10.1544	10.736	33.6238	32.16	13.3259	17.7713	21.4968	23.1974	0.4677	0.96701	0.552869	0.701272	0.667607	1.28504	0.901614	0.624595	0.724112	0.627189
Akr1a1	359.69	393.667	329.083	254.998	197.714	187.141	308.293	340.371	470.372	420.109	623.048	550.063	499.845	467.158	485.462	447.802	504.679	587.843	558.798	556.99	0.577308	0.715677	0.65837	0.54585	0.40727	0.41791	0.610869	0.579018	0.841756	0.754249
Akr1b10	55.2096	57.5852	56.4384	42.3601	13.4036	30.5626	27.1462	22.3975	19.3193	25.2571	29.8141	26.1571	22.3452	20.5503	16.7838	17.6125	15.8665	16.0112	13.3673	15.5101	1.8518	2.20151	2.52575	2.06129	0.798601	1.73528	1.71091	1.39886	1.44527	1.62843
Akr1b3	64.2739	66.7257	65.8448	113.999	63.7826	64.3089	40.8718	51.1944	40.5705	35.6084	51.2593	42.7739	49.7882	33.8069	41.0546	32.8988	54.0606	40.1915	47.4474	31.1878	1.2539	1.55996	1.3225	3.37206	1.5536	1.95475	0.756037	1.27376	0.855062	1.14174
Akr1b8	70.8661	61.2414	61.4551	61.6714	31.8913	22.922	25.9262	31.9965	23.1831	8.69507	30.4243	29.774	25.7437	20.5503	18.347	19.9387	12.9631	14.7042	7.64455	8.5758	2.32926	2.05687	2.38719	3.001	1.73823	1.14962	2	2.17601	3.03264	1.01391
Akr1c13	22.5439	13.8431	7.35267	7.91268	25.2896	7.46556	9.83478	8.85791	24.5395	12.1369	13.5433	12.7532	13.1995	10.3518	9.24465	11.2345	7.67154	8.06161	6.67652	6.70996	1.66458	1.08546	0.557042	0.764377	2.7356	0.664523	1.28198	1.09878	3.67549	1.80878
Akr1e1	44.143	52.3261	31.6173	1.30867	21.8468	32.7716	11.8542	11.7631	14.205	2.60949	19.1378	18.4453	15.707	15.043	11.4074	11.9378	7.68872	9.18129	8.47836	7.70602	2.30658	2.83683	2.01295	0.0869952	1.91514	2.7452	1.54177	1.2812	1.67544	0.338631
Akr7a5	23.3152	12.5394	16.6678	6.40937	14.6626	9.8267	8.36864	13.717	3.31289	6.39016	12.7814	11.1012	9.03308	10.2707	6.56039	7.86393	5.64496	6.16364	4.17435	3.15946	1.82416	1.12955	1.8452	0.624045	2.23502	1.24959	1.4825	2.22546	0.793629	2.02255
Akt1	44.957	39.3541	41.2203	45.0422	22.1781	41.4347	16.0394	21.3826	16.5087	14.1526	111.224	96.891	100.415	89.273	94.8029	90.1266	52.2009	68.7855	44.1858	42.7845	0.404201	0.406169	0.410501	0.504545	0.233939	0.459738	0.307263	0.310859	0.373621	0.330788
Akt1s1	15.1161	38.0064	10.7366	0.761826	3.39142	18.6882	3.35714	11.0868	4.72529	6.07634	12.6867	10.0005	7.06553	11.4591	5.03082	8.69694	4.60092	5.39473	5.74512	7.08742	1.19149	3.80045	1.51958	0.0664821	0.674129	2.14883	0.729666	2.05512	0.822488	0.857342
Akt3	8.68466	7.8272	4.54378	8.20675	3.34895	17.196	9.04117	15.1047	11.4532	15.2734	13.3796	15.0546	15.1107	13.2561	11.4892	13.3964	16.6199	19.3177	24.4181	28.4213	0.649096	0.519922	0.300699	0.619093	0.291487	1.28362	0.543998	0.781909	0.469046	0.537392
Alad	23.6854	26.711	20.4283	7.16226	38.9696	3.66034	7.01376	7.15318	3.70204	2.77697	12.8628	11.0995	9.93136	8.87565	8.43461	9.29711	4.6233	5.47882	2.70062	2.50351	1.84139	2.40651	2.05694	0.806955	4.6202	0.393707	1.51705	1.30561	1.37081	1.10923
Alas1	38.7274	31.1001	34.3841	7.31926	47.9696	52.9915	57.6387	78.0602	113.496	100.744	20.272	18.6565	17.7609	17.15	27.2682	26.095	39.5989	46.1511	71.6506	76.4073	1.91039	1.66698	1.93595	0.426779	1.75918	2.03072	1.45556	1.6914	1.58402	1.31851
Alcam	349.916	223.739	261.541	203.872	245.521	294.489	514.127	471.653	552.841	616.838	103.369	117.507	107.271	102.065	120.833	148.771	249.701	249.01	280.691	300.922	3.38512	1.90406	2.43813	1.99746	2.03191	1.97948	2.05897	1.89411	1.96957	2.04983
Aldh16a1	25.5596	26.3781	25.8528	15.409	23.7728	20.9998	19.6404	18.8443	16.6879	15.6067	15.2999	11.6903	12.3095	12.1867	10.3048	10.9339	12.042	14.0806	10.6813	9.40432	1.67057	2.25642	2.10023	1.26441	2.30697	1.92061	1.63099	1.33832	1.56234	1.65953
Aldh18a1	12.7299	5.97414	11.9232	14.5587	8.60482	16.1418	10.0281	13.7305	6.88739	9.67669	6.38834	7.37121	6.83197	5.35656	7.07199	6.608	6.26876	7.79843	4.82131	4.59126	1.99268	0.810469	1.74521	2.71791	1.21675	2.44276	1.59969	1.76067	1.42853	2.10763
Aldh1l1	0.863936	8.14574	3.50649	5.66033	3.39205	1.33512	7.03532	8.20019	12.8282	10.7079	4.69177	4.98286	3.91943	3.85143	2.61651	3.20534	5.8737	6.52342	8.79092	8.24191	0.184139	1.63475	0.894643	1.46967	1.2964	0.41653	1.19777	1.25704	1.45925	1.29921
Aldh2	261.817	350.115	258.677	280.05	229.404	244.468	250.896	216.089	198.351	185.386	75.4155	74.3587	66.3781	73.355	59.1791	70.9822	69.0637	78.387	70.3889	68.6039	3.47165	4.70846	3.89702	3.81774	3.87643	3.44408	3.63282	2.75669	2.81792	2.70226
Aldh3a2	45.5269	24.1156	26.0823	23.2027	16.0675	15.4153	19.5027	15.5592	20.3882	11.3095	18.7786	17.6045	13.8715	12.4598	10.8277	12.2538	10.6112	10.6748	9.0935	10.7722	2.42441	1.36985	1.88028	1.8622	1.48393	1.25801	1.83794	1.45756	2.24206	1.04989
Aldh3b1	53.1912	54.0856	39.2142	17.5925	38.8474	28.6849	18.6633	28.3274	29.8777	24.4999	22.0986	22.0996	19.9952	19.6173	16.7069	17.0713	18.0652	19.7468	16.3395	13.9655	2.40699	2.44735	1.96118	0.896781	2.32523	1.6803	1.03311	1.43453	1.82855	1.75432
Aldh4a1	7.86349	7.6964	7.39227	6.2943	4.41061	7.86319	2.73946	1.79609	6.50682	3.71878	2.78931	4.06064	2.38465	2.86899	1.70879	2.16386	1.3773	1.5591	1.67812	1.61718	2.81915	1.89537	3.09994	2.19391	2.58113	3.63387	1.98902	1.15201	3.87744	2.29954
Aldh6a1	6.81	13.849	6.04625	33.8923	3.81971	10.5241	6.51188	3.30536	5.32202	7.69916	4.20261	5.74	4.73957	4.58318	3.85297	3.34136	3.01342	3.51621	4.23533	3.69131	1.62042	2.41272	1.27569	7.39494	0.991367	3.14965	2.16096	0.940036	1.25658	2.08575
Aldh9a1	90.1674	91.4056	67.0937	56.8037	42.4265	52.2541	41.9049	34.6874	29.3608	14.3471	34.3405	34.1921	27.5291	25.8268	23.2068	23.5953	16.8545	19.268	11.553	11.9335	2.62568	2.6733	2.43719	2.19941	1.82819	2.2146	2.48627	1.80026	2.5414	1.20225
Aldoa	1091.66	986.303	897.514	734.713	745.091	880.991	717.632	827.841	710.483	673.215	781.952	576.24	639.178	505.648	541.775	463.306	584.318	624.594	616.075	497.944	1.39608	1.71162	1.40417	1.45301	1.37528	1.90153	1.22815	1.32541	1.15324	1.35199
Aldoc	52.9114	70.9856	46.2518	78.9184	42.9125	38.122	40.4937	44.4221	20.1164	44.1912	29.1228	27.7002	26.4667	25.3156	20.9173	20.819	21.6095	25.5535	18.4176	17.1791	1.81684	2.56263	1.74754	3.11738	2.05153	1.83112	1.87389	1.73839	1.09224	2.57239
Alg1	36.1386	39.1894	32.4277	37.9217	21.4802	10.4195	17.1702	15.3589	26.5563	20.0559	28.7025	27.5525	27.3065	26.8684	21.8647	23.7533	17.613	17.4586	17.891	15.1739	1.25908	1.42235	1.18754	1.41139	0.982414	0.438654	0.97486	0.879734	1.48433	1.32174
Alg10b	46.2998	31.4191	15.3375	35.0016	15.5817	21.8864	10.4844	7.40271	5.10824	5.47399	29.3314	24.6712	21.7912	21.0804	21.0471	19.814	9.73134	10.5029	7.08586	7.32965	1.5785	1.27352	0.703839	1.66039	0.740323	1.10459	1.07738	0.704826	0.720906	0.746829
Alg11	17.8016	11.7842	13.1103	16.9305	24.1569	16.4176	10.8404	15.2368	10.7706	10.9647	9.4164	10.0822	7.51952	8.08808	10.0336	9.86535	9.23321	7.57144	8.69039	8.07734	1.89049	1.16881	1.7435	2.09327	2.40761	1.66417	1.17407	2.0124	1.23937	1.35746
Alg12	30.9713	9.709	11.2724	0.50899	15.8611	10.405	6.7289	4.79297	7.89264	11.1642	14.1033	13.7057	12.1486	10.0921	10.5541	8.14568	5.74697	5.10612	7.50236	6.15855	2.19603	0.708393	0.927872	0.0504347	1.50284	1.27736	1.17086	0.938671	1.05202	1.8128
Alg14	11.9464	14.5768	23.6376	23.4812	18.0919	6.46169	12.3816	13.9162	11.2034	6.00278	15.7981	13.6032	12.564	10.9602	12.1663	10.6954	8.12211	8.88236	7.86323	7.18778	0.756197	1.07157	1.88138	2.14241	1.48705	0.604157	1.52443	1.56673	1.42478	0.835136
Alg2	45.3936	34.4883	28.3932	60.1714	25.8099	18.739	7.82582	10.463	14.5788	9.99851	13.4201	12.0253	8.97611	8.55741	7.69865	7.42281	4.44369	3.54461	3.93179	3.86775	3.3825	2.86799	3.1632	7.0315	3.35253	2.52451	1.76111	2.9518	3.70794	2.5851
Alg3	49.7521	41.0622	27.9458	17.0147	20.5971	29.2902	19.7312	21.0817	9.72034	12.7972	11.592	8.62814	8.97714	7.88298	8.16079	7.5001	7.75972	7.42765	7.64347	7.24759	4.29193	4.75911	3.11299	2.15841	2.52391	3.9053	2.54278	2.83827	1.27172	1.76572
Alg5	68.2947	97.1459	67.2593	57.0958	60.8393	84.4338	47.5847	55.1169	45.2095	33.5088	26.6053	30.8201	29.9892	26.8379	22.3015	27.4122	19.9763	21.2671	18.3639	18.3242	2.56696	3.15203	2.24279	2.12743	2.72804	3.08016	2.38206	2.59165	2.46187	1.82867
Alg8	63.7116	46.0191	45.8543	61.2323	21.0535	51.5195	34.1861	38.3549	40.5273	39.2102	14.0029	11.6875	11.967	10.4663	11.1444	10.3571	9.14212	9.7434	7.57668	7.2482	4.54988	3.93747	3.83174	5.85043	1.88915	4.97433	3.7394	3.9365	5.34895	5.40965
Alg9	14.0302	20.0432	9.70649	4.49972	10.0157	14.7833	10.5439	10.4555	16.9453	17.304	11.0197	9.76349	9.73174	7.77368	12.1405	10.2531	12.3006	11.38	14.0802	12.8766	1.27319	2.05288	0.997406	0.578841	0.824984	1.44184	0.857188	0.91876	1.20348	1.34384
Alkbh3	7.28325	15.148	16.6279	11.7002	23.4896	0.703469	8.76169	18.8537	6.40335	4.57455	9.92037	12.162	8.82372	8.4701	7.90816	9.76611	8.81007	11.3268	10.6636	8.95664	0.734172	1.24553	1.88446	1.38135	2.9703	0.0720316	0.994508	1.66452	0.600489	0.510744
Alkbh4	6.03182	3.82332	1.31151	0.651417	13.5329	1.99747	2.55164	0.557649	4.04047	6.92762	4.74033	2.85038	1.155	1.55883	4.21568	4.86501	1.79601	1.92204	2.90284	2.94255	1.27245	1.34134	1.13551	0.417888	3.21014	0.41058	1.42073	0.290135	1.3919	2.35429
Alkbh5	9.81712	10.5267	18.9264	26.7175	8.44314	8.09138	8.96342	5.92969	9.20651	17.1005	29.3572	24.1474	22.3362	26.7663	21.956	24.4932	16.5318	19.5618	19.3681	19.7686	0.334403	0.435934	0.847343	0.998177	0.384548	0.330352	0.542193	0.303126	0.475344	0.865035
Alkbh6	15.284	30.2747	15.7854	9.07843	18.3702	0.843566	10.1025	14.1303	2.55953	18.1024	20.3272	14.5146	14.971	15.7997	16.0231	14.1765	10.2396	12.3921	9.10949	8.38815	0.7519	2.08581	1.0544	0.574595	1.14648	0.0595043	0.986615	1.14027	0.280974	2.1581
Alkbh7	39.76	31.7548	33.8888	32.4623	33.0059	22.1202	12.3625	19.5556	7.4574	11.987	22.7141	18.0084	15.7422	14.3855	11.9094	13.7254	7.1822	9.2234	5.60498	6.85342	1.75046	1.76333	2.15273	2.25659	2.77142	1.61162	1.72126	2.12021	1.3305	1.74906
Alox5ap	1379.46	1255.71	1034.79	1238.16	1048.84	1028.68	555.996	487.458	523.624	355.373	463.291	431.657	390.348	363.574	331.427	348.618	249.705	236.713	186.678	159.515	2.97752	2.90904	2.65094	3.40554	3.16461	2.95074	2.22661	2.05928	2.80496	2.22784
Alpk1	5.04088	3.02879	5.75426	2.06418	3.88769	2.75901	14.9271	15.2238	15.7578	14.7753	6.37723	7.97661	7.66632	7.17863	6.75261	6.8779	22.2746	22.6752	22.3482	25.7782	0.79045	0.379708	0.75059	0.287545	0.575732	0.401141	0.670141	0.671386	0.705104	0.573171
Als2	6.69208	9.12435	3.18297	6.53461	3.75356	6.24823	2.99314	3.42858	1.9612	1.26097	8.73166	10.0573	9.11376	7.51236	6.8765	7.19672	5.81177	6.71714	5.86725	5.90585	0.766416	0.907235	0.349249	0.869847	0.545854	0.868206	0.515013	0.510422	0.334262	0.213513
Alyref	121.185	123.128	138.722	118.558	145.655	74.754	83.6822	82.38	76.4015	60.8922	94.9144	90.2405	81.2701	74.8746	73.8174	76.5512	61.15	72.1832	41.0091	44.0077	1.27678	1.36445	1.70693	1.58342	1.97318	0.976523	1.36848	1.14126	1.86304	1.38367
Ambra1	10.749	9.49454	7.7257	11.5871	8.70869	7.22908	13.0415	13.1397	14.0006	10.2021	6.29654	6.26801	5.91094	4.92567	5.10775	4.961	8.96956	10.518	8.05722	8.12464	1.70713	1.51476	1.30702	2.35239	1.705	1.45718	1.45398	1.24927	1.73765	1.2557
Amdhd2	47.6728	46.5354	21.284	64.3906	11.4089	34.3809	15.5286	25.0929	16.3928	19.1635	26.8983	24.7058	20.7758	25.3388	19.4836	19.9432	16.4661	17.77	17.9871	16.9773	1.77234	1.88358	1.02446	2.54119	0.585563	1.72394	0.943068	1.41209	0.911365	1.12877
Amfr	96.6676	73.4382	79.1291	77.0701	97.0502	63.3965	64.0461	44.4224	67.6104	76.9412	77.0441	69.7617	72.5338	62.3245	74.7395	75.5765	68.1288	63.9818	67.2143	58.4854	1.2547	1.0527	1.09093	1.2366	1.29851	0.838839	0.940075	0.694296	1.00589	1.31556
Amn1	2.01548	13.414	6.13521	17.522	3.39142	7.78677	17.9047	20.2172	18.9012	13.1654	5.86361	4.87203	4.88353	5.07847	4.72897	5.77086	10.9522	9.99025	9.71447	7.4971	0.343726	2.75327	1.25631	3.45025	0.717159	1.34932	1.63481	2.02369	1.94567	1.75607
Ampd2	21.7329	18.5172	21.3329	10.4768	15.0166	25.7979	10.8425	13.4531	2.95379	6.33056	8.53028	7.69394	7.82661	6.75612	8.49089	8.23092	6.53363	6.40105	2.13845	1.81824	2.54773	2.40672	2.72569	1.55072	1.76855	3.13426	1.6595	2.10171	1.38128	3.48169
Ampd3	24.7041	12.2	43.2661	39.654	93.3888	105.119	36.9529	43.3634	17.455	13.6035	7.51833	6.6305	16.1553	18.1912	36.2887	32.8631	11.9742	14.9124	4.75308	4.93896	3.28585	1.83998	2.67813	2.17985	2.57349	3.1987	3.08604	2.90787	3.67236	2.75432
Anapc1	27.9245	20.6749	25.3181	21.4133	18.3607	21.5772	16.7161	16.4287	13.783	11.8159	25.2592	26.7646	24.4389	22.1852	22.3181	20.0657	19.5734	20.908	16.0306	16.7622	1.10552	0.772472	1.03598	0.965206	0.822682	1.07533	0.854024	0.785762	0.859793	0.704913
Anapc10	25.2501	27.2307	25.6209	40.298	34.62	16.2589	17.135	14.5252	13.1553	10.5729	15.8793	14.7239	12.1495	12.5072	10.6445	12.8983	12.3914	12.0987	10.3965	11.0063	1.59013	1.84942	2.1088	3.22197	3.25238	1.26055	1.38281	1.20056	1.26537	0.960623
Anapc11	114.394	192.053	178.817	163.61	133.529	162.451	86.9753	102.043	57.9888	45.052	71.9583	59.5929	56.4241	51.1368	52.4774	49.8733	41.2729	45.0556	37.0146	29.1599	1.58973	3.22275	3.16916	3.19945	2.54451	3.25727	2.10732	2.26483	1.56664	1.545
Anapc13	98.3735	46.7661	77.5372	191.232	102.472	40.7212	53.3192	43.2001	24.7111	47.6648	27.5047	21.2321	21.0105	22.4722	17.5393	17.569	17.9584	19.5046	16.5699	12.2833	3.57661	2.20262	3.6904	8.50971	5.84246	2.31779	2.96904	2.21487	1.49132	3.88047
Anapc2	64.0503	72.764	64.2843	99.8819	68.7272	45.427	49.5927	57.4703	42.0755	56.2824	26.6786	24.5058	24.8848	20.4311	21.8728	22.8602	21.8814	24.555	22.6435	21.661	2.40081	2.96926	2.58328	4.88871	3.14213	1.98716	2.26643	2.34047	1.85817	2.59833
Anapc4	15.8269	20.6015	17.2064	25.3946	17.9357	13.4773	15.5426	19.4399	10.6018	17.5282	16.6412	17.3622	14.9865	11.9576	11.5453	11.7753	11.9257	13.1765	14.8987	14.2996	0.951069	1.18657	1.14812	2.12371	1.55351	1.14454	1.30329	1.47535	0.711591	1.22579
Anapc5	58.2201	30.1113	41.3163	18.3613	42.8728	29.2551	23.5334	25.1955	16.7481	21.8957	153.793	148.371	148.563	127.8	133.875	120.852	91.1261	100.579	77.9524	71.2954	0.378563	0.202946	0.278107	0.143672	0.320244	0.242074	0.258251	0.250504	0.214851	0.307112
Anapc7	31.6701	23.4201	21.6563	14.2263	26.0019	20.9249	18.1787	13.3667	13.9893	14.0684	10.537	9.83965	10.4588	8.48121	7.46981	8.58863	6.14999	7.2348	7.32673	7.91155	3.00562	2.38018	2.07063	1.67739	3.48093	2.43634	2.9559	1.84756	1.90935	1.77821
Angptl2	63.4069	42.433	47.4559	17.0344	17.3415	39.6814	6.40094	5.0869	6.14288	6.05609	22.6186	27.3347	23.6114	18.9596	15.0683	13.4827	4.57692	5.24688	2.87883	2.17293	2.8033	1.55235	2.00988	0.898458	1.15086	2.94313	1.39853	0.969509	2.13381	2.78706
Ank	93.4491	69.3985	69.5088	81.4217	53.0076	55.8897	25.7962	25.9673	8.66465	7.69331	63.6181	52.3933	56.9406	55.8736	47.4422	47.3949	19.0478	21.2761	9.35807	8.75703	1.46891	1.32457	1.22073	1.45725	1.11731	1.17923	1.35428	1.22049	0.925901	0.87853
Ankfy1	50.6115	49.3695	34.6306	30.8774	22.1624	29.159	61.2138	62.6342	65.5746	77.9659	39.946	46.9238	35.4989	33.3018	29.8318	30.383	52.8217	57.1608	58.5241	63.9455	1.267	1.05212	0.975541	0.927199	0.742911	0.959714	1.15888	1.09575	1.12047	1.21926
Ankhd1	10.7662	11.0975	11.285	13.7442	9.51388	12.2431	6.61683	7.62478	7.8582	7.24703	10.7882	12.5669	11.6663	11.077	9.49194	9.72398	6.11909	6.27803	6.52737	7.4695	0.997969	0.883075	0.967322	1.24079	1.00231	1.25907	1.08134	1.21452	1.20388	0.970217
Ankib1	5.46328	7.7728	6.86912	10.2355	4.92958	0.367084	12.1334	15.0648	11.6949	16.7096	13.4693	14.4908	14.303	13.8888	15.0835	14.4263	30.3184	35.793	31.7494	32.8418	0.405609	0.536395	0.480258	0.73696	0.326819	0.0254454	0.400201	0.420886	0.36835	0.508792
Ankle2	35.2067	23.402	17.7937	20.9266	14.6221	11.8369	32.5298	30.2631	47.8871	54.6919	16.775	19.7121	13.301	14.4467	12.5043	14.5016	28.4215	28.0551	36.3123	37.3112	2.09877	1.18719	1.33777	1.44854	1.16936	0.81625	1.14455	1.07871	1.31876	1.46583
Ankrd11	3.12376	5.08927	3.1201	3.54223	3.44946	3.24344	2.05959	1.89522	1.60205	2.10916	7.27035	7.83675	7.94132	8.40714	7.59252	7.52697	2.80004	3.76932	3.01025	3.66686	0.429657	0.649411	0.392894	0.421336	0.454323	0.430909	0.735557	0.502801	0.532198	0.575195
Ankrd12	2.02372	0.911956	2.21386	2.6773	0.141887	1.36826	0.514994	1.22781	1.48269	1.14398	2.02052	2.94483	2.11268	2.27995	1.26285	1.44862	1.34324	1.51094	1.54048	2.24188	1.00159	0.30968	1.04789	1.17428	0.112355	0.944527	0.383397	0.812618	0.962486	0.510276
Ankrd13a	29.6093	38.2365	32.6225	39.7565	22.8047	32.4404	22.7377	21.7359	18.6499	13.3235	52.971	48.6912	52.082	50.3666	52.0662	49.6166	34.8487	44.8623	39.6927	38.0876	0.558972	0.785286	0.626367	0.789343	0.437994	0.653821	0.65247	0.484502	0.469858	0.349812
Ankrd17	16.3986	15.1381	15.9135	24.6275	11.2968	11.6507	51.778	56.1251	51.8642	47.3377	14.0418	14.6184	15.1152	12.8134	15.6697	15.5699	47.162	52.8401	41.8217	48.0663	1.16784	1.03555	1.05282	1.922	0.720931	0.748282	1.09787	1.06217	1.24013	0.984843
Ankrd26	0.462928	1.96843	1.76147	0.933233	1.21172	1.07311	0.456942	0.499313	0.723557	0.775364	1.8447	2.61109	1.76605	1.70482	0.831968	1.15747	0.604963	0.764875	0.295905	0.288565	0.25095	0.753871	0.997406	0.547408	1.45645	0.927116	0.755323	0.652803	2.44524	2.68696
Ankrd28	12.837	6.02438	7.13897	13.8102	8.03102	6.67632	2.64995	3.35498	1.73633	1.48852	17.4458	18.8447	18.4538	18.0071	22.9965	22.5991	7.54658	8.4065	3.33933	4.06452	0.73582	0.319685	0.386856	0.766929	0.349227	0.295425	0.351145	0.399094	0.519964	0.366223
Ankrd40	12.789	9.75302	6.69116	13.898	16.5883	30.8813	15.0892	12.932	9.36995	4.01634	34.501	33.7116	30.9879	33.4127	29.688	27.1415	26.2197	33.4393	26.5542	27.3929	0.370685	0.289308	0.215928	0.41595	0.558754	1.13779	0.575491	0.386732	0.352862	0.146619
Ankrd44	4.97654	11.0405	13.7536	9.70238	26.0034	24.2865	26.9524	22.7138	3.68448	3.55346	9.92001	11.6466	11.3426	10.1366	17.3384	18.7806	22.1489	24.4988	3.20364	3.39671	0.501667	0.947954	1.21256	0.957165	1.49976	1.29317	1.21687	0.927139	1.15009	1.04615
Ankrd46	20.43	27.698	12.0925	24.883	2.54647	15.7862	11.3433	9.54883	5.32202	11.9765	10.5666	9.67497	5.96835	5.42648	5.32616	5.12647	4.56237	4.27571	4.05885	3.82973	1.93346	2.86285	2.0261	4.58547	0.478106	3.07935	2.48627	2.23327	1.31121	3.12723
Ankrd52	20.048	25.5874	15.6244	12.782	15.1738	13.6246	18.5073	17.82	16.9889	14.807	17.1719	14.9966	14.3202	11.8447	12.9505	12.0592	12.0707	14.8342	12.0803	11.9896	1.16749	1.70622	1.09108	1.07913	1.17167	1.12981	1.53324	1.20128	1.40633	1.23499
Anks1	5.89194	5.93049	6.64273	3.13441	1.34639	3.87821	7.43124	7.48481	14.3253	8.44304	6.99507	6.23289	5.3775	5.90744	2.44024	3.13292	6.57344	7.70146	11.6604	12.5352	0.842298	0.951482	1.23528	0.530587	0.551743	1.23789	1.1305	0.97187	1.22855	0.673546
Anln	39.8158	23.3667	23.4299	25.3748	14.2824	17.5292	5.82659	6.44178	0.542722	2.09369	13.9101	14.711	12.65	10.5141	10.4931	9.55942	3.41187	4.58971	1.05577	1.04459	2.86236	1.58839	1.85216	2.4134	1.36113	1.83371	1.70774	1.40353	0.514055	2.00433
Ano10	22.873	28.9623	27.9163	17.6177	28.5636	24.6768	10.5432	10.8924	10.1181	9.54143	14.6557	13.7816	13.5272	13.1607	10.2121	10.9646	10.4943	9.3268	12.1229	11.404	1.56069	2.10152	2.06371	1.33866	2.79702	2.25059	1.00466	1.16786	0.834628	0.836678
Ano6	54.9858	50.8802	49.6502	87.4435	48.4193	66.2627	44.1862	38.9033	23.3783	25.6248	31.3761	33.4379	30.374	30.8318	38.8281	41.8904	33.4658	36.039	19.0624	20.2224	1.75247	1.52164	1.63463	2.83615	1.24702	1.58181	1.32034	1.07948	1.22641	1.26715
Ano8	3.90988	8.13196	4.83514	5.54209	4.79728	6.98642	3.34676	1.73959	0.572921	0.73673	5.97188	5.09878	4.96362	6.07849	4.09896	5.42015	3.38343	3.22199	2.83694	2.3445	0.654716	1.59488	0.974116	0.911755	1.17036	1.28897	0.989161	0.539912	0.20195	0.314238
Anp32a	120.047	98.1197	93.7616	51.745	140.575	124.494	160.202	175.824	143.194	220.117	38.6573	37.5802	31.7043	32.9974	38.6915	49.4316	54.9759	71.0401	71.1677	76.7577	3.10542	2.61094	2.95738	1.56816	3.63322	2.51851	2.91404	2.47499	2.01207	2.86769
Anp32b	43.9493	84.2542	83.615	42.6142	75.5608	37.6508	36.0723	28.4422	13.4399	14.4022	16.5765	11.3046	13.5945	10.2469	12.1149	10.5572	5.64223	7.05634	3.02053	3.22379	2.6513	7.45307	6.15067	4.15874	6.23702	3.56635	6.39327	4.03073	4.44953	4.46747
Anp32e	77.9934	70.9861	57.0712	86.1741	60.0109	84.9896	68.4722	71.8286	18.7545	27.6337	12.1651	13.4213	11.1346	10.6595	10.8821	12.8232	9.42815	12.6387	8.1362	8.45515	6.41123	5.28906	5.12556	8.08422	5.51467	6.62781	7.26253	5.68323	2.30506	3.26827
Anpep	414.936	373.428	372.794	335.203	309.26	384.744	286.799	264.01	400.461	468.539	70.349	65.8435	72.1908	71.0554	78.3526	73.2806	74.0365	75.3872	108.903	121.704	5.89824	5.67144	5.16401	4.71749	3.94703	5.25028	3.87375	3.50206	3.67723	3.84982
Antxr2	123.648	120.532	133.611	121.801	125.798	158.824	74.2996	80.7128	42.6683	44.3786	99.7785	107.055	102.378	101.364	109.827	116.739	74.4575	70.9738	40.9746	36.9277	1.23923	1.12589	1.30507	1.20162	1.14542	1.3605	0.997879	1.13722	1.04134	1.20177
Anxa1	1345.48	1348.32	1457.92	1176.05	1467.52	1748.66	2103.11	2250.46	1861.6	1875.65	652.094	705.667	682.612	656.742	779.926	832.254	983.131	1120.85	988.555	1023.86	2.06332	1.91071	2.1358	1.79073	1.88161	2.10111	2.13919	2.00782	1.88316	1.83195
Anxa11	71.8649	46.7401	37.7716	40.2575	33.639	40.349	31.3852	39.4816	31.5156	39.4874	20.1282	14.5369	12.8472	14.1297	14.0924	13.5525	13.6754	16.6064	13.88	14.3975	3.57036	3.21526	2.94007	2.84914	2.38703	2.97723	2.29502	2.37749	2.27058	2.74266
Anxa2	712.946	692.728	638.548	524.435	779.072	739.276	856.316	888.933	750.103	858.3	288.028	319.574	275.8	260.027	317.138	343.282	359.914	442.787	388.833	416.275	2.47526	2.16766	2.31525	2.01685	2.45657	2.15355	2.37923	2.00759	1.92912	2.06186
Anxa3	150.226	163.502	136.451	135.548	114.16	169.126	145.892	145.83	143.912	144.07	79.0365	86.8808	78.6125	71.6983	75.5599	80.9724	73.1081	84.4318	80.3694	84.4166	1.90071	1.88192	1.73574	1.89053	1.51086	2.08868	1.99556	1.72719	1.79063	1.70665
Anxa4	227.382	226.82	249.602	311.019	184.884	171.273	322.736	341.944	387.359	360.844	95.8752	105.935	86.1887	86.5597	94.7305	98.757	151.564	182.644	180.669	192.424	2.37165	2.14113	2.89599	3.59312	1.95168	1.73429	2.12938	1.87219	2.14403	1.87525
Anxa5	827.736	847.853	923.091	796.407	861.568	903.767	988.19	1052.83	897.445	844.161	399.422	405.111	427.402	396.441	430.697	421.284	478.152	517.159	496.733	471.7	2.07233	2.09289	2.15977	2.00889	2.0004	2.14527	2.06669	2.03579	1.80669	1.78961
Anxa6	65.6819	68.9546	56.8279	39.3094	51.0946	61.9298	153.254	141.183	290.567	277.779	32.882	37.8032	27.734	27.8866	26.6611	31.4704	88.4924	90.2681	160.885	165.472	1.9975	1.82404	2.04903	1.40961	1.91645	1.96788	1.73183	1.56404	1.80606	1.67871
Anxa7	128.542	109.585	121.744	82.3226	151.754	161.781	298.569	294.242	290.839	304.329	60.274	64.4518	61.2905	60.2741	80.5354	88.9171	148.389	168.831	171.495	171.761	2.13262	1.70026	1.98633	1.3658	1.88431	1.81946	2.01207	1.74282	1.6959	1.77182
Aoah	44.9856	14.6173	30.4308	18.2063	24.9774	27.0358	85.9486	83.8097	186.435	193.162	9.8548	10.8397	8.5739	11.2736	14.1551	15.8694	51.0083	42.5245	79.8592	87.0255	4.56485	1.34849	3.54924	1.61496	1.76455	1.70364	1.68499	1.97086	2.33455	2.21961
Ap1b1	129.327	111.407	97.7913	71.3499	93.0661	61.6593	48.8891	51.6416	43.2232	35.257	47.4206	51.217	40.2305	37.2804	29.6987	31.1597	21.8075	23.3504	18.5108	18.6028	2.72723	2.1752	2.43077	1.91387	3.13367	1.97882	2.24185	2.2116	2.33503	1.89525
Ap1g1	44.9087	45.4299	56.3183	19.6049	24.3022	28.5915	45.5376	46.0506	45.971	40.5224	24.926	26.0129	20.4781	22.0677	19.3563	19.5391	25.7863	28.2485	29.1101	31.5251	1.80168	1.74643	2.75017	0.888398	1.25552	1.46329	1.76596	1.6302	1.57921	1.2854
Ap1g2	26.1553	17.5077	24.3659	17.3864	10.6234	26.1338	22.7013	25.9736	21.1453	28.7773	7.72863	7.91754	6.37003	6.1476	5.98831	6.32873	9.26493	10.014	8.99811	9.05636	3.38421	2.21126	3.82509	2.82817	1.77402	4.1294	2.45024	2.59373	2.34997	3.17757
Ap1m1	51.0371	48.0869	33.2245	42.7665	40.3531	39.9114	29.3614	39.7941	30.2746	50.3627	12.6202	12.3998	14.0116	9.7334	10.8054	10.6134	9.88695	12.0394	11.3772	12.5989	4.04409	3.87803	2.37121	4.39379	3.73452	3.76045	2.96971	3.30533	2.66099	3.99739
Ap1s1	187.878	229.427	242.058	203.079	244.962	178.282	237.911	221.842	154.554	144.09	81.7708	66.8867	69.8394	59.4149	65.3253	65.3989	62.73	73.3576	65.5125	69.2094	2.29761	3.43008	3.46592	3.41799	3.74988	2.72607	3.79262	3.02412	2.35916	2.08194
Ap1s2	250.594	191.331	128.788	91.031	83.9692	148.368	53.0043	64.2377	11.4452	40.0644	87.1074	82.9146	72.6483	75.1703	55.8893	56.3043	24.5489	33.0698	16.361	17.9934	2.87684	2.30757	1.77276	1.211	1.50242	2.63511	2.15913	1.94249	0.699539	2.22662
Ap2a1	37.2242	26.5442	25.9	13.2663	25.2039	23.2159	25.6872	27.1873	31.1687	23.1131	23.9377	19.1805	21.2739	20.872	18.3176	17.9497	17.1006	19.8878	16.0264	15.5652	1.55505	1.38392	1.21745	0.635602	1.37594	1.29338	1.50212	1.36704	1.94483	1.48492
Ap2a2	57.8594	47.7516	34.1299	9.83634	29.6581	26.7391	16.703	18.9908	12.332	12.1021	42.4962	42.8644	40.8466	37.7936	29.9901	29.7864	18.8766	22.5457	17.1026	15.7111	1.36152	1.11401	0.835563	0.260265	0.98893	0.897695	0.884852	0.842326	0.721057	0.770287
Ap2b1	90.8358	78.4881	70.3917	55.6895	77.8222	69.1186	87.6453	92.8376	86.3546	107.705	34.2494	34.776	35.3788	30.0238	32.8489	31.8744	43.2228	45.8626	51.0391	50.2238	2.65219	2.25696	1.98966	1.85484	2.3691	2.16847	2.02775	2.02426	1.69193	2.14451
Ap2m1	68.3589	83.809	68.9063	36.7184	50.7867	56.9908	57.4869	57.8212	66.0753	56.645	72.2552	62.825	66.4022	50.442	60.8281	55.4739	56.2718	57.7215	58.9544	49.9002	0.946076	1.33401	1.03771	0.727933	0.834921	1.02734	1.02159	1.00173	1.12079	1.13516
Ap2s1	464.495	488.767	459.673	345.596	491.204	419.916	313.286	320.801	154.958	209.411	284.935	250.05	245.143	232.729	217.77	208.792	174.477	206.033	172.321	173.084	1.63018	1.95468	1.87512	1.48497	2.25561	2.01116	1.79557	1.55704	0.899242	1.20988
Ap3b1	25.1533	38.8533	29.6969	22.5696	18.4596	18.7093	64.0425	59.7881	75.5062	85.1648	18.9754	21.9526	20.6509	19.8812	17.838	17.8796	32.3264	37.2872	40.4003	44.5436	1.32557	1.76987	1.43804	1.13522	1.03485	1.04641	1.98112	1.60345	1.86895	1.91194
Ap3d1	38.7985	49.5289	31.8354	36.8682	26.9897	31.3193	25.1925	24.4074	32.015	32.6736	36.1158	35.7944	34.0816	33.3295	28.653	29.4925	23.1588	28.1597	30.1398	31.1051	1.07428	1.38371	0.934095	1.10617	0.941948	1.06194	1.08782	0.866751	1.06221	1.05043
Ap3m1	27.2947	18.5788	11.802	15.0066	2.08766	6.71062	9.64392	15.6567	11.635	12.468	16.341	13.2196	15.0308	11.9836	14.0596	12.8586	12.006	10.27	14.1461	10.844	1.67031	1.4054	0.785192	1.25226	0.148487	0.521879	0.803257	1.52451	0.822488	1.14977
Ap3s2	51.2592	59.852	25.6638	11.2173	18.9152	39.6079	29.9584	25.3161	22.1379	17.6228	16.8394	13.4722	13.9084	11.0684	10.1011	10.6623	8.76939	8.82594	8.80881	7.8967	3.04401	4.44264	1.8452	1.01346	1.87258	3.71477	3.41625	2.86838	2.51316	2.23167
Ap4b1	2.55094	2.22328	4.43725	5.78535	6.13206	9.29235	2.8327	2.35838	8.54384	1.46489	4.51069	4.59004	6.31248	5.39174	6.65847	6.14304	3.77971	3.86558	3.19189	3.22963	0.565532	0.484371	0.702934	1.073	0.920942	1.51266	0.74945	0.610096	2.67674	0.453578
Ap4e1	6.00786	6.27976	4.74791	5.41523	5.83233	4.82081	4.87529	9.42103	2.16699	3.94766	5.01136	5.87971	5.17005	4.09061	4.89107	5.14388	5.49278	6.07046	4.28734	4.20842	1.19885	1.06804	0.918349	1.32382	1.19245	0.937193	0.887583	1.55195	0.50544	0.938037
Ap4s1	12.3177	16.2253	16.4044	23.2797	13.8179	19.0357	10.8286	8.96794	3.60986	20.1153	21.0128	18.4139	17.7806	15.1208	15.5268	12.5428	10.0861	9.99791	8.3789	8.19984	0.586199	0.881144	0.9226	1.53959	0.88994	1.51766	1.07362	0.896981	0.430827	2.45313
Ap5b1	23.2528	19.753	10.0798	4.8953	3.96225	6.59562	7.73545	4.57162	22.0825	19.6704	11.8951	9.43687	5.97865	5.40079	4.70207	4.91421	4.19218	4.2602	10.6326	10.0752	1.95483	2.09318	1.68597	0.906404	0.842662	1.34215	1.84521	1.0731	2.07687	1.95235
Ap5m1	11.631	14.0746	13.277	17.1859	7.11688	5.31066	8.61048	5.47427	6.1975	3.18779	7.9981	8.64326	7.41349	7.30971	4.8035	6.01242	4.56514	4.24531	4.84984	4.72839	1.45422	1.62839	1.79093	2.35111	1.4816	0.883281	1.88614	1.28949	1.27788	0.674183
Apaf1	11.6325	8.98624	8.22013	6.1243	5.82554	8.18583	22.6053	25.2727	23.3763	14.5081	10.9877	14.8657	15.485	14.6419	14.0823	15.0786	28.7193	30.6007	24.5673	27.1662	1.05868	0.604496	0.530846	0.418271	0.413678	0.542878	0.787111	0.825888	0.95152	0.534051
Apbb1ip	207.071	220.677	198.526	248.124	149.144	180.041	161.031	157.302	129.763	127.191	29.277	28.1423	26.698	23.2312	24.7324	24.6931	16.3073	21.0077	15.3858	21.1318	7.07282	7.84148	7.43597	10.6806	6.0303	7.29113	9.8748	7.48786	8.43399	6.01895
Apbb2	25.0015	32.6156	35.1052	37.8012	36.737	24.7605	19.6818	27.1185	14.0349	1.94632	18.9991	18.0772	16.9919	17.8367	19.4778	18.3475	12.6344	16.8436	6.71606	6.87138	1.31593	1.80424	2.06599	2.11929	1.8861	1.34953	1.55779	1.61002	2.08975	0.28325
Apeh	25.5986	20.9021	21.1043	20.427	20.7396	15.6591	16.0554	20.4778	18.3382	17.1502	11.9233	10.5847	10.5576	9.60175	9.69096	7.34105	9.82762	10.4857	11.7008	10.3922	2.14693	1.97474	1.99897	2.12743	2.14009	2.13309	1.63371	1.95292	1.56726	1.65029
Apex1	43.2582	61.5647	52.1752	53.681	40.7442	57.391	20.5438	27.9949	17.2221	20.5058	54.0533	52.8035	44.5181	40.3409	35.0415	34.8902	19.4016	23.7886	9.34854	10.2861	0.800288	1.16592	1.172	1.33068	1.16274	1.6449	1.05887	1.17682	1.84222	1.99355
Apex2	4.01004	7.22823	7.24777	9.47342	8.71572	3.09855	6.30836	4.86587	9.40155	3.27428	4.29535	4.01771	3.66949	2.97946	2.95278	3.23432	2.23878	1.96284	1.50676	1.97663	0.933576	1.79909	1.97514	3.17958	2.9517	0.95802	2.81777	2.479	6.23957	1.6565
Aph1a	32.3691	25.5691	29.1121	17.7966	28.0588	18.1902	26.8675	13.9653	29.8959	32.0364	45.8663	26.3317	36.6112	26.807	37.9008	26.424	30.0826	22.9973	39.8049	28.1126	0.705727	0.971038	0.795169	0.663878	0.740323	0.688398	0.893126	0.607259	0.751059	1.13958
Aph1c	24.1542	27.9095	19.9135	25.8684	14.677	17.8862	8.56818	3.9079	7.07871	2.02281	8.19837	10.9478	7.99026	8.97329	5.62718	6.41274	1.4484	1.74602	1.40833	0.818288	2.94622	2.54932	2.49222	2.88282	2.60824	2.78917	5.91561	2.23818	5.02632	2.472
Api5	83.5884	64.1031	58.8999	46.0279	52.0939	64.9873	50.9943	49.0862	37.5011	37.8528	43.0689	44.6723	40.5391	34.4368	34.1044	36.8723	33.5694	35.9852	34.7375	33.1423	1.94081	1.43496	1.45291	1.33659	1.52748	1.7625	1.51907	1.36407	1.07956	1.14213
Apip	37.7831	29.9364	26.2889	21.2183	41.1739	30.0291	25.1739	30.0406	20.2475	20.6123	18.387	16.8246	15.4715	13.3913	13.5807	15.9337	11.1966	14.8221	11.5813	11.1909	2.05488	1.77932	1.69918	1.58449	3.0318	1.88463	2.24835	2.02675	1.74828	1.84188
Aplp2	267.554	235.242	222.816	235.192	187.103	236.12	193.593	160.175	169.382	173.868	65.1314	79.8228	69.3233	75.6668	62.3663	76.0311	75.8405	72.2045	73.3283	75.9699	4.10792	2.94706	3.21416	3.10825	3.00007	3.10557	2.55263	2.21835	2.30992	2.28864
Apmap	47.5267	49.2507	40.9275	44.9114	48.4046	43.9719	37.2674	41.2796	54.2472	54.6748	17.2671	19.6119	17.4091	16.4845	17.2952	20.831	25.9752	23.5269	27.0302	24.5836	2.75244	2.51126	2.35092	2.72446	2.79873	2.11089	1.43473	1.75457	2.00691	2.22404
Apoa1bp	77.2935	73.4896	65.8239	77.9094	40.7731	44.7934	37.8064	45.2572	30.2025	24.0426	60.2573	54.7884	44.5913	45.4201	39.7807	45.1234	37.6727	35.4392	34.5748	30.1504	1.28272	1.34134	1.47616	1.71531	1.02495	0.992685	1.00355	1.27704	0.873539	0.79742
Apobec1	150.734	98.6866	89.6982	69.3988	24.7917	36.7805	49.0822	34.4721	47.828	48.4051	94.1203	91.5612	60.8814	57.7	28.9681	27.7886	29.64	30.6164	47.5188	48.5617	1.6015	1.07782	1.47333	1.20275	0.855828	1.32358	1.65594	1.12594	1.00651	0.996775
Apobec3	66.3763	48.4395	44.5314	101.018	33.8012	97.8537	310.995	340.822	253.906	221.618	22.0827	23.0011	17.65	17.6618	28.4275	34.0942	121.488	136.107	124.794	127.784	3.0058	2.10596	2.52303	5.71959	1.18903	2.8701	2.55989	2.50407	2.03459	1.73432
Apobr	53.9575	79.9046	66.2834	81.1672	66.6743	87.8301	69.6501	57.6076	55.8671	59.5919	22.3696	22.8422	21.83	22.8987	24.1472	28.3431	26.6275	31.6466	23.479	24.5187	2.41209	3.49811	3.03635	3.54462	2.76116	3.09882	2.61572	1.82034	2.37945	2.43047
Apoe	13446.6	15016.6	12804.7	14614.9	12835.5	11977	10594.1	9402.36	11738	11382.9	4451.67	4626.97	4002.49	4937.07	3683.38	4801.44	4228.54	4599.53	4672.62	4748.21	3.02057	3.24545	3.19919	2.96024	3.4847	2.49446	2.50538	2.0442	2.51209	2.3973
Apoo	13.5387	4.77839	5.61987	24.1916	15.1876	1.90205	9.11155	3.18606	2.88559	8.65815	6.11979	3.13179	4.56851	3.97598	4.79257	2.38248	2.38209	2.37929	2.16881	1.65117	2.21228	1.52577	1.23013	6.08444	3.16898	0.79835	3.82503	1.33908	1.3305	5.24364
Apopt1	12.0771	37.9569	17.3605	34.4912	30.1067	22.8114	16.888	13.0263	3.14609	5.39416	17.7454	18.2677	13.0058	15.3456	7.77086	11.3644	5.66042	6.65149	4.65966	5.89168	0.680577	2.07782	1.33483	2.24762	3.87431	2.00728	2.98352	1.95841	0.675177	0.915557
App	565.599	544.927	463.406	472.201	488.436	542.976	709.38	609.731	877.609	963.91	139.947	150.739	134.738	149.212	156.099	176.328	253.802	260.578	320.647	308.36	4.04152	3.61503	3.43931	3.16464	3.12902	3.07935	2.79501	2.33992	2.73699	3.12592
Appbp2	30.172	23.8708	29.0392	29.8534	27.1272	18.8568	24.6357	24.6947	18.7248	16.9442	17.1803	17.4152	15.0972	13.5023	18.5179	16.5696	15.6337	16.825	13.6137	14.4845	1.75619	1.37068	1.92348	2.21099	1.46491	1.13804	1.57581	1.46774	1.37544	1.16981
Appl1	26.8815	32.4734	25.7816	11.9704	36.5584	33.5755	88.1889	89.1277	57.8437	53.1038	16.0113	16.9597	16.0985	15.2979	31.5456	32.1658	48.2258	53.5902	38.8568	38.2936	1.6789	1.91474	1.60149	0.782483	1.15891	1.04383	1.82867	1.66314	1.48864	1.38676
Aprt	275.945	253.207	292.458	320.011	235.812	224.385	147.062	169.23	98.2286	105.262	194.416	143.188	143.451	138.24	119.437	123.052	87.0397	112.789	76.6739	69.8338	1.41936	1.76836	2.03873	2.31489	1.97435	1.8235	1.6896	1.50041	1.28112	1.50732
Aqr	20.7798	22.2268	17.2256	17.1116	14.7773	13.9061	13.0484	16.6897	9.56968	9.3226	17.8223	20.2648	18.4029	18.1485	15.2641	16.0418	13.0099	15.7168	10.885	11.7136	1.16594	1.09682	0.936027	0.942869	0.968107	0.866865	1.00295	1.0619	0.879162	0.79588
Araf	102.033	79.8463	87.2215	77.1346	33.7108	54.0004	31.5593	30.7544	32.7694	28.0926	65.6532	65.1735	59.6632	58.8784	52.1928	51.6319	40.8548	43.578	44.6228	41.1956	1.55412	1.22514	1.4619	1.31006	0.645891	1.04587	0.772474	0.705733	0.734365	0.681932
Arap1	23.3035	33.4593	29.9991	27.9894	26.0195	30.7962	44.9832	37.7731	75.0594	77.0412	38.4777	38.4735	41.5654	43.339	47.4909	51.0642	87.2748	96.6505	139.016	139.147	0.605637	0.869671	0.721732	0.645826	0.547885	0.603088	0.51542	0.390821	0.539933	0.553668
Arap3	14.2214	14.7892	8.11702	22.0397	8.97385	6.3186	2.10563	3.22123	2.91744	0.625266	14.0297	12.4619	11.0341	10.6814	8.27104	8.15832	3.68756	4.07975	1.8795	1.67663	1.01367	1.18675	0.735628	2.06338	1.08497	0.774498	0.571009	0.789567	1.55225	0.372931
Arcn1	51.7658	42.503	47.1189	42.9704	47.2535	71.7635	54.29	67.0014	61.8725	77.5229	40.1606	38.1924	39.5074	32.0353	39.7771	36.8401	48.4823	49.9598	53.4735	52.4667	1.28897	1.11287	1.19266	1.34135	1.18796	1.94797	1.11979	1.34111	1.15707	1.47756
Arel1	12.6142	8.57029	7.19968	4.05282	3.18387	1.46204	37.47	33.0617	19.2231	36.9206	15.5468	17.0316	13.3313	13.9566	17.7582	15.9733	88.844	89.0678	99.6493	101.51	0.81137	0.503199	0.540059	0.290386	0.17929	0.0915306	0.421751	0.371197	0.192908	0.363713
Arf1	388.618	468.457	345.944	449.894	339.429	396.686	337.591	335.021	353.016	332.176	211.178	196.767	207.296	186.968	204.171	183.555	219.97	227.672	247.49	199.085	1.84024	2.38076	1.66884	2.40627	1.66247	2.16113	1.53471	1.47151	1.42639	1.66851
Arf2	103.249	89.8737	85.1218	74.8017	62.7381	77.5643	26.0093	25.057	36.9826	23.0578	35.6515	43.422	41.6957	37.7085	29.9241	35.5081	14.4464	14.8559	17.9857	17.1394	2.89607	2.06977	2.0415	1.98368	2.09657	2.18441	1.8004	1.68667	2.05622	1.34531
Arf3	190.724	208.38	154.965	153.94	152.019	122.995	154.994	133.637	154.655	188.786	51.5808	49.3515	43.6179	39.1909	51.5439	48.3465	47.3244	55.7985	60.9434	55.6157	3.69758	4.22236	3.55279	3.92795	2.94932	2.54402	3.27515	2.395	2.53768	3.39447
Arf4	138.955	169.389	205.985	384.076	213.521	319.873	386.828	409.349	332.567	448.746	35.679	33.7001	48.0558	49.2837	55.0614	56.9713	96.7562	111.422	106.299	116.098	3.89458	5.02635	4.28637	7.79317	3.87787	5.61463	3.99797	3.67386	3.12859	3.86525
Arf5	215.669	226.387	204.883	274.653	142.888	178.95	185.913	154.56	217.186	189.099	91.4179	83.1454	65.0694	67.8001	71.392	79.7365	86.0534	91.9789	105.324	92.1485	2.35916	2.72278	3.14869	4.05092	2.00146	2.24426	2.16044	1.68038	2.06208	2.05211
Arf6	238.961	220.072	237.98	148.31	180.364	192.623	97.1876	101.188	141.79	166.766	168.223	137.373	140.075	163.443	121.65	139.317	80.2291	96.4395	135.238	125.329	1.4205	1.602	1.69895	0.907413	1.48265	1.38262	1.21138	1.04924	1.04845	1.33062
Arfgap1	9.95195	12.1431	16.1569	13.0406	13.3968	9.22782	14.9805	29.1969	13.9994	28.3367	12.4235	14.3076	9.85072	10.845	8.61155	9.89974	11.7542	11.872	12.0005	12.4071	0.801056	0.848722	1.64018	1.20246	1.55568	0.932128	1.27447	2.45931	1.16657	2.28392
Arfgap2	15.0182	26.3766	17.9055	4.16291	29.202	28.6244	27.6097	29.1574	19.9524	22.8903	14.723	13.8208	14.8654	11.7083	15.5945	14.5356	15.3779	15.8561	14.4773	12.4346	1.02005	1.90847	1.20451	0.355551	1.87258	1.96926	1.79542	1.83888	1.37818	1.84085
Arfgap3	16.3926	11.2958	13.9871	9.76371	9.47317	7.29284	13.9742	16.0736	18.6339	16.2241	8.04044	8.7847	7.47781	7.34953	7.34034	7.7326	9.195	10.1445	13.1814	11.1068	2.03877	1.28585	1.87048	1.32848	1.29056	0.943129	1.51976	1.58447	1.41365	1.46073
Arfgef1	13.7723	11.3798	12.0851	16.9984	11.5873	9.33874	11.8082	14.0969	10.2139	15.5352	23.0296	25.6305	23.8795	22.327	20.2613	19.9606	21.6407	24.7708	23.3363	24.6979	0.598025	0.443993	0.506087	0.76134	0.57189	0.467858	0.545649	0.569091	0.437685	0.629008
Arfgef2	13.324	14.619	14.9891	9.19673	9.74787	15.4431	7.18339	8.34155	8.14907	5.74892	15.5053	16.7306	16.5303	15.28	12.7681	12.7323	8.68205	9.44714	8.01633	8.69014	0.859314	0.873789	0.906765	0.601881	0.763454	1.21291	0.827385	0.882971	1.01656	0.661545
Arfgef3	5.01286	7.14924	4.99564	9.02286	3.4142	4.79567	3.09253	2.39447	0.839476	0.659694	5.4295	5.04902	5.85776	5.2591	5.21953	4.76515	2.68314	3.30118	0.884567	0.917049	0.923263	1.41597	0.852824	1.71567	0.654121	1.0064	1.15258	0.725337	0.949025	0.719366
Arfip1	38.2641	18.5212	27.0017	15.2523	14.048	12.3642	27.2969	46.3743	19.5732	32.1611	16.3394	17.6584	12.5532	13.4397	11.0445	11.6154	19.9211	22.9669	19.1101	19.3455	2.34183	1.04886	2.15098	1.13487	1.27194	1.06447	1.37025	2.01918	1.02423	1.66246
Arglu1	30.5734	6.88871	30.5377	17.3346	14.4691	17.718	27.5847	22.2591	22.3999	28.8044	11.4216	12.1555	7.88085	11.8519	8.39456	13.0232	6.63792	11.8395	6.04106	9.28297	2.6768	0.566715	3.87492	1.46261	1.72363	1.3605	4.15562	1.88007	3.70794	3.10293
Arhgap1	77.6192	82.7877	62.3738	68.9367	59.6722	65.8479	46.4113	63.9315	38.1773	40.3653	20.9021	20.6828	19.0843	16.4474	16.3667	15.1914	14.9229	16.8963	16.907	19.2859	3.71347	4.00274	3.26833	4.19135	3.64595	4.33456	3.11008	3.78376	2.25808	2.093
Arhgap10	45.3499	40.5741	30.9851	34.2835	38.8048	31.4609	21.4424	22.2792	17.0738	12.1421	40.2025	42.9992	40.752	39.8651	38.7351	43.786	24.5424	29.9609	17.6535	18.9341	1.12804	0.943599	0.760334	0.859987	1.0018	0.718515	0.873689	0.743609	0.967163	0.64128
Arhgap11a	14.6776	10.3211	19.3478	14.2662	14.4071	12.759	15.6197	17.4709	4.30147	8.95552	15.6388	16.5397	16.0795	14.6818	11.3836	11.2676	11.7323	14.5767	7.72928	8.12994	0.938542	0.624019	1.20326	0.971697	1.26561	1.13237	1.33134	1.19855	0.556517	1.10155
Arhgap12	24.5629	14.3309	12.8664	13.987	3.04173	5.17629	9.32816	7.63839	4.48737	11.7011	17.7513	23.0119	15.4588	17.5598	7.16627	9.26247	7.36126	7.70047	8.48136	9.35017	1.38373	0.622763	0.832303	0.796537	0.424452	0.558845	1.2672	0.991939	0.529086	1.25143
Arhgap15	15.7895	21.6847	17.738	11.9365	5.48247	12.7815	14.1938	11.1915	12.3395	20.0235	14.3974	18.9884	12.0938	16.1279	12.762	13.6448	12.4252	14.2741	16.2886	17.6063	1.09669	1.14199	1.4667	0.740114	0.429592	0.936731	1.14234	0.784045	0.757555	1.13729
Arhgap17	70.6973	61.3486	47.8808	48.5868	35.4798	52.5366	120.702	133.317	116.58	119.998	16.8909	17.15	15.5902	14.2275	8.88246	9.1398	30.8708	35.764	32.8888	39.9207	4.18552	3.57718	3.07121	3.41499	3.99437	5.74812	3.90989	3.72768	3.54468	3.00591
Arhgap21	4.49996	3.37666	2.61876	4.80264	0.371179	1.94309	1.27375	1.02783	0.620599	0.332517	8.23308	8.25939	9.18404	8.3202	8.51014	8.20902	3.33659	4.21176	1.44734	1.57649	0.546571	0.408827	0.285142	0.577226	0.043616	0.236702	0.38175	0.244038	0.428785	0.210922
Arhgap24	3.93551	3.49238	7.18794	7.14038	3.75261	4.25735	1.45674	2.5469	2.76805	1.97749	3.91367	4.53137	3.4897	3.73775	3.1042	2.79331	1.52337	1.69715	1.36658	1.27993	1.00558	0.770713	2.05976	1.91034	1.20888	1.52412	0.956258	1.5007	2.02553	1.545
Arhgap25	16.3944	29.9395	23.7355	6.65031	2.91566	2.47178	13.6169	17.8555	15.9372	21.4985	20.8551	21.3668	14.8836	15.0874	2.23573	3.06387	9.54478	11.4165	17.8639	18.8078	0.786107	1.40122	1.59474	0.440785	1.30412	0.806754	1.42663	1.56401	0.892142	1.14306
Arhgap27	8.14024	15.0493	8.84975	6.15383	2.17421	0.599042	0.717409	0.501717	1.8176	0.194774	9.92404	8.5565	6.7545	7.86391	3.0962	2.31358	0.750226	0.672488	1.788	1.65463	0.820255	1.75881	1.3102	0.782541	0.702218	0.258924	0.956258	0.746061	1.01656	0.117714
Arhgap30	29.5736	34.3791	22.6859	36.6654	18.5782	23.9483	31.001	25.4163	36.6091	51.8315	38.445	42.9383	33.9564	34.3316	25.5116	29.005	39.8723	41.9832	65.539	66.6148	0.769243	0.800664	0.66809	1.06798	0.728226	0.825662	0.777509	0.605393	0.558584	0.778078
Arhgap31	21.5762	16.7936	17.3856	18.23	16.7801	30.6818	23.8922	23.4676	23.3798	16.8544	9.1304	9.03105	10.7681	10.6249	18.8994	18.1775	16.331	22.7108	14.631	17.2111	2.36311	1.85954	1.61455	1.71578	0.887862	1.6879	1.463	1.03332	1.59796	0.979273
Arhgap4	23.3465	20.3477	13.1137	11.1359	21.2014	16.5364	15.6374	11.6914	16.2904	7.96032	17.7302	18.476	15.0163	14.9581	11.7105	11.7241	10.6204	11.2417	7.5624	7.61547	1.31676	1.10131	0.873301	0.744472	1.81046	1.41047	1.47239	1.04	2.15414	1.04528
Arhgap45	52.4804	49.1499	39.4128	44.5462	26.9831	20.9872	4.60082	5.95845	8.09477	13.3007	40.7149	42.1261	37.4742	40.0488	20.7985	21.0899	6.33964	7.67849	11.3688	11.1073	1.28897	1.16673	1.05173	1.1123	1.29736	0.995126	0.725722	0.775992	0.712018	1.19747
Arhgap5	6.69431	6.75926	9.01326	10.6405	4.81386	2.12212	1.71547	1.88843	2.01216	2.41497	17.1423	19.9275	16.9549	15.9031	11.6539	10.3695	3.42434	3.36075	2.2863	2.21903	0.390515	0.339193	0.531603	0.669086	0.41307	0.20465	0.500965	0.561906	0.880094	1.0883
Arhgap6	9.33185	8.20971	5.38747	2.91917	2.34637	3.72967	11.5537	13.1196	0.754433	3.07211	4.28939	3.80743	4.31322	4.09569	3.1486	3.58166	6.00437	7.33713	2.50161	2.76024	2.17557	2.15623	1.24906	0.712742	0.745211	1.04133	1.92421	1.78811	0.301579	1.11299
Arhgap9	20.905	36.6141	26.3754	11.2289	18.514	15.3031	6.10896	8.54454	5.15914	3.86998	45.8615	46.0194	37.9473	37.9602	29.6607	31.7254	12.6403	15.2978	12.6593	11.8532	0.455829	0.795621	0.695053	0.295808	0.624194	0.48236	0.483292	0.558548	0.407539	0.326491
Arhgdia	1282.28	1129.99	1189.02	1097.41	1032.77	1134.47	813.531	837.257	826.961	749.246	326.41	311.782	293.835	282.682	294.451	295.686	239.499	326.32	277.774	302.213	3.92845	3.62429	4.04658	3.88212	3.50745	3.83674	3.39681	2.56576	2.9771	2.4792
Arhgdib	1441.18	1242.83	1078.11	651.678	693.409	820.997	618.378	772.661	647.569	660.357	359.132	367.847	319.01	286.821	286.896	306.318	257.892	328.141	307.659	314.132	4.01295	3.37866	3.37955	2.27207	2.41694	2.68021	2.39782	2.35466	2.10483	2.10216
Arhgef1	35.8948	45.7151	39.457	44.422	31.4676	27.9413	20.9632	24.6062	15.5844	14.2954	21.7999	18.0473	21.1643	18.9824	18.6361	16.8131	13.3269	16.5006	8.77801	9.77149	1.64656	2.53308	1.86432	2.34017	1.68852	1.66187	1.573	1.49123	1.77539	1.46297
Arhgef10l	11.3548	11.3583	9.72126	19.1606	7.50614	5.0136	0.750532	0.393661	6.65532	2.13955	13.8787	12.0988	10.265	11.1352	4.23114	4.4483	1.11692	1.23621	3.96178	3.30544	0.818142	0.938792	0.947028	1.72071	1.77402	1.12708	0.671965	0.31844	1.67988	0.647283
Arhgef12	2.69374	1.77415	1.79372	4.07281	2.3608	0.910633	1.86955	0.871639	1.97359	1.52273	3.81158	4.35892	3.88841	3.81798	3.54682	3.53056	3.10805	3.87215	2.99287	3.34687	0.706726	0.407015	0.4613	1.06674	0.66561	0.257928	0.601517	0.225104	0.659429	0.45497
Arhgef2	42.4284	56.2719	52.5441	36.657	51.8825	45.613	45.359	44.0009	42.6315	59.4553	29.9427	28.281	31.9269	29.711	29.5745	32.1592	22.9388	29.0251	22.5905	27.0191	1.41699	1.98974	1.64576	1.23379	1.7543	1.41835	1.97739	1.51596	1.88715	2.20049
Arhgef3	4.71015	8.35958	6.45207	8.9019	44.1198	43.6742	86.6503	106.078	61.8406	44.9678	2.54132	3.1461	6.70196	7.15143	19.4225	24.1996	50.7229	64.4847	31.4175	33.7584	1.85342	2.65712	0.962713	1.24477	2.27158	1.80475	1.70831	1.64501	1.96835	1.33205
Arhgef6	48.4107	39.1862	47.545	29.4262	31.1897	14.6594	17.7982	16.5114	8.43573	15.121	38.688	46.9634	38.4479	37.0046	27.1068	28.704	14.3334	18.2564	8.25594	8.3642	1.25131	0.834398	1.23661	0.795203	1.15062	0.510709	1.24173	0.904416	1.02178	1.80782
Arhgef7	94.9976	85.1116	73.8111	36.4102	40.4286	25.6659	14.631	18.9165	17.1325	24.5345	33.0316	32.7089	27.2956	24.0785	13.3319	13.3149	7.33527	10.8994	11.7406	12.9362	2.87596	2.60209	2.70413	1.51214	3.03246	1.92761	1.9946	1.73555	1.45925	1.89658
Arid1a	16.0722	12.9316	14.729	11.7224	8.88785	9.62029	17.8055	17.1401	19.106	12.7394	9.72293	8.86325	7.74894	7.34193	8.22693	7.25751	11.5989	13.3693	10.5061	12.2395	1.65302	1.45902	1.90078	1.59663	1.08034	1.32556	1.53511	1.28205	1.81857	1.04084
Arid1b	10.249	11.1132	9.28943	15.583	5.74862	7.83039	4.30518	3.94982	4.31978	5.3813	9.61221	9.13496	9.2376	9.47132	7.19757	6.86389	4.29181	4.98886	4.64929	4.88749	1.06625	1.21656	1.00561	1.64529	0.798689	1.14081	1.00312	0.791729	0.929127	1.10104
Arid2	8.63061	5.25759	7.96775	1.39048	1.50782	6.34088	4.92287	7.41665	1.65857	3.05699	6.82546	7.1913	7.16278	6.64564	4.52046	4.43911	6.83178	7.31467	3.36576	3.4626	1.26447	0.731104	1.11238	0.209231	0.333554	1.42841	0.720584	1.01394	0.492776	0.882858
Arid5b	5.87204	1.92995	1.82058	0.657648	9.75884	4.53731	18.1934	21.9564	13.767	11.9115	1.95569	2.4211	2.08544	1.88287	4.47315	5.08696	11.149	13.9387	9.34412	11.6353	3.00255	0.797137	0.872998	0.349279	2.18165	0.89195	1.63184	1.57521	1.47334	1.02374
Arih1	29.026	28.8217	24.9394	36.4537	35.9749	9.04368	35.0047	32.1153	31.8306	22.3477	25.6555	25.7013	25.3904	25.6195	23.2313	24.846	25.4401	30.9564	27.6605	29.7284	1.13138	1.12141	0.982236	1.42289	1.54855	0.363989	1.37596	1.03744	1.15076	0.751729
Arl1	82.0434	128.527	104.06	41.3486	67.8158	92.3116	108.687	109.916	87.7391	86.7888	73.8526	84.8784	64.2606	65.2825	65.5321	79.2911	69.2867	65.5666	86.9813	79.2871	1.11091	1.51425	1.61934	0.633379	1.03485	1.16421	1.56866	1.6764	1.00871	1.09461
Arl11	88.0002	91.9202	70.3177	57.6559	12.3398	4.53317	1.62867	3.79667	20.6317	5.89571	38.4804	40.9587	29.035	27.196	13.6187	11.238	1.81963	2.83528	4.71284	4.41224	2.28689	2.24422	2.42183	2.12001	0.906088	0.403377	0.895057	1.33908	4.37776	1.33622
Arl14ep	48.7774	26.0127	22.8432	24.8194	29.4637	16.6707	11.1108	12.7481	8.79684	11.7834	12.5038	15.2758	8.80127	9.15132	9.08465	11.1216	7.68085	10.6011	9.96617	10.6775	3.90101	1.70287	2.59545	2.71212	3.24323	1.49894	1.44656	1.20253	0.88267	1.10357
Arl2	38.1522	68.1828	38.7124	30.9786	54.6874	61.1439	40.2741	34.7496	13.2515	14.9104	11.9592	11.0563	11.3642	10.5902	8.88826	7.9779	8.83559	9.31549	9.66692	7.29548	3.1902	6.16687	3.40652	2.92521	6.15277	7.66416	4.55816	3.7303	1.37081	2.04378
Arl3	38.6467	34.9303	27.2321	14.067	28.0996	36.4983	11.1262	11.1158	23.4908	14.3844	9.53992	14.0223	10.1833	9.43279	9.28931	8.88945	7.81361	11.3519	9.71805	10.9396	4.05105	2.49105	2.6742	1.49128	3.02494	4.1058	1.42395	0.979204	2.41724	1.3149
Arl4a	11.6134	5.00973	6.87395	34.1423	2.89507	7.97656	23.8817	17.5366	12.1012	27.232	10.1019	9.35772	6.12015	6.25271	5.0246	4.99565	12.0388	12.2805	6.15265	5.87528	1.14962	0.535358	1.12317	5.4604	0.576179	1.5967	1.98373	1.42801	1.96682	4.63501
Arl5c	5.82249	2.42198	40.9866	93.5353	148.594	95.6042	84.5916	66.8833	68.2542	41.6905	3.54186	4.81505	54.3307	48.9979	89.5262	78.1911	56.4169	56.7835	43.3785	38.7601	1.64391	0.503001	0.754391	1.90897	1.65979	1.2227	1.4994	1.17787	1.57346	1.0756
Arl6ip1	517.854	531.774	443.843	399.237	312.031	437.782	494.393	527.586	691.201	604.79	186.595	200.264	160.051	163.562	159.593	176.376	221.686	223.077	272.043	259.768	2.77529	2.65537	2.77313	2.44089	1.95517	2.48209	2.23015	2.36504	2.54078	2.3282
Arl6ip5	282.445	363.737	269.467	303.097	278.205	213.986	162.176	137.313	158.28	107.306	89.496	90.8883	83.9568	80.204	79.3737	83.2332	60.9211	61.1909	65.4799	58.9238	3.15595	4.00202	3.20959	3.77908	3.50501	2.57092	2.66207	2.24401	2.41724	1.8211
Arl6ip6	30.9633	20.9893	36.6543	92.7631	39.237	18.6085	6.79176	7.42154	2.68865	4.60985	29.2385	25.4599	26.4862	25.7101	16.4879	19.9789	7.34146	9.3792	5.52745	6.66674	1.05899	0.824403	1.3839	3.60804	2.37974	0.931408	0.925124	0.791276	0.486418	0.691469
Arl8a	221.64	226.404	179.346	131.499	184.115	186.436	112.676	111.662	131.553	127.58	36.8043	38.1038	38.6181	43.866	43.2783	52.9508	29.6559	34.2797	40.9316	42.8278	6.02213	5.94177	4.6441	2.99774	4.25422	3.52093	3.79944	3.25739	3.21399	2.97891
Arl8b	412.419	256.747	322.397	334.049	252.569	195.107	162.004	141.621	111.82	121.941	94.3851	94.3225	91.8446	87.3694	72.5508	79.4261	45.6672	53.3317	40.3499	36.7258	4.36953	2.72201	3.51024	3.82341	3.48127	2.45646	3.54748	2.65547	2.77127	3.32031
Armc1	26.6847	21.4345	28.0102	2.08686	21.6768	11.3761	14.3051	19.6512	12.9439	1.84943	15.3807	15.3946	13.8518	11.9495	11.3922	10.0192	7.8542	9.39571	7.20111	6.06001	1.73495	1.39234	2.02214	0.17464	1.90278	1.13543	1.82134	2.0915	1.79749	0.305186
Armc10	23.7305	16.922	9.67456	0.640703	19.0148	19.6462	10.6661	7.13021	11.922	7.23953	21.9669	24.7463	15.8167	15.6605	12.3544	13.3296	9.54737	10.7964	8.82882	8.54465	1.08028	0.683818	0.611669	0.0409121	1.53911	1.47388	1.11718	0.660423	1.35035	0.847259
Armc5	6.41324	5.5674	7.21474	13.0692	10.7915	10.5574	7.9473	5.77445	5.8836	9.52735	8.61366	6.35012	5.52	7.76458	6.3197	6.25215	6.53133	7.5326	7.93379	6.8467	0.744543	0.876739	1.30702	1.68319	1.7076	1.6886	1.2168	0.766594	0.741588	1.39152
Armc8	12.7726	18.8907	17.3784	4.97419	14.7624	8.37399	47.9942	48.0925	33.5751	20.0316	13.3487	14.1573	11.8924	10.9779	13.0618	13.9543	36.2449	41.3822	23.9713	24.4203	0.956844	1.33434	1.4613	0.453108	1.1302	0.600102	1.32417	1.16215	1.40064	0.820284
Arnt	17.7571	13.9366	13.7683	23.8085	11.8391	8.28428	15.6259	15.8281	16.4955	12.7945	7.83326	8.50388	7.39261	7.5979	5.61986	6.02608	7.69814	8.1873	7.22349	8.36293	2.26688	1.63885	1.86245	3.13356	2.10665	1.37474	2.02983	1.93325	2.28359	1.5299
Arpc1b	259.74	317.548	206.167	185.272	224.014	269.758	264.393	265.695	297.932	298.565	884.631	728.786	766.642	686.325	684.376	620.262	463.827	513.638	476.729	416.664	0.293613	0.435722	0.268922	0.269949	0.327325	0.43491	0.570026	0.517281	0.624951	0.716559
Arpc2	1167.22	1068.35	1029.04	1012.38	708.272	834.13	683.432	748.631	704.498	828.252	441.011	437.605	422.473	408.428	342.768	343.509	277.425	351.271	350.225	378.444	2.64669	2.44136	2.43576	2.47873	2.06633	2.42826	2.46348	2.13121	2.01156	2.18857
Arpc3	1364	1249.46	1321.53	765.05	980.599	1100.43	814.334	993.779	777.127	778.97	457.885	480.868	399.685	430.114	352.183	391.439	336.412	453.063	379.916	388.575	2.97892	2.59835	3.30642	1.77871	2.78435	2.81123	2.42064	2.19347	2.04552	2.00469
Arpc4	2269.96	2081.3	1836.8	1915.88	1194.24	1587.47	1035.93	1275.63	1306.9	1250.32	663.286	661.132	586.011	574.94	479.676	511.711	363.614	414.46	446.905	417.951	3.42229	3.14808	3.13442	3.33231	2.48968	3.10228	2.84897	3.07782	2.92434	2.99155
Arpc5	333.963	364.72	319.653	320.14	309.945	325.891	363.841	337.559	302.697	407.409	259.7	230.186	228.613	227.336	241.659	245.479	268.589	316.143	358.569	378.607	1.28596	1.58446	1.39823	1.40822	1.28257	1.32757	1.35464	1.06774	0.844181	1.07608
Arpc5l	49.264	63.1257	28.4411	35.9582	35.2546	66.9439	16.9775	23.0867	7.96549	39.2648	46.5464	38.5788	26.4483	25.3533	20.014	25.6217	11.3809	12.3779	11.3574	10.7733	1.05838	1.63628	1.07535	1.41828	1.7615	2.61278	1.49176	1.86515	0.701347	3.64462
Arpp19	294.783	252.322	210.202	319.358	162.739	102.231	96.2268	73.6047	70.7446	53.65	105.099	100.996	89.7467	85.1801	71.379	86.8664	49.531	55.9157	41.623	45.0103	2.80482	2.49834	2.34217	3.74922	2.27993	1.17688	1.94276	1.31635	1.69965	1.19195
Arrb1	68.6776	63.7148	34.2095	60.8864	12.9571	23.1565	9.24403	8.88906	1.46377	2.19601	35.5353	35.7052	31.2214	29.366	20.8828	20.5959	5.73197	7.21069	1.55318	1.6498	1.93266	1.78447	1.09571	2.07337	0.620467	1.12433	1.61272	1.23276	0.942435	1.33108
Arrb2	183.944	127.782	128.672	141.398	64.2663	91.8838	23.1542	26.4535	40.6572	39.2114	90.4196	78.8754	82.3771	86.2716	57.5703	56.597	20.5312	26.4627	30.7826	32.4797	2.03433	1.62006	1.56198	1.63899	1.11631	1.62348	1.12775	0.999652	1.32078	1.20726
Arrdc1	45.502	26.2328	20.5032	11.7679	22.4996	30.533	12.1887	8.91159	21.0552	9.9276	15.5181	16.0342	14.1365	12.4942	9.98284	10.7685	7.1605	8.63592	8.56415	6.18223	2.93219	1.63605	1.45038	0.941864	2.25383	2.8354	1.70222	1.03192	2.45852	1.60583
Arsa	48.6284	36.6232	23.7623	18.5744	25.5528	9.49263	21.4103	18.5509	25.2021	24.6917	11.9678	12.3737	10.5029	12.2696	10.0171	11.7665	9.3735	9.08338	10.1342	9.17697	4.06327	2.95976	2.26246	1.51386	2.55092	0.806754	2.28413	2.04229	2.48684	2.69062
Arsb	58.6732	45.1818	54.9836	30.4257	42.157	53.5797	34.2821	42.3642	31.832	39.7151	13.9021	13.4799	12.0493	14.4113	14.5243	16.5045	13.3313	12.5946	11.309	12.4979	4.22047	3.35181	4.56323	2.11124	2.9025	3.24637	2.57154	3.36368	2.81474	3.17773
Arsk	12.5718	25.0499	23.0325	10.208	19.3263	17.2697	14.9945	13.8613	7.64159	16.3775	10.7878	12.3515	9.88987	10.1682	9.25143	10.7032	8.08747	7.01628	6.7087	5.96266	1.16537	2.02809	2.32889	1.00392	2.08901	1.61351	1.85405	1.97559	1.13906	2.74667
Asah1	795.435	706.897	627.998	630.846	438.733	570.144	428.419	397	370.808	444.575	205.687	254.644	214.59	223.012	172.714	199.034	172.445	155.317	166.136	157.488	3.86721	2.77603	2.92651	2.82875	2.54024	2.86455	2.48438	2.55606	2.23196	2.82291
Asah2	6.87665	9.34421	2.87827	5.71844	10.2213	5.84492	12.8543	10.4582	17.7346	21.5958	5.74723	6.05864	6.06221	5.57585	6.62559	6.01785	13.3945	12.9356	16.2517	16.3541	1.19651	1.54229	0.474788	1.02557	1.5427	0.971265	0.959669	0.808478	1.09124	1.32051
Asap1	29.6847	35.9441	29.4883	29.2931	26.0554	37.295	36.0669	48.8333	11.6879	4.6683	18.8185	20.5412	22.4997	21.7556	26.1315	26.6108	23.5027	31.4161	5.46101	6.22734	1.57742	1.74986	1.31061	1.34646	0.997089	1.4015	1.53459	1.5544	2.14024	0.749646
Asb6	6.81273	21.2971	12.7258	4.21385	45.8548	29.6708	16.9644	14.83	18.8766	26.7633	10.549	8.39184	6.38582	6.64244	13.2331	14.2367	8.05266	9.27116	14.6049	13.0171	0.64582	2.53783	1.99282	0.634383	3.46515	2.08411	2.10669	1.59958	1.29248	2.05602
Asb8	5.38631	19.9159	12.2971	0.678654	26.6869	20.8099	14.6208	12.2003	4.20941	29.3202	13.6759	10.0508	6.57183	7.19204	8.60462	8.54391	10.3802	12.1034	11.9573	11.1675	0.393852	1.98152	1.87119	0.0943617	3.10146	2.43564	1.40853	1.008	0.352038	2.62549
Ascc1	31.3845	15.3826	17.2187	14.8977	4.09383	11.2794	14.5888	13.2256	22.2455	4.03416	9.03417	8.5895	7.60076	6.64901	5.10112	7.41741	5.46932	5.64378	4.50145	4.06502	3.47398	1.79087	2.26539	2.24059	0.802535	1.52067	2.66739	2.3434	4.94184	0.99241
Ascc2	24.2843	26.5526	13.9925	29.3734	8.56177	17.9602	16.6936	14.3687	20.3338	17.0831	11.5609	9.95298	7.54742	8.62938	6.68507	6.60351	6.1634	7.29109	6.40083	6.78371	2.10055	2.6678	1.85395	3.40388	1.28073	2.7198	2.70851	1.97073	3.17675	2.51826
Ascc3	8.02069	8.50445	10.7715	12.3944	12.0408	9.56977	21.044	21.297	28.4833	27.263	12.0292	13.4909	14.1561	13.2905	12.1064	12.1201	27.3766	28.7535	36.1956	39.2143	0.666771	0.630383	0.760907	0.932579	0.994581	0.789577	0.768687	0.740675	0.786927	0.695232
Asf1b	136.098	154.528	112.366	39.7959	58.333	39.684	32.3173	37.3912	9.03064	5.16119	50.3936	37.6527	35.4789	27.7896	30.5101	25.0609	12.0425	15.0196	5.19039	4.33231	2.7007	4.10402	3.16714	1.43204	1.91192	1.5835	2.68359	2.4895	1.73988	1.19133
Ash1l	4.45571	2.71353	2.92544	7.66149	3.38126	2.83534	1.87566	2.14853	2.66282	1.88768	7.57907	8.99238	7.61188	8.07751	7.17906	7.3285	4.45707	4.94119	3.84426	4.63858	0.587897	0.301759	0.384326	0.948497	0.47099	0.386893	0.420828	0.434821	0.692673	0.406953
Ash2l	26.6961	18.2766	19.6812	44.1473	11.2303	27.0742	15.7488	21.5958	15.6473	12.7853	20.8288	21.9178	18.1927	16.1161	16.5757	14.2649	12.9791	14.7006	11.0038	11.0563	1.28169	0.833869	1.08182	2.73933	0.677517	1.89796	1.2134	1.46904	1.42198	1.15638
Asl	43.2529	34.5818	41.4656	48.8349	31.192	26.9107	27.238	30.1726	31.6073	38.1041	18.0062	16.2944	15.8695	14.0089	13.4043	14.5887	13.966	14.6735	13.5665	11.9889	2.40211	2.12231	2.61291	3.486	2.32702	1.84463	1.95031	2.05627	2.3298	3.17829
Asna1	71.5542	59.9421	62.9621	51.276	57.2753	59.8973	38.6253	53.0601	43.6873	35.2051	42.0288	34.2808	32.5851	26.1971	29.2467	26.7522	29.4433	33.4358	29.3973	24.9681	1.70251	1.74856	1.93224	1.95731	1.95835	2.23897	1.31185	1.58692	1.4861	1.41
Asns	34.6711	26.9213	30.255	38.0927	41.2275	39.6496	44.6608	52.3547	22.7602	33.9135	16.1879	14.0861	22.021	15.2025	27.0935	26.6219	28.1718	30.98	21.2994	22.0257	2.1418	1.91119	1.37392	2.50568	1.52167	1.48936	1.5853	1.68995	1.06859	1.53973
Asph	159.227	173.503	138.561	96.4568	124.206	108.368	125.162	127.839	215.909	212.646	66.1157	85.4142	68.7139	74.9415	54.1507	62.2565	75.2327	80.8415	119.922	128.29	2.4083	2.03132	2.01649	1.28709	2.2937	1.74066	1.66366	1.58136	1.8004	1.65755
Aspscr1	28.0567	12.5098	15.909	7.90185	22.834	19.5539	13.4397	13.8849	5.15914	4.69926	14.6664	11.1986	12.9894	11.3028	10.6559	9.85041	8.73627	9.70768	7.09945	6.8212	1.913	1.11708	1.22476	0.699107	2.14285	1.98509	1.53838	1.4303	0.726696	0.688919
Asxl1	13.4794	7.94921	11.167	20.7672	6.89065	4.87816	3.34734	2.76055	6.80056	2.91499	11.1374	11.4619	10.3797	9.54671	15.1449	13.9546	4.57244	4.94765	5.47386	6.36769	1.21028	0.693532	1.07585	2.17533	0.454981	0.349573	0.732068	0.557951	1.24237	0.457778
Asxl2	12.3903	9.09525	7.21054	3.16817	0.204402	5.35014	3.64204	3.89132	2.13596	2.38045	12.7803	13.7933	9.37478	8.82926	4.3844	4.92325	3.65311	4.60618	3.39964	4.17038	0.969483	0.659396	0.769142	0.358826	0.0466203	1.08671	0.99697	0.844804	0.62829	0.5708
Atad1	128.822	121.342	102.417	81.065	88.4027	112.887	222.702	186.764	155.231	219.142	37.6115	41.3405	37.2504	37.291	39.3049	43.8829	78.7511	75.662	69.7491	70.1588	3.42508	2.93519	2.74942	2.17385	2.24915	2.57246	2.82792	2.4684	2.22556	3.12351
Atad3a	27.2749	18.7872	13.0565	27.6031	16.5321	22.7748	10.2587	13.9501	6.18833	9.94712	12.9847	12.9009	11.6572	10.8858	13.0451	13.9798	8.66705	11.0773	3.73916	4.09545	2.10055	1.45627	1.12004	2.53569	1.2673	1.62912	1.18364	1.25934	1.65501	2.42882
Atad5	4.81756	3.30064	4.09755	2.99926	3.4969	3.72252	0.314687	0.82528	0.3322	0.355985	4.73686	6.32753	3.90075	3.84493	2.16451	2.2171	0.717229	0.835784	0.389209	0.414739	1.01704	0.521631	1.05045	0.780057	1.61556	1.679	0.438754	0.987433	0.853526	0.858334
Ate1	38.2641	26.8815	25.2369	6.17104	23.7515	7.4902	13.4081	11.8862	9.5691	17.4322	18.5131	19.8299	18.727	15.822	11.8179	13.4148	8.7096	9.02812	6.76907	7.40446	2.06686	1.35561	1.34762	0.390028	2.0098	0.558355	1.53946	1.31658	1.41365	2.35429
Atf3	124.528	143.69	328.964	226.154	225.6	192.446	440.28	497.433	271.822	307.827	69.808	78.6705	168.245	191.615	128.192	130.917	271.913	371.774	216.839	241.137	1.78387	1.82648	1.95527	1.18025	1.75985	1.46998	1.61919	1.338	1.25357	1.27657
Atf4	31.805	32.4081	54.0368	27.9579	49.7841	39.4353	29.021	21.5402	27.7458	29.3608	109.08	108.737	209.495	198.176	183.073	178.196	94.9582	114.498	121.327	128.125	0.291575	0.298042	0.257938	0.141076	0.271936	0.221304	0.305618	0.188128	0.228686	0.229158
Atf6	111.268	133.526	97.6338	147.876	84.6196	86.5883	62.1453	58.1701	55.7013	47.5526	56.4688	60.5545	53.1164	50.3221	41.8282	45.1913	42.3664	39.8435	38.2942	37.0081	1.97043	2.20506	1.83811	2.9386	2.02303	1.91604	1.46685	1.45996	1.45456	1.28493
Atf6b	41.2232	55.5255	40.6147	44.5197	36.3345	45.7888	24.6593	32.1565	50.0498	32.5499	25.8162	21.5173	21.1002	24.66	20.5426	26.035	21.5899	22.495	27.0876	25.7962	1.5968	2.5805	1.92485	1.80534	1.76874	1.75874	1.14217	1.4295	1.8477	1.26181
Atf7	8.0626	10.7321	16.362	7.31417	5.12526	11.2139	4.57605	11.827	8.82131	9.45291	6.65312	5.06052	4.43366	4.37568	4.72267	4.422	3.60104	5.08881	4.51292	4.7199	1.21185	2.12076	3.6904	1.67155	1.08525	2.53594	1.27076	2.32412	1.95468	2.00278
Atf7ip	10.2952	8.12578	8.28682	10.4771	3.33148	1.07088	3.44437	3.58758	1.39253	4.27775	4.0634	4.09322	2.93957	3.06998	1.77908	1.91624	1.57204	1.76646	1.72386	2.11682	2.53365	1.98518	2.81906	3.41275	1.87258	0.558845	2.19103	2.03094	0.807801	2.02084
Atg10	16.0258	12.3069	16.8865	55.9159	6.22301	3.81017	8.66978	11.169	2.89019	23.5382	11.0854	11.214	11.3124	9.15934	8.49269	8.94855	4.16001	4.88837	3.38618	3.65841	1.44567	1.09746	1.49275	6.10479	0.732749	0.425787	2.08408	2.28481	0.853526	6.43398
Atg12	59.0308	55.2488	44.9232	1.39456	90.0184	28.5081	33.4583	32.2332	38.9244	34.2961	18.1496	23.0003	15.7868	15.6132	13.9979	14.8787	12.6333	14.7215	15.6795	19.1983	3.25246	2.40209	2.84561	0.0893195	6.43084	1.91604	2.64842	2.18953	2.48251	1.78641
Atg13	13.5889	9.94849	11.9959	1.64366	6.09756	14.7001	4.62754	3.86943	5.09747	3.00434	7.30302	6.4314	5.99675	5.82965	4.39591	4.95401	3.42576	3.58339	3.4932	3.9775	1.86072	1.54686	2.0004	0.281948	1.3871	2.96732	1.35081	1.07982	1.45925	0.755334
Atg16l1	2.50682	15.5255	9.22064	9.47547	4.21819	1.29134	14.5371	16.2231	13.7136	9.44707	11.8457	11.8803	7.28025	6.50548	6.59097	8.45824	18.3702	19.5705	15.7422	17.3587	0.211622	1.30683	1.26653	1.45654	0.639996	0.152673	0.791341	0.828956	0.871136	0.544228
Atg16l2	0.417577	2.31599	2.54225	17.0466	3.74748	0.967982	2.47307	3.78334	1.95802	0.209822	3.62248	3.79858	4.69301	4.15478	4.71125	4.95095	1.59565	1.55237	0.973885	0.61113	0.115274	0.609698	0.54171	4.1029	0.795433	0.195514	1.54988	2.43713	2.01053	0.343334
Atg2a	3.9311	6.54086	6.91166	6.45602	9.80818	3.03755	3.81337	2.98267	2.22467	2.17961	5.22002	4.622	5.82828	6.48095	4.08737	4.97464	3.09445	3.44692	2.42378	2.5129	0.753081	1.41516	1.18588	0.996153	2.39963	0.610606	1.23233	0.865314	0.917849	0.867369
Atg2b	2.50019	2.77334	2.85402	4.06369	4.34729	2.80125	2.40617	1.53712	0.586171	0.125628	4.68168	4.42148	4.6144	3.99797	3.02051	3.36764	1.76806	1.735	0.978316	1.19936	0.534037	0.627244	0.618503	1.01644	1.43926	0.831814	1.36091	0.885947	0.599164	0.104746
Atg3	44.8801	65.4558	31.6244	89.8472	35.4288	37.8897	38.7623	36.0367	54.5593	50.9487	29.4551	29.1842	27.1649	26.3116	24.0646	27.1488	26.7679	32.9983	33.3395	37.4026	1.52368	2.24285	1.16416	3.41474	1.47224	1.39563	1.44809	1.09208	1.63648	1.36217
Atg4b	21.2126	29.7803	18.6654	33.0748	17.8471	16.9032	13.25	19.7339	23.3124	25.6477	18.3739	17.458	13.3964	10.7928	12.6415	12.4042	12.6653	11.5004	12.8492	11.6958	1.1545	1.70583	1.39331	3.06451	1.41179	1.3627	1.04617	1.71594	1.81431	2.19291
Atg7	18.2436	21.4758	26.9173	20.8284	16.0801	21.0014	14.884	10.6018	8.72904	9.7282	12.6437	13.3581	12.0541	12.2681	11.1893	11.2311	7.37222	8.17557	5.42226	5.53976	1.4429	1.6077	2.23305	1.69777	1.4371	1.86993	2.01893	1.29676	1.60985	1.75607
Atg9a	10.8081	6.85081	13.3952	22.8779	8.31393	7.87418	13.145	11.1913	21.7197	19.3957	10.8461	8.30943	9.77482	11.3723	11.6545	12.0549	11.846	12.1382	18.053	16.4832	0.996494	0.824462	1.37038	2.01173	0.713365	0.653195	1.10965	0.921992	1.20311	1.1767
Atic	76.4152	72.5849	58.8213	28.22	55.9164	55.6524	37.7136	54.5685	33.9778	25.5978	33.4981	33.692	30.429	24.4584	25.3881	24.4407	21.4019	25.0338	14.2711	12.9438	2.28118	2.15437	1.93307	1.1538	2.20247	2.27703	1.76216	2.17979	2.38089	1.9776
Atl2	47.8364	32.1168	29.6981	21.8882	30.0086	24.8041	10.4842	10.1835	4.42707	4.11151	16.181	16.6566	17.9119	18.5845	16.2767	16.6515	6.74696	6.83262	2.83807	3.30087	2.95632	1.92817	1.65801	1.17777	1.84366	1.4896	1.55392	1.49042	1.55989	1.24558
Atl3	102.258	112.098	110.701	79.4821	91.0158	111.659	89.2072	72.0802	56.2779	78.1584	42.5106	46.848	39.006	36.2596	34.7517	34.2685	35.5702	32.411	34.4857	33.3154	2.40546	2.39281	2.83805	2.19203	2.61903	3.25835	2.50792	2.22394	1.63192	2.34601
Atm	7.27667	6.56996	7.98451	5.18117	5.0781	4.11893	9.6777	9.19929	5.15773	7.78035	8.42324	9.5916	9.18652	8.26018	6.64015	6.54467	10.2833	11.0261	6.94621	7.09968	0.86388	0.68497	0.869154	0.627246	0.764757	0.629356	0.941108	0.834316	0.742524	1.09587
Atn1	5.49584	6.94975	5.35348	7.14613	8.75458	6.45487	1.62743	1.70721	3.60781	2.5406	3.00012	1.88789	2.17597	2.35772	2.2388	2.14543	0.709116	1.22042	0.786143	1.14393	1.83187	3.68122	2.46027	3.03094	3.91039	3.00866	2.29502	1.39886	4.58925	2.22094
Atox1	1230.54	1049.33	918.901	715.139	731.189	710.157	479.685	507.677	486.846	423.16	287.215	239.241	262.082	256.151	242.269	237.891	154.957	179.936	152.065	131.004	4.2844	4.38609	3.50616	2.79186	3.01809	2.98523	3.09559	2.82144	3.20156	3.23012
Atp10a	0.686596	0.761607	2.09003	1.81668	0.962773	4.37688	7.49725	8.77564	11.2681	15.4386	2.52413	2.80623	2.84941	2.6616	3.39334	3.35036	27.6758	28.6898	41.18	41.5614	0.272013	0.271399	0.733496	0.68255	0.283725	1.30639	0.270896	0.30588	0.27363	0.371464
Atp11a	17.1408	14.9572	11.653	20.7328	18.0747	13.7744	24.3636	22.0377	30.5418	17.3404	19.8987	20.4265	21.2787	19.0333	26.4468	28.6454	48.8148	45.9932	40.3908	38.3534	0.861403	0.732245	0.547634	1.0893	0.683436	0.480859	0.499103	0.479151	0.756159	0.452123
Atp11b	13.9327	10.058	10.4347	6.52032	6.94651	13.6708	13.3433	13.4535	11.4069	12.7793	17.173	17.8528	18.0369	17.5034	17.5764	17.7125	27.1632	25.6623	27.2906	27.5024	0.811315	0.563382	0.578521	0.372517	0.395218	0.771819	0.491227	0.52425	0.41798	0.464662
Atp11c	15.4219	22.5962	16.6409	10.9625	11.7486	19.7422	17.6365	13.2575	10.2534	15.6138	14.4402	15.477	17.064	15.853	15.2139	16.0031	11.7084	11.9684	8.66079	8.31876	1.06798	1.45999	0.97521	0.691514	0.772228	1.23365	1.50632	1.10771	1.18388	1.87694
Atp13a1	44.7671	43.7806	34.3975	39.2381	29.8405	35.2598	47.8706	45.0666	60.8444	59.4414	22.2158	19.1228	18.8423	17.8431	19.2608	22.0655	40.5042	37.6909	48.1629	44.4782	2.0151	2.28944	1.82555	2.19906	1.54929	1.59796	1.18187	1.19569	1.26331	1.33642
Atp13a2	32.8661	32.0612	26.608	18.3261	17.7808	11.7072	10.0084	8.74918	7.65081	12.5322	62.2898	54.9964	49.0283	58.7483	36.2591	41.5861	22.9961	21.987	22.7839	21.1314	0.527631	0.58297	0.542706	0.311943	0.490381	0.281516	0.435222	0.397925	0.335799	0.593059
Atp13a3	24.1347	20.4248	20.1085	21.8629	17.2714	23.311	6.31506	10.3678	7.31689	5.43627	36.054	36.3706	42.8187	37.652	45.4312	39.0663	21.3729	20.3165	9.6185	9.60853	0.669405	0.561575	0.46962	0.580656	0.380168	0.596705	0.29547	0.510313	0.760709	0.565775
Atp1a1	426.053	379.853	257.223	225.786	321.665	380.778	317.662	281.964	286.16	306.522	171.085	173.415	176.135	173.374	165.747	168.073	187.532	173.388	168.903	153.037	2.4903	2.19042	1.46037	1.30231	1.94071	2.26556	1.69391	1.62621	1.69422	2.00293
Atp1a3	51.2556	48.6114	39.2012	25.9612	28.8929	35.8426	27.0356	31.6779	22.2313	23.5655	16.9181	14.9007	15.4052	14.8027	13.6895	14.4279	11.9677	12.8556	11.861	12.0647	3.02963	3.26235	2.54467	1.75382	2.11059	2.48426	2.25904	2.46414	1.87432	1.95327
Atp1b3	397.216	380.481	443.827	310.884	361.717	384.923	574.973	563.116	817.33	896.983	134.571	125.212	130.577	132.726	129.897	128.603	165.629	167.843	254.741	255.862	2.95172	3.03871	3.39898	2.3423	2.78466	2.99311	3.47145	3.35501	3.20847	3.50574
Atp2a2	143.311	142.3	121.536	128.618	126.355	137.22	103.335	101.746	90.2581	104.957	56.7823	56.1842	60.2579	55.8597	64.0295	58.3751	59.6319	57.0257	62.7018	60.088	2.52386	2.53273	2.01694	2.30252	1.97339	2.35067	1.73289	1.78422	1.43948	1.74673
Atp2a3	0.779168	3.60122	4.94131	6.87205	5.39007	5.21787	3.65319	2.01698	4.87137	4.56764	3.48955	3.4035	4.07045	3.60777	4.6677	4.60859	4.20182	4.49298	3.74208	3.516	0.223286	1.05809	1.21395	1.90479	1.15476	1.13221	0.869432	0.448919	1.30178	1.2991
Atp2b1	77.9305	77.1406	67.386	79.3007	127.441	125.848	130.24	106.226	59.2433	57.7235	39.4477	49.3312	46.9194	52.6136	77.2151	85.3772	87.4008	83.0141	50.9763	49.5419	1.97554	1.56373	1.43621	1.50723	1.65046	1.47402	1.49014	1.27962	1.16217	1.16515
Atp2c1	30.6113	28.2963	26.0997	39.4261	25.7547	28.2525	23.5009	26.9641	28.5744	31.19	36.9423	43.6517	39.7745	38.3098	45.5622	44.853	46.952	42.4712	43.996	43.0486	0.828625	0.648229	0.656192	1.02914	0.565264	0.629891	0.500531	0.63488	0.649477	0.72453
Atp5a1	378.724	407.607	324.285	284.178	309.293	390.186	405.616	443.721	411.502	413.14	238.163	237.874	229.65	209.577	215.962	230.024	280.545	311.2	292.624	271.048	1.59019	1.71354	1.41209	1.35596	1.43217	1.69628	1.44582	1.42584	1.40625	1.52423
Atp5b	470.035	482.786	444.983	455.007	456.904	463.935	460.087	479.594	407.935	462.755	303.127	308.64	320.701	290.732	297.435	314.594	345.292	366.363	364.978	333.789	1.55062	1.56424	1.38754	1.56504	1.53615	1.47471	1.33246	1.30907	1.1177	1.38637
Atp5c1	256.772	248.495	189.425	240.991	218.483	169.388	148.709	160.52	116.715	96.9852	154.672	156.397	139.399	119.965	110.222	112.778	96.9128	110.522	92.7923	87.2012	1.66011	1.58888	1.35887	2.00885	1.98221	1.50196	1.53446	1.45238	1.25781	1.1122
Atp5d	422.967	508.474	423.187	649.245	386.57	426.367	279.745	311.243	221.485	220.082	119.022	85.363	94.0844	88.7792	94.5366	87.4514	72.2403	96.6329	77.3364	80.2141	3.55369	5.95661	4.49795	7.31303	4.08911	4.87547	3.87242	3.22088	2.86392	2.74368
Atp5e	988.754	1208.13	748.635	914.424	653.12	915.258	408.718	435.249	329.482	284.98	465.669	342.268	358.628	351.19	335.751	370.811	243.596	265.452	235.152	199.756	2.1233	3.52977	2.0875	2.60379	1.94525	2.46826	1.67785	1.63966	1.40114	1.42664
Atp5f1	144.011	188.449	172.954	159.051	100.969	169.524	134.514	178.387	163.542	182.035	154.496	128.326	140.365	111.725	114.018	117.424	118.646	128.936	146.417	124.134	0.932138	1.46851	1.23217	1.42359	0.885556	1.44369	1.13374	1.38354	1.11696	1.46644
Atp5g1	179.841	188.878	157.245	105.583	111.603	150.79	94.1873	102.766	94.1959	72.1002	111.524	73.0234	95.4763	57.8493	78.5099	64.5019	57.3467	64.1072	50.0739	40.6778	1.61258	2.58654	1.64696	1.82513	1.42152	2.33775	1.64242	1.60304	1.88114	1.77247
Atp5g2	140.696	152.116	93.5178	161.563	115.876	86.6968	68.5592	71.4588	54.281	57.2726	61.0455	34.5543	38.3785	27.8458	32.5406	23.2704	26.2494	27.9841	27.6906	16.6524	2.30477	4.40222	2.43672	5.80207	3.56098	3.72563	2.61184	2.55355	1.96026	3.43931
Atp5g3	975.303	890.116	842.75	563.073	627.446	918.671	713.696	760.322	711.68	765.461	309.837	237.978	256.183	211.738	245.55	241.432	218.988	221.238	210.638	191.847	3.1478	3.74032	3.28963	2.65928	2.55527	3.80509	3.25907	3.43667	3.37869	3.98995
Atp5h	100.255	99.5493	102.137	206.59	48.07	102.456	53.8687	68.0204	18.9555	20.3127	142.329	104.613	121.71	82.8474	99.6142	75.5142	80.9684	73.4191	75.8442	60.8067	0.70439	0.951597	0.839187	2.49362	0.482562	1.35678	0.665305	0.926467	0.249927	0.334054
Atp5j	392.487	483.444	406.802	302.172	282.272	387	278.973	319.45	225.813	245.611	158.702	121.621	123.887	123.99	112.273	107.398	78.2688	98.3476	76.2496	83.8906	2.47312	3.97502	3.28364	2.43707	2.51415	3.6034	3.56429	3.24817	2.9615	2.92775
Atp5j2	636.185	615.005	619.887	341.603	451.879	532.926	388.44	363.615	243.943	237.509	271.102	239.037	222.227	190.342	202.727	198.054	164.496	183.311	158.542	140.313	2.34667	2.57284	2.78943	1.79468	2.229	2.69081	2.3614	1.9836	1.53867	1.69272
Atp5k	514.057	365.104	301.143	346.678	363.009	325.77	206.706	224.976	164.741	185.828	193.276	174.091	174.261	166.302	154.345	141.387	118.744	158.2	125.161	118.773	2.6597	2.0972	1.72811	2.08463	2.35193	2.3041	1.74077	1.4221	1.31623	1.56456
Atp5l	250.067	233.958	173.004	204.321	96.3415	195.178	130.897	192.892	112.519	93.9219	96.7354	70.7006	72.4027	62.6677	67.0848	56.8409	69.5703	52.7111	53.9358	37.9942	2.58506	3.30914	2.38947	3.26039	1.43612	3.43376	1.8815	3.65942	2.08617	2.472
Atp5o	234.816	194.674	160.083	210.799	125.534	168.211	140.788	142.465	111.826	91.5642	124.726	106.429	104.411	81.4658	84.7435	86.5088	99.5358	103.905	96.7884	85.218	1.88265	1.82914	1.53321	2.58758	1.48134	1.94444	1.41445	1.37111	1.15536	1.07447
Atp6ap1	948.933	722.773	742.625	761.015	624.368	712.016	530.296	525.603	503.302	582.147	183.762	187.406	173.723	169.37	164.363	170.162	170.593	158.196	166.221	161.099	5.16393	3.85672	4.27478	4.49321	3.79872	4.18434	3.10855	3.32249	3.02791	3.6136
Atp6ap2	457.376	430.749	461.643	375.514	381.062	397.016	309.739	321.942	255.894	375.695	143.668	144.012	149.897	144.106	145.375	142.649	140.866	119.133	138.11	123.727	3.18355	2.99106	3.07973	2.60582	2.62123	2.78316	2.19882	2.70237	1.85283	3.03648
Atp6v0a1	132.048	157.209	148.241	132.629	122.742	134.115	79.0365	79.7995	55.6233	52.2336	75.2318	81.121	82.8816	82.5515	75.8013	76.4163	47.9006	49.5309	32.0505	35.2803	1.75522	1.93796	1.78859	1.60662	1.61926	1.75505	1.65001	1.6111	1.73549	1.48053
Atp6v0a2	16.3809	15.9833	12.9278	12.6129	15.4835	13.8295	16.9551	18.061	19.9137	15.2425	14.0884	13.836	15.4511	12.9158	12.6602	12.0622	18.9982	18.7954	24.0386	23.1474	1.16272	1.1552	0.83669	0.976551	1.223	1.14651	0.892457	0.960926	0.828405	0.658498
Atp6v0b	564.102	677.993	529.101	490.945	574.954	703.509	464.269	477.138	483.638	563.055	513.391	447.382	463.203	471.329	511.349	506.744	446.39	412.981	472.13	409.111	1.09878	1.51547	1.14227	1.04162	1.12439	1.38829	1.04005	1.15535	1.02437	1.37629
Atp6v0c	662.516	525.191	509.276	552.702	410.077	564.926	412.434	432.001	415.774	559.031	153.984	93.4425	139.898	123.441	157.686	117.666	140.147	122.318	198.908	139.972	4.3025	5.62047	3.64035	4.47747	2.60059	4.80109	2.94287	3.53177	2.09028	3.99388
Atp6v0d1	175.297	175.168	154.23	149.295	138.151	177.745	116.905	113.924	147.4	163.157	71.3636	70.5306	66.0439	64.4658	57.2334	62.9382	51.4984	58.2938	68.0047	70.3618	2.4564	2.48357	2.33527	2.31588	2.41382	2.82412	2.27007	1.9543	2.16749	2.31882
Atp6v0d2	63.0513	37.4383	39.5153	3.92538	47.015	42.4147	18.1217	15.3616	6.95643	12.2999	24.4057	25.717	18.2794	18.2117	19.108	18.8461	10.6754	12.4277	7.76578	7.93096	2.58347	1.45578	2.16174	0.215542	2.46049	2.25059	1.69752	1.23608	0.895779	1.55088
Atp6v0e	702.083	823.441	884.771	857.004	715.335	1005.36	548.364	564.822	490.79	509.748	254.852	210.608	212.188	197.672	219.621	200.532	163.5	142.395	182.102	145.852	2.75486	3.90984	4.16975	4.33547	3.25714	5.01347	3.35391	3.96658	2.69514	3.49498
Atp6v1a	305.471	314.341	336.534	304.407	230.81	309.189	242.806	286.185	228.861	199.37	134.385	152.138	164.336	143.318	134.223	137.986	130.546	139.027	111.978	108.96	2.2731	2.06616	2.04784	2.124	1.71961	2.24072	1.85993	2.05849	2.04381	1.82975
Atp6v1b2	398.425	358.699	301.271	235.806	203.497	263.433	285.349	340.17	412.774	417.783	148.684	141.486	127.071	110.2	102.27	103.834	139.062	163.314	181.281	185.431	2.67968	2.53522	2.37088	2.1398	1.98979	2.53705	2.05195	2.08292	2.27698	2.25304
Atp6v1c1	215.386	182.212	182.585	169.525	133.043	125.348	81.2391	80.2809	81.4988	68.4973	108.09	123.79	122.283	117.492	100.515	104.727	58.7881	73.6183	54.4719	57.3304	1.99265	1.47195	1.49313	1.44287	1.32361	1.1969	1.3819	1.0905	1.49616	1.19478
Atp6v1d	90.8093	105.415	126.964	121.334	46.7888	84.0386	112.565	92.9355	155.964	152.805	41.5556	49.2362	41.4806	46.3226	32.8933	40.5391	50.5148	59.9289	73.0587	79.8435	2.18525	2.14101	3.06081	2.61934	1.42244	2.07303	2.22836	1.55076	2.13477	1.91381
Atp6v1e1	291.15	346.668	360.49	309.192	328.555	312.46	404.136	410.488	460.486	532.934	104.627	122.445	113.05	126.525	112.818	136.518	144.888	198.492	187.062	206.1	2.78273	2.83122	3.18876	2.44372	2.91227	2.28879	2.78931	2.06803	2.46167	2.5858
Atp6v1f	418.038	375.556	397.665	398.326	262.564	366.759	194.228	242.356	245.023	136.753	178.744	154.432	182.962	165.289	145.867	160.156	120.692	129.615	120.403	114.094	2.33875	2.43185	2.17349	2.40988	1.80002	2.29	1.60929	1.86981	2.03502	1.1986
Atp6v1g1	101.296	131.904	87.1427	96.5544	113.634	74.8683	82.3259	64.1297	82.6051	63.0702	137.682	111.506	125.332	111.828	115.429	120.598	90.8127	98.3466	110.248	95.162	0.735724	1.18294	0.695293	0.863422	0.984443	0.620808	0.906546	0.652078	0.749265	0.662766
Atp6v1h	122.395	125.538	134.826	49.8553	119.121	150.283	142.12	145.398	141.513	128.337	61.6681	64.35	68.7464	60.4098	60.4324	65.0913	68.3671	68.6469	70.0383	68.5928	1.98474	1.95087	1.9612	0.825284	1.97114	2.3088	2.07878	2.11805	2.0205	1.87099
Atp7a	21.8657	17.1322	27.4693	24.4014	29.2009	26.282	10.2776	12.6906	25.2252	21.5379	15.55	17.7512	20.4874	20.9889	17.1707	18.2378	9.7143	9.69427	17.0166	17.3479	1.40615	0.965128	1.34079	1.16258	1.70063	1.44107	1.05799	1.30908	1.48239	1.24153
Atp8a1	25.5035	30.5232	24.516	15.8976	16.438	19.7065	17.8866	17.3735	17.3085	21.3581	16.4015	18.4864	18.1303	15.7403	13.4243	13.6051	15.4541	13.9389	14.3308	16.4705	1.55495	1.65111	1.35221	1.00999	1.2245	1.44847	1.1574	1.2464	1.20778	1.29674
Atp8b2	0.436317	0.362989	0.664085	2.14399	5.75112	3.53998	2.90706	1.27065	2.04589	4.60399	6.18531	7.03605	7.31044	6.00444	4.72664	4.5045	8.81264	8.3481	12.0754	11.4674	0.0705407	0.0515899	0.0908406	0.357068	1.21675	0.785876	0.329874	0.152208	0.169426	0.401485
Atp8b4	60.2259	59.2086	36.7323	44.0501	52.439	56.9525	31.4673	26.5935	15.2924	13.5469	27.2109	32.5857	26.4753	27.9964	31.2598	36.7912	20.1553	19.2264	11.9783	12.0916	2.2133	1.81701	1.38742	1.57342	1.67752	1.54799	1.56124	1.38318	1.27668	1.12035
Atp9b	24.0408	30.1894	21.7473	15.2595	28.2409	26.2872	37.5258	35.96	36.1579	40.2283	21.1385	23.8776	22.309	22.1118	26.4036	28.3354	31.7847	30.803	32.8066	32.6301	1.1373	1.26434	0.974823	0.69011	1.06959	0.927715	1.18063	1.16742	1.10215	1.23286
Atpif1	588.903	665.49	677.846	777.239	543.641	519.508	353.314	354.118	212.856	176.312	316.44	315.619	256.542	260.472	207.754	265.793	158.302	241.309	148.41	163.396	1.86103	2.10852	2.64224	2.98397	2.61676	1.95456	2.23191	1.46749	1.43424	1.07905
Atr	6.9678	4.62654	7.02032	4.52559	7.59625	7.12811	4.61339	4.76332	1.84068	2.56421	6.26051	7.03575	7.85213	7.16484	7.75059	7.74125	5.91242	6.22653	3.10768	3.31139	1.11298	0.657576	0.894066	0.631639	0.980087	0.920796	0.780287	0.765003	0.592299	0.774362
Atraid	159.418	131.286	122.544	29.216	83.0945	79.6327	59.6048	61.4843	60.405	57.4478	79.0451	74.5731	67.0767	69.8096	60.1304	59.3544	38.7573	31.8473	28.3752	25.2687	2.0168	1.7605	1.82693	0.41851	1.38191	1.34165	1.5379	1.9306	2.12879	2.27347
Atrn	16.5305	16.0192	18.8007	5.905	6.11333	12.773	6.65668	7.52375	4.25887	5.47656	12.1839	12.8267	11.7997	11.0205	8.85083	9.12781	7.55435	7.06825	7.3528	6.52815	1.35674	1.24889	1.59332	0.535822	0.690706	1.39936	0.881172	1.06444	0.579217	0.838915
Atrx	8.78216	10.2635	10.8206	12.725	4.10491	4.20083	8.24292	8.25454	5.14745	3.62481	8.48346	12.683	8.56994	9.51753	6.8373	8.08678	6.03409	7.15673	4.74121	5.82712	1.03521	0.809233	1.26263	1.337	0.60037	0.519469	1.36606	1.1534	1.08568	0.622058
Atxn10	86.9142	90.6494	81.5345	88.02	66.8395	93.3459	73.6502	69.69	34.6026	58.5042	39.671	37.7287	36.4658	32.6683	33.3469	33.6839	29.4871	33.3542	24.3641	25.2889	2.19088	2.40266	2.23592	2.69436	2.00437	2.77124	2.49771	2.08939	1.42023	2.31343
Atxn2	8.87272	9.39471	11.0491	7.92713	6.89949	6.23266	6.34457	6.91657	7.56441	6.18084	3.41334	3.06585	2.70294	3.0617	2.67779	3.1553	2.26163	2.38892	2.25744	2.68069	2.59943	3.06431	4.08783	2.58912	2.57656	1.9753	2.8053	2.89528	3.35088	2.30569
Atxn2l	50.1363	45.1862	54.2508	48.3644	31.49	59.3209	32.6698	40.0507	26.9374	22.0432	19.7521	17.5912	20.6507	18.9462	20.2578	19.1026	12.3367	15.2215	11.0027	12.7069	2.53828	2.56868	2.62707	2.55272	1.55446	3.10538	2.64819	2.6312	2.44824	1.73474
Atxn3	44.7334	63.4493	43.53	29.3823	27.5588	21.5325	6.24323	12.3392	3.43861	2.21089	22.5762	25.3776	24.3471	24.8744	21.2335	23.0676	9.68041	9.88712	6.38514	5.69417	1.98144	2.50021	1.7879	1.18123	1.29789	0.933455	0.644935	1.24801	0.538534	0.388273
Atxn7l3b	85.2894	51.7384	50.7081	40.298	94.1821	37.0704	35.5162	60.3704	62.4879	41.5164	21.4296	22.889	18.9619	15.6703	21.8212	22.572	17.0626	22.7233	20.3058	18.8534	3.97998	2.2604	2.6742	2.57162	4.31607	1.64232	2.08153	2.65676	3.07734	2.20207
Auh	13.2693	12.8791	7.57356	31.3477	28.8404	8.97149	10.7442	13.4177	11.6662	8.75104	13.9502	11.5537	12.8265	12.431	8.19753	9.29773	7.77855	10.4825	9.19813	8.59729	0.951191	1.11472	0.590464	2.52174	3.51818	0.964912	1.38126	1.28001	1.26832	1.01788
Aup1	133.456	161.401	123.426	81.973	169.464	174.017	88.5066	92.3652	93.4321	116.886	184.425	158.709	155.95	157.719	155.456	162.581	116.453	129.592	119.697	120.226	0.723633	1.01696	0.791446	0.519742	1.09011	1.07034	0.760021	0.712738	0.780572	0.972223
Aurka	43.5632	19.329	29.3633	24.4643	20.9438	14.4262	5.52856	8.86043	4.37717	6.56681	10.7974	12.1141	11.8708	10.6551	8.88543	8.93462	2.99573	4.16441	2.51579	2.60587	4.03459	1.59558	2.47357	2.29602	2.3571	1.61464	1.84548	2.12765	1.73988	2.52
Aurkaip1	102.281	95.5037	62.0728	52.8531	55.9168	41.0168	41.6934	66.1922	57.6731	26.0221	75.4702	65.0646	57.1348	51.7786	55.8436	53.4655	43.6263	49.094	43.4813	40.2647	1.35525	1.46783	1.08643	1.02075	1.00131	0.767164	0.955694	1.34827	1.32639	0.646275
Aurkb	53.4356	47.1684	41.8107	15.3619	25.7505	16.2832	11.1432	11.6895	5.29352	2.26901	25.7176	24.5127	22.1936	17.5052	18.1848	15.6006	7.28311	10.0351	2.92545	2.78425	2.07779	1.92424	1.88391	0.877564	1.41604	1.04376	1.53001	1.16485	1.80947	0.814946
Avl9	10.0069	7.99214	10.9662	8.7754	1.79611	3.71152	11.1122	14.7654	3.7538	9.0508	8.681	10.3125	9.69878	9.15493	8.15289	8.20029	11.998	12.341	6.65923	6.67174	1.15274	0.774994	1.13068	0.958544	0.220304	0.452608	0.926177	1.19646	0.563699	1.35659
Axin1	7.76975	6.72252	4.96682	0.9398	1.04593	4.80293	2.41583	4.82713	2.91459	6.09039	12.9873	14.8674	12.0488	12.2687	10.7986	10.5532	7.32606	8.87336	8.15035	8.17459	0.598257	0.452166	0.412226	0.0766013	0.0968577	0.455116	0.329758	0.544002	0.357604	0.745039
Axl	44.7273	35.1837	26.6965	30.2768	26.3992	39.5302	75.854	71.1345	107.605	92.1006	52.2046	50.0617	46.6596	51.7326	54.3186	56.5177	123.139	123.936	167.66	155.448	0.856769	0.702806	0.572155	0.585256	0.486006	0.699431	0.616002	0.57396	0.641803	0.592487
Azi2	37.748	11.9634	19.1511	43.4843	40.329	25.0009	79.1773	84.9196	96.9289	71.3535	83.8626	88.9617	76.5443	79.4368	103.555	109.46	237.639	291.621	264.67	293.616	0.450117	0.134478	0.250197	0.547408	0.389445	0.228402	0.333183	0.291198	0.366226	0.243017
Azin1	104.294	79.0537	90.3926	71.8355	51.9984	94.4668	55.7622	62.2452	59.771	44.5443	98.4437	96.5321	119.722	97.2936	106.272	94.5405	64.3225	63.1268	56.8455	55.2127	1.05943	0.818937	0.755022	0.738338	0.489297	0.99922	0.866916	0.986035	1.05146	0.806776
B230219D22Rik	86.4918	45.6863	63.7318	68.4994	47.7429	64.7104	16.2616	19.5465	12.8749	8.27807	38.4889	35.1083	33.8315	30.779	30.0192	28.3472	13.3537	15.5156	7.1153	7.53465	2.24719	1.3013	1.8838	2.22552	1.59041	2.28278	1.21777	1.2598	1.80947	1.09867
B2m	10353.8	9519.57	8070.49	8759.86	7317.46	9962.52	10500.9	10165.3	13330	13730.4	2211.74	2304.28	1962.21	2432.02	2048.13	2475.52	3192.47	3531.69	4028.66	4211.92	4.68131	4.13126	4.11296	3.60188	3.57275	4.02441	3.28929	2.87832	3.30881	3.2599
B3galnt1	10.9084	48.8326	23.1253	53.013	14.8591	18.0618	13.5553	5.5467	12.7873	3.91512	21.9264	22.701	19.7631	16.0084	12.136	12.7574	7.65607	6.83602	3.99784	4.30789	0.497498	2.15112	1.17013	3.31156	1.22438	1.41579	1.77053	0.811394	3.19857	0.908825
B3gat3	27.8257	18.4337	18.2346	14.608	6.93659	8.36143	5.14985	7.00296	10.8729	11.263	37.2057	26.0596	27.973	26.0179	22.6888	23.3781	15.228	16.0913	18.4673	17.188	0.747887	0.707365	0.651866	0.561461	0.305728	0.357661	0.338183	0.435202	0.588766	0.655284
B3glct	9.04951	18.0097	18.6349	16.9018	15.2275	7.81519	7.09346	3.78948	8.73626	2.67479	7.99687	6.80646	6.80591	6.60341	4.94288	6.18264	4.04182	3.95791	2.51059	3.00805	1.13163	2.64597	2.73804	2.55956	3.0807	1.26405	1.75501	0.957444	3.47976	0.88921
B3gnt2	65.602	49.7136	43.4981	46.1564	95.8152	108.909	218.544	224.885	167.51	254.568	27.3485	32.9722	39.7136	41.1676	73.8005	74.8623	162.65	176.85	150.912	155.289	2.39874	1.50774	1.0953	1.12118	1.2983	1.4548	1.34365	1.27162	1.10998	1.63931
B3gnt3	64.5269	43.8695	26.929	66.0901	30.7445	30.5592	31.3326	21.1041	27.654	27.5422	18.5709	13.1971	13.3064	13.5829	13.2316	12.8712	11.1217	10.3176	10.9318	11.4801	3.47462	3.32418	2.02377	4.8657	2.32357	2.37422	2.81726	2.04545	2.52969	2.39912
B4galnt1	54.2224	89.0401	50.164	56.262	60.8263	46.8266	34.6314	41.2829	22.4338	23.5058	44.2035	34.8309	30.6941	33.2464	30.9965	29.4986	19.8911	21.3433	15.8694	14.7819	1.22665	2.55635	1.63432	1.69227	1.96236	1.58742	1.74105	1.93423	1.41365	1.59018
B4galt1	151.212	118.781	110.63	69.1765	92.8227	98.2872	27.6254	19.3197	48.6891	24.4572	58.0154	51.6048	53.2639	50.8188	39.4611	39.9907	12.0774	13.5751	15.8084	17.0699	2.60642	2.30173	2.07701	1.36124	2.35226	2.45775	2.28737	1.42317	3.07996	1.43277
B4galt5	53.5366	42.6834	123.754	199.833	190.306	242.001	204.855	193.588	346.74	310.704	36.3898	32.6517	76.5901	79.9013	123.944	135.586	147.453	146.981	215.868	219.657	1.4712	1.30723	1.6158	2.50099	1.53542	1.78485	1.38929	1.3171	1.60626	1.4145
B4galt6	114.887	60.7028	69.3233	69.3784	24.0218	41.4972	18.6206	18.9174	27.0946	26.985	65.3735	59.9802	67.0083	59.2496	46.5615	42.1094	20.1741	24.2276	33.1888	36.3691	1.75739	1.01205	1.03455	1.17095	0.515915	0.985463	0.922997	0.780821	0.816376	0.741976
B4galt7	49.695	43.8041	21.6106	0.670862	9.45717	17.8282	7.22648	5.74296	16.6443	4.01311	29.1971	26.5886	17.7507	19.3217	9.74627	10.7362	6.25349	6.07019	9.79632	8.22535	1.70205	1.64748	1.21745	0.0347206	0.970338	1.66057	1.15559	0.946091	1.69904	0.487895
B4gat1	27.3605	47.9387	25.0807	19.2737	37.6685	15.3756	11.5086	13.6824	13.121	9.99851	18.354	17.0885	15.5159	15.9497	11.3617	12.8896	7.83818	8.90776	5.44649	5.56146	1.49071	2.80532	1.61646	1.2084	3.31539	1.19287	1.46827	1.53601	2.40906	1.79782
BC003331	15.045	29.2051	39.5959	23.6951	33.4031	27.1255	23.6679	15.4161	20.5759	8.81965	16.447	20.9756	15.3832	16.1601	12.3927	15.1683	11.9459	11.8076	11.6311	10.8818	0.914754	1.39234	2.57398	1.46627	2.69538	1.7883	1.98125	1.30561	1.76904	0.810493
BC003965	32.3643	50.6825	17.3856	37.4196	21.3565	8.82628	11.9797	7.39229	26.7805	8.6094	23.1617	19.2559	13.5442	15.8671	14.6362	15.5086	8.69189	10.6634	6.70941	7.73948	1.39732	2.63206	1.28362	2.35831	1.45915	0.569121	1.37826	0.693242	3.99149	1.1124
BC004004	90.9335	65.7297	56.7226	36.6257	43.4791	39.1636	37.2458	27.0124	43.6873	34.0815	63.5557	58.6994	55.41	48.7826	46.6608	43.7654	39.7633	38.2387	36.737	34.3918	1.43077	1.11977	1.02369	0.750795	0.931811	0.894854	0.936688	0.706415	1.18919	0.990979
BC005537	26.0667	20.1145	19.8371	10.2813	8.2639	0.875726	7.5511	7.33448	15.9427	9.11155	584.265	553.693	470.692	398.847	332.68	285.016	137.851	169.598	125.346	140.11	0.0446145	0.0363279	0.0421446	0.0257775	0.0248404	0.00307255	0.0547771	0.0432463	0.127189	0.0650313
BC005624	14.4137	6.99494	27.4225	21.7928	6.56874	22.971	15.6723	12.8259	19.0086	23.9908	23.826	22.2923	21.1777	19.1488	15.6504	16.421	15.6918	18.7098	17.415	17.8719	0.604957	0.313783	1.29488	1.13808	0.419717	1.39888	0.998758	0.685521	1.09151	1.34238
BC017158	10.0454	19.1904	15.714	16.0319	23.7897	17.6802	3.30516	3.61164	2.61682	8.13214	9.91877	8.09426	7.59549	6.70652	5.4606	5.31141	3.3788	3.04288	2.89236	2.74519	1.01276	2.37087	2.06886	2.3905	4.35662	3.32871	0.978205	1.18691	0.904737	2.96232
BC017643	132.304	132.855	74.1891	34.7434	54.6803	55.9581	59.2826	69.3987	169.787	170.047	35.655	37.7406	17.6621	16.6461	14.1831	16.5121	31.5846	27.1985	55.7941	51.5212	3.71068	3.52022	4.20046	2.08718	3.85532	3.38891	1.87694	2.55156	3.0431	3.30053
BC028528	90.4121	122.904	93.0888	95.1531	79.548	86.2991	55.7769	51.6273	62.3446	58.7914	47.262	48.8307	42.5893	42.3788	36.6393	34.7454	26.4809	26.6255	32.1576	30.7016	1.913	2.51694	2.18573	2.2453	2.17111	2.48376	2.10631	1.93902	1.93872	1.91493
BC031181	382.856	290.467	321.593	38.2266	143.837	267.923	157.758	233.744	203.232	274.044	77.5676	91.675	69.2677	66.74	71.4028	73.7029	64.8855	70.1801	77.4976	76.5	4.93577	3.16844	4.64276	0.572769	2.01444	3.63517	2.43133	3.33063	2.62243	3.58227
BC037034	16.5405	16.86	20.7525	38.1887	10.0298	3.10885	12.7414	9.54713	19.9137	19.7672	16.4582	13.2236	10.2788	10.4556	6.78441	6.38199	6.89951	8.44251	12.7661	16.4472	1.005	1.27499	2.01896	3.65248	1.47835	0.487129	1.84672	1.13084	1.55989	1.20186
BC055324	9.21189	8.62169	11.1728	5.4406	2.42199	6.45069	1.7049	0.931493	2.02475	2.02507	8.16185	7.325	6.64868	4.87294	3.53529	3.06484	1.28573	1.54107	0.880256	0.947934	1.12865	1.17702	1.68045	1.11649	0.685091	2.10474	1.32601	0.604447	2.30018	2.1363
Babam1	35.8779	27.6853	27.3036	25.354	30.6232	19.2854	21.0752	15.1426	12.8002	33.3121	37.9562	32.4982	33.9367	32.6035	28.0345	26.3584	22.2173	26.7531	20.6965	20.9905	0.945246	0.851902	0.804542	0.777645	1.09234	0.731662	0.948594	0.566014	0.618473	1.58701
Bach1	16.0664	17.2406	29.7695	21.6513	19.0027	30.2266	20.1681	27.35	22.9282	19.6559	23.5742	26.973	37.9209	39.2421	35.8837	42.6222	31.5805	36.1139	31.2255	31.0105	0.681525	0.639179	0.785043	0.551736	0.529564	0.709175	0.638625	0.757327	0.734279	0.633847
Bag1	34.3364	18.6387	12.2313	27.6144	6.14655	32.7412	22.7152	14.1837	15.4153	1.83544	91.9728	97.8734	86.7757	78.7307	74.1821	71.7105	55.2887	68.1877	55.3179	56.3106	0.373332	0.190437	0.140953	0.350745	0.0828576	0.456575	0.410846	0.208009	0.278666	0.032595
Bag3	51.9169	35.7448	37.4658	14.8872	23.3462	24.208	22.3647	23.7506	32.5284	39.1303	8.28598	7.54476	6.13749	6.27482	5.80918	5.9201	2.97622	3.92665	5.63658	7.2415	6.26563	4.7377	6.10442	2.37252	4.01885	4.08911	7.51447	6.04857	5.77096	5.40362
Bag5	6.92181	12.1569	8.34034	23.5473	7.4413	17.8282	4.69721	4.8528	1.35235	6.37638	13.4251	12.806	13.1437	11.6274	11.6911	12.4218	4.95215	4.40309	4.24507	4.80714	0.515589	0.949312	0.634549	2.02515	0.636493	1.43524	0.948519	1.10213	0.318569	1.32644
Bag6	57.3294	54.3655	57.3157	59.8257	58.7633	64.6234	59.7504	66.3457	54.8178	65.6337	30.9435	24.8992	29.7639	28.4117	25.7691	25.1143	27.3458	33.0081	28.1043	26.761	1.85271	2.18343	1.92568	2.10567	2.28037	2.57317	2.185	2.00998	1.95051	2.45258
Bahd1	22.7531	18.3724	7.3845	10.877	8.07016	16.547	9.66061	8.87821	35.3016	33.9622	6.54874	5.02333	4.1055	4.34528	5.51234	6.23416	3.05533	4.46151	16.5786	16.9898	3.47442	3.65741	1.79868	2.50317	1.46402	2.65425	3.16189	1.98996	2.12935	1.99898
Baiap2	16.7325	19.1593	22.592	13.0574	16.9539	9.59262	4.79502	4.54103	3.7964	2.44093	9.70742	10.0261	10.4071	10.1132	7.38314	6.48666	2.54468	3.45134	2.37781	2.36984	1.72368	1.91094	2.17082	1.29113	2.2963	1.47882	1.88433	1.31573	1.59659	1.03
Bak1	99.4129	109.585	84.1656	95.8211	73.8825	131.548	122.353	119.826	151.498	139.867	65.6007	50.7501	42.5382	43.0337	42.9289	44.902	56.5499	75.2085	82.1792	73.5039	1.51542	2.1593	1.97859	2.22665	1.72104	2.92966	2.16362	1.59325	1.84351	1.90285
Banf1	271.256	365.599	261.921	337.363	233.946	376.377	147.91	166.108	184.634	99.6597	59.5538	35.6244	44.8097	41.8351	41.0617	40.228	38.9367	36.2885	24.489	22.5292	4.55481	10.2626	5.8452	8.0641	5.69743	9.3561	3.79873	4.57742	7.53948	4.42358
Bap1	9.27379	5.34131	10.5862	3.23574	8.00252	4.96096	3.82879	5.53995	1.6725	3.94294	20.1503	19.3318	18.9768	18.8738	20.3705	17.3762	13.4526	15.6999	15.0661	13.6593	0.460232	0.276296	0.557851	0.171441	0.392849	0.285503	0.284613	0.352866	0.111011	0.288663
Basp1	143.855	198.831	193.754	144.138	213.887	175.556	97.6215	109.352	112.423	92.9358	63.774	53.5994	43.9088	80.5504	48.5607	64.92	38.6976	62.5339	38.639	44.9752	2.2557	3.70958	4.41265	1.78942	4.40452	2.7042	2.52267	1.74868	2.90957	2.06638
Bax	143.739	118.83	163.049	334.19	118.652	106.875	99.885	88.634	130.348	113.107	145.896	119.472	126.953	127.124	115.488	116.918	94.4811	101.293	93.1902	80.5954	0.985212	0.994623	1.28432	2.62886	1.0274	0.914107	1.0572	0.875025	1.39873	1.40339
Baz1a	9.68255	7.03681	7.62264	11.6107	17.8846	19.3492	6.79726	9.6153	9.78482	7.13008	8.26538	10.0462	16.4726	16.6425	16.5346	17.5714	8.08577	9.04442	7.30235	8.30009	1.17146	0.700444	0.462746	0.697653	1.08164	1.10117	0.840645	1.06312	1.33995	0.859036
Baz1b	28.5171	33.3792	24.6309	3.17422	9.91109	15.5462	10.5556	8.15193	15.9968	19.0761	22.9691	24.4732	18.7783	16.6273	10.2187	10.6396	8.76028	10.1722	12.3496	13.2929	1.24154	1.36391	1.31167	0.190904	0.969901	1.46117	1.20494	0.801395	1.29533	1.43506
Baz2a	3.97925	3.27244	5.01229	6.2239	4.54086	3.92296	6.34881	7.63682	11.2596	8.41156	5.29848	5.42056	4.73954	4.50358	5.32934	5.06878	7.16355	8.25697	9.59342	10.3476	0.751017	0.603709	1.05755	1.38199	0.852049	0.773946	0.886266	0.924894	1.17368	0.812896
Baz2b	3.66031	3.24816	2.50699	3.505	3.62706	3.2997	5.46463	4.57968	1.43027	1.47137	3.94978	4.92079	4.50368	4.95047	5.92043	5.81592	4.56538	5.32808	2.83291	3.38279	0.926712	0.66009	0.556653	0.708013	0.612635	0.567355	1.19697	0.859536	0.504876	0.434956
Bbc3	9.39331	6.69828	9.19084	33.4767	10.5373	10.3688	8.44401	5.21054	3.14609	1.34854	4.68478	2.56089	1.93703	3.03445	3.75145	6.06099	2.53054	4.38999	2.5037	2.67308	2.00507	2.61561	4.7448	11.0322	2.80887	1.71075	3.33684	1.18691	1.25658	0.50449
Bbip1	93.2183	71.0892	73.8962	146.814	61.0001	21.0086	31.6295	17.5954	36.4251	13.6616	43.9672	45.7099	43.6521	37.8929	36.8412	34.4602	22.9375	34.077	27.3771	30.6328	2.12018	1.55522	1.69284	3.87445	1.65576	0.609649	1.37894	0.516341	1.3305	0.44598
Bbs7	5.08988	6.45252	4.70349	3.84783	4.07843	6.46126	2.82604	3.99981	0.852375	2.19217	3.57699	4.41735	3.07385	3.40595	2.28687	2.22858	1.40729	1.27949	0.923282	1.15284	1.42295	1.46072	1.53017	1.12974	1.78341	2.89927	2.00814	3.1261	0.923201	1.90154
Bbx	16.0542	11.1705	13.9945	5.51662	11.6243	9.24737	21.609	23.046	19.1617	8.21347	12.7844	15.6717	11.6774	12.5034	10.7541	11.4654	21.7138	27.5914	20.0296	23.3531	1.25576	0.712784	1.19843	0.441209	1.08092	0.806547	0.995172	0.835259	0.956671	0.351708
Bcap29	139.844	104.617	113.023	101.621	96.6793	102.193	56.5785	70.1559	25.4158	41.3981	19.9553	22.3433	17.5486	18.9107	17.859	18.0992	9.89876	11.7678	6.51733	8.63782	7.00786	4.68226	6.44057	5.37372	5.41346	5.6463	5.71572	5.96167	3.89973	4.79266
Bcap31	379.035	388.058	326.426	555.426	285.253	328.157	290.819	275.529	271.325	314.225	122.207	147.777	105.092	106.05	101.872	113.551	111.859	111.412	113.684	115.028	3.10159	2.62597	3.10609	5.23738	2.8001	2.88995	2.59987	2.47307	2.38665	2.73173
Bcar3	10.7308	4.90131	10.5681	9.30523	8.8513	4.14584	2.10284	1.22551	8.1395	1.74446	10.3507	9.91814	9.69748	7.70791	9.98928	8.01862	2.1771	3.23835	4.18748	4.73451	1.03672	0.494176	1.08978	1.20723	0.88608	0.517027	0.965889	0.378437	1.94377	0.368456
Bcas2	59.0115	48.7731	48.4308	26.2419	27.9073	38.4454	25.6979	20.967	13.564	7.55829	38.5596	42.1029	33.5244	33.9401	25.7627	26.0379	13.3793	16.4607	9.65497	10.5838	1.5304	1.15843	1.44464	0.773184	1.08324	1.47652	1.92072	1.27376	1.40487	0.714134
Bcat2	47.1122	48.1765	30.251	20.5903	10.7352	30.7155	29.7002	24.296	27.6137	24.4124	12.0709	10.9109	11.0814	11.462	9.62821	9.91528	8.95013	10.8005	10.1483	9.72594	3.90295	4.41547	2.72989	1.7964	1.11497	3.09779	3.31841	2.24952	2.72101	2.51003
Bckdha	27.3348	39.353	33.1949	55.3983	17.6155	11.6842	13.7777	15.0553	4.09063	12.5661	18.0277	16.6487	14.0921	16.6461	11.1491	13.369	10.7944	10.0322	6.96287	6.97485	1.51626	2.36373	2.35558	3.32801	1.57999	0.873983	1.27637	1.5007	0.587492	1.80163
Bckdk	49.8464	51.7927	29.2906	17.1719	23.3579	37.5411	14.2468	17.9668	13.3137	5.7068	61.7453	49.8916	50.6145	42.7227	42.3977	37.7612	22.0126	27.3661	16.0237	14.8775	0.807291	1.03811	0.5787	0.401938	0.550923	0.994172	0.647208	0.656533	0.830881	0.383587
Bcl10	46.6426	44.3472	66.7656	49.5329	71.0103	53.2029	41.9289	36.6534	39.0549	39.0612	41.5903	40.4797	67.7866	63.8579	66.6391	71.2091	44.3649	46.5696	45.0665	41.5803	1.12148	1.09554	0.984938	0.775674	1.0656	0.747135	0.945092	0.787067	0.866606	0.939415
Bcl2a1b	52.6318	60.8839	365.059	263.74	574.394	685.553	654.029	672.463	528.837	462.429	53.2942	55.1956	266.684	252.12	464.388	451.552	496.038	483.082	444.235	393.023	0.98757	1.10306	1.36888	1.04609	1.23688	1.51822	1.3185	1.39203	1.19044	1.17659
Bcl2l1	35.4863	46.1287	62.4502	27.6651	121.913	154.238	43.9211	43.7775	64.9982	73.5525	43.0558	48.3931	50.424	58.6077	99.9813	101.786	38.1926	48.0419	68.0488	71.5905	0.824193	0.953209	1.2385	0.472039	1.21936	1.51532	1.14999	0.911235	0.95517	1.02741
Bcl2l11	74.4308	84.1502	374.714	339.772	374.126	411.435	115.501	100.042	13.4233	35.9611	41.794	43.1595	214.291	228.422	280.394	265.529	62.5088	86.5581	25.6675	25.487	1.7809	1.94975	1.74862	1.48748	1.33429	1.54949	1.84775	1.15578	0.522969	1.41096
Bcl2l13	20.2776	17.5313	15.4315	5.41038	11.0391	15.6685	4.63593	5.78949	9.78784	7.19222	11.8618	12.5958	11.1303	10.057	8.09837	9.52441	5.8898	6.14894	5.44013	4.99459	1.70949	1.39184	1.38645	0.53797	1.36313	1.64508	0.787111	0.941543	1.79919	1.44
Bcl3	12.7375	12.8446	26.4366	43.3316	89.6301	148.528	69.6505	72.3152	48.8669	52.3658	4.47136	2.57815	9.37238	12.7184	44.8584	42.4016	30.4563	36.9638	27.5163	29.7276	2.84869	4.98211	2.82069	3.40701	1.99806	3.50289	2.2869	1.95638	1.77593	1.76152
Bcl6	66.5756	65.7338	37.0243	28.7597	11.2847	7.06631	84.4904	91.1413	35.1624	46.5026	26.5474	23.9912	14.8226	14.2276	5.98974	6.22531	33.7649	39.8538	22.807	23.3027	2.5078	2.73992	2.49783	2.02141	1.884	1.13509	2.50231	2.28689	1.54174	1.99559
Bcl7b	41.2232	62.8745	32.3517	36.0331	48.4116	40.8117	22.4114	18.3411	33.2227	32.365	21.8055	19.7496	17.7986	17.4784	15.3059	13.4034	11.3795	14.8781	17.626	18.8534	1.89049	3.18359	1.81766	2.06158	3.16293	3.04487	1.96946	1.23276	1.88487	1.71667
Bclaf1	33.7772	33.5646	33.8448	9.36275	24.1555	27.622	35.4242	38.0715	31.0164	23.4782	23.0185	30.6546	21.1282	24.6418	16.4126	22.0897	22.1821	26.7742	20.263	24.6938	1.46739	1.09493	1.60188	0.379954	1.47177	1.25045	1.59697	1.42195	1.53069	0.95077
Bcor	4.99351	6.96579	9.32758	14.5279	40.7395	55.5386	4.14479	4.7005	1.41907	0.760336	3.21768	3.84073	8.28467	7.66477	28.2675	32.2326	4.28032	4.54531	0.650922	0.756644	1.5519	1.81366	1.12589	1.89542	1.44122	1.72306	0.968337	1.03414	2.18009	1.00488
Bcorl1	3.33537	1.93031	1.8761	3.61775	4.14829	3.92187	1.55666	2.5339	3.05991	0.655801	1.41143	1.34684	1.13636	0.936929	2.38902	1.95329	1.00752	1.32261	0.751578	1.16728	2.36311	1.43321	1.65097	3.86128	1.73639	2.00783	1.54504	1.91583	4.07132	0.561819
Bcs1l	5.57852	3.09399	10.3775	5.15439	3.8243	11.9736	3.90036	3.20906	1.45321	0.934354	7.54101	6.38764	5.04885	4.08477	3.77509	3.84948	1.9994	2.48863	1.67047	1.81428	0.739758	0.484371	2.05541	1.26186	1.01304	3.11045	1.95077	1.28949	0.86994	0.515001
Bdp1	2.51976	1.22283	1.67787	2.85731	3.12109	2.67714	3.14783	3.32931	2.21534	1.37162	6.40882	7.9878	5.759	6.44409	7.49504	8.28173	7.46105	9.56514	5.83311	7.31564	0.39317	0.153087	0.291347	0.443401	0.41642	0.323258	0.421902	0.348067	0.379787	0.187491
Becn1	19.7148	31.195	15.0032	1.7534	11.3832	16.1296	17.5997	18.3874	13.5945	15.7333	51.2218	53.3741	52.0738	45.2554	49.9046	47.7968	40.6022	49.7805	44.5369	44.7879	0.384891	0.584459	0.288114	0.0387445	0.228099	0.337463	0.433467	0.369369	0.305242	0.351285
Bex3	41.6677	76.2628	80.8595	78.7494	68.9452	78.8814	29.3043	44.4932	29.307	25.1243	20.4978	18.5544	18.6886	15.7487	14.5609	16.6356	11.8899	15.2837	9.06999	8.04613	2.03279	4.11024	4.32668	5.00036	4.73496	4.74172	2.46465	2.91115	3.2312	3.12253
Bfar	19.0134	24.3001	18.8732	19.9981	20.4017	31.2995	113.217	114.487	149.236	112.983	26.3241	25.61	21.3941	20.189	26.5771	27.937	128.201	120.756	118.078	113.355	0.722281	0.948851	0.882168	0.990548	0.767642	1.12036	0.883123	0.948082	1.26387	0.996716
Bgn	3.51334	21.0448	10.1601	7.43681	8.27661	15.2026	11.7042	7.2758	14.8267	13.4168	3.64252	1.87736	1.7388	2.40612	1.75393	1.30351	3.06862	2.36842	5.09843	3.59928	0.964537	11.2097	5.84314	3.09079	4.71891	11.6629	3.81416	3.07201	2.90808	3.72762
Bhlhe40	16.3651	1.04729	80.9512	46.1556	21.8887	19.4542	2.56281	0.814677	1.47569	3.1627	3.12966	2.28228	23.4932	20.8212	7.667	6.70121	0.780898	0.935976	0.815536	1.27941	5.22902	0.458878	3.44573	2.21676	2.85492	2.90309	3.28188	0.870404	1.80947	2.472
Bicd2	16.6372	18.2626	27.4324	31.7053	34.6052	21.6936	17.9616	15.2531	8.93885	6.96645	20.6444	22.1812	22.5147	22.8641	26.4048	28.3193	18.0264	23.6576	10.383	10.103	0.805893	0.823335	1.21842	1.38668	1.31056	0.766038	0.996406	0.644744	0.860909	0.689541
Bin1	67.1405	63.8796	58.9875	36.3137	54.1921	42.1783	22.0235	22.2552	20.4763	4.93703	36.843	32.7099	30.955	28.3195	27.3048	29.806	14.4112	21.375	7.29891	7.81119	1.82234	1.95291	1.90559	1.28228	1.98471	1.4151	1.52821	1.04118	2.80539	0.632046
Bin2	66.2956	45.8903	52.4073	48.5639	23.637	15.8842	6.27752	6.65175	19.2782	14.2027	31.4252	32.3326	23.8449	23.309	15.0343	15.2538	2.88193	5.3495	9.34891	11.3655	2.10963	1.41932	2.19784	2.08348	1.5722	1.04133	2.17824	1.24343	2.06208	1.24963
Bin3	88.6299	93.7401	76.8599	42.8502	39.3073	53.3539	25.177	21.3424	16.9134	32.1061	33.6896	34.8773	28.584	27.3662	18.5215	20.6143	10.4844	16.0913	15.8634	19.5656	2.63078	2.68772	2.68892	1.56581	2.12226	2.5882	2.40137	1.32633	1.06619	1.64094
Birc3	3.0092	11.206	35.0049	47.7726	28.2112	53.1475	79.2432	78.1754	73.5745	51.4095	9.86889	11.8957	51.4605	52.0769	79.7051	78.4991	105.238	108.055	80.3188	82.4529	0.304918	0.942019	0.680229	0.917347	0.353945	0.677046	0.752988	0.723477	0.916031	0.623502
Birc5	109.499	90.5011	140.518	55.1858	127.652	101.2	71.5257	63.9159	20.135	16.1825	49.2896	47.1204	42.504	39.5345	40.73	40.6952	19.3919	26.7124	10.905	10.2995	2.22155	1.92064	3.30598	1.39589	3.13411	2.48678	3.68842	2.39274	1.8464	1.57119
Birc6	21.2018	17.1818	18.4398	12.3725	16.8694	16.5879	17.7413	18.157	20.5558	21.7606	21.5024	23.7733	24.9177	22.566	20.3251	19.7576	22.4487	23.0571	26.774	28.2468	0.986021	0.722735	0.740028	0.548283	0.829978	0.839566	0.790303	0.78748	0.767752	0.770374
Blmh	59.4126	50.0613	43.9095	39.7321	28.5179	63.5649	53.2874	62.8499	73.6646	71.7627	23.389	27.4009	22.4418	18.2701	23.6138	21.2413	27.7264	29.4211	39.7038	39.2024	2.5402	1.82699	1.95659	2.1747	1.20768	2.99251	1.9219	2.13622	1.85535	1.83057
Blnk	60.5104	58.2562	55.1722	85.0156	42.9054	74.9864	46.0638	51.7205	26.7673	31.5523	33.1552	30.9395	31.4896	29.395	28.84	33.611	30.4539	38.539	23.1657	22.6036	1.82506	1.88291	1.75208	2.89218	1.4877	2.23101	1.51258	1.34203	1.15548	1.39589
Bloc1s1	139.587	100.528	71.3467	85.0494	79.4622	53.1242	68.6338	83.5933	48.845	54.436	44.7425	40.9521	38.2364	40.1122	34.7381	32.5991	31.6373	33.8721	29.6934	26.0864	3.11978	2.45478	1.86593	2.12029	2.28747	1.62962	2.16939	2.46791	1.64498	2.08676
Bloc1s4	7.20126	25.961	10.0471	18.1466	30.9669	22.2576	12.8835	11.6509	5.62779	1.20615	11.6815	10.6126	10.2713	10.2358	9.70651	11.326	8.45775	13.1476	9.26834	9.41692	0.616465	2.44625	0.978179	1.77286	3.19032	1.96517	1.52328	0.886158	0.607206	0.128083
Bloc1s6	52.9407	85.5701	37.9864	52.6003	27.9975	17.5317	27.9944	36.2188	39.0091	44.8423	32.1642	33.1001	26.9809	25.6044	22.0493	26.4738	25.7469	32.4645	31.9062	32.4676	1.64595	2.58519	1.4079	2.05435	1.26976	0.662226	1.08729	1.11564	1.22262	1.38114
Blvra	154.059	158.684	133.989	102.489	99.7431	74.8257	61.9129	68.366	57.7906	40.2535	87.7313	88.8179	78.6966	72.6892	53.265	57.0163	34.9064	41.5853	25.824	30.8497	1.75603	1.78662	1.70261	1.40996	1.87258	1.31236	1.77368	1.64399	2.23787	1.30483
Blvrb	339.918	360.243	369.075	351.902	314.527	359.685	277.287	318.062	395.932	410.138	181.178	154.531	120.101	141.002	116.083	128.7	138.066	162.372	170.897	179.116	1.87615	2.3312	3.07305	2.49572	2.70949	2.79477	2.00836	1.95884	2.31679	2.28979
Bmp2k	23.2017	19.0501	27.3507	25.1062	18.3724	15.4672	14.5662	12.9543	21.8652	18.0589	16.436	16.3945	17.9654	16.5628	13.5813	13.6131	9.25642	10.9932	14.5005	17.6438	1.41164	1.16198	1.52241	1.51582	1.35277	1.1362	1.57363	1.17839	1.5079	1.02352
Bmpr2	16.2015	14.5155	17.6407	6.78347	8.52813	12.904	10.241	8.87186	19.8688	25.0487	13.712	14.524	14.7517	15.7013	12.7169	11.8411	12.5426	13.368	17.8529	19.7288	1.18156	0.999413	1.19584	0.432031	0.670612	1.08977	0.816497	0.663663	1.11292	1.26965
Bms1	6.65975	14.1031	7.21829	4.57692	6.56531	6.23754	10.0846	11.1013	7.09719	4.3604	8.58273	10.5784	7.74062	7.43207	8.4628	8.70829	8.85332	10.2734	7.04957	8.18784	0.775948	1.3332	0.932521	0.615834	0.775784	0.716277	1.13907	1.08059	1.00675	0.532546
Bmt2	47.506	48.4234	57.1603	31.0602	47.1705	63.9905	59.6444	57.3332	76.7605	64.1923	46.7262	51.0068	63.0809	66.778	61.9176	63.3254	60.4994	68.3199	77.7227	77.1203	1.01669	0.949352	0.906143	0.465127	0.761827	1.0105	0.985867	0.839188	0.98762	0.832366
Bnip2	56.3339	60.6506	73.1327	92.6897	39.4969	40.3284	49.3704	55.7578	56.3262	57.8615	84.3124	97.3368	79.0971	79.8049	70.3901	80.3157	72.9742	80.1156	91.9256	92.9197	0.668157	0.6231	0.924593	1.16145	0.561114	0.502124	0.676546	0.695966	0.612737	0.622705
Bnip3l	32.2056	29.1086	27.2321	51.3986	15.3879	37.7886	15.4531	13.1228	11.1861	13.7851	18.9284	18.059	15.7422	13.6406	15.1249	11.3523	9.29345	9.6964	7.41836	6.30385	1.70144	1.61186	1.72988	3.76807	1.01739	3.32871	1.66279	1.35337	1.5079	2.18677
Bod1l	2.85663	4.80109	5.40189	1.83234	3.2531	2.14042	3.10807	4.31362	3.04426	1.2179	5.02768	6.19501	4.38238	4.63086	2.9991	3.58871	3.70303	4.45815	2.97897	3.99069	0.568181	0.774994	1.23264	0.395681	1.08469	0.596433	0.839333	0.967581	1.02192	0.305186
Bola2	127.307	72.2888	94.5755	162.693	47.604	53.8691	59.4645	31.3858	7.10647	35.0303	189.195	132.082	139.388	134.148	140.121	139.596	80.6264	97.6596	68.3362	62.2284	0.672887	0.547304	0.678504	1.21279	0.339734	0.385892	0.737532	0.32138	0.103993	0.562931
Bop1	15.6005	26.7439	23.7444	32.7005	15.1141	24.6569	24.4106	23.8633	19.119	9.44226	20.8178	15.5852	16.5605	14.111	17.0984	16.1001	17.3841	20.5798	15.1784	13.304	0.749384	1.71598	1.4338	2.31738	0.883952	1.53147	1.40419	1.15955	1.25962	0.70973
Borcs6	8.59613	16.6867	6.54176	14.08	15.67	27.6759	2.12124	2.78153	1.67947	0.719888	7.88152	6.01512	12.3346	11.8019	10.3708	14.2132	3.27054	4.58047	5.6803	6.43589	1.09067	2.77413	0.530357	1.19303	1.51098	1.9472	0.648592	0.607259	0.295666	0.111855
Borcs7	44.8801	20.743	26.5645	169.641	6.99253	15.4128	10.152	11.2951	5.84564	5.01135	8.70463	9.99242	9.76907	7.4102	7.71727	6.63636	5.81552	6.7974	6.59037	5.27083	5.15589	2.07588	2.71924	22.893	0.906088	2.32247	1.74568	1.66168	0.886997	0.95077
Bphl	22.3134	19.3059	19.0185	4.72315	1.00124	22.0691	14.5364	11.5522	12.5553	4.48475	9.72562	10.5038	9.01861	9.05348	7.48557	7.84669	7.13117	7.78639	6.3373	5.73293	2.29429	1.83799	2.1088	0.521694	0.133756	2.81254	2.03843	1.48364	1.98118	0.782279
Bpnt1	45.2249	35.3441	44.5853	60.6077	45.5444	47.6525	27.3928	37.2498	12.0489	16.5268	22.6174	18.4384	20.5596	16.2034	16.1119	18.8185	13.9251	20.379	12.039	11.1566	1.99956	1.91687	2.16859	3.74044	2.82676	2.53221	1.96716	1.82785	1.00082	1.48135
Bptf	3.53948	3.38633	4.30975	3.4785	1.34007	1.2991	3.70116	3.37865	2.07458	3.24576	5.48571	6.51272	5.62017	5.59698	4.48812	4.21082	5.58569	6.36423	4.75115	5.91753	0.645219	0.519956	0.766837	0.621496	0.298581	0.308515	0.662614	0.53088	0.436649	0.548499
Brap	22.1895	8.46098	11.6095	43.3348	9.59381	5.35806	6.50234	9.8726	9.75439	6.0394	20.6872	21.4379	18.3032	17.0543	12.739	14.0567	9.56648	11.5029	11.1648	11.6142	1.07262	0.394673	0.634288	2.54099	0.753104	0.381175	0.6797	0.858267	0.873673	0.520001
Brd1	11.3059	13.6264	6.12205	4.93098	7.19512	4.87204	3.70203	1.68848	3.56823	3.38671	11.6388	11.5627	8.51874	8.25984	7.35909	8.17192	3.19378	3.90131	5.4539	5.17959	0.971399	1.17848	0.718657	0.596982	0.97772	0.596193	1.15914	0.432798	0.654252	0.653857
Brd2	31.4755	32.0347	29.6329	53.9675	34.763	40.8694	71.1053	72.0288	72.2729	49.0774	34.26	37.2587	53.2639	57.0035	51.9992	53.9142	61.5462	81.6435	53.1767	63.2535	0.918726	0.859793	0.556342	0.94674	0.668529	0.758045	1.15532	0.882236	1.35911	0.775884
Brd3	11.4139	7.31957	5.15739	18.0662	0.600189	4.68535	0.132027	2.30831	1.6725	2.86759	5.77339	5.33213	4.19254	3.50283	3.02708	2.64671	1.04435	1.46744	1.20159	1.31953	1.97698	1.37273	1.23013	5.15761	0.198273	1.77025	0.126421	1.57302	1.3919	2.17319
Brd4	39.7571	36.9492	27.5299	18.4123	19.4871	30.4434	21.345	24.802	24.3523	30.0553	9.43509	9.06825	8.78935	9.00185	10.1204	10.0821	7.34093	9.64029	6.75696	10.047	4.21375	4.07456	3.13219	2.04539	1.92552	3.01955	2.90767	2.57274	3.60404	2.99148
Brd7	19.1637	17.2716	23.6987	15.0909	18.1387	14.4992	15.0736	14.7273	13.1044	11.836	26.3136	24.4575	19.5121	18.959	16.6623	18.5479	16.8211	22.2831	14.2152	18.1295	0.728279	0.706186	1.21456	0.795976	1.08861	0.781718	0.896112	0.66092	0.921857	0.652857
Brd8	7.91774	10.297	10.3888	7.01763	8.11637	9.28251	5.96258	6.00749	5.12087	3.84127	8.83852	11.2198	8.1356	8.25543	7.19661	6.6944	4.03765	5.07496	3.8064	4.15116	0.895821	0.917756	1.27696	0.850062	1.1278	1.38661	1.47674	1.18375	1.34533	0.925349
Brd9	6.9791	4.59656	6.97093	2.63802	6.36115	8.76319	8.23434	7.62173	8.18126	5.4794	8.16785	9.96145	8.23036	7.52456	6.88109	8.30283	8.33392	10.2268	7.7315	7.02213	0.85446	0.461435	0.846977	0.350587	0.924439	1.05545	0.98805	0.745272	1.05817	0.780304
Bre	58.4116	48.2182	42.9013	23.6193	26.2865	49.8579	37.4599	41.7576	23.886	30.0329	21.1972	17.6715	16.2471	15.1834	15.8686	16.5989	15.2352	17.2036	13.1301	14.1096	2.75563	2.72859	2.64055	1.5556	1.65651	3.00369	2.45877	2.42725	1.81918	2.12853
Bri3	139.211	155.573	166.028	64.4009	128.196	207.109	159.202	178.839	165.627	193.146	57.1516	38.8594	59.7713	67.6584	72.8162	93.8476	69.3944	95.7815	77.9645	84.6374	2.43583	4.00348	2.77772	0.951855	1.76055	2.20687	2.29417	1.86716	2.12438	2.28204
Bri3bp	55.2096	32.3218	36.5688	27.8248	16.6304	40.2903	28.3832	15.2181	26.3672	11.3021	32.9895	21.8529	20.5563	20.6095	17.9661	21.4402	10.7057	11.808	10.9686	9.35187	1.67355	1.47906	1.77896	1.3501	0.925651	1.87919	2.65124	1.2888	2.40389	1.20853
Brip1	9.48792	8.44407	15.1125	11.6764	1.98018	6.64932	3.02193	3.99827	1.03463	1.10871	10.3877	11.5519	8.89545	8.43947	4.71452	4.57373	2.49659	3.75142	0.834803	1.1392	0.913384	0.730971	1.69891	1.38355	0.420018	1.4538	1.21042	1.0658	1.23937	0.973229
Brix1	59.6832	34.3279	44.2983	54.0316	9.50557	62.0588	29.7285	19.5507	20.73	15.55	12.0824	14.8585	12.1556	13.4248	15.3021	19.0769	8.19078	11.0665	5.3845	6.41026	4.93967	2.31031	3.64427	4.02476	0.621193	3.25309	3.62951	1.76666	3.84995	2.4258
Brk1	167.121	428.69	347.099	429.028	261.684	279.79	162.383	189.269	130.605	141.706	154.701	154.152	125.645	118.997	108.807	107.272	66.5212	77.6607	67.3066	74.8756	1.08028	2.78096	2.76253	3.60537	2.40504	2.60822	2.44107	2.43713	1.94045	1.89255
Brms1	18.0245	48.8083	15.3307	47.2907	24.3827	10.6505	24.3325	12.3509	37.287	15.4499	21.312	21.111	19.2405	16.2351	16.0909	21.7212	15.8903	19.7081	16.9798	16.1637	0.845746	2.31198	0.796791	2.91287	1.51531	0.490325	1.53128	0.626691	2.19596	0.955841
Brox	29.7526	31.2476	30.3501	12.9211	19.5287	11.7395	52.956	41.377	35.6196	45.4859	31.1412	31.3297	25.1291	22.372	25.7874	24.0482	35.2162	35.8024	40.8793	34.845	0.95541	0.997382	1.20777	0.577556	0.757294	0.488163	1.50374	1.15571	0.871336	1.30538
Brpf1	5.18609	3.33655	5.68322	15.3686	6.05043	7.69398	4.91427	6.17545	3.40447	8.13033	12.6409	12.9059	13.197	13.1212	12.2822	12.649	8.79159	10.5704	11.0093	12.633	0.410263	0.25853	0.430646	1.17128	0.492618	0.608267	0.558974	0.584221	0.309236	0.643579
Brwd3	1.73174	1.76086	2.19647	3.92747	2.42832	0.446038	5.92932	5.22999	2.70672	2.17539	1.67938	2.34095	1.77067	1.958	2.23334	2.25808	5.68634	6.21614	3.31333	4.22992	1.03118	0.7522	1.24047	2.00586	1.08731	0.19753	1.04273	0.841357	0.816918	0.514286
Bscl2	44.1095	54.9506	22.2065	16.4164	31.5922	33.0346	18.5879	24.1542	7.955	23.8688	41.4956	35.9163	31.6261	33.4091	31.5737	31.2529	23.5063	27.4142	22.5794	22.1528	1.06299	1.52996	0.702156	0.491374	1.00059	1.05701	0.790762	0.881084	0.352312	1.07746
Bsdc1	12.1722	8.43877	13.4316	42.3287	17.0684	18.3406	9.68695	16.1486	2.85378	15.5963	12.6197	12.2342	12.6759	14.9028	14.8876	12.6647	11.2355	13.5452	12.207	12.173	0.964537	0.689769	1.05962	2.84031	1.14648	1.44817	0.862174	1.1922	0.233782	1.28122
Bsg	382.133	337.33	293.853	341.316	334.785	337.013	261.171	227.447	261.112	287.85	145.127	147.507	130.373	138.612	123.25	139.045	126.59	129.053	136.664	131.247	2.63309	2.28687	2.25395	2.46238	2.71631	2.42377	2.06312	1.76243	1.91061	2.19319
Bst2	573.663	685.736	536.515	691.598	573.251	563.417	987.39	925.196	1585.63	1539.86	322.931	312.396	269.593	346.837	251.414	334.964	545.099	564.063	953.36	918.733	1.77643	2.19508	1.99009	1.99401	2.2801	1.68202	1.8114	1.64023	1.6632	1.67607
Btaf1	25.6896	19.5425	24.5712	16.9799	22.0469	22.2367	20.6809	26.7094	17.1144	22.0077	22.3659	24.8524	27.9208	27.0099	25.9018	26.4154	25.6926	26.4834	21.2082	21.7319	1.14861	0.786342	0.880033	0.628656	0.851174	0.841809	0.804937	1.00853	0.80697	1.01269
Btbd10	21.2734	8.47093	7.88713	4.53601	5.50717	3.37188	11.9125	7.06015	3.83659	4.38537	8.65605	8.81365	8.71753	7.89427	7.897	7.61122	7.44415	7.19206	6.38911	5.6325	2.45764	0.961115	0.904744	0.574595	0.697375	0.443015	1.60025	0.981659	0.600489	0.778584
Btbd2	18.8279	9.89284	11.6889	9.73868	10.5605	7.27414	3.66798	3.52713	2.32327	1.99169	11.1124	8.06877	7.81625	8.29104	6.08477	6.07431	2.508	4.22421	3.38962	2.90052	1.69431	1.22607	1.49546	1.1746	1.73556	1.19753	1.46251	0.834981	0.685407	0.686667
Btbd9	16.5085	10.3299	7.73117	22.4	9.02212	18.6435	10.6544	12.8751	6.9469	12.7617	7.7024	8.75134	7.20136	7.27469	6.76212	7.44275	8.12948	8.53956	6.86665	7.38234	2.14329	1.18038	1.07357	3.07917	1.33421	2.50491	1.31059	1.5077	1.01169	1.72867
Btd	22.9488	22.2063	23.7812	25.1003	10.4071	19.2416	9.57893	9.79568	11.4476	1.96275	9.14304	7.08184	5.18547	7.9813	5.1676	6.02543	4.11927	5.13094	3.82118	3.77147	2.50998	3.13567	4.58613	3.14489	2.01391	3.1934	2.32539	1.90914	2.99582	0.520422
Btf3	195.147	229.2	211.602	170.668	116.611	144.876	161.464	174.992	137.556	153.814	180.139	157.081	169.779	135.971	154.473	141.452	151.215	154.705	149.462	129.267	1.08332	1.45912	1.24633	1.25518	0.754899	1.02421	1.06777	1.13113	0.920343	1.18989
Btf3l4	115.363	110.6	62.7093	51.0813	44.3705	110.79	62.2228	43.7285	27.047	17.3901	46.9005	47.911	31.2663	37.0544	30.7704	33.497	16.439	22.2197	13.9225	13.8017	2.45975	2.30845	2.00565	1.37855	1.44199	3.30745	3.78507	1.96801	1.94269	1.26
Btg1	86.2178	56.2078	96.6926	233.271	127.261	109.865	72.7855	66.5644	10.6388	82.0842	56.8075	50.3237	98.2542	100.072	88.1974	87.8394	58.5499	61.0302	40.9999	31.1148	1.51772	1.11693	0.984107	2.33103	1.44291	1.25075	1.24314	1.09068	0.259485	2.63811
Btg2	29.4763	9.99065	87.2351	95.3235	11.9406	13.9188	56.372	71.0046	119.018	47.7246	12.3003	12.3964	68.889	82.9484	8.66558	8.18894	27.3867	26.7052	33.3543	30.8897	2.3964	0.805929	1.26631	1.14919	1.37794	1.69971	2.05837	2.65883	3.5683	1.545
Btk	37.8774	31.2928	29.726	17.2999	27.8844	15.5485	37.5337	37.7904	33.3014	23.1957	22.2063	24.4214	20.5035	18.1756	16.1515	16.5799	20.99	24.9746	21.2054	22.6965	1.70571	1.28137	1.4498	0.951822	1.72643	0.937793	1.78817	1.51315	1.57042	1.02199
Btrc	6.00838	4.76057	4.89906	7.78662	7.46232	4.64266	7.46631	6.66578	11.0681	4.95987	3.22361	4.42276	3.89404	2.57871	2.2282	2.73458	4.72816	3.72277	4.84891	5.1818	1.86387	1.07638	1.25809	3.01957	3.34904	1.69776	1.57912	1.79055	2.28259	0.957173
Bub1	21.1091	16.8808	20.3605	7.60786	5.92	9.86241	10.5392	13.0255	1.7264	1.60335	16.8008	18.94	18.323	14.2885	16.2727	14.5708	9.29404	10.1348	2.74778	3.32284	1.25643	0.891275	1.1112	0.532447	0.3638	0.676862	1.13397	1.28523	0.62829	0.482523
Bub1b	16.2827	21.756	14.6443	18.2775	13.0075	6.2908	4.292	4.63011	1.73522	1.48757	17.8784	19.9941	13.9142	11.859	10.5672	11.2028	4.19939	4.92818	1.2914	1.32389	0.910748	1.08812	1.05247	1.54124	1.23093	0.561539	1.02205	0.939518	1.34367	1.12364
Bub3	119.403	138.629	102.377	154.054	87.0645	56.5876	92.2247	100.97	69.052	59.5969	77.897	69.0696	63.9366	55.5956	58.3365	63.2404	53.8035	63.052	44.4322	45.0785	1.53283	2.00709	1.60123	2.77097	1.49245	0.8948	1.7141	1.60137	1.5541	1.32207
Bud31	104.744	126.203	123.69	217.072	158.018	188.383	91.5796	100.51	101.616	55.3532	81.3887	91.3304	83.9777	80.6247	73.7468	90.3079	65.1543	77.0728	63.3646	67.3229	1.28695	1.38183	1.47289	2.69238	2.14271	2.08601	1.40558	1.30409	1.60367	0.822204
Bysl	17.8232	13.5098	15.3722	13.0248	17.6614	12.3948	6.5973	9.22758	2.78578	2.08967	7.73083	7.97438	7.10579	6.02638	6.64362	6.61271	6.19148	6.92042	4.126	4.32328	2.30548	1.69415	2.16334	2.1613	2.6584	1.87439	1.06554	1.33338	0.675177	0.483352
Bzw1	127.168	126.611	115.188	130.839	125.607	123.188	99.6538	109.998	95.9886	96.9391	100.671	106.309	99.5229	83.8851	96.373	92.962	91.492	94.5516	83.0118	75.4034	1.2632	1.19097	1.1574	1.55974	1.30335	1.32514	1.08921	1.16337	1.15633	1.28561
C1d	108.838	98.2201	89.8465	154.796	47.5959	66.9941	38.2381	52.5282	43.2494	50.0537	59.1326	75.4552	49.643	52.7987	44.0198	56.8365	29.5693	39.5927	31.4545	33.972	1.84058	1.3017	1.80985	2.93182	1.08124	1.17872	1.29317	1.32671	1.37498	1.47338
C1galt1	9.96417	22.895	19.4988	16.1415	14.7706	8.79919	2.37102	2.303	1.66865	5.00674	22.3627	23.1357	21.208	21.0605	15.2071	17.164	4.66226	4.97429	2.13944	2.14111	0.44557	0.989596	0.919408	0.766431	0.971292	0.512653	0.508555	0.462981	0.779946	2.33838
C1galt1c1	67.744	69.2603	50.3118	27.149	16.9386	80.7258	31.7221	34.8616	30.6171	47.9836	26.6813	26.7912	24.1526	24.4155	21.9213	21.4608	21.5079	20.0666	22.3773	19.5435	2.53901	2.58519	2.08308	1.11196	0.772701	3.76155	1.47491	1.7373	1.36822	2.45521
C1qa	1544.82	1627.03	1223.77	1214.88	1064.62	1358.26	898.121	887.142	927.089	950.55	900.259	872.097	745.524	1009.05	646.966	885.88	648.365	665.374	673.791	647.736	1.71597	1.86566	1.64149	1.20398	1.64556	1.53324	1.38521	1.3333	1.37593	1.4675
C1qb	4720.31	5026.48	4425.98	5123.03	3955.09	4671.45	3529.99	3379.24	3607.54	4073.11	1698.93	1607.25	1426.62	1583.25	1314.28	1625.66	1663.57	1533.97	1777.68	1653.88	2.7784	3.12738	3.10243	3.23577	3.00932	2.87357	2.12194	2.20293	2.02935	2.46276
C1qbp	129.288	146.508	120.332	52.0334	109.036	139.429	79.8747	100.524	41.433	50.9427	37.2938	30.8268	32.9905	27.8236	29.0675	27.9824	18.6019	23.0982	13.5459	13.726	3.46673	4.7526	3.64749	1.87011	3.75115	4.98273	4.29391	4.35202	3.05872	3.71141
C1qc	3834.22	3806.95	3377.43	3821.11	2881.61	3574.54	2340.91	2353.58	2563.11	2536.6	1304.67	1150.93	1025.32	1258.02	933.832	1218.96	968.688	1034.6	1028.91	1063.28	2.93885	3.30772	3.29404	3.03739	3.08579	2.93244	2.41658	2.27487	2.49109	2.38565
C2cd3	2.11732	2.53406	2.96821	1.17942	3.00025	1.29162	1.31997	1.44236	0.783801	0.895916	5.10478	5.35926	4.45814	4.07513	2.89286	2.53465	2.17891	2.6072	2.50081	3.07608	0.414773	0.472839	0.665794	0.28942	1.03712	0.509585	0.605792	0.553223	0.313419	0.291252
C3	20.7761	19.1472	21.8737	28.4602	114.956	140.379	587.702	523.059	780.088	882.802	6.72609	7.37337	14.5442	17.4804	47.5077	54.9458	281.993	263.96	399.199	395.719	3.08889	2.59681	1.50395	1.62812	2.41972	2.55487	2.0841	1.98158	1.95414	2.23088
C330007P06Rik	29.3223	25.3701	12.4962	12.4135	15.131	0.90629	17.8	5.31332	2.74985	31.8247	15.7586	18.3545	15.7213	13.034	12.8816	15.2306	11.5248	11.6856	11.0026	10.0132	1.86072	1.38223	0.794856	0.952395	1.17462	0.0595043	1.5445	0.454689	0.249927	3.17829
C330027C09Rik	18.0351	26.3565	16.775	12.3357	17.8232	12.3873	8.15923	11.6716	6.0405	2.44535	12.205	11.6549	12.2789	10.8385	11.2901	11.5216	6.89018	7.88956	2.89316	3.67757	1.47768	2.26141	1.36616	1.13814	1.57866	1.07513	1.18418	1.47937	2.08785	0.664937
C3ar1	2313.4	1753.13	1774.51	1612.81	1170.25	1530.28	1539.75	1615.72	1984.49	2426.97	688.933	652.539	666.429	636.906	512.308	532.214	570.779	542.431	798.745	757.562	3.35795	2.68663	2.66272	2.53225	2.28426	2.87532	2.69764	2.97866	2.48451	3.20365
C5ar1	2145.98	1784.92	1946.53	2317.27	2027.02	2249.19	1098.68	1091.8	739.688	874.316	471.952	401.961	570.605	559.965	567.084	545.296	300.913	307.121	220.802	200.373	4.54703	4.44052	3.41135	4.13824	3.57447	4.12471	3.65115	3.55497	3.35001	4.36344
Cab39	159.918	101.365	118.802	141.619	76.0291	95.9122	50.4556	40.4112	57.1318	58.9266	65.0138	69.8055	63.8346	54.4647	52.6903	48.3378	34.0873	44.5408	37.9279	36.5922	2.45975	1.45211	1.86109	2.60019	1.44294	1.98421	1.48019	0.907286	1.50633	1.61036
Cabin1	10.5427	5.45306	5.6793	9.67151	2.52481	3.93587	6.75246	7.20611	5.27676	3.51179	6.62939	6.45038	6.22904	5.97729	5.32226	5.61791	6.49582	7.84454	5.85078	5.64879	1.5903	0.845387	0.911746	1.61804	0.474387	0.700593	1.03951	0.918615	0.901889	0.621689
Cacna1a	5.25198	2.85091	1.27558	10.2216	1.69228	3.28109	1.11678	0.650846	1.57191	1.12297	6.71473	6.83121	6.56732	7.35682	5.43344	5.9124	2.44553	2.89131	1.15249	1.21292	0.782158	0.417336	0.194232	1.3894	0.311456	0.554951	0.456662	0.225104	1.36393	0.925844
Cactin	4.69055	6.87539	6.37423	6.58532	1.87922	4.91879	2.4803	3.686	3.142	2.69357	8.50671	8.48257	6.7708	7.72777	5.95437	5.2154	3.39184	4.55035	4.32368	4.52197	0.551393	0.810531	0.941429	0.852163	0.315604	0.943129	0.731256	0.810048	0.726696	0.595663
Cacul1	70.9557	51.9624	59.765	49.9954	44.822	44.7135	10.1997	23.1827	29.0719	23.8843	68.1423	60.3	65.9153	69.611	53.8558	49.5066	23.0078	27.4539	27.5987	28.8738	1.04129	0.861731	0.906693	0.718211	0.832259	0.903184	0.443317	0.844422	1.05338	0.827198
Cacybp	95.34	73.022	57.8712	48.0499	59.8421	70.1609	107.551	127.073	98.4574	142.577	49.951	59.0606	40.2571	42.8252	42.7226	52.821	61.8455	82.5324	70.0594	78.8556	1.90867	1.23639	1.43754	1.122	1.40071	1.32828	1.73903	1.53967	1.40534	1.80808
Cad	10.957	12.9945	9.75773	14.8922	7.58411	5.76439	7.68003	8.7505	3.5527	3.04566	8.26217	7.52626	7.60775	6.10014	6.04021	5.56571	5.42596	5.99736	2.83936	2.67262	1.32617	1.72656	1.2826	2.44129	1.2556	1.0357	1.41542	1.45906	1.25123	1.13958
Cadm1	438.743	324.106	296.475	418.246	273.317	314.972	229.896	195.332	157.578	160.418	123.117	135.908	120.954	131.48	110.788	131.961	101.731	106.887	75.0867	74.6848	3.56363	2.38475	2.45113	3.18106	2.46702	2.38685	2.25983	1.82747	2.09862	2.14793
Calcrl	181.306	126.085	115.763	46.6778	129.085	186.503	329.32	321.85	325.055	361.585	81.1769	88.2687	81.7786	68.978	101.944	99.828	225.188	196.46	211.729	191.226	2.23346	1.42843	1.41557	0.676705	1.26623	1.86825	1.46242	1.63825	1.53524	1.89088
Calm1	1308.04	1274.34	1289.04	1217.58	1086.44	1244.52	914.062	1038.9	947.893	810.618	516.763	593.559	472.176	488.713	428.342	519.513	405.805	544.825	453.935	508.557	2.53122	2.14695	2.73	2.49141	2.53638	2.39554	2.25247	1.90685	2.08817	1.59396
Calm2	492.505	614.358	596.216	476.996	391.264	526.821	230.958	279.03	139.712	138.267	290.926	302.708	270.529	234.065	239.218	251.77	142.297	177.836	108.641	96.6894	1.69289	2.02954	2.20389	2.03788	1.6356	2.09247	1.62307	1.56902	1.286	1.43001
Calm3	213.828	348.007	220.08	299.448	193.666	222.105	88.88	154.26	184.913	88.9486	214.162	190.99	176.558	148.23	155.92	155.642	110.289	129.359	121.631	115.856	0.998442	1.82212	1.2465	2.02016	1.24208	1.42702	0.805881	1.19249	1.52028	0.76775
Calr	1640.07	1991.56	1599.9	1686.94	1260.02	1460.09	1284.11	1112.25	1316.33	1201.81	459.936	543.32	426.841	513.168	344.132	482.43	407.725	402.05	418.244	437.705	3.56587	3.66553	3.74824	3.2873	3.66145	3.02654	3.14946	2.76645	3.14728	2.74571
Calu	163.806	162.984	149.716	184.817	124.197	122.12	144.423	128.382	100.353	130.701	63.7446	79.8539	61.3627	62.4894	56.2153	69.3127	57.4344	61.1206	60.9206	62.7107	2.56973	2.04103	2.43985	2.95758	2.20932	1.76188	2.51456	2.10047	1.64728	2.08419
Camk1	75.1368	86.4325	71.4751	62.0611	71.0204	60.2083	28.5845	37.3695	32.6219	23.0721	95.5342	96.6121	86.7966	87.9202	65.8503	72.3858	43.1567	51.7272	31.2613	31.394	0.786491	0.894634	0.823478	0.70588	1.07851	0.831769	0.662342	0.722435	1.04353	0.73492
Camk1d	35.5195	32.1196	40.5462	16.3446	38.9793	22.6726	26.0093	26.4847	5.43102	12.0277	15.0308	16.3078	15.0473	16.2636	11.7185	13.6392	8.77514	11.3292	4.12197	4.8028	2.36311	1.96958	2.69458	1.00498	3.3263	1.66232	2.96398	2.33774	1.31758	2.50432
Camk2d	78.811	69.2311	70.4068	94.3646	46.1268	65.0577	63.5985	76.98	70.007	64.443	31.9004	32.2604	30.1317	27.7997	36.3137	37.4681	36.9487	44.8396	35.6955	39.0042	2.47053	2.14601	2.33664	3.39444	1.27023	1.73635	1.72126	1.71679	1.96123	1.65221
Camk2g	16.3333	12.2733	6.01445	25.4918	4.72842	6.51392	1.56021	1.02293	3.70583	3.97116	8.41676	9.25062	5.75847	6.36569	3.26156	2.88973	1.09818	1.61921	1.80225	1.45652	1.94057	1.32676	1.04445	4.00457	1.44974	2.25416	1.42073	0.631745	2.05622	2.72647
Camkk2	7.69089	19.9949	9.87672	4.3606	16.9856	10.3998	23.3081	25.1972	10.1426	18.1147	22.2225	20.4565	20.0229	19.7828	25.4843	27.1	37.8568	45.7464	29.1226	28.921	0.346085	0.977431	0.493271	0.220424	0.666512	0.383756	0.615693	0.550803	0.348273	0.626352
Caml	40.4955	39.0606	39.5269	1.99654	35.552	46.2559	70.3852	72.9238	47.4709	65.4672	20.7687	21.9525	15.703	13.3662	15.8213	20.6622	40.1926	44.5089	39.466	37.5063	1.94983	1.77932	2.51715	0.149373	2.2471	2.23867	1.7512	1.63841	1.20283	1.7455
Camsap2	5.84216	4.71303	5.25431	4.2827	0.496492	4.24063	0.393178	0.916558	0.415059	1.86807	8.87754	8.95314	7.1554	6.63404	5.2674	5.24035	3.03101	3.47499	2.22958	2.46139	0.658083	0.526411	0.734315	0.645564	0.0942575	0.809227	0.129718	0.263759	0.18616	0.758948
Camta2	4.93545	3.57043	3.75594	11.031	4.93476	2.15552	2.93887	2.77741	2.51548	5.60681	10.0795	7.57602	8.91647	9.03936	6.57746	6.29993	2.97107	3.95677	6.27245	7.03119	0.489654	0.47128	0.421237	1.22033	0.750253	0.34215	0.989161	0.701939	0.401036	0.79742
Cand1	43.1161	36.9781	40.6548	48.3356	38.6939	45.5044	29.272	34.028	25.6413	22.8272	25.4324	25.2067	24.7651	21.8641	25.8502	25.7339	18.5683	20.5585	14.7919	15.5957	1.69532	1.467	1.64161	2.21073	1.49685	1.76826	1.57645	1.65518	1.73347	1.46369
Cant1	29.9542	26.3859	22.7955	44.4013	13.1774	17.6995	21.7403	8.3622	35.8023	35.7097	24.3573	21.9318	21.2561	19.0494	16.537	17.8119	17.6049	17.4678	23.0431	20.6776	1.22978	1.20309	1.07242	2.33085	0.796843	0.993691	1.2349	0.478722	1.55371	1.72698
Canx	612.987	549.571	524.677	487.654	457.937	587.398	459.489	401.819	429.6	470.074	201.754	251.632	211.584	235.298	185.057	231.433	210.346	206.026	220.268	238.677	3.03829	2.18403	2.47976	2.0725	2.47458	2.53809	2.18444	1.95033	1.95035	1.9695
Cap1	1241.63	1109.42	978.687	808.932	795.74	831.06	737.577	802.467	703.011	732.412	343.959	362.352	292.78	275.617	242.081	274.701	246.931	313.484	256.037	294.701	3.60982	3.06173	3.34273	2.93499	3.28707	3.02533	2.98698	2.55983	2.74573	2.48527
Capg	1174.3	1024.23	874.953	942.344	781.034	858.468	744.198	831.758	757.681	709.784	601.149	569.376	533.527	502.799	447.795	473.388	531.539	590.45	570.9	511.717	1.95342	1.79886	1.63994	1.8742	1.74418	1.81346	1.40008	1.40869	1.32717	1.38706
Capn1	25.1806	25.3004	18.3296	11.5871	16.58	14.9452	26.3409	27.8683	35.935	25.1218	13.1652	13.4646	10.912	12.1191	9.98363	10.6552	15.4119	16.0812	17.0034	14.999	1.91267	1.87903	1.67977	0.956101	1.66072	1.40263	1.70913	1.73298	2.1134	1.6749
Capn2	107.073	71.7576	80.6353	72.5131	96.9671	84.7462	63.716	61.3535	53.1703	56.4169	63.7568	65.9372	64.63	58.4415	56.9794	59.7028	44.9259	56.5751	43.3348	42.9997	1.6794	1.08827	1.24764	1.24078	1.70179	1.41947	1.41825	1.08446	1.22697	1.31203
Capn5	17.4194	7.41444	9.55693	23.2748	8.63438	11.8948	19.7933	23.3327	18.9953	19.9482	12.4285	8.34946	7.72725	8.16601	8.85787	8.07043	14.2535	17.6101	14.8227	16.1393	1.40157	0.888014	1.23678	2.85021	0.974769	1.47388	1.38866	1.32496	1.2815	1.236
Capn7	20.7778	19.502	13.1363	15.4659	10.7577	7.90399	9.70241	8.2748	2.24832	8.35225	21.136	22.7951	20.2369	19.3929	17.8091	17.403	10.1843	11.0121	8.51546	8.94066	0.983056	0.855536	0.649126	0.797502	0.604059	0.454172	0.952683	0.751428	0.264028	0.934187
Capns1	558.772	492.399	478.572	500.426	404.052	415.213	389.518	390.593	374.298	395.228	124.098	116.235	93.1449	97.864	86.6978	96.2604	92.3677	105.529	91.47	92.5255	4.50267	4.23625	5.13793	5.11348	4.66046	4.31343	4.21704	3.70131	4.09203	4.27155
[truncated: 5,635 more rows]
