# Supplementary material for: Translation repression via modulation of the cytoplasmic poly(A)-binding protein in the inflammatory response
Source: eLife. 2017 Jun 21;6:e27786. doi: 10.7554/eLife.27786 (PMC5507668; doi:10.7554/eLife.27786)
Supplement: Supplementary file 2. — DOI: http://dx.doi.org/10.7554/eLife.27786.018 [file elife-27786-supp2.xlsx]

## Sheet: Sheet1
Identified Proteins (127)	Accession Number	Enichment in Anti-V5 (Log2)
tristetraprolin [Mus musculus]	gi|6756059	4.554
polyadenylate-binding protein 1 [Mus musculus]	gi|31560656 (+1)	2.45413
Cluster of 14-3-3 protein theta [Mus musculus] (gi|6756039)	gi|6756039 [9]	2.29597
galectin-1 [Mus musculus]	gi|6678682	1.281
heterogeneous nuclear ribonucleoprotein K isoform 2 [Mus musculus]	gi|13384620 (+8)	1.26843
myristoylated alanine-rich C-kinase substrate [Mus musculus]	gi|6678768	0.936633
transmembrane glycoprotein NMB precursor [Mus musculus]	gi|171846253	0.806633
plastin-2 [Mus musculus]	gi|31543113 (+8)	0.721333
macrophage-expressed gene 1 protein precursor [Mus musculus]	gi|133506753 (+1)	0.708733
MARCKS-related protein [Mus musculus]	gi|6754706	0.6089
lymphocyte-specific protein 1 isoform 2 [Mus musculus]	gi|11225264 (+7)	0.4669
nestin [Mus musculus]	gi|50363232	0.389733
pleckstrin homology domain-containing family O member 2 [Mus musculus]	gi|24025665	0.385367
heat shock cognate 71 kDa protein [Mus musculus]	gi|31981690	0.245633
Cluster of peroxiredoxin-1 [Mus musculus] (gi|6754976)	gi|6754976	0.203267
PREDICTED: myosin phosphatase Rho-interacting protein isoform X1 [Mus musculus]	gi|568974184 (+5)	0.201267
talin-1 [Mus musculus]	gi|227116327 (+4)	0.165367
Cluster of plectin isoform 1a [Mus musculus] (gi|254675265)	gi|254675265	0.1395
Cluster of vimentin [Mus musculus] (gi|31982755)	gi|31982755 [4]	0.1383
brain acid soluble protein 1 [Mus musculus]	gi|45598372	0.1181
filamin-A isoform 1 [Mus musculus]	gi|125347376 (+2)	0.0897333
stress-70 protein, mitochondrial [Mus musculus]	gi|162461907	0.0564
galectin-3 [Mus musculus]	gi|225543163 (+1)	0.0502333
78 kDa glucose-regulated protein precursor [Mus musculus]	gi|254540166 (+1)	0.0262
band 4.1-like protein 2 [Mus musculus]	gi|157041260 (+10)	-0.0482
F-actin-capping protein subunit alpha-1 [Mus musculus]	gi|161086971	-0.0863667
F-actin-capping protein subunit beta isoform c [Mus musculus]	gi|407027856 (+1)	-0.1116
F-actin-capping protein subunit alpha-2 [Mus musculus]	gi|6671672	-0.160633
UDP-glucose:glycoprotein glucosyltransferase 1 precursor [Mus musculus]	gi|236466498 (+2)	-0.162933
Cluster of actin, cytoplasmic 1 [Mus musculus] (gi|6671509)	gi|6671509 [4]	-0.167367
PREDICTED: unconventional myosin-Va isoform X1 [Mus musculus]	gi|568960777 (+1)	-0.2073
tropomodulin-3 [Mus musculus]	gi|8394460	-0.2328
integrin alpha-M isoform 1 precursor [Mus musculus]	gi|132626289 (+1)	-0.288
Cluster of myosin-9 [Mus musculus] (gi|114326446)	gi|114326446	-0.303067
ras GTPase-activating-like protein IQGAP1 [Mus musculus]	gi|242332572 (+1)	-0.331633
gelsolin isoform 2 [Mus musculus]	gi|329755239 (+3)	-0.340167
ena/VASP-like protein isoform 1 [Mus musculus]	gi|254281243 (+5)	-0.350933
calmodulin [Mus musculus]	gi|6680832 (+3)	-0.3586
ras-related protein Rap-1A precursor [Mus musculus]	gi|21704066 (+2)	-0.3669
cell division control protein 42 homolog isoform 1 precursor [Mus musculus]	gi|6753364	-0.371033
PREDICTED: ubiquitin-40S ribosomal protein S27a-like isoform X2 [Mus musculus]	gi|755567399	-0.382733
PREDICTED: neuroblast differentiation-associated protein AHNAK isoform X1 [Mus musculus]	gi|569007628 (+4)	-0.404367
low affinity immunoglobulin gamma Fc region receptor III precursor [Mus musculus]	gi|190570188 (+4)	-0.438167
extended synaptotagmin-1 [Mus musculus]	gi|33859650	-0.440467
40S ribosomal protein S25 [Mus musculus]	gi|28372479	-0.445067
myosin light polypeptide 6 isoform MLC3sm [Mus musculus]	gi|33620739 (+4)	-0.448867
receptor-type tyrosine-protein phosphatase C isoform 1 precursor [Mus musculus]	gi|392871554 (+8)	-0.4766
tubulin alpha-1B chain [Mus musculus]	gi|34740335 (+1)	-0.4775
Cluster of guanine nucleotide-binding protein G(I)/G(S)/G(T) subunit beta-2 [Mus musculus] (gi|13937391)	gi|13937391 [2]	-0.479833
actin-related protein 3 [Mus musculus]	gi|23956222 (+2)	-0.483033
actin-related protein 2/3 complex subunit 2 [Mus musculus]	gi|112363072 (+1)	-0.500833
monocyte differentiation antigen CD14 precursor [Mus musculus]	gi|6753332	-0.500867
integrin beta-2 precursor [Mus musculus]	gi|111607447	-0.526033
actin-related protein 2 [Mus musculus]	gi|22122825	-0.532733
syntaxin-binding protein 3 [Mus musculus]	gi|6755690	-0.569933
40S ribosomal protein S4, X isoform [Mus musculus]	gi|6677805 (+1)	-0.5755
platelet glycoprotein 4 [Mus musculus]	gi|227116343 (+10)	-0.5879
60S ribosomal protein L9 [Mus musculus]	gi|14149647	-0.588567
40S ribosomal protein S7 [Mus musculus]	gi|6755376	-0.601933
Cluster of tubulin beta-2B chain [Mus musculus] (gi|21746161)	gi|21746161 [4]	-0.609967
protein XRP2 isoform a [Mus musculus]	gi|19526820 (+1)	-0.6461
annexin A1 [Mus musculus]	gi|124517663	-0.646733
Cluster of tyrosine-protein kinase Lyn isoform B [Mus musculus] (gi|161760634)	gi|161760634 [4]	-0.6487
guanine nucleotide-binding protein G(i) subunit alpha-2 [Mus musculus]	gi|41054806 (+1)	-0.648767
aminopeptidase N [Mus musculus]	gi|225637487 (+1)	-0.6508
ATP synthase subunit beta, mitochondrial precursor [Mus musculus]	gi|31980648	-0.654333
complement C1q subcomponent subunit A precursor [Mus musculus]	gi|124286805	-0.655767
40S ribosomal protein S3 [Mus musculus]	gi|6755372	-0.6568
Cluster of histone H1.2 [Mus musculus] (gi|9845257)	gi|9845257 [4]	-0.6656
ATP synthase subunit alpha, mitochondrial precursor [Mus musculus]	gi|6680748	-0.707733
unconventional myosin-Ic isoform b [Mus musculus]	gi|124494244 (+2)	-0.733167
PREDICTED: plasma membrane calcium-transporting ATPase 1 isoform X2 [Mus musculus]	gi|568968333 (+4)	-0.8163
calnexin precursor [Mus musculus]	gi|160333212 (+2)	-0.8524
tropomyosin alpha-4 chain [Mus musculus]	gi|47894398	-0.858333
Cluster of sodium/potassium-transporting ATPase subunit alpha-1 precursor [Mus musculus] (gi|21450277)	gi|21450277 [5]	-0.890733
high affinity immunoglobulin gamma Fc receptor I precursor [Mus musculus]	gi|6753832	-0.969667
Cluster of tropomyosin alpha-3 chain isoform Tpm3.1cy [Mus musculus] (gi|359279904)	gi|359279904 [3]	-0.977233
complement C1q subcomponent subunit B precursor [Mus musculus]	gi|6753220	-0.987333
PREDICTED: myosin light chain, regulatory B-like isoform X1 [Mus musculus]	gi|569001415 (+1)	-0.997333
40S ribosomal protein S18 [Mus musculus]	gi|6755368	-1.00997
complement C1q subcomponent subunit C precursor [Mus musculus]	gi|113680120	-1.02333
E3 ubiquitin-protein ligase TRIM21 [Mus musculus]	gi|127139140 (+1)	-1.03323
actin-related protein 2/3 complex subunit 3 [Mus musculus]	gi|9790141	-1.06563
40S ribosomal protein S16 [Mus musculus]	gi|158966704	-1.0905
ras-related protein Rab-10 [Mus musculus]	gi|7710086	-1.1239
histone H2B type 3-A [Mus musculus]	gi|13386452 (+23)	-1.18593
40S ribosomal protein S11 [Mus musculus]	gi|21426889	-1.18783
Cluster of unconventional myosin-Ie [Mus musculus] (gi|68299824)	gi|68299824 [3]	-1.40953
40S ribosomal protein S19 [Mus musculus]	gi|12963511 (+2)	-1.48597
60S ribosomal protein L13 [Mus musculus]	gi|33186863	-1.62707
60S ribosomal protein L31 [Mus musculus]	gi|16716589 (+3)	-1.65323
