# Supplementary material for: Translation repression via modulation of the cytoplasmic poly(A)-binding protein in the inflammatory response
Source: eLife. 2017 Jun 21;6:e27786. doi: 10.7554/eLife.27786 (PMC5507668; doi:10.7554/eLife.27786)
Supplement: Supplementary file 3. — DOI: http://dx.doi.org/10.7554/eLife.27786.019 [file elife-27786-supp3.xlsx]

## Sheet: Sheet1
id	name	pvalue	peaks	RPKM
NM_011337	Ccl3	0	chr11:83647851-83648250_F_5.30_P_0.00e+00	4025.92
NM_013652	Ccl4	0	chr11:83664451-83664600_F_4.04_P_0.00e+00	2883.8
NM_011521	Sdc4	0	chr2:164425001-164425100_F_3.97_P_0.00e+00	1439.39	chr2:164425301-164425400_F_2.16_P_8.09e-124	1439.39
NM_010907	Nfkbia	4.17e-178	chr12:55489601-55489650_F_5.43_P_4.17e-178	1268.6
NM_007707	Socs3	0	chr11:117966101-117966200_F_28.64_P_0.00e+00	1261.31
NM_013693	Tnf	0	chr17:35199401-35200400_F_13.06_P_0.00e+00	1140.45	chr17:35200501-35200550_F_3.57_P_7.51e-94	chr17:35201701-35201750_F_3.58_P_3.10e-100	1140.45
NM_011333	Ccl2	0	chr11:82037301-82037400_F_6.02_P_0.00e+00	758.595
NM_008361	Il1b	0	chr2:129364901-129364950_F_2.82_P_3.82e-56	751.591	751.591
NM_009140	Cxcl2	0	chr5:90905851-90905900_F_6.83_P_0.00e+00	708.996	chr5:90904151-90904200_F_2.98_P_2.02e-69	chr5:90905501-90905550_F_20.13_P_0.00e+00	chr5:90905651-90905800_F_5.23_P_0.00e+00	708.996
NM_008842	Pim1	0	chr17:29495151-29495200_F_10.67_P_0.00e+00	578.668	578.668
NM_178598	Tagln2	2.72e-48	chr1:172507101-172507150_F_4.25_P_2.72e-48	450.839
NM_001111099	Cdkn1a	7.32e-184	chr17:29099651-29099750_F_2.84_P_1.25e-118	437.506	437.506
NM_011029	Rpsa	2.07e-68	chr9:120129451-120129500_F_2.99_P_2.07e-68	416.561
NM_001001491	Tpm4	0	chr8:72152951-72153000_F_11.14_P_0.00e+00	388.653
NM_008176	Cxcl1	1.99e-181	chr5:90892701-90892800_F_8.18_P_1.99e-181	333.079	chr5:90892851-90892900_F_4.63_P_2.19e-130	333.079
NM_010493	Icam1	0	chr9:21028251-21028400_F_5.44_P_0.00e+00	302.033
NM_001166402	Tnfaip3	0	chr10:19001951-19002000_F_4.21_P_2.08e-46	229.903	chr10:19001201-19001350_F_5.98_P_0.00e+00	229.903
NM_011756	Zfp36	0	chr7:28377451-28377550_F_5.37_P_1.48e-323	226.166	chr7:28377801-28377850_F_3.72_P_8.40e-79	chr7:28377051-28377200_F_5.20_P_0.00e+00	226.166
NM_133954	Usb1	4.82e-41	chr8:95347001-95347050_F_2.83_P_4.82e-41	190.8
NM_013642	Dusp1	0	chr17:26506151-26506200_F_115.53_P_0.00e+00	158.537	chr17:26505651-26505950_F_12.10_P_0.00e+00	chr17:26506001-26506100_F_14.35_P_0.00e+00	158.537
NM_021893	Cd274	0	chr19:29386851-29386900_F_6.73_P_6.40e-88	158.466	chr19:29387901-29388000_F_6.14_P_0.00e+00	chr19:29387151-29387300_F_7.24_P_0.00e+00	chr19:29386151-29386300_F_4.11_P_0.00e+00	158.466
NM_001331052	Hdgf	5.87e-74	chr3:87915101-87915150_F_13.67_P_5.87e-74	158.406
NM_011198	Ptgs2	0	chr1:150105851-150105950_F_10.35_P_0.00e+00	155.122	chr1:150107301-150107450_F_7.95_P_0.00e+00	chr1:150106001-150106100_F_4.58_P_0.00e+00	chr1:150105651-150105800_F_11.65_P_0.00e+00	155.122
NM_031168	Il6	4.95e-282	chr5:30019651-30019750_F_6.93_P_4.95e-282	150.619
NM_011803	Klf6	1.29e-74	chr13:5868901-5868950_F_4.14_P_1.29e-74	138.85	138.85
NM_033617	Atp6v0b	3.72999799984e-318	chr4:117884551-117884600_F_12.59_P_3.73e-318	136.142
NM_026386	Snx2	8.03e-196	chr18:53198701-53198750_F_22.88_P_8.03e-196	135.024
NM_008357	Il15	7.71e-143	chr8:82331701-82331750_F_7.49_P_7.71e-143	132.282
NM_183426	Sbno2	1.2e-97	chr10:80057101-80057150_F_12.65_P_1.20e-97	131.367
NM_001159624	Rnpep	9.05e-160	chr1:135271951-135272000_F_109.39_P_9.05e-160	126.397
NM_133662	Ier3	0	chr17:35822801-35822900_F_13.97_P_0.00e+00	122.628
NM_011331	Ccl12	0	chr11:82103251-82103300_F_18.89_P_0.00e+00	119.539
NM_001145835	Ralgds	3.36e-106	chr2:28552951-28553000_F_8.93_P_3.36e-106	117.969
NM_001037859	Csf1r	3.14e-195	chr18:61120701-61120750_F_13.87_P_3.14e-195	116.348
NM_009320	Slc6a6	3.55e-112	chr6:91701001-91701050_F_10.05_P_3.55e-112	107.497
NM_007614	Ctnnb1	2.85e-72	chr9:120933501-120933550_F_5.75_P_2.85e-72	93.6992
NM_144539	Slamf7	4.22e-42	chr1:171633251-171633300_F_3.67_P_4.22e-42	91.0766
NM_146252	Tbc1d13	5.47e-256	chr2:30151351-30151400_F_23.01_P_5.47e-256	84.7238
NM_016888	B3gnt2	6.9e-176	chr11:22835151-22835200_F_12.58_P_6.90e-176	83.7546
NM_026646	Slc25a22	1.8e-100	chr7:141430651-141430700_F_5.43_P_1.80e-100	80.7244
NM_001289704	Cflar	0	chr1:58758751-58758800_F_3.45_P_1.46e-94	80.4793	chr1:58757751-58757950_F_13.82_P_0.00e+00	chr1:58755251-58755300_F_5.21_P_1.47e-99	80.4793
NM_010757	Mafk	2.63e-156	chr5:139801651-139801700_F_5.05_P_2.63e-156	78.5009
NM_172498	Ptk2b	9.27e-173	chr14:66213701-66213750_F_11.47_P_9.27e-173	76.8403
NM_153117	9530068E07Rik	0	chr11:52403301-52403350_F_10.15_P_0.00e+00	75.4967
NM_172608	Tmem184b	5.98e-225	chr15:79362501-79362550_F_16.87_P_5.98e-225	75.0241
NM_010786	Mdm2	2.18e-113	chr10:117689751-117689800_F_10.79_P_2.18e-113	73.9142
NM_008142	Gnb1	8.05e-234	chr4:155522801-155522850_F_15.63_P_8.05e-234	70.7536
NM_001317355	Pld3	0	chr7:27535701-27535750_F_82.55_P_0.00e+00	65.5483
NM_001164662	Cyfip1	1.54e-71	chr7:55931801-55931850_F_7.44_P_1.54e-71	65.1211
NM_001114332	Slc16a10	2.29e-160	chr10:40035401-40035450_F_5.09_P_2.29e-160	64.3615
NM_198018	Abr	2.5e-174	chr11:76472501-76472550_F_6.63_P_2.50e-174	64.2705
NM_010548	Il10	0	chr1:131024801-131024850_F_31.95_P_1.76e-250	63.5397	63.5397
NM_026252	Cpeb4	3.02e-73	chr11:31935351-31935400_F_8.25_P_3.02e-73	57.1042
NM_181397	Rftn1	7.4e-95	chr17:50009201-50009250_F_7.95_P_7.40e-95	53.1303
NM_172856	Cers6	2.13e-84	chr2:69108851-69108900_F_3.49_P_2.13e-84	50.9316
NM_010219	Fkbp4	1.56e-259	chr6:128430751-128430800_F_17.92_P_1.56e-259	49.4831
NM_030565	Fam20c	0	chr5:138793751-138793850_F_16.87_P_0.00e+00	49.0492
NM_001324486	Il10ra	0	chr9:45254701-45254750_F_9.89_P_3.41e-120	48.6281	chr9:45254201-45254250_F_4.72_P_4.54e-89	48.6281
NM_009399	Tnfrsf11a	8.49e-70	chr1:105845051-105845100_F_7.34_P_8.49e-70	46.7206
NM_001025361	Klc1	0	chr12:111763701-111763750_F_14.31_P_0.00e+00	43.7526
NM_133685	Rab31	2.36e-272	chr17:65692201-65692250_F_10.19_P_2.36e-272	43.5151
NM_172285	Plcg2	1.47e-114	chr8:117562751-117562800_F_9.12_P_1.47e-114	41.6979
NM_172723	Adap1	0	chr5:139272051-139272100_F_20.76_P_0.00e+00	40.8653
NM_023719	Txnip	4.66e-93	chr3:96558951-96559000_F_7.86_P_4.66e-93	40.6375
NM_007858	Diaph1	2.99e-86	chr18:37844851-37844900_F_3.75_P_2.99e-86	37.2959
NM_178892	Tiparp	9.19e-208	chr3:65554851-65554950_F_13.26_P_9.19e-208	36.3394
NM_007508	Atp6v1a	0	chr16:44085601-44085650_F_10.68_P_0.00e+00	35.6025
NM_026155	Ssr3	5.35e-51	chr3:65381601-65381650_F_3.54_P_5.35e-51	34.6405
NM_001302811	Cic	3.08e-177	chr7:25273251-25273300_F_19.99_P_3.08e-177	33.862
NM_008360	Il18	6.23e-264	chr9:50573501-50573550_F_46.88_P_6.23e-264	32.0408
NM_025772	Dtnbp1	6.67e-215	chr13:44951351-44951400_F_47.44_P_6.67e-215	31.0822
NM_010496	Id2	1.79e-50	chr12:25094351-25094400_F_5.06_P_1.79e-50	30.8974
NM_023721	Atp6v1d	3.4e-133	chr12:78843351-78843400_F_5.72_P_3.40e-133	29.2301
NM_027815	9030624J02Rik	1.72e-118	chr7:118744051-118744100_F_37.58_P_1.72e-118	28.9022
NM_001033759	Tmem2	4.03e-104	chr19:21856351-21856400_F_8.60_P_4.03e-104	28.83
NM_172584	Itpk1	9.79e-103	chr12:102615451-102615500_F_18.66_P_9.79e-103	28.5869
NM_010700	Ldlr	0	chr9:21748351-21748400_F_15.98_P_0.00e+00	26.9931	chr9:21749801-21749850_F_5.06_P_2.28e-105	26.9931
NM_013880	Plcl2	2.95e-105	chr17:50605301-50605350_F_12.62_P_2.95e-105	25.0137
NM_010422	Hexb	0	chr13:97190551-97190600_F_5.98_P_0.00e+00	22.5199
NM_027915	Ap2b1	0	chr11:83324001-83324050_F_12.13_P_0.00e+00	21.8397
NM_009466	Ugdh	0	chr5:65423901-65423950_F_26.09_P_0.00e+00	21.3793
NM_023598	Arid5b	5.47e-165	chr10:68234801-68234850_F_16.19_P_5.47e-165	20.5245
NM_181402	Parp11	2.48e-172	chr6:127483751-127483800_F_29.95_P_2.48e-172	19.4373
NM_001113188	Fxr1	3.69e-213	chr3:34020151-34020200_F_22.73_P_3.69e-213	18.4511
NM_001111021	Runx1	1.57e-103	chr16:92661801-92661850_F_20.84_P_1.57e-103	17.6244
NM_026693	Gabarapl2	3.27e-102	chr8:111950601-111950650_F_20.65_P_3.27e-102	16.1808
NM_010909	Nfkbil1	0	chr17:35233951-35234000_F_14.64_P_0.00e+00	14.71
NM_019400	Rabep1	2.01e-118	chr11:70875401-70875450_F_17.36_P_2.01e-118	13.6972
NM_009677	Ap1g1	6.85e-260	chr8:109830951-109831000_F_10.29_P_6.85e-260	13.481
NM_145965	Gphn	2.1e-91	chr12:78350851-78350900_F_13.62_P_2.10e-91	13.4604
NM_001190379	Camta2	4.06e-116	chr11:70669851-70669900_F_11.79_P_4.06e-116	11.7881
NM_009025	Rasa3	1.44e-203	chr8:13669551-13669600_F_38.62_P_1.44e-203	11.4127
NM_025895	Med28	2.21e-55	chr5:45525501-45525550_F_7.22_P_2.21e-55	10.9772
NM_026908	Cab39l	1.57e-132	chr14:59441501-59441550_F_14.68_P_1.57e-132	10.8697
NM_001033318	Cog7	0	chr7:121928551-121928600_F_143.99_P_0.00e+00	10.7508
NM_001177879	Phka2	8.39e-144	chrX:160506601-160506650_F_35.16_P_8.39e-144	10.3485
NM_001110251	Hmbs	2.55e-134	chr9:44337051-44337100_F_20.51_P_2.55e-134	10.0052
NM_033565	Aff4	7.83e-153	chr11:53420251-53420300_F_8.53_P_7.83e-153	9.72747
NM_015804	Atp11a	1.48e-102	chr8:12811551-12811600_F_15.75_P_1.48e-102	9.47519
NM_020505	Vav3	7.73e-152	chr3:109443851-109443900_F_61.39_P_7.73e-152	9.40195
NM_001199357	Tmem164	3.71e-262	chrX:142842601-142842650_F_162.97_P_3.71e-262	9.25856
NM_024248	Cars2	9.49e-192	chr8:11538601-11538650_F_22.55_P_9.49e-192	8.90299
NM_001039493	Plekhm3	0	chr1:64893801-64893850_F_10.87_P_0.00e+00	8.59439
NM_023060	Eefsec	2.42e-170	chr6:88325551-88325600_F_22.32_P_2.42e-170	8.43752
NM_177698	Psd3	2.04e-167	chr8:67844401-67844450_F_17.17_P_2.04e-167	7.83528
NM_153457	Rtn1	0	chr12:72384851-72384900_F_16.34_P_0.00e+00	7.1246
NM_001166547	Eif4enif1	3.05e-89	chr11:3220901-3220950_F_18.79_P_3.05e-89	6.87403
NM_178633	Klhl2	0	chr8:64762301-64762350_F_65.07_P_0.00e+00	6.6917
NM_001347169	Nrd1	4.71e-133	chr4:109019101-109019150_F_33.21_P_4.71e-133	6.46506
NM_024433	Mtap	1.75e-145	chr4:89148651-89148700_F_12.65_P_1.75e-145	6.36395
NM_028291	Pan3	4.75e-150	chr5:147534401-147534450_F_60.83_P_4.75e-150	6.30936
NM_007869	Dnajc1	3.48e-313	chr2:18215351-18215400_F_21.15_P_3.48e-313	6.21737
NM_010585	Itpr1	0	chr6:108213801-108213850_F_14.73_P_0.00e+00	6.20301
NM_026825	Carmil1	3.31e-199	chr13:24026951-24027000_F_24.93_P_3.31e-199	6.1051
NM_011216	Ptpro	0	chr6:137409701-137409750_F_27.87_P_0.00e+00	6.04523
NM_012024	Ppp2r5e	0	chr12:75596151-75596200_F_113.11_P_0.00e+00	5.6773
NM_015829	Slc25a13	0	chr6:6068601-6068650_F_23.19_P_0.00e+00	5.61409
NM_008729	Ctnnd2	1.68e-267	chr15:30788651-30788700_F_26.69_P_1.68e-267	5.59001	5.59001
NM_013454	Abca1	0	chr4:53114601-53114650_F_19.04_P_0.00e+00	5.00297
NM_153599	Cdk8	1.14e-285	chr5:146261151-146261200_F_7.11_P_1.14e-285	4.86787
NM_001081355	Prdm2	8.51e-240	chr4:143120301-143120350_F_20.89_P_8.51e-240	4.80544
NM_145220	Appl2	4.3e-64	chr10:83600701-83600750_F_9.67_P_4.30e-64	4.805
NM_001308352	Pparg	8.03e-73	chr6:115407901-115407950_F_13.53_P_8.03e-73	4.74859
NM_177290	Itgb8	2.42e-224	chr12:119214151-119214200_F_83.16_P_2.42e-224	4.73536
NM_146191	Lrrk1	1.29e-125	chr7:66293351-66293400_F_7.60_P_1.29e-125	4.66771
NM_175184	Mvb12b	1.44e-146	chr2:33865701-33865750_F_16.56_P_1.44e-146	4.58812
NM_008520	Ltbp3	1.19e-96	chr19:5744201-5744250_F_11.40_P_1.19e-96	4.3886
NM_054089	Tgs1	0	chr4:3606051-3606100_F_21.93_P_0.00e+00	4.36764
NM_198298	Helz	8.19e-162	chr11:107570501-107570550_F_110.51_P_8.19e-162	4.36639
NM_019874	Dnajb5	1.57e-160	chr4:42954301-42954350_F_25.51_P_1.57e-160	4.34519
NM_001289926	2010111I01Rik	1.23e-117	chr13:63056201-63056250_F_4.94_P_1.23e-117	4.34104
NM_019501	Pdss1	0	chr2:22903201-22903250_F_12.97_P_0.00e+00	4.15802
NM_001113389	Dyrk1a	2.02e-201	chr16:94610001-94610050_F_131.72_P_2.02e-201	3.92497
NM_172924	Peak1	0	chr9:56243351-56243400_F_13.84_P_0.00e+00	3.87132
NM_001013368	E2f8	0	chr7:48870101-48870150_F_30.54_P_0.00e+00	3.84957
NM_020608	Cramp1l	2.02e-222	chr17:24985551-24985600_F_82.60_P_2.02e-222	3.77667
NM_178639	Sfxn5	0	chr6:85322551-85322600_F_58.08_P_0.00e+00	3.74015
NM_177151	Vps13b	1.61e-94	chr15:35740651-35740700_F_4.86_P_1.61e-94	3.64981
NM_029945	Smpd4	1.27e-165	chr16:17628401-17628450_F_8.67_P_1.27e-165	3.40576
NM_026502	1110004E09Rik	1.61e-90	chr16:90934301-90934350_F_18.98_P_1.61e-90	3.39176
NM_021429	Hs1bp3	2.51e-81	chr12:8313601-8313650_F_12.61_P_2.51e-81	3.13712
NM_178016	Pigk	4.44e-101	chr3:152785401-152785450_F_11.24_P_4.44e-101	3.09706
NM_172451	Galnt6	0	chr15:100725651-100725700_F_123.90_P_0.00e+00	2.91355
NM_030730	Rad54l2	0	chr9:106724401-106724450_F_23.44_P_0.00e+00	2.82116
NM_010236	Fpgs	3.17e-289	chr2:32687101-32687150_F_101.58_P_3.17e-289	2.81004
NM_027258	Rnf157	7.35e-191	chr11:116386551-116386600_F_126.13_P_7.35e-191	2.77217
NM_028709	Btbd11	0	chr10:85398801-85398850_F_19.21_P_0.00e+00	2.71764
NM_001285805	Zbtb20	2.65999998124e-316	chr16:43185001-43185050_F_46.88_P_2.66e-316	2.63555
NM_001168571	Ctps2	1.63e-163	chrX:162986251-162986300_F_28.84_P_1.63e-163	2.53193
NM_001080969	Thg1l	5.98e-87	chr11:45954251-45954300_F_11.16_P_5.98e-87	2.47138
NM_001159518	Igfbp7	5.48e-131	chr5:77354101-77354150_F_18.60_P_5.48e-131	2.25587
NM_026516	Tmem178	1.1e-142	chr17:80948201-80948250_F_7.70_P_1.10e-142	2.05983
NM_001310517	Lman2l	2.9e-101	chr1:36444401-36444450_F_7.58_P_2.90e-101	2.00542
NM_011711	Fmnl3	2.34e-101	chr15:99324301-99324350_F_15.63_P_2.34e-101	1.9515
NM_175645	Xylt1	0	chr7:117599851-117599900_F_235.52_P_0.00e+00	1.78079
NM_177780	Dock5	0	chr14:67932901-67932950_F_33.04_P_0.00e+00	1.47223
NM_013630	Pkd1	5.97e-119	chr17:24570951-24571000_F_6.50_P_5.97e-119	1.41886
NM_201352	Gdpd5	1.47e-84	chr7:99459901-99459950_F_12.18_P_1.47e-84	1.22203
NM_001308095	Nadsyn1	0	chr7:143798201-143798250_F_26.44_P_0.00e+00	1.20174
NM_001346751	Ccdc28a	3.23e-105	chr10:18217351-18217400_F_12.04_P_3.23e-105	1.13559
NM_008632	Map2	1.98e-175	chr1:66245201-66245250_F_68.65_P_1.98e-175	1.12676
NM_001199024	Pla2g6	2.55e-154	chr15:79302601-79302650_F_20.84_P_2.55e-154	1.07561
NM_172595	Arl15	1.61e-256	chr13:114105751-114105800_F_32.51_P_1.61e-256	1.07096
NM_021343	Spata5	0	chr3:37481551-37481600_F_13.91_P_0.00e+00	1.04789
NM_027188	Smyd3	0	chr1:179145301-179145350_F_18.57_P_0.00e+00	1.04585
NM_173406	Jazf1	0	chr6:52961051-52961100_F_21.88_P_0.00e+00	1.00707
NM_146169	Paip2b	9.78e-88	chr6:83815001-83815050_F_16.74_P_9.78e-88	0.984452
NM_146033	Ankmy2	5.29e-207	chr12:36184351-36184400_F_34.23_P_5.29e-207	0.983617
NM_001081341	Scaper	2.18e-113	chr9:55562451-55562500_F_10.79_P_2.18e-113	0.854467
NM_026916	Nupr1l	3.57e-158	chr5:129910951-129911000_F_6.76_P_3.57e-158	0.697045
NM_001113353	Synj2	1.22e-77	chr17:5951551-5951600_F_10.39_P_1.22e-77	0.613439
NM_001282977	Cacnb1	0	chr11:98003201-98003250_F_13.31_P_0.00e+00	0.589559
NM_053122	Immp2l	5.78e-193	chr12:41324851-41324900_F_127.25_P_5.78e-193	0.573228
NM_175750	Plxna4	3.65e-157	chr6:32423601-32423650_F_7.62_P_3.65e-157	0.555149
NM_010513	Igf1r	1.52e-139	chr7:68038601-68038650_F_13.84_P_1.52e-139	0.464546
NM_177379	Arhgap32	0	chr9:32236401-32236450_F_13.85_P_0.00e+00	0.459457
NM_009403	Tnfsf8	0	chr4:63843601-63843650_F_20.86_P_0.00e+00	0.440746
NM_175171	Mast4	4.79e-77	chr13:102984451-102984500_F_13.02_P_4.79e-77	0.40941
NM_145401	Prkag2	1.17e-220	chr5:25025201-25025250_F_141.76_P_1.17e-220	0.393189
NM_054041	Antxr1	0	chr6:87207701-87207750_F_12.82_P_0.00e+00	0.373702	0.373702
NM_198302	Rbm11	2.16e-132	chr16:75593001-75593050_F_55.25_P_2.16e-132	0.363853
NM_009640	Angpt1	0	chr15:42531801-42531850_F_34.60_P_0.00e+00	0.354025
NM_001163610	Nhsl2	1.99e-116	chrX:102079601-102079650_F_13.48_P_1.99e-116	0.352878
NM_010210	Fhit	0	chr14:10004501-10004550_F_12.45_P_0.00e+00	0.333068
NM_001205353	Gramd4	2.14e-200	chr15:86072451-86072500_F_38.18_P_2.14e-200	0.329963
NM_021381	Prokr1	8.19e-162	chr6:87587151-87587200_F_110.51_P_8.19e-162	0.295595
NM_177622	Zfp595	9.49e-63	chr13:67331451-67331500_F_4.36_P_9.49e-63	0.251081
NM_175510	Unc80	1.61e-73	chr1:66675001-66675050_F_8.86_P_1.61e-73	0.234518
NM_001177536	Prdm11	0	chr2:93016301-93016350_F_21.92_P_0.00e+00	0.233845
NM_153393	Col23a1	2.09e-71	chr11:51369551-51369600_F_7.87_P_2.09e-71	0.21257
NM_010167	Eya4	3.11e-102	chr10:23159101-23159150_F_7.48_P_3.11e-102	0.184044
NM_172788	Sh3rf3	0	chr10:58972501-58972550_F_15.66_P_0.00e+00	0.169853
NM_177879	Sdk1	2.85e-75	chr5:141948651-141948700_F_7.28_P_2.85e-75	0.128617
NM_197996	Tspan15	0	chr10:62197951-62198000_F_25.71_P_0.00e+00	0.121116
NM_013675	Sptb	0	chr12:76660401-76660450_F_40.52_P_0.00e+00	0.115664
NM_178680	Unc45b	2.64e-234	chr11:82916051-82916100_F_10.07_P_2.64e-234	0.0925084
NM_001081413	Unc13b	5.41e-200	chr4:43200351-43200400_F_10.59_P_5.41e-200	0.0855564
NM_172910	Dlgap2	0	chr8:14721401-14721450_F_158.28_P_0.00e+00	0.072722
NM_001170669	Pde8b	0	chr13:95093401-95093450_F_13.88_P_0.00e+00	0.0710304	0.0710304
NM_001001980	Limch1	2.62e-93	chr5:66955101-66955150_F_11.68_P_2.62e-93	0.0534238
NM_001081270	Dscaml1	5.16e-198	chr9:45484301-45484350_F_29.66_P_5.16e-198	0.0476853
NM_008806	Pde6b	1.59e-153	chr5:108426501-108426550_F_24.72_P_1.59e-153	0.0389811
NM_008130	Gli3	9.22e-178	chr13:15481901-15481950_F_50.97_P_9.22e-178	0.0388467
NM_007601	Capn3	2.76e-105	chr2:120501101-120501150_F_14.96_P_2.76e-105	0.0346637
NM_028296	Car10	2.13e-263	chr11:93164201-93164250_F_28.24_P_2.13e-263	0.0327362
NM_172813	Enox1	8.54e-225	chr14:77335351-77335400_F_7.59_P_8.54e-225	0.0313059
NM_001290313	Wnk2	2.4e-281	chr13:49147251-49147300_F_16.19_P_2.40e-281	0.030393
NM_001286784	Magi1	0	chr6:94254501-94254550_F_27.67_P_0.00e+00	0.0279983
NM_011350	Sema4f	0	chr6:82934101-82934150_F_21.90_P_0.00e+00	0.0267469
NM_172614	Tmem44	8.05e-75	chr16:30518251-30518300_F_12.77_P_8.05e-75	0.0257417
NM_175032	Galntl6	1.05e-99	chr8:58329401-58329450_F_9.63_P_1.05e-99	0.0214523
NM_172563	Hlf	1.29939264856e-321	chr11:90389101-90389150_F_23.37_P_1.30e-321	0.0192392
NM_007868	Dmd	0	chrX:84981051-84981100_F_48.74_P_0.00e+00	0.0158155
NM_178259	Abca13	2.38e-174	chr11:9386901-9386950_F_50.23_P_2.38e-174	0.00682885
NM_001081078	Lct	0	chr1:128291901-128291950_F_11.52_P_3.62e-153	0	0
NM_011784	Aplnr	1.22e-69	chr2:85138551-85138600_F_8.27_P_1.22e-69	0
NM_174991	Adgrb1	6.52e-121	chr15:74516401-74516450_F_17.61_P_6.52e-121	0
NM_025466	Gkn1	2.48e-77	chr6:87346201-87346250_F_6.27_P_2.48e-77	0
NM_011372	St6galnac3	3.06e-131	chr3:153584401-153584450_F_40.56_P_3.06e-131	0
NM_001285438	Rbfox3	8.04e-173	chr11:118655801-118655850_F_9.67_P_8.04e-173	0
NM_028848	Spata17	1.49e-97	chr1:187147251-187147300_F_16.46_P_1.49e-97	0
NM_008734	Nrg3	7.19e-135	chr14:38561751-38561800_F_25.12_P_7.19e-135	0
NM_182698	Myo15	1.38e-53	chr11:60491951-60492000_F_6.47_P_1.38e-53	0
NM_177701	Gm4894	1.23e-135	chr9:49268651-49268700_F_20.65_P_1.23e-135	0
NM_001312908	Cux2	1.55000000002e-313	chr5:121961451-121961500_F_78.88_P_1.55e-313	0
NM_013848	Ermap	0	chr4:119185551-119185600_F_53.39_P_0.00e+00	0
NM_001130177	Tnnt2	1.18e-207	chr1:135846501-135846550_F_27.91_P_1.18e-207	0
NM_009134	Scn10a	0	chr9:119638651-119638700_F_40.60_P_0.00e+00	0
NM_011934	Esrrb	1.1e-247	chr12:86481801-86481850_F_25.27_P_1.10e-247	0
NM_001085373	Mcc	1.52e-312	chr18:44480501-44480550_F_34.48_P_1.52e-312	0
NM_001033283	Oosp3	0	chr19:11698451-11698500_F_136.18_P_0.00e+00	0
NM_172435	P2ry10	4e-138	chrX:107102001-107102050_F_7.90_P_4.00e-138	0
NM_001007221	Adam22	5.96e-171	chr5:8127351-8127400_F_49.49_P_5.96e-171	0
NM_001104642	Vmn2r27	7.64e-159	chr6:124226201-124226250_F_11.16_P_7.64e-159	0
NM_130880	Otud7a	2.07e-205	chr7:63727101-63727150_F_30.46_P_2.07e-205	0
NM_207683	Pik3c2g	0	chr6:139941951-139942000_F_54.88_P_0.00e+00	0
NM_001167878	Skint5	1.97e-82	chr4:113685351-113685400_F_12.73_P_1.97e-82	0
NM_001276710	Agxt	1.27e-82	chr1:93143401-93143450_F_4.65_P_1.27e-82	0
NM_177328	Grm7	1.41e-173	chr6:111497051-111497100_F_24.56_P_1.41e-173	0
NM_011698	Lin7b	6.33e-141	chr7:45368901-45368950_F_21.21_P_6.33e-141	0
NM_008852	Pitx3	6.29e-251	chr19:46144951-46145000_F_35.24_P_6.29e-251	0
NM_175561	Pcnx2	1.09000021687e-317	chr8:125853451-125853500_F_28.37_P_1.09e-317	0
NM_008516	Lrrn1	0	chr6:107552901-107552950_F_27.91_P_0.00e+00	0
NM_178790	Abi3bp	2.37e-233	chr16:56538101-56538150_F_27.91_P_2.37e-233	0
NM_030688	Il1rapl2	2.4e-186	chrX:137683551-137683600_F_52.83_P_2.40e-186	0
NM_001271679	Wnk3	7.33e-58	chrX:151297851-151297900_F_7.96_P_7.33e-58	0
NM_172804	Syt16	6.3e-302	chr12:74116751-74116800_F_14.97_P_6.30e-302	0
NM_001347412	Dlgap1	1.16e-154	chr17:70071151-70071200_F_10.98_P_1.16e-154	0
NM_177773	4933408B17Rik	5.49e-225	chr18:34583701-34583750_F_61.02_P_5.49e-225	0
NM_175176	Erich3	3.98e-149	chr3:154716501-154716550_F_15.88_P_3.98e-149	0
NM_019707	Cdh13	2.02e-222	chr8:119284251-119284300_F_82.60_P_2.02e-222	0
NM_001271663	Gjb6	2.43e-73	chr14:57133251-57133300_F_5.01_P_2.43e-73	0
NM_001004367	Cxxc4	7.1e-90	chr3:134247751-134247800_F_5.71_P_7.10e-90	0
NM_001172121	Rbms3	2.15e-180	chr9:117284701-117284750_F_120.55_P_2.15e-180	0
NM_022416	Stk32b	1.75e-120	chr5:37643501-37643550_F_26.34_P_1.75e-120	0
NM_145218	Wbscr17	5.98e-87	chr5:130981951-130982000_F_11.16_P_5.98e-87	0
NM_019445	Fmn2	3e-91	chr1:174649601-174649650_F_7.95_P_3.00e-91	0
NM_008167	Grid2	7.98e-113	chr6:63556801-63556850_F_12.06_P_7.98e-113	0
NM_012028	St6galnac5	0	chr3:152975801-152975850_F_178.60_P_0.00e+00	0
NM_011447	Sox8	2.02e-152	chr17:25568301-25568350_F_13.53_P_2.02e-152	0
NM_001001979	Megf10	7.27e-115	chr18:57261701-57261750_F_9.37_P_7.27e-115	0
NM_001025584	Kcnj6	1.64e-254	chr16:94814651-94814700_F_20.76_P_1.64e-254	0
NM_023878	Cldn10	1.15e-108	chr14:118848151-118848200_F_17.72_P_1.15e-108	0
NM_001291061	Bfsp1	1.1e-223	chr2:143836601-143836650_F_12.60_P_1.10e-223	0
NM_181074	Lingo1	3.23e-142	chr9:56647451-56647500_F_29.69_P_3.23e-142	0
NM_001168645	Slc6a18	0	chr13:73668901-73668950_F_60.83_P_0.00e+00	0
NM_001161832	T2	0	chr17:8404901-8405000_F_8.05_P_0.00e+00	0
NM_011720	Wnt8b	2.66e-199	chr19:44511501-44511550_F_130.60_P_2.66e-199	0
NM_001290519	Sun3	3.89e-264	chr11:9029251-9029300_F_16.96_P_3.89e-264	0
NM_008499	Lhx5	2.74e-229	chr5:120441001-120441050_F_42.19_P_2.74e-229	0
NM_001083919	Xirp2	2.67e-156	chr2:67500601-67500650_F_14.30_P_2.67e-156	0
NM_015820	Hs6st3	3.61e-55	chr14:119777551-119777600_F_7.74_P_3.61e-55	0
NM_172496	Cobl	2.29e-99	chr11:12238601-12238650_F_7.99_P_2.29e-99	0
NM_029928	Ptprb	1.6e-159	chr10:116353251-116353300_F_6.66_P_1.60e-159	0
NM_008779	Cntn3	4.75e-150	chr6:102398601-102398650_F_60.83_P_4.75e-150	0
NM_001253890	Prkar1b	8.76000000014e-314	chr5:139050751-139050800_F_7.79_P_8.76e-314	0
NM_009197	Slc16a2	1.26e-158	chrX:103741701-103741750_F_32.15_P_1.26e-158	0
NM_019664	Kcnj15	3.58e-261	chr16:95268451-95268500_F_6.92_P_3.58e-261	0
NM_001177581	7420461P10Rik	0	chr1:162657451-162657500_F_42.86_P_0.00e+00	0
NM_021464	Ptprt	2.65e-265	chr2:162047401-162047450_F_94.88_P_2.65e-265	0	0
