# Supplementary material for: Translation repression via modulation of the cytoplasmic poly(A)-binding protein in the inflammatory response
Source: eLife. 2017 Jun 21;6:e27786. doi: 10.7554/eLife.27786 (PMC5507668; doi:10.7554/eLife.27786)
Supplement: Supplementary file 4. — DOI: http://dx.doi.org/10.7554/eLife.27786.020 [file elife-27786-supp4.xlsx]

## Sheet: Sheet1
REAGENT or RESOURCE	SOURCE	IDENTIFIER
Antibodies
Mouse-anti-HA (F-7)	Santa Cruz	sc-7392	1:1000 good signal
Mouse anti-V5	Invitrogen	46-0705	For Zfp36-V5 IP in BMDM cells
Rabbit anti-V5	BETHYL	A190-120A	For Zfp36-V5 CLIP in BMDM cells
Mouse anti-Flag (OctA-prob (H-5))	Santa Cruz	sc-166355	1:1000 good signal
Rat anti-Flag (anti-DYKDDDDK Tag)	Biolegend	637302	IP in 293T cells
Rabbit anti-PABP1	Cell Signaling Tech	4922
Mouse anti-GAPDH	Santa Cruz	sc-32233
Goat anti-Rat IgG-HRP	Santa Cruz	sc-2032
Donkey anti-Rabbit IgG-HRP	GE Healthcare Life Sciences	NA934V
Sheep anti-Mouse IgG-HRP	GE Healthcare Life Sciences	NA931V
Normal mouse IgG	Santa Cruz	sc-2025
Normal rabbit IgG	Santa Cruz	sc-2027
Normal Rat IgG	Santa Cruz	sc-2026
Chemicals, Peptides, and Recombinant Proteins
Dynabeads Protein G	Life Technologies	10004D
RNase I	Ambion	AM2295
SUPERase In RNase Inhibitor	Ambion	AM2696
Recombinant RNase A	Ambion	AM2269
Glycogen	Invitrogen	10814-010
FuGENE 6 Transfection Reagent	Promega	E2691
Polybrene
LPS
Western Lightning Plus ECL Enhanced Luminol Reagent PLUS
Western Lightning Plus ECL Oxidizing Reagent PLUS
Q5 High-Fidelity DNA Ploymerase	New England Biolabs	M0491
SuperScript II Reverse Transcriptase	Invitrogen	18064-022
RiboZol RNA Extraction Reagents	Amresco	N580
2X SYBR Green qPCR Master Mix	Biotool	B21202
Dnase I	New England Biolabs	M0303S
FBS	EMD MILLIPORE	TMS-013
Trypsin	Gibco	25200072
L-glutamine	Gibco	25030081
Protease Inhibitor Cocktail	Biotool	B14001
Phosphatase Inhibitor Cocktail	Biotool	B15001
PVDF membrane
Nitrocellulose membrane
Critical Commercial Assays
EZ-10 Spin Column DNA Gel Extraction Kit	Bio Basic Inc	BS654
EZ-10 Spin Column Plasmid DNA Minipreps Kit	Bio Basic Inc	BS614
PureLink HiPure Plasmid Filter Maxiprep Kit	Invitrogen	K210017
Gibson Assembly Master Mix	New England Biolabs	E2611
Mouse IL-6 ELISA MAX™ Deluxe Set	Biolegend	431304
Mouse TNF-α ELISA MAX™ Deluxe Set	Biolegend	430904
Dual-Luciferase Reporter Assay System	Promega	E1960
Experimental Models: Cell Lines
293T
Experimental Models: Organisms/Strains
DH5a E.coli	This study	N/A
Recombinant DNA
pWH64, pCL-Eco, Retroviral packing vector	Addgene	#12371
pWH129, pMSCV PIG, Retroviral control vector	Addgene	#21654
Zfp36-Flag over-expression vector	This study	pWH500
PABP1-HA over-expression vector	This study	pWH511
Zfp36-F118N-Flag over-expression vector	This study	pWH524
Zfp36 1-176AA-F118N-Flag over-expression vector	This study	pWH592
Zfp36 79-319AA-F118N-Flag over-expression vector	This study	pWH593
Zfp36 152-319AA-Flag over-expression vector	This study	pWH515
Zfp36 79-176AA-F118N-Flag over-expression vector	This study	pWH536
Zfp36 59-196AA-F118N-Flag over-expression vector	This study	pWH532
Zfp36 39-196AA-F118N-Flag over-expression vector	This study	pWH537
Zfp36 39-176AA-F118N-Flag over-expression vector	This study	pWH534
Zfp36 39-196AA-F118N over-expression retroviral vector	This study	pWH560
Luciferase reporter with 5 BoxB sites in the 3'UTR	Wenqian Hu 2014 DC	pWH290
Control plasmid for pWH290 without the 5 BoxB sites	Wenqian Hu 2014 DC	pWH291
lambdaN-GFP plasmid	Wenqian Hu 2014 DC	pWH294
lambdaN-Zfp36 expression vector	This study	pWH517
lambdaN-Zfp36 1-107AA expression vector	This study	pWH553
lambdaN-Zfp36 152-319AA expression vector	This study	pWH554
Sequence-Based Reagents
ACTTAAGCTTACCatgGATGATCTCTCTGCCATCTACGAGAGCCT	This study	oWH2526	Forward oligoe to amplify mouse Zfp36-3FLAG for GA cloning onto EcoRV cut pWH498
GTGGTCCTTGTAGTCGATCTCAGAGACAGAGATACGATTGAAGAT	This study	oWH2527	Reverse oligoe to amplify mouse Zfp36-3FLAG for GA cloning onto EcoRV cut pWH498
ACTTAAGCTTACCatgGATAACCCCAGCGCCCCCAGCTA	This study	oWH2549	Forward olgioe to amplify mouse Pabp1-3HA for GA cloning onto EcoRV cut pWH499
GAACATCGTATGGGTAGATGACAGTTGGAACACCAGTGGCACTGT	This study	oWH2550	Reverse olgioe to amplify mouse Pabp1-3HA for GA cloning onto EcoRV cut pWH499
GTGGTCCTTGTAGTCGAT GCTTTGTCGCAGCACATGGG	This study	oWH2552	Reverse oligoe to amplify Zfp36 1-176 for GA cloning onto EcoRV cut pWH498
ACTTAAGCTTACCatgGAT CTGTCACCCTCACCTACTTCGCCT	This study	oWH2553	Forward oligoe to amplify mouse Zfp36 79-319-3FLAG for GA cloning onto EcoRV cut pWH498
ACTTAAGCTTACCatgGAT TCTCGATGCCACTTCATCCACAAC	This study	oWH2554	Forward oligoe to amplify mouse Zfp36 152-319-3FLAG for GA cloning onto EcoRV cut pWH498
tccaagcttgaattctGAT GATCTCTCTGCCATCTACGAGAGCCT	This study	oWH2557	Forward oligo to amplify mouse Zfp36 CDS without ATG for GA cloning onto EcoRV cut pWH497
gggataggcttaccGAT CTCAGAGACAGAGATACGATTGAAGAT	This study	oWH2558	Reverse oligo to amplify mouse Zfp36 CDS without stop codon for GA cloning onto EcoRV cut pWH497
tcgctacggggccaagtgccag AAT GCTCACGGCCTGGGTGAACTTC	This study	oWH2573	Forward oligo for Site-directed mutagenesis oligoes to introduce F1118N to mouse Zpf36
GAAGTTCACCCAGGCCGTGAGCATTCTGGCACTTGGCCCCGTAGCGA	This study	oWH2574	Reverse oligo for Site-directed mutagenesis oligoes to introduce F1118N to mouse Zpf36
ACTTAAGCTTACCatgGAT CCGTCTGGGGTCACCTCTCGCC	This study	oWH2576	Forward oligo to amplify mouse Zfp36 from AA39 for GA cloning onto EcoRV cut pWH498
ACTTAAGCTTACCatgGAT TGTGGCTGGGTACCCCCACCC	This study	oWH2577	Forward oligo to amplify mouse Zfp36 from AA59 for GA cloning onto EcoRV cut pWH498
GTGGTCCTTGTAGTCGAT AGAAAAGCCTGGAGGTGGCGG	This study	oWH2578	Reverse oligo to amplify mouse Zfp36 to AA196 for GA cloning onto EcoRV cut pWH498
gggataggcttaccGAT GCTTTCTGAGTAGGTCCGACAGAGCT	This study	oWH2620	Reverse oligo to amplify mouse Zfp36 1-107 for GA cloning onto EcoRV cut pWH497, use with oWH2557
tccaagcttgaattctGAT TCTCGATGCCACTTCATCCACAAC	This study	oWH2621	Forward oligo to amplify mouse Zfp36 152-319 for GA cloning onto EcoRV cut pWH497, use with oWH2558
Ttctctaggcgccggaatta ATG CCGTCTGGGGTCACCTCTCGCC	This study	oWH2649	Forward oligo for cloning mouse Zfp36mH (39-196aa)-FLAG onto Bgl2/EcoR1 cut pWH129 via GA cloning, Bgl2 site
Gcgcctcccctacccggtag TCACTTGTCGTCGTCGTCCTTGTAG	This study	oWH2651	Common reverse oligo for cloning C-terminus FALG tagged protein onto Bgl2/EcoR1 cut pWH129 via GA cloning, EcoR1 site
CTGGCCAGGGAGAGCTAGGTC	This study	oWH2568	Genotyping oligoes for TTP KO mouse
CGAATCCCTCGGAGGACTTTGGAAC	This study	oWH2652	Genotyping oligoes for TTP KO mouse
GTAACCCGTTGAACCCCATT	This study	oWH145	forward oligo for 18S rRNA (mouse), used as internal control for realtime PCR
ccatccaatcggtagtagcg	This study	oWH146	reverse oligo for 18S rRNA (mouse), used as internal control for realtime PCR
GCAAAGTGGAGATTGTTGCCAT	This study	oWH170	forward oligo for real-time PCR on mouse GAPDH, amplicon size is 107bp
CCTTGACTGTGCCGTTGAATTT	This study	oWH171	reverse oligo for real-time PCR on mouse GAPDH, amplicon size is 107bp
CCTGTAGCCCACGTCGTAG	This study	oWH1966	Real-time PCR oligo for mouse TNF-alpha mRNA
GGGAGTAGACAAGGTACAACCC	This study	oWH1967	Real-time PCR oligo for mouse TNF-alpha mRNA
CTGCAAGAGACTTCCATCCAG	This study	oWH2045	Real-time PCR oligo for mouse IL6 mRNA
AGTGGTATAGACAGGTCTGTTGG	This study	oWH2046	Real-time PCR oligo for mouse IL6 mRNA
CCGAATCCCTCGGAGGACTT	This study	oWH2047	Real-time PCR oligo for mouse Zfp36 mRNA
GAGCCAAAGGTGCAAAACCA	This study	oWH2048	Real-time PCR oligo for mouse Zfp36 mRNA
		Reporter related
CACCGGTCATATGCC GATTCGTCAGTAGGGTTGTAAAGGTTTTTCT	This study	oWH2561	Forward oligo to amplify mouse MALAT1 functional 3’end for GA cloning onto Sac2 cut pWH492
AGATCTGGGCCCCC AAGCAAAGACACCGCAGGGACTTGA	This study	oWH2562	Reverse oligo to amplify mouse MALAT1 functional 3’end for GA cloning onto Sac2 cut pWH492
TGTCTTTGAGGCAGGGGTGTTTGGGCCTCCCCAGACCCCTGCACCCCCAAGGCGTCTCCCCATCT TC ggtaagcctatccctaaccctctcctcggtctcgattctacgtaaGTCAATCGTATCTCTGTCTCTGAGTGACAAGTGCCTACCTACCCAGTATGGATCAGCTAGATCTCA	This study	oWH2057
TAATACGACTCACTATAgGGGGACAGAGATACGATTGAAGAGTTTtagagctaGAAAtagcaagttaaaataaggctagtccgttatcaacttgaaaaagtggcaccgagtcggtgcTTTTTT	This study	oWH2056
